# Supplementary material for: Implementing N-terminomics and machine learning to probe in vivo Nt-arginylation
Source: bioRxiv preprint, doi:10.1101/2025.04.09.646507, version 1 (2025-04-09)
Supplement: Supplementary Data 8 [file 646507_file12.xlsx]

## Sheet: All peptides
sequence	charge	nAA	index	irt	mods	mod_sites	rt_norm	rt_pred	irt_pred	fit	lwr	upr
AAAAAAAAAPAAAATAPTTAATTAATAAQ	2	29	1	58.7936	NA	NA	0.778066	0.775962	58.6779	58.7031	56.8319	60.5743
AAAAAAAAAPAAAATAPTTAATTAATAAQ	3	29	2	58.7936	NA	NA	0.778066	0.775962	58.6779	58.7031	56.8319	60.5743
AAAAAAALQAK	2	11	3	30.8028	NA	NA	0.269142	0.2897	31.9335	31.9924	30.1211	33.8637
AAAAAWEEPSSGNGTAR	2	17	4	40.0464	NA	NA	0.437208	0.436926	40.0309	40.0797	38.2084	41.9509
AAAASAAEAGIATTGTEDSDDALLK	2	25	5	59.5137	NA	NA	0.791158	0.791309	59.522	59.5462	57.6749	61.4174
AAAEDVNVTFEDQQK	2	15	6	47.4491	NA	NA	0.571802	0.578269	47.8048	47.8437	45.9725	49.7149
AAAEEGHIIPR	2	11	7	32.4598	NA	NA	0.29927	0.301639	32.5901	32.6483	30.777	34.5195
AAAEVAGQFVIK	2	12	9	52.7995	NA	NA	0.669082	0.665865	52.6226	52.6554	50.7842	54.5266
AAAEVNQDYGLDPK	2	14	10	44.7424	NA	NA	0.522589	0.5289	45.0895	45.1319	43.2607	47.0031
AAAGAAATHLEVAR	2	14	11	34.1324	NA	NA	0.32968	0.335986	34.4792	34.535	32.6637	36.4063
AAAGLGGGDSGDGTAR	2	16	12	29.0212	NA	NA	0.236749	0.244014	29.4208	29.4829	27.6116	31.3543
AAAIGIDLGTTYSCVGVFQHGK	2	22	13	68.6881	Carbamidomethyl@C	14	0.957966	0.956861	68.6273	68.64	66.7687	70.5113
AAAIGIDLGTTYSCVGVFQHGK	3	22	14	68.7204	Carbamidomethyl@C	14	0.958552	0.956861	68.6273	68.64	66.7687	70.5113
AAALAAAVAQDPAASGAPSS	2	20	15	57.1463	NA	NA	0.748115	0.706956	54.8826	54.9126	53.0414	56.7838
AAALEFLNR	2	9	17	56.1575	NA	NA	0.730136	0.746212	57.0417	57.069	55.1978	58.9402
AAALEQFK	2	8	18	38.5116	NA	NA	0.409302	0.408294	38.4562	38.5069	36.6357	40.3781
AAAPAPEEEMDECEQALAAEPK	2	22	19	61.4322	Carbamidomethyl@C	13	0.826041	0.826921	61.4806	61.5023	59.6311	63.3736
AAAPAPEEEMDECEQALAAEPK	2	22	20	50.764	Oxidation@M;Carbamidomethyl@C	10;13	0.632073	0.630072	50.654	50.6893	48.8181	52.5605
AAAQCYIDLIIK	2	12	22	72.034	Carbamidomethyl@C	5	1.0188	1.01139	71.6266	71.6355	69.7641	73.5068
AAATPESQEPQAK	2	13	23	26.7141	NA	NA	0.194801	0.192957	26.6127	26.6783	24.807	28.5497
AAAVLPVLDLAQR	2	13	24	71.5056	NA	NA	1.00919	1.00861	71.4736	71.4826	69.6113	73.354
AACEQQAVALTLQEDR	2	16	25	53.5881	Carbamidomethyl@C	3	0.683421	0.694751	54.2113	54.2422	52.371	56.1134
AACLESAQEPAGAWGNK	2	17	26	48.0853	Carbamidomethyl@C	3	0.583369	0.58221	48.0215	48.0602	46.189	49.9314
AACLLDGVPVALK	2	13	27	67.2005	Carbamidomethyl@C	3	0.930917	0.936314	67.4973	67.5113	65.64	69.3826
AADAEAEVASLNR	2	13	28	41.8558	NA	NA	0.470105	0.518002	44.4901	44.5332	42.662	46.4044
AADCEVEQWDSDEPIPAK	2	18	29	57.78	Carbamidomethyl@C	4	0.759636	0.765234	58.0879	58.1138	56.2426	59.985
AADEEAFEDNSEEYIR	2	16	30	56.2418	NA	NA	0.731668	0.733876	56.3632	56.3913	54.5201	58.2625
AADFQLHTHVNDGTEFGGSIYQK	3	23	32	54.7989	NA	NA	0.705434	0.703469	54.6908	54.721	52.8498	56.5922
AADMGNPVGQSGLGMAYLYGR	2	21	34	71.7331	NA	NA	1.01333	0.997092	70.84	70.8499	68.9786	72.7212
AADPPAENSSAPEAEQGGAE	2	20	35	38.7317	NA	NA	0.413305	0.375188	36.6353	36.6884	34.8171	38.5596
AADTIGYPVMIR	2	12	36	60.1837	NA	NA	0.803339	0.807144	60.3929	60.416	58.5448	62.2872
AADTIGYPVMIR	2	12	37	54.852	Oxidation@M	10	0.7064	0.70527	54.7899	54.82	52.9488	56.6912
AAEAAAAPAESAAPAAGEEPSK	2	22	38	38.8991	NA	NA	0.416348	0.40824	38.4532	38.5039	36.6327	40.3752
AAEAAAAPAESAAPAAGEEPSKEEGEPK	2	28	40	38.8167	NA	NA	0.414849	0.414561	38.8008	38.8511	36.9799	40.7224
AAEAAAAPAESAAPAAGEEPSKEEGEPK	3	28	41	38.8439	NA	NA	0.415343	0.414561	38.8008	38.8511	36.9799	40.7224
AAEDDEDDDVDTK	2	13	43	27.8756	NA	NA	0.21592	0.220838	28.1461	28.2098	26.3385	30.0812
AAEDLFVNIR	2	10	44	61.4013	NA	NA	0.825478	0.826591	61.4625	61.4842	59.6129	63.3554
AAFALGGLGSGFASNR	2	16	52	67.1351	NA	NA	0.929729	0.926694	66.9682	66.9829	65.1116	68.8542
AAFDDAIAELDTLSEESYK	2	19	53	73.2805	NA	NA	1.04146	1.04246	73.3354	73.3421	71.4707	75.2135
AAFGLSEAGFNTACVTK	2	17	55	63.8898	Carbamidomethyl@C	14	0.870724	0.867769	63.7273	63.7461	61.8749	65.6174
AAFTAFEEAQLPR	2	13	56	64.3488	NA	NA	0.879068	0.85635	63.0993	63.1189	61.2476	64.9901
AAFVLPEFAR	2	10	57	68.6881	NA	NA	0.957966	0.961551	68.8853	68.8977	67.0263	70.769
AAFVSEQQQK	2	10	58	29.7018	NA	NA	0.249124	0.25941	30.2675	30.3286	28.4573	32.1999
AAGASDVVLYK	2	11	59	43.2769	NA	NA	0.495944	0.49623	43.2926	43.3373	41.4661	45.2085
AAGCDFTNVVK	2	11	60	45.2364	Carbamidomethyl@C	4	0.53157	0.520702	44.6386	44.6815	42.8104	46.5527
AAGGFTHDELLK	2	12	61	41.9612	NA	NA	0.472022	0.476376	42.2007	42.2467	40.3755	44.1179
AAGHEPHLLAR	3	11	62	27.6681	NA	NA	0.212148	0.210296	27.5663	27.6307	25.7594	29.5021
AAGPLLTDECR	2	11	63	41.8302	Carbamidomethyl@C	10	0.469639	0.47685	42.2268	42.2727	40.4015	44.1439
AAGVVLEMIR	2	10	66	60.0374	NA	NA	0.800681	0.813869	60.7628	60.7854	58.9142	62.6566
AAHSEGNTTAGLDMR	2	15	69	32.0382	NA	NA	0.291603	0.296942	32.3318	32.3903	30.519	34.2616
AAHSEGNTTAGLDMR	2	15	71	26.5478	Oxidation@M	14	0.191779	0.187912	26.3351	26.4012	24.5298	28.2726
AAHSEGNTTAGLDMR	3	15	72	26.5478	Oxidation@M	14	0.191779	0.187912	26.3351	26.4012	24.5298	28.2726
AAIDWFDGK	2	9	74	61.9803	NA	NA	0.836005	0.842388	62.3313	62.3519	60.4807	64.2232
AAIGLLAR	2	8	75	47.0273	NA	NA	0.564133	0.563377	46.9857	47.0257	45.1545	48.8969
AAIISAEGDSK	2	11	76	33.0667	NA	NA	0.310303	0.314446	33.2945	33.3518	31.4805	35.2231
AALADVLR	2	8	78	50.075	NA	NA	0.619545	0.61001	49.5506	49.5873	47.7161	51.4585
AALAHSEEVTASQVAATK	2	18	79	39.9402	NA	NA	0.435277	0.426775	39.4726	39.5221	37.6509	41.3933
AALAHSEEVTASQVAATK	3	18	80	39.9148	NA	NA	0.434815	0.426775	39.4726	39.5221	37.6509	41.3933
AALCHFCIDMLNAK	3	14	81	61.5818	Carbamidomethyl@C;Carbamidomethyl@C	4;7	0.82876	0.813325	60.7329	60.7555	58.8843	62.6267
AALEALGSCLNNK	2	13	82	52.2477	Carbamidomethyl@C	9	0.659049	0.675527	53.154	53.1862	51.315	55.0574
AALEAQNALHNMK	2	13	83	39.548	NA	NA	0.428146	0.451896	40.8543	40.902	39.0308	42.7732
AALEAVGGTVVLE	2	13	84	69.974	NA	NA	0.981345	0.917674	66.4721	66.4875	64.6162	68.3587
AALEDTLAETEAR	2	13	85	51.9713	NA	NA	0.654023	0.662668	52.4467	52.4798	50.6086	54.351
AALEEANGEIEK	2	12	86	38.3224	NA	NA	0.405862	0.409015	38.4958	38.5465	36.6753	40.4178
AALEEEVR	2	8	87	34.0759	NA	NA	0.328653	0.326336	33.9485	34.0049	32.1336	35.8762
AALEELVK	2	8	88	47.3168	NA	NA	0.569396	0.581984	48.0091	48.0478	46.1766	49.919
AALETDENLLLCAPTGAGK	2	19	89	66.1697	Carbamidomethyl@C	12	0.912176	0.920151	66.6083	66.6235	64.7522	68.4948
AALLNQHYQVNFK	2	13	91	50.9879	NA	NA	0.636145	0.637598	51.0679	51.1027	49.2315	52.9739
AALMESQGQQQEER	2	14	92	33.6723	NA	NA	0.321314	0.307466	32.9106	32.9684	31.0971	34.8397
AALQELLSK	2	9	94	54.331	NA	NA	0.696928	0.699849	54.4917	54.5222	52.651	56.3934
AALRPLVK	2	8	95	30.291	NA	NA	0.259836	0.25936	30.2648	30.3259	28.4546	32.1972
AALSASEGEEVPQDK	2	15	97	39.4153	NA	NA	0.425733	0.40927	38.5099	38.5605	36.6893	40.4318
AALTGLLHR	2	9	99	44.0177	NA	NA	0.509412	0.504228	43.7326	43.7766	41.9054	45.6478
AALTGLLHR	3	9	100	44.0177	NA	NA	0.509412	0.504228	43.7326	43.7766	41.9054	45.6478
AALVDLEPGTMDSVR	2	15	101	63.448	NA	NA	0.862691	0.857792	63.1786	63.1981	61.3269	65.0693
AAMDNSEIAGEK	2	12	102	33.8975	NA	NA	0.325409	0.327748	34.0261	34.0824	32.2112	35.9537
AAMEALVVEVTK	2	12	103	63.2728	NA	NA	0.859505	0.85698	63.1339	63.1535	61.2822	65.0247
AANAAENDFSVSQAEMSSR	2	19	104	51.598	NA	NA	0.647236	0.629337	50.6136	50.6489	48.7778	52.5201
AANDAGYFNDEMAPIEVK	2	18	105	65.8133	NA	NA	0.905697	0.912511	66.1881	66.2038	64.3325	68.0751
AANGVVLATEK	2	11	106	35.2369	NA	NA	0.349761	0.351137	35.3125	35.3672	33.496	37.2385
AANNGALPPDLSYIVR	2	16	107	67.6314	NA	NA	0.938753	0.937657	67.5712	67.5851	65.7138	69.4564
AANWYER	2	7	108	37.5553	NA	NA	0.391915	0.394855	37.717	37.7687	35.8974	39.6399
AAPFSLEYR	2	9	112	54.4411	NA	NA	0.698929	0.698315	54.4073	54.4379	52.5667	56.3091
AAPGAEFAPNK	2	11	113	36.5813	NA	NA	0.374206	0.367194	36.1957	36.2493	34.378	38.1205
AAPTAASDQPDSAATTEK	2	18	115	31.5193	NA	NA	0.28217	0.276037	31.182	31.2419	29.3706	33.1133
AAQDFFSTCR	2	10	116	48.8781	Carbamidomethyl@C	9	0.597783	0.582611	48.0436	48.0822	46.2111	49.9534
AAQDRDQIYR	2	10	117	26.9138	NA	NA	0.198433	0.182736	26.0505	26.1169	24.2455	27.9883
AAQHGVCSVLK	2	11	119	29.6717	Carbamidomethyl@C	7	0.248577	0.246037	29.5321	29.5941	27.7227	31.4654
AAQLAIR	2	7	120	32.4372	NA	NA	0.298858	0.306445	32.8545	32.9123	31.041	34.7836
AAQQAASSSGQGQQAQTPTGK	2	21	123	26.2378	NA	NA	0.186141	0.184004	26.1202	26.1865	24.3151	28.0579
AAQVAQDEEIAR	2	12	124	34.8596	NA	NA	0.342901	0.366511	36.1581	36.2117	34.3405	38.083
AASAAGAAGSAGGSSGAAGAAGGGAGAGTRPGDGGTASAGAAGPGAATK	3	49	126	38.2665	NA	NA	0.404846	0.403252	38.1788	38.2299	36.3587	40.1012
AASAAGAAGSAGGSSGAAGAAGGGAGAGTRPGDGGTASAGAAGPGAATK	4	49	127	38.2665	NA	NA	0.404846	0.403252	38.1788	38.2299	36.3587	40.1012
AASAATAAPTATPAAQESGTIPK	2	23	128	44.3957	NA	NA	0.516286	0.51591	44.3751	44.4183	42.5471	46.2895
AASADSTTEGTPADGFTVLSTK	2	22	129	58.9864	NA	NA	0.781571	0.783256	59.0791	59.1038	57.2326	60.975
AASAGQEPLHNEELAGAGR	3	19	130	38.6273	NA	NA	0.411406	0.417301	38.9515	39.0017	37.1304	40.8729
AASDIAMTELPPTHPIR	2	17	131	53.7578	NA	NA	0.686506	0.693969	54.1683	54.1992	52.328	56.0704
AASDIAMTELPPTHPIR	3	17	132	53.9115	NA	NA	0.6893	0.693969	54.1683	54.1992	52.328	56.0704
AASGFNAMEDAQTLR	2	15	133	54.9556	NA	NA	0.708283	0.711264	55.1195	55.1492	53.278	57.0204
AASHLLSIHK	3	10	134	28.9046	NA	NA	0.234629	0.231115	28.7113	28.7744	26.903	30.6457
AASIFGGAK	2	9	135	37.1088	NA	NA	0.383797	0.37945	36.8698	36.9225	35.0513	38.7937
AASVHTVGEDTEETPHR	3	17	138	29.7826	NA	NA	0.250592	0.250459	29.7753	29.837	27.9656	31.7083
AATFFGCIGIDK	2	12	141	67.1351	Carbamidomethyl@C	7	0.929729	0.915854	66.3719	66.3874	64.5162	68.2587
AATLEGWK	2	8	142	42.3811	NA	NA	0.479656	0.465993	41.6296	41.6763	39.8051	43.5475
AATSDLEHYDK	2	11	143	32.7471	NA	NA	0.304492	0.308604	32.9732	33.0309	31.1596	34.9022
AATSPALFNR	2	10	144	42.995	NA	NA	0.490818	0.498482	43.4165	43.461	41.5898	45.3322
AAVDAGFVPNDMQVGQTGK	2	19	147	59.1036	NA	NA	0.783702	0.786178	59.2398	59.2643	57.393	61.1355
AAVDAGFVPNDMQVGQTGK	2	19	148	51.1209	Oxidation@M	12	0.638562	0.634169	50.8793	50.9144	49.0432	52.7855
AAVEDSGTTVETIK	2	14	149	40.764	NA	NA	0.450254	0.445569	40.5063	40.5544	38.6832	42.4256
AAVEEGIVLGGGCALLR	2	17	150	69.2185	Carbamidomethyl@C	13	0.967609	0.96796	69.2378	69.2497	67.3784	71.121
AAVEEGIVLGGGCALLR	3	17	151	69.2185	Carbamidomethyl@C	13	0.967609	0.96796	69.2378	69.2497	67.3784	71.121
AAVELEEPEDAR	2	12	152	43.6459	NA	NA	0.502654	0.49878	43.4329	43.4773	41.6061	45.3485
AAVENLPTFLVELSR	2	15	153	73.2601	NA	NA	1.04109	1.04045	73.225	73.2319	71.3605	75.1033
AAVLLEQER	2	9	159	40.0997	NA	NA	0.438177	0.451181	40.8149	40.8627	38.9915	42.7339
AAVPDAVGK	2	9	160	31.1794	NA	NA	0.275988	0.291929	32.0561	32.1149	30.2436	33.9862
AAVPSGASTGIYEALELR	2	18	161	71.1105	NA	NA	1.00201	1.00687	71.3781	71.3873	69.5159	73.2586
AAVPSGASTGIYEALELR	3	18	162	71.1105	NA	NA	1.00201	1.00687	71.3781	71.3873	69.5159	73.2586
AAVPSIK	2	7	163	32.4598	NA	NA	0.29927	0.299293	32.4611	32.5194	30.6481	34.3907
AAVQFLNNAWGIQK	2	14	164	68.223	NA	NA	0.949509	0.96486	69.0673	69.0794	67.2081	70.9507
AAWEAYLSR	2	9	166	58.7341	NA	NA	0.776985	0.773088	58.5199	58.5453	56.6741	60.4165
AAYEAELGDAR	2	11	167	41.3037	NA	NA	0.460067	0.473719	42.0545	42.1007	40.2295	43.9719
AAYFGIYDTAK	2	11	168	56.7942	NA	NA	0.741713	0.741125	56.7619	56.7895	54.9183	58.6607
AAYFGVYDTAK	2	11	169	52.4714	NA	NA	0.663117	0.667719	52.7245	52.7573	50.8861	54.6285
AAYLQETGKPLDETLK	2	16	170	50.0474	NA	NA	0.619044	0.629729	50.6351	50.6705	48.7993	52.5416
AAYNPGQAVPWNAVK	2	15	172	58.3249	NA	NA	0.769544	0.758893	57.7391	57.7655	55.8943	59.6367
AAYPDLENPPLLVTPSQQAK	2	20	173	69.2507	NA	NA	0.968194	0.954928	68.521	68.5338	66.6625	70.4051
ACADATLSQITNNIDPVGR	2	19	174	69.2185	Carbamidomethyl@C	2	0.967609	0.986446	70.2546	70.2651	68.3938	72.1365
ACAELHQNVNVK	2	12	175	30.2342	Carbamidomethyl@C	2	0.258804	0.265632	30.6097	30.6704	28.7991	32.5417
ACALSIEESCRPGDK	2	15	176	39.7477	Carbamidomethyl@C;Carbamidomethyl@C	2;10	0.431776	0.436472	40.0059	40.0547	38.1835	41.9259
ACANPAAGSVILLENLR	2	17	178	73.0103	Carbamidomethyl@C	2	1.03655	1.02975	72.6364	72.644	70.7726	74.5154
ACANPAAGSVILLENLR	3	17	179	73.0103	Carbamidomethyl@C	2	1.03655	1.02975	72.6364	72.644	70.7726	74.5154
ACDGNVDHAATHITNR	3	16	180	29.8347	Carbamidomethyl@C	2	0.25154	0.248098	29.6454	29.7072	27.8359	31.5786
ACDLPAWVHFPDTER	3	15	181	67.8752	Carbamidomethyl@C	2	0.943186	0.937556	67.5656	67.5796	65.7083	69.4509
ACEPGVDYVYK	2	11	182	46.7494	Carbamidomethyl@C	2	0.55908	0.562876	46.9582	46.9982	45.127	48.8694
ACFTMDPK	2	8	183	39.4978	Carbamidomethyl@C	2	0.427233	0.425924	39.4258	39.4753	37.6041	41.3466
ACGDSTLTQITAGLDPVGR	2	19	184	72.0681	Carbamidomethyl@C	2	1.01942	0.99907	70.9489	70.9586	69.0872	72.8299
ACGDSTLTQITAGLDPVGR	3	19	185	72.0681	Carbamidomethyl@C	2	1.01942	0.99907	70.9489	70.9586	69.0872	72.8299
ACGLNFADLMAR	2	12	186	70.9163	Carbamidomethyl@C	2	0.998478	1.00526	71.2891	71.2984	69.427	73.1697
ACGNFGIPCELR	2	12	187	57.4668	Carbamidomethyl@C;Carbamidomethyl@C	2;9	0.753941	0.749786	57.2382	57.2653	55.3941	59.1365
ACIPVGLLGK	2	10	188	58.1029	Carbamidomethyl@C	2	0.765507	0.777273	58.75	58.7751	56.9039	60.6464
ACLDTAVENMPSLK	2	14	189	60.3554	Carbamidomethyl@C	2	0.806462	0.801081	60.0595	60.0829	58.2117	61.9542
ACLDYPVTSVLPPASLCK	2	18	190	72.2678	Carbamidomethyl@C;Carbamidomethyl@C	2;17	1.02305	1.01267	71.697	71.7058	69.8344	73.5771
ACLENLGLK	2	9	191	48.9307	Carbamidomethyl@C	2	0.59874	0.593041	48.6173	48.6552	46.784	50.5263
ACLISLGYDVENDR	2	14	192	65.8696	Carbamidomethyl@C	2	0.90672	0.907878	65.9333	65.9493	64.0781	67.8206
ACPRPEGLNFQDLK	2	14	193	50.5155	Carbamidomethyl@C	2	0.627555	0.654962	52.0229	52.0565	50.1854	53.9277
ACQSIYPLHDVFVR	2	14	195	60.272	Carbamidomethyl@C	2	0.804945	0.815979	60.8789	60.9013	59.0301	62.7725
ACQSIYPLHDVFVR	3	14	196	60.272	Carbamidomethyl@C	2	0.804945	0.815979	60.8789	60.9013	59.0301	62.7725
ACVMMQGR	2	8	197	31.7544	Carbamidomethyl@C	2	0.286443	0.289942	31.9468	32.0057	30.1344	33.877
ACYGVLR	2	7	198	37.5553	Carbamidomethyl@C	2	0.391915	0.393477	37.6412	37.693	35.8217	39.5642
ADAEGESDLENSRK	2	14	201	28.1704	NA	NA	0.22128	0.222103	28.2157	28.2793	26.408	30.1507
ADAEGESDLENSRK	3	14	202	28.1704	NA	NA	0.22128	0.222103	28.2157	28.2793	26.408	30.1507
ADALQAGASQFETSAAK	2	17	204	52.2756	NA	NA	0.659557	0.670252	52.8639	52.8964	51.0252	54.7676
ADATNVNNWHWTER	2	14	205	50.2758	NA	NA	0.623196	0.62159	50.1875	50.2234	48.3522	52.0946
ADATNVNNWHWTER	3	14	206	50.2758	NA	NA	0.623196	0.62159	50.1875	50.2234	48.3522	52.0946
ADCPPGNPAPTSNHGPDATEAEEDFVDPWTVQTSSAK	3	37	208	67.8434	Carbamidomethyl@C	3	0.942608	0.944528	67.9491	67.9626	66.0913	69.8339
ADDADEFGYSR	2	11	210	42.777	NA	NA	0.486855	0.484743	42.6609	42.7063	40.8351	44.5775
ADDGRPFPQVIK	2	12	211	45.7446	NA	NA	0.540811	0.546591	46.0625	46.1037	44.2325	47.9748
ADDGRPFPQVIK	3	12	212	45.7183	NA	NA	0.540333	0.546591	46.0625	46.1037	44.2325	47.9748
ADDLLPLGDQTQDGDFGSR	2	19	213	67.6314	NA	NA	0.938753	0.948402	68.1621	68.1754	66.304	70.0467
ADEASELACPTPK	2	13	217	40.4894	Carbamidomethyl@C	9	0.445262	0.445267	40.4897	40.5379	38.6667	42.4091
ADEEPTPADGR	2	11	219	27.4328	NA	NA	0.207869	0.211227	27.6175	27.6819	25.8106	29.5533
ADEGISFR	2	8	220	41.1148	NA	NA	0.456632	0.465426	41.5984	41.6452	39.774	43.5164
ADEHVIDQGDDGDNFYVIER	3	20	221	59.5459	NA	NA	0.791744	0.799405	59.9673	59.9909	58.1196	61.8621
ADEVLEILK	2	9	222	62.6611	NA	NA	0.848384	0.842949	62.3622	62.3827	60.5115	64.254
ADEWLMK	2	7	223	49.0166	NA	NA	0.600301	0.609349	49.5142	49.551	47.6798	51.4222
ADFAQACQDAGVR	2	13	224	43.2525	Carbamidomethyl@C	7	0.495499	0.499699	43.4835	43.5279	41.6567	45.3991
ADFDNTVAIHPTSSEELVTLR	3	21	226	64.9091	NA	NA	0.889256	0.88553	64.7041	64.7217	62.8505	66.593
ADFQGISPER	2	10	227	43.7261	NA	NA	0.504112	0.501613	43.5887	43.6329	41.7618	45.5041
ADFSGMSQTDLSLSK	2	15	228	59.0161	NA	NA	0.782111	0.779295	58.8612	58.8862	57.015	60.7574
ADGGTQVIDTK	2	11	229	30.9513	NA	NA	0.271842	0.275116	31.1314	31.1913	29.32	33.0626
ADGIVPETWIDGPK	2	14	230	67.8123	NA	NA	0.942041	0.949187	68.2053	68.2185	66.3472	70.0898
ADGYEPPVQESV	2	12	231	54.4136	NA	NA	0.698429	0.693713	54.1542	54.1851	52.314	56.0563
ADHDFVVQEDFMK	2	13	232	56.9168	NA	NA	0.743941	0.752977	57.4137	57.4405	55.5693	59.3118
ADHDFVVQEDFMK	3	13	233	56.948	NA	NA	0.744509	0.752977	57.4137	57.4405	55.5693	59.3118
ADIDVSGPK	2	9	236	35.0445	NA	NA	0.346263	0.329775	34.1376	34.1938	32.3225	36.0651
ADIEISGPK	2	9	237	39.4153	NA	NA	0.425733	0.413416	38.7379	38.7882	36.917	40.6595
ADIEMPFDPSK	2	11	238	62.049	NA	NA	0.837255	0.838259	62.1043	62.1252	60.2539	63.9964
ADIEVACYGYEGIDAVK	2	17	239	65.9011	Carbamidomethyl@C	7	0.907293	0.914135	66.2774	66.293	64.4217	68.1643
ADIIYPGHGPVIHNAEAK	3	18	240	42.567	NA	NA	0.483037	0.482152	42.5183	42.5639	40.6927	44.4351
ADILQVGLR	2	9	241	56.767	NA	NA	0.741219	0.742939	56.8616	56.8891	55.0179	58.7603
ADLATAPPHVTVVR	2	14	243	45.2629	NA	NA	0.532052	0.53898	45.6439	45.6856	43.8144	47.5568
ADLEMQIENLK	2	11	244	61.5534	NA	NA	0.828244	0.829913	61.6452	61.6667	59.7955	63.5379
ADLEMQIENLK	2	11	246	60.2156	Oxidation@M	5	0.803919	0.806382	60.351	60.3741	58.5029	62.2453
ADLIAYLK	2	8	247	62.0152	NA	NA	0.836639	0.856443	63.1044	63.124	61.2527	64.9952
ADLINNLGTIAK	2	12	248	60.7044	NA	NA	0.812806	0.808047	60.4426	60.4656	58.5943	62.3368
ADLLLSTQPGR	2	11	249	50.333	NA	NA	0.624237	0.630929	50.7011	50.7364	48.8652	52.6076
ADLLLSTQPGREEGSPLELER	2	21	250	63.7439	NA	NA	0.868071	0.858858	63.2372	63.2567	61.3854	65.1279
ADLLLSTQPGREEGSPLELER	3	21	251	63.711	NA	NA	0.867472	0.858858	63.2372	63.2567	61.3854	65.1279
ADLSGMSGAR	2	10	252	34.2723	NA	NA	0.332223	0.334944	34.4219	34.4777	32.6065	36.349
ADLTEYLSTHYK	2	12	254	56.7392	NA	NA	0.740712	0.735943	56.4768	56.5048	54.6336	58.376
ADLTEYLSTHYK	3	12	255	56.7155	NA	NA	0.740282	0.735943	56.4768	56.5048	54.6336	58.376
ADMETLQR	2	8	256	34.4127	NA	NA	0.334777	0.325689	33.9129	33.9693	32.0981	35.8406
ADNFEYSDPVDGSISR	2	16	258	56.948	NA	NA	0.744509	0.74944	57.2192	57.2463	55.3751	59.1175
ADPDGPEAQAEACSGER	2	17	259	37.6693	Carbamidomethyl@C	13	0.393988	0.376402	36.7021	36.755	34.8838	38.6263
ADPEAAWEPTEAEAR	2	15	260	52.2214	NA	NA	0.65857	0.666457	52.6551	52.6879	50.8168	54.5591
ADQFEYVMYGK	2	11	262	58.7936	NA	NA	0.778066	0.793701	59.6536	59.6775	57.8063	61.5488
ADQFLVGTSR	2	10	263	45.1364	NA	NA	0.529754	0.527985	45.0392	45.0816	43.2104	46.9528
ADQVCINLR	2	9	265	45.577	Carbamidomethyl@C	5	0.537764	0.531335	45.2234	45.2656	43.3944	47.1368
ADRDESSPYAAMLAAQDVAQR	2	21	266	61.8344	NA	NA	0.833353	0.831771	61.7474	61.7687	59.8975	63.64
ADRDESSPYAAMLAAQDVAQR	3	21	267	61.8066	NA	NA	0.832846	0.831771	61.7474	61.7687	59.8975	63.64
ADSVVVLLCR	2	10	269	59.4199	Carbamidomethyl@C	9	0.789453	0.78479	59.1634	59.188	57.3168	61.0592
ADTGLETSTR	2	10	270	28.5912	NA	NA	0.22893	0.23802	29.0911	29.1536	27.2823	31.025
ADTLDPALLRPGR	2	13	271	51.5714	NA	NA	0.646752	0.657302	52.1516	52.1851	50.3139	54.0563
ADTLDPALLRPGR	3	13	272	51.5467	NA	NA	0.646304	0.657302	52.1516	52.1851	50.3139	54.0563
ADTQTYQPYNK	2	11	273	33.1523	NA	NA	0.311859	0.314209	33.2815	33.3387	31.4675	35.21
ADTSQEICSPR	2	11	274	32.0662	Carbamidomethyl@C	8	0.292112	0.288146	31.848	31.9071	30.0358	33.7784
ADVDVQPYAFTTK	2	13	275	55.7656	NA	NA	0.723011	0.721437	55.679	55.708	53.8368	57.5792
ADVDVSGPK	2	9	276	29.7826	NA	NA	0.250592	0.258458	30.2152	30.2763	28.405	32.1476
ADVEEEFLALR	2	11	277	71.077	NA	NA	1.0014	0.992646	70.5956	70.6057	68.7344	72.4771
ADVLTTGAGNPVGDK	2	15	279	44.7424	NA	NA	0.522589	0.525674	44.9121	44.9547	43.0835	46.8259
ADYEIASK	2	8	282	32.0969	NA	NA	0.292671	0.306957	32.8826	32.9404	31.0691	34.8117
ADYTSHLR	2	8	283	29.5883	NA	NA	0.24706	0.238914	29.1403	29.2028	27.3314	31.0741
AEACFVNCVER	2	11	285	45.4956	Carbamidomethyl@C;Carbamidomethyl@C	4;8	0.536284	0.531157	45.2136	45.2558	43.3846	47.127
AEAEAQAEELSFPR	2	14	286	54.0883	NA	NA	0.692514	0.708262	54.9544	54.9843	53.1132	56.8555
AEAEAWYQTK	2	10	287	42.2923	NA	NA	0.478042	0.481533	42.4843	42.53	40.6588	44.4012
AEAELLQQQK	2	10	288	36.4484	NA	NA	0.371789	0.370516	36.3784	36.4317	34.5605	38.303
AEAESMYQIK	2	10	290	34.1619	Oxidation@M	6	0.330216	0.332263	34.2745	34.3305	32.4592	36.2017
AEAGAGSATEFQFR	2	14	292	50.1324	NA	NA	0.620589	0.622571	50.2414	50.2773	48.4061	52.1485
AEAGDNLGALVR	2	12	293	50.1324	NA	NA	0.620589	0.632268	50.7747	50.8099	48.9387	52.6811
AEAGPEGVAPAPEGEK	2	16	294	37.4185	NA	NA	0.389427	0.381255	36.969	37.0217	35.1504	38.8929
AEAGVPAEFSIWTR	2	14	295	71.5738	NA	NA	1.01043	1.0016	71.0878	71.0974	69.226	72.9687
AEAQQVEALPGPSLDQWHR	3	19	296	59.6043	NA	NA	0.792805	0.79332	59.6326	59.6566	57.7854	61.5278
AEASIQAGAGDGEWEESEVK	2	20	297	52.4986	NA	NA	0.663611	0.669331	52.8132	52.8458	50.9746	54.717
AEASSGDHPTDTEMK	2	15	298	25.5521	NA	NA	0.173674	0.178857	25.8372	25.9038	24.0324	27.7752
AEASSGDHPTDTEMK	3	15	299	25.5521	NA	NA	0.173674	0.178857	25.8372	25.9038	24.0324	27.7752
AEDGENYDIK	2	10	303	34.0157	NA	NA	0.327557	0.327667	34.0217	34.078	32.2067	35.9493
AEDGENYDIKK	2	11	304	27.841	NA	NA	0.215291	0.231844	28.7514	28.8144	26.9431	30.6858
AEDGSVIDYELIDQDAR	2	17	305	67.1046	NA	NA	0.929175	0.92994	67.1467	67.1612	65.2899	69.0325
AEDGSVIDYELIDQDAR	3	17	306	67.1046	NA	NA	0.929175	0.92994	67.1467	67.1612	65.2899	69.0325
AEDNADTLALVFEAPNQEK	2	19	307	72.8274	NA	NA	1.03323	1.02605	72.4326	72.4405	70.5691	74.3118
AEDNADTLALVFEAPNQEK	3	19	308	72.8274	NA	NA	1.03323	1.02605	72.4326	72.4405	70.5691	74.3118
AEDSGEYHCVYHFVSAPK	3	18	309	47.7284	Carbamidomethyl@C	9	0.57688	0.578463	47.8155	47.8544	45.9832	49.7256
AEEAAPAAPPGPK	2	13	310	33.2928	NA	NA	0.314414	0.307415	32.9078	32.9655	31.0943	34.8368
AEEDEILNR	2	9	311	40.6284	NA	NA	0.44779	0.441217	40.2669	40.3154	38.4442	42.1866
AEEDTQFNYHR	2	11	312	34.4963	NA	NA	0.336297	0.333738	34.3556	34.4115	32.5402	36.2827
AEEELGELEAK	2	11	314	45.2091	NA	NA	0.531075	0.530996	45.2048	45.247	43.3758	47.1182
AEEIANEMIEAAK	2	13	315	56.5537	NA	NA	0.737339	0.759269	57.7598	57.7862	55.915	59.6574
AEELHYPLGER	2	11	317	42.9384	NA	NA	0.489788	0.502886	43.6587	43.7029	41.8317	45.5741
AEEYEFLTPVEEAPK	2	15	319	65.9339	NA	NA	0.907889	0.905417	65.7979	65.8141	63.9429	67.6854
AEFEDQDDEAR	2	11	320	33.6723	NA	NA	0.321314	0.302565	32.6411	32.6992	30.8279	34.5705
AEFGDFDIK	2	9	321	59.391	NA	NA	0.788926	0.795381	59.746	59.7698	57.8986	61.6411
AEFVEVTK	2	8	322	39.4153	NA	NA	0.425733	0.442247	40.3236	40.372	38.5007	42.2432
AEGAATEEEGTPK	2	13	323	26.1369	NA	NA	0.184308	0.192078	26.5643	26.63	24.7587	28.5014
AEGDVAALNR	2	10	325	34.802	NA	NA	0.341854	0.34011	34.706	34.7615	32.8902	36.6328
AEGLGDGYR	2	9	327	33.7576	NA	NA	0.322866	0.331717	34.2444	34.3005	32.4292	36.1718
AEGPDVAVDLPK	2	12	328	52.4143	NA	NA	0.662078	0.64956	51.7258	51.7598	49.8886	53.631
AEGPEVDVNLPK	2	12	329	51.3552	NA	NA	0.642822	0.644012	51.4207	51.455	49.5838	53.3262
AEGSDVANAVLDGADCIMLSGETAK	2	25	330	73.1971	Carbamidomethyl@C	16	1.03995	1.04608	73.5347	73.5411	71.6697	75.4125
AEGSDVANAVLDGADCIMLSGETAK	3	25	331	73.1971	Carbamidomethyl@C	16	1.03995	1.04608	73.5347	73.5411	71.6697	75.4125
AEGSDVANAVLDGADCIMLSGETAK	2	25	332	72.9665	Carbamidomethyl@C;Oxidation@M	16;18	1.03575	1.03239	72.7814	72.7888	70.9174	74.6602
AEGYAEGDLTLYHR	2	14	334	49.2332	NA	NA	0.604239	0.620555	50.1305	50.1665	48.2953	52.0377
AEHDQLLLNYAK	2	12	335	47.5916	NA	NA	0.574392	0.565697	47.1133	47.1531	45.2819	49.0243
AEHDQLLLNYAK	3	12	336	47.5612	NA	NA	0.573839	0.565697	47.1133	47.1531	45.2819	49.0243
AEHDSILAEK	2	10	337	29.3296	NA	NA	0.242357	0.249221	29.7071	29.7689	27.8976	31.6403
AEIDMLDIR	2	9	338	62.3075	NA	NA	0.841954	0.843004	62.3652	62.3858	60.5145	64.257
AEINILLCGDPGTSK	2	15	339	63.2996	Carbamidomethyl@C	8	0.859992	0.859871	63.2929	63.3123	61.441	65.1835
AEISCIDNK	2	9	340	32.5402	Carbamidomethyl@C	5	0.300731	0.330457	34.1751	34.2312	32.36	36.1025
AEITDAEGLGLK	2	12	346	53.1952	NA	NA	0.676276	0.675663	53.1615	53.1936	51.3225	55.0648
AEITFDDHK	2	9	347	33.7576	NA	NA	0.322866	0.335362	34.4449	34.5007	32.6294	36.372
AELANIER	2	8	348	36.6595	NA	NA	0.375627	0.374439	36.5942	36.6472	34.776	38.5185
AELDDTPMR	2	9	350	39.1734	NA	NA	0.421334	0.420832	39.1458	39.1956	37.3244	41.0669
AELEIQK	2	7	351	33.2692	NA	NA	0.313985	0.312781	33.203	33.2603	31.3891	35.1316
AELFTQSCADLDK	2	13	352	52.7723	Carbamidomethyl@C	8	0.668588	0.666415	52.6528	52.6856	50.8144	54.5568
AELNEFLTR	2	9	355	55.5906	NA	NA	0.719829	0.743375	56.8856	56.9131	55.0419	58.7843
AELNPWPEYIYTR	2	13	356	71.4072	NA	NA	1.0074	1.00671	71.3689	71.3781	69.5067	73.2494
AELQTALAHTQHAAR	3	15	357	34.5805	NA	NA	0.337827	0.333628	34.3496	34.4055	32.5342	36.2767
AEMTCSGILPIDQMR	2	15	358	65.0594	Carbamidomethyl@C	5	0.891989	0.893303	65.1316	65.1487	63.2774	67.02
AENFFILR	2	8	360	64.2911	NA	NA	0.878019	0.897208	65.3464	65.3632	63.492	67.2345
AENIPAVVIEIK	2	12	361	64.6128	NA	NA	0.883869	0.920599	66.6329	66.6481	64.7768	68.5194
AENLQLLTENELHR	2	14	362	55.4164	NA	NA	0.716663	0.714937	55.3215	55.351	53.4798	57.2222
AENLQLLTENELHR	3	14	363	55.4164	NA	NA	0.716663	0.714937	55.3215	55.351	53.4798	57.2222
AENNSEVGASGYGVPGPTWDR	2	21	364	58.4558	NA	NA	0.771923	0.770037	58.3521	58.3777	56.5065	60.2489
AENSSLNLIGK	2	11	366	45.8013	NA	NA	0.541841	0.53721	45.5466	45.5883	43.7171	47.4595
AENYDIPSADR	2	11	367	41.5663	NA	NA	0.464842	0.464227	41.5325	41.5793	39.7081	43.4505
AEPLNSVAH	2	9	368	33.4053	NA	NA	0.316461	0.279502	31.3726	31.4323	29.561	33.3036
AEPSEVDMNSPK	2	12	372	36.0152	NA	NA	0.363913	0.368839	36.2861	36.3396	34.4683	38.2108
AEPVEVVAPR	2	10	373	41.773	NA	NA	0.4686	0.476468	42.2057	42.2517	40.3805	44.1229
AEPYAADEGSGEGHK	2	15	374	26.8144	NA	NA	0.196625	0.187326	26.3029	26.369	24.4976	28.2404
AEPYAADEGSGEGHK	3	15	375	26.8144	NA	NA	0.196625	0.187326	26.3029	26.369	24.4976	28.2404
AEQEEEFISNTLFK	2	14	377	70.563	NA	NA	0.992055	0.976751	69.7213	69.7326	67.8613	71.6039
AEQINQAAGEASAVLAK	2	17	380	55.2258	NA	NA	0.713197	0.704909	54.77	54.8001	52.9289	56.6713
AEQSLHDLQER	2	11	384	32.4372	NA	NA	0.298858	0.295142	32.2328	32.2914	30.4201	34.1627
AEQWNVNYVETSAK	2	14	385	53.6968	NA	NA	0.685397	0.709191	55.0055	55.0354	53.1642	56.9065
AESEEMETSQAGSK	2	14	386	27.3977	NA	NA	0.20723	0.217989	27.9894	28.0533	26.182	29.9247
AESLIGVYPEQGDCVISK	2	18	388	63.5091	Carbamidomethyl@C	14	0.863802	0.865425	63.5984	63.6174	61.7461	65.4886
AESPEEVACR	2	10	389	32.3511	Carbamidomethyl@C	9	0.297292	0.299625	32.4794	32.5376	30.6664	34.4089
AESSDGIHIILK	2	12	390	47.4237	NA	NA	0.571341	0.57361	47.5485	47.5878	45.7166	49.459
AETECQNTEYQQLLDIK	2	17	392	64.4072	Carbamidomethyl@C	5	0.88013	0.900948	65.5521	65.5687	63.6974	67.4399
AETPTAAEDDNEGDKK	2	16	394	25.1341	NA	NA	0.166075	0.182745	26.051	26.1174	24.246	27.9888
AETPTAAEDDNEGDKK	3	16	395	25.1341	NA	NA	0.166075	0.182745	26.051	26.1174	24.246	27.9888
AEVDAEKPGATDR	2	13	398	26.4801	NA	NA	0.190547	0.18209	26.0149	26.0814	24.21	27.9528
AEVDMDTDAPQVSHKPGGEPK	3	21	399	37.2747	NA	NA	0.386813	0.389644	37.4304	37.4825	35.6112	39.3537
AEVLSEEPILK	2	11	400	53.971	NA	NA	0.690382	0.710768	55.0923	55.122	53.2508	56.9932
AFAHITGGGLLENIPR	3	16	413	62.7189	NA	NA	0.849435	0.826844	61.4764	61.4981	59.6269	63.3693
AFALNDLDDYEK	2	12	416	64.4072	NA	NA	0.88013	0.879526	64.3739	64.392	62.5207	66.2632
AFAMIIDK	2	8	417	54.1644	NA	NA	0.693898	0.705459	54.8003	54.8304	52.9592	56.7016
AFAMTNQILVEK	2	12	418	59.5137	NA	NA	0.791158	0.787517	59.3134	59.3378	57.4666	61.2091
AFAMIIDK	2	8	419	45.9579	Oxidation@M	4	0.544688	0.544272	45.935	45.9763	44.1051	47.8474
AFANPEDALR	2	10	420	50.5975	NA	NA	0.629045	0.618787	50.0333	50.0694	48.1982	51.9406
AFAVGVQQVLLK	2	12	421	65.5711	NA	NA	0.901292	0.905554	65.8055	65.8217	63.9504	67.693
AFCTGLDSVLQPYR	2	14	423	70.0737	Carbamidomethyl@C	3	0.983158	0.975503	69.6527	69.664	67.7927	71.5353
AFDCPETEYPVK	2	12	424	49.3498	Carbamidomethyl@C	4	0.60636	0.618055	49.993	50.0292	48.158	51.9004
AFDLFNPNFK	2	10	425	71.5386	NA	NA	1.00979	1.01058	71.5818	71.5908	69.7194	73.4621
AFDLVPPEAVPEQK	2	14	427	64.1068	NA	NA	0.874669	0.856209	63.0915	63.1111	61.2399	64.9824
AFDQGADAIYDHINEGK	3	17	428	56.6101	NA	NA	0.738366	0.730024	56.1513	56.1797	54.3085	58.0509
AFDTAGNGYCR	2	11	431	37.1888	Carbamidomethyl@C	10	0.385251	0.383909	37.115	37.1674	35.2962	39.0387
AFELMHSGK	2	9	433	37.1088	NA	NA	0.383797	0.396811	37.8246	37.8761	36.0049	39.7474
AFEPATGR	2	8	434	30.0669	NA	NA	0.255761	0.249178	29.7048	29.7666	27.8953	31.6379
AFFAGSQR	2	8	436	36.4982	NA	NA	0.372694	0.386262	37.2444	37.2967	35.4254	39.1679
AFFESHPAPSAER	2	13	437	39.4153	NA	NA	0.425733	0.418855	39.037	39.087	37.2158	40.9582
AFFPCFDTPAVK	2	12	438	69.9085	Carbamidomethyl@C	5	0.980155	0.996787	70.8233	70.8332	68.9618	72.7045
AFGFMTR	2	7	441	51.598	NA	NA	0.647236	0.660277	52.3153	52.3485	50.4773	54.2197
AFGGQSLK	2	8	442	31.4293	NA	NA	0.280532	0.283885	31.6137	31.673	29.8017	33.5443
AFGIPIR	2	7	443	53.3509	NA	NA	0.679108	0.682929	53.5611	53.5928	51.7216	55.464
AFGPGLQGGSAGSPAR	2	16	445	43.1176	NA	NA	0.493047	0.492357	43.0797	43.1246	41.2534	44.9958
AFGYYGPLR	2	9	446	55.2258	NA	NA	0.713197	0.740168	56.7092	56.7369	54.8657	58.6081
AFHNEAQVNPER	2	12	447	29.9577	NA	NA	0.253777	0.255667	30.0617	30.123	28.2517	31.9943
AFHPTYEEK	3	9	449	29.4712	NA	NA	0.244931	0.239674	29.1821	29.2445	27.3732	31.1158
AFINLEAAGVGGK	2	13	451	60.094	NA	NA	0.801709	0.803395	60.1867	60.21	58.3388	62.0812
AFITNIPFDVK	2	11	453	71.4072	NA	NA	1.0074	1.02247	72.2356	72.2437	70.3723	74.115
AFLADPSAFVAAAPVAAATTAAPAAAAAPAK	2	31	454	73.135	NA	NA	1.03882	1.03706	73.0381	73.0452	71.1738	74.9166
AFLADPSAFVAAAPVAAATTAAPAAAAAPAK	3	31	455	73.135	NA	NA	1.03882	1.03706	73.0381	73.0452	71.1738	74.9166
AFLDNGPK	2	8	458	37.8581	NA	NA	0.39742	0.399709	37.984	38.0353	36.1641	39.9066
AFLGELK	2	7	459	48.4156	NA	NA	0.589375	0.613048	49.7176	49.7541	47.883	51.6253
AFLIEEQK	2	8	460	46.2429	NA	NA	0.549871	0.550381	46.2709	46.3118	44.4406	48.183
AFLLTPR	2	7	461	51.0131	NA	NA	0.636602	0.651613	51.8387	51.8725	50.0013	53.7437
AFLPLLK	2	7	462	64.764	NA	NA	0.886618	0.892965	65.1131	65.1301	63.2589	67.0014
AFNFGNGLQMLGQK	2	14	466	71.7675	NA	NA	1.01396	1.01422	71.7818	71.7905	69.9191	73.6619
AFNSSSFNSNTFLTR	2	15	468	62.0753	NA	NA	0.837732	0.816704	60.9187	60.9411	59.0699	62.8123
AFPMPGFDEH	2	10	469	63.803	NA	NA	0.869146	0.862184	63.4201	63.4393	61.5681	65.3106
AFQYVETHGEVCPANWTPDSPTIK	2	24	470	63.1856	Carbamidomethyl@C	12	0.85792	0.853987	62.9693	62.989	61.1178	64.8603
AFQYVETHGEVCPANWTPDSPTIK	3	24	471	63.2132	Carbamidomethyl@C	12	0.858422	0.853987	62.9693	62.989	61.1178	64.8603
AFSQFGK	2	7	475	35.4357	NA	NA	0.353377	0.373849	36.5617	36.6148	34.7436	38.4861
AFSVNIFK	2	8	476	61.9803	NA	NA	0.836005	0.807274	60.4001	60.4231	58.5519	62.2944
AFSYYGPLR	2	9	477	54.9276	NA	NA	0.707775	0.743164	56.874	56.9015	55.0303	58.7727
AFTELQAK	2	8	478	37.6693	NA	NA	0.393988	0.390062	37.4534	37.5054	35.6342	39.3766
AFTHTAQYDEAISDYFR	3	17	479	64.2911	NA	NA	0.878019	0.876732	64.2203	64.2385	62.3672	66.1097
AFTMDCITLEGDQVSHR	2	17	481	60.6475	Carbamidomethyl@C	6	0.811773	0.810831	60.5957	60.6185	58.7473	62.4897
AFTYINLDK	2	9	482	55.8771	NA	NA	0.725039	0.726885	55.9787	56.0073	54.1361	57.8785
AFVAIGDYNGHVGLGVK	2	17	483	60.1837	NA	NA	0.803339	0.797624	59.8693	59.8931	58.0218	61.7643
AFVAIGDYNGHVGLGVK	3	17	484	60.1837	NA	NA	0.803339	0.797624	59.8693	59.8931	58.0218	61.7643
AFVDFLSDEIK	2	11	485	73.1556	NA	NA	1.03919	1.03556	72.9557	72.9629	71.0915	74.8342
AFVHWYVGEGMEEGEFSEAR	2	20	486	68.0054	NA	NA	0.945553	0.947967	68.1382	68.1515	66.2802	70.0228
AFVHWYVGEGMEEGEFSEAR	3	20	487	68.036	NA	NA	0.94611	0.947967	68.1382	68.1515	66.2802	70.0228
AFVTDWDK	2	8	488	52.4143	NA	NA	0.662078	0.663342	52.4838	52.5168	50.6456	54.388
AFYECLAACEGSR	2	13	489	53.9393	Carbamidomethyl@C;Carbamidomethyl@C	5;9	0.689806	0.666629	52.6646	52.6974	50.8262	54.5686
AGAFDQLK	2	8	496	40.4059	NA	NA	0.443744	0.432201	39.7711	39.8202	37.9489	41.6914
AGAGDFMR	2	8	497	38.0437	NA	NA	0.400795	0.357438	35.6591	35.7133	33.8421	37.5846
AGAGSATLSMAYAGAR	2	16	498	49.5405	NA	NA	0.609827	0.610906	49.5998	49.6365	47.7653	51.5077
AGAHLQGGAK	2	10	499	18.2109	NA	NA	0.0401982	0.0894959	20.9223	20.9951	19.1237	22.8666
AGAIAPCEVTVPAQNTGLGPEK	2	22	500	57.3165	Carbamidomethyl@C	7	0.751209	0.749544	57.2249	57.2519	55.3807	59.1231
AGAIAPCEVTVPAQNTGLGPEK	3	22	501	57.2879	Carbamidomethyl@C	7	0.750689	0.749544	57.2249	57.2519	55.3807	59.1231
AGAISASGPELQGAGHSK	2	18	502	35.4675	NA	NA	0.353954	0.356629	35.6146	35.6689	33.7977	37.5402
AGAISASGPELQGAGHSK	3	18	503	35.4675	NA	NA	0.353954	0.356629	35.6146	35.6689	33.7977	37.5402
AGDEFVEK	2	8	506	31.0939	NA	NA	0.274434	0.284351	31.6393	31.6986	29.8273	33.57
AGDISCNADINPLK	2	14	507	51.5467	Carbamidomethyl@C	6	0.646304	0.641295	51.2712	51.3058	49.4346	53.177
AGDLLEDSPK	2	10	508	41.1676	NA	NA	0.457593	0.464879	41.5683	41.6151	39.7439	43.4863
AGDMENAENILTVMR	2	15	509	70.4022	NA	NA	0.98913	1.00874	71.4806	71.4896	69.6183	73.361
AGDTVIPLYIPQCGECK	2	17	510	68.1578	Carbamidomethyl@C;Carbamidomethyl@C	13;16	0.948324	0.951298	68.3214	68.3344	66.4631	70.2058
AGDWQCPNPGCGNQNFAWR	2	19	511	61.1091	Carbamidomethyl@C;Carbamidomethyl@C	6;11	0.820165	0.818194	61.0007	61.023	59.1517	62.8942
AGEAPTENPAPPTQQSSAE	2	19	512	41.3648	NA	NA	0.461179	0.421891	39.204	39.2538	37.3826	41.125
AGELTEDEVER	2	11	514	37.9909	NA	NA	0.399835	0.392651	37.5958	37.6476	35.7764	39.5189
AGEVFIHK	2	8	515	30.5752	NA	NA	0.265004	0.272134	30.9674	31.0276	29.1562	32.8989
AGFAGDDAPR	2	10	517	32.9508	NA	NA	0.308196	0.309621	33.0292	33.0868	31.2155	34.958
AGFDSDYDQALADIR	2	15	518	68.9104	NA	NA	0.962007	0.93716	67.5438	67.5578	65.6865	69.4291
AGFLDLK	2	7	519	54.3578	NA	NA	0.697414	0.725417	55.8979	55.9266	54.0554	57.7978
AGFRPVEAGGQHGGR	3	15	520	26.9138	NA	NA	0.198433	0.213701	27.7535	27.8178	25.9464	29.6891
AGFVPVYLR	2	9	521	59.9869	NA	NA	0.799761	0.828236	61.553	61.5746	59.7033	63.4458
AGGAAVVITEPEHTK	2	15	522	36.4235	NA	NA	0.371336	0.374072	36.574	36.6271	34.7558	38.4983
AGGANYDAQTE	2	11	524	31.0101	NA	NA	0.272911	0.259705	30.2838	30.3448	28.4735	32.2162
AGGEAGVTLGQPHLSR	2	16	525	42.1804	NA	NA	0.476007	0.473968	42.0682	42.1144	40.2432	43.9856
AGGEEEDDDDEAAGGR	2	16	526	26.4449	NA	NA	0.189907	0.210821	27.5952	27.6596	25.7883	29.531
AGGEELDEGVAK	2	12	527	34.9114	NA	NA	0.343843	0.354653	35.5059	35.5604	33.6891	37.4316
AGGFLMK	2	7	528	39.8588	NA	NA	0.433796	0.433483	39.8416	39.8906	38.0193	41.7618
AGGFVVGYTSSGNPIFR	2	17	529	66.3278	NA	NA	0.91505	0.949221	68.2072	68.2204	66.3491	70.0917
AGGGPTLQCPPPSSPEK	2	17	530	39.548	Carbamidomethyl@C	9	0.428146	0.421758	39.1967	39.2465	37.3753	41.1177
AGGIETIANEYSDR	2	14	532	54.1373	NA	NA	0.693405	0.702225	54.6224	54.6527	52.7815	56.5239
AGGSPAPGPETPAISPSK	2	18	534	42.2923	NA	NA	0.478042	0.475645	42.1605	42.2066	40.3354	44.0778
AGIFQSVK	2	8	535	41.8812	NA	NA	0.470567	0.490287	42.9658	43.0108	41.1396	44.882
AGIIASAR	2	8	536	30.438	NA	NA	0.262509	0.263025	30.4664	30.5272	28.6559	32.3985
AGIISTVEVLK	2	11	537	61.2861	NA	NA	0.823384	0.827882	61.5335	61.5551	59.6839	63.4263
AGIPVYAWK	2	9	538	57.1463	NA	NA	0.748115	0.74223	56.8227	56.8502	54.979	58.7214
AGKPVICATQMLESMIK	2	17	539	72.9876	Carbamidomethyl@C	7	1.03614	1.01144	71.6291	71.638	69.7666	73.5093
AGKPVICATQMLESMIK	3	17	540	72.9665	Carbamidomethyl@C	7	1.03575	1.01144	71.6291	71.638	69.7666	73.5093
AGKPVICATQMLESMIK	3	17	541	59.753	Carbamidomethyl@C;Oxidation@M	7;15	0.79551	0.801885	60.1037	60.1271	58.2559	61.9983
AGKPVICATQMLESMIK	3	17	542	63.1856	Carbamidomethyl@C;Oxidation@M	7;11	0.85792	0.851703	62.8437	62.8636	60.9924	64.7349
AGLAPLEVR	2	9	543	48.3848	NA	NA	0.588815	0.591015	48.5058	48.5439	46.6727	50.4151
AGLGSGLSLSGLVHPELSR	2	19	544	69.059	NA	NA	0.964708	0.964076	69.0242	69.0363	67.165	70.9076
AGLGSGLSLSGLVHPELSR	3	19	545	69.0293	NA	NA	0.964169	0.964076	69.0242	69.0363	67.165	70.9076
AGLLEPEVFHLNPAK	3	15	546	63.9513	NA	NA	0.871842	0.923235	66.7779	66.7929	64.9216	68.6642
AGLNCSTENMPIK	2	13	547	45.3133	Carbamidomethyl@C	5	0.532969	0.520673	44.637	44.6799	42.8087	46.5511
AGLNCSTENMPIK	2	13	548	35.8523	Carbamidomethyl@C;Oxidation@M	5;10	0.360951	0.372185	36.4702	36.5234	34.6521	38.3946
AGLQFPVGR	2	9	550	52.0824	NA	NA	0.656043	0.656647	52.1156	52.1491	50.2779	54.0203
AGLSPANCQSDR	2	12	552	29.6431	Carbamidomethyl@C	8	0.248056	0.252161	29.8689	29.9304	28.0591	31.8018
AGLSQSLFER	2	10	553	53.3752	NA	NA	0.679549	0.66722	52.6971	52.7298	50.8587	54.601
AGLVDDFEK	2	9	554	50.5975	NA	NA	0.629045	0.63202	50.7611	50.7963	48.9251	52.6675
AGLVGPEFHEK	3	11	556	39.1424	NA	NA	0.420771	0.440048	40.2026	40.2512	38.38	42.1224
AGLVIGK	2	7	557	34.6659	NA	NA	0.339381	0.350892	35.299	35.3538	33.4825	37.225
AGNASKDEIDSAVK	2	14	558	29.8622	NA	NA	0.25204	0.265369	30.5953	30.656	28.7847	32.5273
AGNLGGGVVTIER	2	13	559	47.6694	NA	NA	0.575808	0.573343	47.5339	47.5731	45.702	49.4443
AGNNMLLVGVHGPR	3	14	560	47.7831	NA	NA	0.577875	0.556681	46.6174	46.6579	44.7867	48.5291
AGPESDAQYQFTGIK	2	15	561	53.2426	NA	NA	0.677138	0.677621	53.2691	53.3012	51.43	55.1724
AGPGTLSVTIEGPSK	2	15	562	52.0245	NA	NA	0.654991	0.650008	51.7505	51.7844	49.9132	53.6556
AGPIWDLR	2	8	563	58.3758	NA	NA	0.770469	0.767407	58.2074	58.2332	56.362	60.1044
AGPNASIISLK	2	11	564	49.871	NA	NA	0.615837	0.6145	49.7975	49.8339	47.9627	51.7051
AGQAVDDFIEK	2	11	565	48.1473	NA	NA	0.584496	0.57678	47.7229	47.7619	45.8907	49.6331
AGQCVIGLQMGTNK	2	14	566	50.8202	Carbamidomethyl@C	4	0.633095	0.622788	50.2533	50.2892	48.418	52.1604
AGQSAAGAAPGGGVDTR	2	17	570	30.4974	NA	NA	0.26359	0.265475	30.6011	30.6618	28.7904	32.5331
AGQVVTIWAAGAGATHSPPTDLVWK	2	25	572	72.4939	NA	NA	1.02716	1.02449	72.3469	72.3548	70.4835	74.2262
AGSNMLLIGVHGPTTPCEEVSMK	3	23	575	62.6292	Carbamidomethyl@C	17	0.847803	0.848236	62.653	62.6732	60.8019	64.5444
AGSSTPGDAPPAVAEVQGR	2	19	576	45.0216	NA	NA	0.527665	0.532827	45.3055	45.3476	43.4764	47.2188
AGTEDEEEEEEGRR	2	14	579	25.4499	NA	NA	0.171816	0.2018	27.099	27.1641	25.2927	29.0354
AGTEDEEEEEEGRR	3	14	580	25.4855	NA	NA	0.172463	0.2018	27.099	27.1641	25.2927	29.0354
AGTGVDNVDLEAATR	2	15	581	49.0706	NA	NA	0.601283	0.601989	49.1094	49.1467	47.2755	51.0179
AGTQIENIDEDFR	2	13	585	56.3292	NA	NA	0.733258	0.743385	56.8862	56.9136	55.0424	58.7848
AGTQIENIDEDFRDGLK	3	17	586	60.5625	NA	NA	0.810227	0.815552	60.8553	60.8778	59.0066	62.749
AGTQIENIEEDFR	2	13	587	61.8654	NA	NA	0.833916	0.820694	61.1382	61.1603	59.2891	63.0315
AGTQIENIEEDFRDGLK	3	17	588	68.1578	NA	NA	0.948324	0.90792	65.9356	65.9516	64.0803	67.8229
AGVAAPATQVAQVTLQSVQR	2	20	589	64.8543	NA	NA	0.888259	0.892036	65.062	65.0791	63.2079	66.9504
AGVAAPATQVAQVTLQSVQR	3	20	590	64.7931	NA	NA	0.887148	0.892036	65.062	65.0791	63.2079	66.9504
AGVAPLQVK	2	9	591	38.8701	NA	NA	0.41582	0.401739	38.0956	38.1468	36.2756	40.018
AGVIFPVGR	2	9	593	52.825	NA	NA	0.669546	0.670425	52.8734	52.9059	51.0347	54.7771
AGVNTVTTLVENK	2	13	596	51.462	NA	NA	0.644763	0.644545	51.45	51.4843	49.6131	53.3555
AGVNTVTTLVENKK	2	14	597	44.2611	NA	NA	0.513839	0.516041	44.3823	44.4255	42.5543	46.2967
AGVNTVTTLVENKK	3	14	598	44.29	NA	NA	0.514364	0.516041	44.3823	44.4255	42.5543	46.2967
AGVQADEDEDGDEK	2	14	599	27.462	NA	NA	0.2084	0.224413	28.3427	28.4062	26.5349	30.2776
AGVVGPELHEQLLSAEK	2	17	601	53.0275	NA	NA	0.673227	0.666719	52.6695	52.7023	50.8311	54.5735
AGVVGPELHEQLLSAEK	3	17	602	53.0275	NA	NA	0.673227	0.666719	52.6695	52.7023	50.8311	54.5735
AGVVTPGITEDQLWR	2	15	603	66.5444	NA	NA	0.918989	0.934485	67.3967	67.4109	65.5396	69.2822
AGYPQYVSEILEK	2	13	606	68.3763	NA	NA	0.952297	0.940316	67.7174	67.7312	65.8599	69.6025
AHAAQVTCVAASPHK	2	15	607	26.1031	Carbamidomethyl@C	8	0.183692	0.192792	26.6035	26.6692	24.7979	28.5406
AHAAQVTCVAASPHK	3	15	608	26.1031	Carbamidomethyl@C	8	0.183692	0.192792	26.6035	26.6692	24.7979	28.5406
AHAGSTMPSVVK	2	12	609	30.291	NA	NA	0.259836	0.261106	30.3608	30.4218	28.5505	32.2931
AHAWPSPYK	2	9	610	36.0152	NA	NA	0.363913	0.340754	34.7415	34.7969	32.9256	36.6681
AHDGGIYAISWSPDSTHLLSASGDK	3	25	611	65.3369	NA	NA	0.897034	0.898332	65.4083	65.425	63.5537	67.2963
AHDGGIYAISWSPDSTHLLSASGDK	4	25	612	65.3682	NA	NA	0.897603	0.898332	65.4083	65.425	63.5537	67.2963
AHEILPNLVCCSAK	3	14	614	50.5975	Carbamidomethyl@C;Carbamidomethyl@C	10;11	0.629045	0.615587	49.8573	49.8936	48.0224	51.7648
AHEWMFPV	2	8	615	68.6566	NA	NA	0.957393	0.886876	64.7782	64.7957	62.9245	66.667
AHFQNFPNGVTDFIK	2	15	616	63.3872	NA	NA	0.861586	0.843095	62.3702	62.3908	60.5196	64.262
AHGPGLEGGLVGK	2	13	620	37.0818	NA	NA	0.383306	0.381234	36.9679	37.0205	35.1493	38.8917
AHGPGLEGGLVGK	3	13	621	37.0818	NA	NA	0.383306	0.381234	36.9679	37.0205	35.1493	38.8917
AHGPGLEGGLVGKPAEFTIDTK	3	22	622	55.0108	NA	NA	0.709287	0.70753	54.9142	54.9441	53.0729	56.8153
AHGPGLEGGLVGKPAEFTIDTK	4	22	623	54.9829	NA	NA	0.708779	0.70753	54.9142	54.9441	53.0729	56.8153
AHIANPSGASTECFVTDNADGTYQVEYTPFEK	3	32	624	66.6037	Carbamidomethyl@C	13	0.920067	0.920688	66.6378	66.653	64.7817	68.5243
AHLMEIQVNGGTVAEK	2	16	625	48.0342	NA	NA	0.582439	0.580868	47.9477	47.9865	46.1153	49.8577
AHLMEIQVNGGTVAEK	2	16	627	41.275	Oxidation@M	4	0.459545	0.452467	40.8857	40.9334	39.0621	42.8046
AHLMEIQVNGGTVAEK	3	16	628	41.1428	Oxidation@M	4	0.457141	0.452467	40.8857	40.9334	39.0621	42.8046
AHLSENELEALEK	2	13	629	47.7568	NA	NA	0.577396	0.580235	47.9129	47.9517	46.0805	49.8229
AHLTNQYMQR	3	10	630	30.7217	NA	NA	0.267667	0.254101	29.9755	30.037	28.1657	31.9083
AHQLVMEGYNWCHDR	3	15	632	46.4122	Carbamidomethyl@C	12	0.552949	0.545913	46.0252	46.0664	44.1952	47.9376
AHQVVEDGYEFFAK	2	14	633	55.7109	NA	NA	0.722017	0.727433	56.0088	56.0374	54.1662	57.9086
AHQVVEDGYEFFAK	3	14	634	55.7109	NA	NA	0.722017	0.727433	56.0088	56.0374	54.1662	57.9086
AHSGAQGLLAAQK	2	13	635	30.4693	NA	NA	0.263078	0.255324	30.0428	30.1042	28.2329	31.9755
AHSIQIMK	2	8	636	29.6431	NA	NA	0.248056	0.248345	29.659	29.7208	27.8495	31.5921
AHSSMVGVNLPQK	2	13	637	39.3318	NA	NA	0.424215	0.424315	39.3373	39.3869	37.5157	41.2582
AHSSMVGVNLPQK	3	13	638	39.3318	NA	NA	0.424215	0.424315	39.3373	39.3869	37.5157	41.2582
AHSSMVGVNLPQK	2	13	639	33.7576	Oxidation@M	5	0.322866	0.329667	34.1317	34.1879	32.3166	36.0592
AHSSMVGVNLPQK	3	13	640	33.7576	Oxidation@M	5	0.322866	0.329667	34.1317	34.1879	32.3166	36.0592
AHTMTDDVTFWK	3	12	642	55.0108	NA	NA	0.709287	0.706709	54.869	54.899	53.0278	56.7702
AHTSPAPAPRPTPR	3	14	643	24.1078	NA	NA	0.147414	0.155008	24.5254	24.5938	22.7223	26.4652
AHVQEVAQHNLK	2	12	644	25.6211	NA	NA	0.174929	0.171742	25.4458	25.513	23.6416	27.3844
AHVQEVAQHNLK	3	12	645	25.6211	NA	NA	0.174929	0.171742	25.4458	25.513	23.6416	27.3844
AHVVPCFDASK	3	11	648	37.9909	Carbamidomethyl@C	6	0.399835	0.391659	37.5412	37.5931	35.7219	39.4644
AIADTGANVVVTGGK	2	15	650	45.0216	NA	NA	0.527665	0.528166	45.0491	45.0915	43.2203	46.9627
AIADWYNEK	2	9	651	50.6244	NA	NA	0.629535	0.603894	49.2142	49.2513	47.3801	51.1225
AIAELGIYPAVDPLDSTSR	2	19	652	73.1147	NA	NA	1.03845	1.0434	73.3868	73.3934	71.522	75.2648
AIAFLQQPR	2	9	654	52.7174	NA	NA	0.667589	0.670432	52.8738	52.9063	51.0351	54.7775
AIAIASDMQDDFISPCGACR	2	20	655	70.0076	Carbamidomethyl@C;Carbamidomethyl@C	16;19	0.981957	0.991641	70.5403	70.5505	68.6792	72.4218
AIDDNMSLDEIEK	2	13	657	58.5914	NA	NA	0.774389	0.761688	57.8928	57.919	56.0478	59.7902
AIDDNMSLDEIEK	2	13	658	50.0167	Oxidation@M	6	0.618486	0.605797	49.3188	49.3558	47.4847	51.227
AIDLFTDAIK	2	10	659	67.4451	NA	NA	0.935366	0.935826	67.4704	67.4845	65.6132	69.3558
AIDTTQLFSLPK	2	12	661	70.8166	NA	NA	0.996665	0.95146	68.3303	68.3434	66.472	70.2147
AIEDEGGNPDEIEITSEGNK	2	20	663	52.2214	NA	NA	0.65857	0.641985	51.3092	51.3437	49.4725	53.2148
AIEENNNFSK	2	10	665	31.7249	NA	NA	0.285908	0.273039	31.0171	31.0772	29.2059	32.9486
AIEGFNQSSHQK	2	12	667	28.2566	NA	NA	0.222847	0.231996	28.7598	28.8228	26.9514	30.6941
AIEHADGGVAAGVAVLDNPYPV	2	22	668	72.8578	NA	NA	1.03378	1.00875	71.4813	71.4903	69.619	73.3617
AIELLQEFSDQHPENAAEIK	3	20	670	67.66	NA	NA	0.939273	0.93826	67.6043	67.6183	65.747	69.4896
AIEMLGGELGSK	2	12	671	55.9674	NA	NA	0.726679	0.725755	55.9165	55.9452	54.074	57.8164
AIENTASVSEHK	2	12	673	26.6818	NA	NA	0.194215	0.196046	26.7825	26.848	24.9766	28.7194
AIEPNDYTGK	2	10	674	35.5996	NA	NA	0.356356	0.367041	36.1872	36.2408	34.3696	38.1121
AIEPPPLDAVIEAEHTLR	3	18	676	73.0103	NA	NA	1.03655	1.03909	73.1497	73.1566	71.2853	75.028
AIEQADLLQEEDESPR	2	16	677	54.4943	NA	NA	0.699897	0.701345	54.574	54.6044	52.7332	56.4755
AIFAGYK	2	7	678	41.7447	NA	NA	0.468086	0.478828	42.3355	42.3814	40.5102	44.2526
AIFQTIQNR	2	9	679	46.1608	NA	NA	0.548379	0.561918	46.9055	46.9455	45.0744	48.8167
AIGDHFYK	2	8	681	35.6292	NA	NA	0.356894	0.349307	35.2119	35.2667	33.3955	37.138
AIGSASEGAQSSLQEVYHK	2	19	683	46.6019	NA	NA	0.556398	0.554772	46.5125	46.553	44.6819	48.4242
AIGSASEGAQSSLQEVYHK	3	19	684	46.5734	NA	NA	0.555879	0.554772	46.5125	46.553	44.6819	48.4242
AIGVKPPR	2	8	686	28.1089	NA	NA	0.220161	0.206062	27.3334	27.3982	25.5268	29.2695
AIGVLTSGGDAQGMNAAVR	2	19	687	54.8787	NA	NA	0.706885	0.706268	54.8447	54.8748	53.0036	56.746
AIHNIFR	2	7	688	44.9991	NA	NA	0.527257	0.34259	34.8425	34.8977	33.0265	36.769
AIHSWLTR	3	8	690	39.279	NA	NA	0.423254	0.409564	38.526	38.5767	36.7054	40.4479
AIIEEYLHLNDMK	2	13	691	66.2963	NA	NA	0.914479	0.934782	67.413	67.4272	65.5559	69.2985
AIIEEYLHLNDMK	2	13	692	61.4929	Oxidation@M	12	0.827143	0.809031	60.4967	60.5196	58.6484	62.3909
AIILAAAPGEK	2	11	694	46.804	NA	NA	0.560073	0.54843	46.1637	46.2047	44.3335	48.0758
AIITALGVER	2	10	695	53.9115	NA	NA	0.6893	0.697274	54.3501	54.3808	52.5096	56.252
AILGSVER	2	8	696	38.5431	NA	NA	0.409874	0.411355	38.6245	38.6751	36.8038	40.5463
AILPCIK	2	7	698	48.9577	Carbamidomethyl@C	5	0.599231	0.598276	48.9052	48.9427	47.0716	50.8139
AILQENGCLSDSDMFSQAGLR	2	21	700	70.8828	Carbamidomethyl@C	8	0.997869	1.00038	71.0207	71.0303	69.1589	72.9016
AILVDLEPGTMDSVR	2	15	701	68.9104	NA	NA	0.962007	0.960961	68.8528	68.8652	66.9939	70.7365
AILVDLEPGTMDSVR	3	15	702	68.9104	NA	NA	0.962007	0.960961	68.8528	68.8652	66.9939	70.7365
AILVDLEPGTMDSVR	2	15	703	62.3075	Oxidation@M	11	0.841954	0.853211	62.9266	62.9464	61.0752	64.8177
AINCATSGVVGLVNCLR	2	17	704	70.6911	Carbamidomethyl@C;Carbamidomethyl@C	4;15	0.994384	0.983522	70.0937	70.1045	68.2332	71.9758
AINCATSGVVGLVNCLR	3	17	705	70.7235	Carbamidomethyl@C;Carbamidomethyl@C	4;15	0.994974	0.983522	70.0937	70.1045	68.2332	71.9758
AINPINTFTK	2	10	706	52.3638	NA	NA	0.661159	0.675274	53.1401	53.1723	51.3011	55.0435
AINQGGLTSVAVR	2	13	707	46.4122	NA	NA	0.552949	0.557295	46.6512	46.6916	44.8204	48.5628
AINTLNGLR	2	9	708	42.8875	NA	NA	0.488864	0.480591	42.4325	42.4782	40.607	44.3494
AINVLLEGNPDTHSWEMVGK	2	20	709	68.0054	NA	NA	0.945553	0.941782	67.798	67.8117	65.9404	69.683
AIPQLQGYLR	2	10	712	60.1562	NA	NA	0.80284	0.812354	60.6795	60.7022	58.831	62.5734
AIPTVNHSGTFSPQAPVPTTVPVVDVR	3	27	713	66.2647	NA	NA	0.913903	0.915008	66.3254	66.341	64.4697	68.2123
AIQAELLK	2	8	714	46.5446	NA	NA	0.555357	0.536827	45.5255	45.5673	43.6961	47.4385
AIQCVNNVVVDGR	2	13	715	46.111	Carbamidomethyl@C	4	0.547473	0.55418	46.4799	46.5205	44.6493	48.3917
AIQDHLLEVEQSK	2	13	717	48.8463	NA	NA	0.597205	0.553317	46.4324	46.4731	44.6019	48.3443
AIQDPAFSDGIR	2	12	719	51.5714	NA	NA	0.646752	0.65928	52.2604	52.2937	50.4225	54.1649
AIQGGTSHHLGQNFSK	2	16	720	29.3874	NA	NA	0.243408	0.223994	28.3197	28.3832	26.5118	30.2545
AIQGGTSHHLGQNFSK	3	16	721	29.3874	NA	NA	0.243408	0.223994	28.3197	28.3832	26.5118	30.2545
AIQGGTSHHLGQNFSK	4	16	722	29.3874	NA	NA	0.243408	0.223994	28.3197	28.3832	26.5118	30.2545
AIQLSGAEQLEALK	2	14	723	62.422	NA	NA	0.844036	0.852929	62.9111	62.931	61.0597	64.8022
AIRPQIDLK	2	9	724	39.2504	NA	NA	0.422734	0.418295	39.0062	39.0563	37.185	40.9275
AIRPQIDLK	3	9	725	39.2504	NA	NA	0.422734	0.418295	39.0062	39.0563	37.185	40.9275
AISAANLHLR	2	10	726	41.1932	NA	NA	0.458059	0.447253	40.5989	40.6469	38.7757	42.5181
AISHEHSPSDLEAHFVPLVK	4	20	728	52.3888	NA	NA	0.661614	0.655738	52.0656	52.0991	50.2279	53.9703
AISSYFVSTMSSSIK	2	15	731	68.6251	NA	NA	0.95682	0.985937	70.2265	70.2372	68.3658	72.1085
AITAMGFK	2	8	732	45.4462	NA	NA	0.535386	0.54232	45.8276	45.869	43.9978	47.7402
AITEASPAH	2	9	733	27.5798	NA	NA	0.210542	0.192219	26.572	26.6378	24.7664	28.5092
AITGASLADIMAK	2	13	734	64.046	NA	NA	0.873563	0.891569	65.0363	65.0535	63.1822	66.9247
AITGASLADIMAK	2	13	735	52.7174	Oxidation@M	11	0.667589	0.66526	52.5893	52.6222	50.751	54.4934
AITHLNNNFMFGQK	2	14	736	52.6637	NA	NA	0.666613	0.670388	52.8713	52.9039	51.0327	54.775
AITHLNNNFMFGQK	3	14	737	52.6889	NA	NA	0.667071	0.670388	52.8713	52.9039	51.0327	54.775
AITIAGVPQSVTECVK	2	16	739	61.6375	Carbamidomethyl@C	14	0.829773	0.809592	60.5276	60.5504	58.6792	62.4217
AITIANQTNCPLYITK	2	16	740	59.3607	Carbamidomethyl@C	10	0.788376	0.783931	59.1162	59.1409	57.2697	61.0121
AITVFSPDGHLFQVEYAQEAVK	3	22	741	72.9665	NA	NA	1.03575	1.03133	72.7234	72.7309	70.8595	74.6022
AIVAGDQNVEYK	2	12	742	40.764	NA	NA	0.450254	0.428394	39.5617	39.611	37.7398	41.4823
AIVAIENPADVSVISSR	2	17	743	66.45	NA	NA	0.917273	0.932426	67.2834	67.2978	65.4265	69.1691
AIVAIENPADVSVISSR	3	17	744	66.45	NA	NA	0.917273	0.932426	67.2834	67.2978	65.4265	69.1691
AIVDALPPPCESACTVPTDVDK	2	22	745	63.0998	Carbamidomethyl@C;Carbamidomethyl@C	10;14	0.856359	0.858539	63.2196	63.2391	61.3679	65.1104
AIVDALPPPCESACTVPTDVDK	3	22	746	63.1582	Carbamidomethyl@C;Carbamidomethyl@C	10;14	0.857421	0.858539	63.2196	63.2391	61.3679	65.1104
AIVDCGFEHPSEVQHECIPQAILGMDVLCQAK	4	32	748	72.9876	Carbamidomethyl@C;Carbamidomethyl@C;Carbamidomethyl@C	5;17;29	1.03614	1.03386	72.8621	72.8694	70.998	74.7408
AIVDGNLK	2	8	749	36.2516	NA	NA	0.368211	0.368844	36.2864	36.3399	34.4687	38.2112
AIVICPTDEDLK	2	12	750	53.8344	Carbamidomethyl@C	5	0.687898	0.678867	53.3377	53.3697	51.4985	55.2408
AIVQQWLEYR	2	10	751	65.6663	NA	NA	0.903024	0.909022	65.9962	66.0122	64.1409	67.8835
AIYDTPCIQAESEK	2	14	753	50.6791	Carbamidomethyl@C	7	0.630529	0.604881	49.2685	49.3055	47.4344	51.1767
AKPAEAPAAAAPK	2	13	755	25.346	NA	NA	0.169927	0.182784	26.0531	26.1195	24.2481	27.9909
AKPAEAPAAAAPK	3	13	756	25.346	NA	NA	0.169927	0.182784	26.0531	26.1195	24.2481	27.9909
AKPVPWVEK	2	9	757	35.5996	NA	NA	0.356356	0.361194	35.8657	35.9197	34.0484	37.791
AKPYEGSILEADCDILIPAASEK	2	23	758	68.6881	Carbamidomethyl@C	13	0.957966	0.95861	68.7235	68.7361	66.8648	70.6074
AKPYEGSILEADCDILIPAASEK	3	23	759	68.7204	Carbamidomethyl@C	13	0.958552	0.95861	68.7235	68.7361	66.8648	70.6074
ALAAAGYDVEK	2	11	760	41.275	NA	NA	0.459545	0.461701	41.3935	41.4406	39.5694	43.3118
ALAAFLK	2	7	761	50.7335	NA	NA	0.631518	0.660599	52.333	52.3662	50.495	54.2374
ALAAGGVGSIVR	2	12	762	47.6159	NA	NA	0.574835	0.582195	48.0207	48.0594	46.1882	49.9306
ALAAGGYDVEK	2	11	763	39.8871	NA	NA	0.43431	0.433896	39.8643	39.9133	38.042	41.7845
ALAAPAAEEK	2	10	764	30.5231	NA	NA	0.264055	0.255305	30.0418	30.1031	28.2318	31.9745
ALAAQLPVLPR	2	11	765	61.4013	NA	NA	0.825478	0.850858	62.7972	62.8172	60.946	64.6884
ALAAQNIVEDMEQR	2	14	766	64.9091	NA	NA	0.889256	0.87542	64.1481	64.1664	62.2952	66.0377
ALADENEFVR	2	10	767	47.7284	NA	NA	0.57688	0.571345	47.424	47.4634	45.5922	49.3346
ALADHSMAQTPR	3	12	768	26.1369	Oxidation@M	7	0.184308	0.194528	26.699	26.7646	24.8932	28.636
ALADVATVLGR	2	11	769	61.8066	NA	NA	0.832846	0.844283	62.4356	62.456	60.5848	64.3273
ALAESWNAAFLESSAK	2	16	770	68.8465	NA	NA	0.960846	0.975417	69.6479	69.6593	67.788	71.5306
ALAGCDFLTISPK	2	13	771	65.0278	Carbamidomethyl@C	5	0.891415	0.896054	65.283	65.2998	63.4286	67.1711
ALAIEEFCK	2	9	772	54.4411	Carbamidomethyl@C	8	0.698929	0.690918	54.0005	54.0316	52.1604	55.9028
ALALDCEMVGVGPK	2	14	773	60.8403	Carbamidomethyl@C	6	0.815279	0.831918	61.7555	61.7768	59.9056	63.648
ALANSLACQGK	2	11	774	34.9394	Carbamidomethyl@C	8	0.344353	0.354906	35.5198	35.5743	33.703	37.4455
ALAPEYAK	2	8	777	32.8969	NA	NA	0.307217	0.326774	33.9726	34.029	32.1577	35.9002
ALASILLQDHIR	2	12	780	59.0161	NA	NA	0.782111	0.778163	58.799	58.824	56.9528	60.6952
ALASQLQDSLK	2	11	781	50.1324	NA	NA	0.620589	0.638105	51.0958	51.1305	49.2594	53.0017
ALAVGGLGSIIR	2	12	782	65.0894	NA	NA	0.892535	0.917892	66.4841	66.4994	64.6281	68.3707
ALAVVYGPHEIR	2	12	783	45.7739	NA	NA	0.541343	0.541898	45.8044	45.8459	43.9747	47.717
ALCDLGPWVK	2	10	785	62.8029	Carbamidomethyl@C	3	0.850962	0.853637	62.95	62.9698	61.0986	64.8411
ALCDPLEEVR	2	10	787	56.3292	Carbamidomethyl@C	3	0.733258	0.734105	56.3758	56.4039	54.5327	58.2751
ALCDVGTAISCSR	2	13	788	48.5022	Carbamidomethyl@C;Carbamidomethyl@C	3;11	0.590949	0.589727	48.435	48.4731	46.6019	50.3443
ALCQITDSTMLQAIER	2	16	789	71.9689	Carbamidomethyl@C	3	1.01762	1.00269	71.1481	71.1576	69.2862	73.0289
ALCYLVLK	2	8	790	58.0436	Carbamidomethyl@C	3	0.764428	0.773563	58.546	58.5714	56.7002	60.4426
ALDDISESIK	2	10	792	49.871	NA	NA	0.615837	0.601285	49.0707	49.108	47.2369	50.9792
ALDDMISTLK	2	10	793	63.0998	NA	NA	0.856359	0.852297	62.8763	62.8962	61.025	64.7675
ALDEGDIALLK	2	11	794	61.6101	NA	NA	0.829274	0.834316	61.8874	61.9085	60.0373	63.7798
ALDIAENEMPGLMR	2	14	796	67.9713	NA	NA	0.944932	0.940251	67.7138	67.7276	65.8563	69.5989
ALDIPLVK	2	8	797	58.6207	NA	NA	0.774921	0.772825	58.5054	58.5308	56.6596	60.402
ALDLDSSCK	2	9	798	35.9598	Carbamidomethyl@C	8	0.362905	0.368391	36.2615	36.315	34.4437	38.1862
ALDLNLK	2	7	802	47.8657	NA	NA	0.579376	0.57863	47.8246	47.8636	45.9924	49.7347
ALDTMNFDVIK	2	11	806	57.6671	Oxidation@M	5	0.757584	0.746089	57.0349	57.0622	55.191	58.9334
ALDVGSGSGILTACFAR	2	17	808	69.8442	Carbamidomethyl@C	14	0.978985	0.989192	70.4056	70.416	68.5446	72.2873
ALDVMVSTFHK	2	11	809	51.2348	NA	NA	0.640632	0.645783	51.5181	51.5523	49.6811	53.4235
ALDVMVSTFHK	3	11	810	51.2348	NA	NA	0.640632	0.645783	51.5181	51.5523	49.6811	53.4235
ALDVMVSTFHK	2	11	811	45.0828	Oxidation@M	5	0.528779	0.520819	44.6451	44.688	42.8168	46.5592
ALDVSASDDEIAR	2	13	812	47.4237	NA	NA	0.571341	0.582156	48.0186	48.0573	46.1861	49.9285
ALEAANGELEVK	2	12	813	45.2091	NA	NA	0.531075	0.524377	44.8407	44.8834	43.0122	46.7546
ALEAVFGK	2	8	816	47.8895	NA	NA	0.579808	0.600836	49.046	49.0833	47.2122	50.9545
ALEEAMEQK	2	9	818	34.5512	NA	NA	0.337294	0.342559	34.8407	34.896	33.0248	36.7673
ALEEANTELEVK	2	12	819	45.8844	NA	NA	0.543353	0.542669	45.8468	45.8882	44.017	47.7594
ALEEELAGLK	2	10	820	55.8206	NA	NA	0.724011	0.727488	56.0118	56.0404	54.1692	57.9116
ALEEGLTPQEICDK	2	14	821	52.8874	Carbamidomethyl@C	12	0.670679	0.675104	53.1307	53.1629	51.2917	55.0341
ALEESNYELEGK	2	12	822	43.8854	NA	NA	0.507007	0.509389	44.0164	44.0601	42.1889	45.9313
ALEHFTDLYDIK	2	12	824	60.5321	NA	NA	0.809674	0.803294	60.1812	60.2045	58.3333	62.0757
ALEHFTDLYDIK	3	12	825	60.5321	NA	NA	0.809674	0.803294	60.1812	60.2045	58.3333	62.0757
ALEHSALAINHK	2	12	826	29.8048	NA	NA	0.250997	0.243707	29.4039	29.466	27.5947	31.3374
ALEHSALAINHK	3	12	827	29.8048	NA	NA	0.250997	0.243707	29.4039	29.466	27.5947	31.3374
ALEHVDGTHVCQLPEDQK	3	18	828	40.2399	Carbamidomethyl@C	11	0.440725	0.443545	40.395	40.4433	38.572	42.3145
ALEHVPNSVR	2	10	829	32.0382	NA	NA	0.291603	0.298876	32.4382	32.4965	30.6252	34.3678
ALEIIPR	2	7	830	49.4607	NA	NA	0.608376	0.609081	49.4994	49.5362	47.6651	51.4074
ALELDPDNETYK	2	12	831	50.5437	NA	NA	0.628068	0.62389	50.3139	50.3497	48.4785	52.2209
ALELEQER	2	8	832	37.4683	NA	NA	0.390332	0.386218	37.242	37.2943	35.423	39.1655
ALELEQERK	2	9	833	29.7566	NA	NA	0.25012	0.238752	29.1313	29.1938	27.3225	31.0652
ALELNMLSLK	2	10	834	69.2818	NA	NA	0.96876	0.973689	69.5529	69.5644	67.693	71.4357
ALELTGLK	2	8	835	49.2638	NA	NA	0.604797	0.610468	49.5757	49.6124	47.7412	51.4836
ALENDPDCR	2	9	837	27.4894	Carbamidomethyl@C	8	0.208898	0.205224	27.2873	27.3522	25.4808	29.2235
ALEQLNGFELAGR	2	13	839	63.9513	NA	NA	0.871842	0.881075	64.4591	64.4771	62.6058	66.3483
ALEQQVEEMK	2	10	840	43.989	NA	NA	0.50889	0.503045	43.6675	43.7116	41.8404	45.5828
ALESGDVNTVWK	2	12	841	51.9173	NA	NA	0.653041	0.655096	52.0303	52.0639	50.1927	53.9351
ALESPERPFLAILGGAK	2	17	842	70.7832	NA	NA	0.996059	0.992454	70.585	70.5952	68.7238	72.4665
ALESPERPFLAILGGAK	3	17	843	70.8166	NA	NA	0.996665	0.992454	70.585	70.5952	68.7238	72.4665
ALETCGGDLK	2	10	845	33.8647	Carbamidomethyl@C	5	0.324812	0.347901	35.1345	35.1895	33.3182	37.0607
ALGAHLEAEPK	2	11	849	33.1797	NA	NA	0.312359	0.323338	33.7836	33.8402	31.9689	35.7115
ALGFPLER	2	8	853	56.2158	NA	NA	0.731197	0.735707	56.4639	56.4919	54.6207	58.3631
ALGFPLERPK	3	10	855	48.2748	NA	NA	0.586814	0.585455	48.2	48.2385	46.3673	50.1097
ALGHPAMLSK	2	10	856	32.4838	NA	NA	0.299706	0.295941	32.2768	32.3353	30.464	34.2066
ALGNNFYEYYVDDPPR	2	16	858	68.1882	NA	NA	0.948877	0.959658	68.7812	68.7937	66.9223	70.665
ALGQAASDNSGPEDAK	2	16	859	31.4046	NA	NA	0.280083	0.288346	31.859	31.9181	30.0468	33.7894
ALGQNPTNAEVLK	2	13	860	43.6698	NA	NA	0.503087	0.494791	43.2135	43.2582	41.387	45.1294
ALGSEVQDASK	2	11	861	32.6616	NA	NA	0.302938	0.299645	32.4805	32.5388	30.6675	34.41
ALGTEVIQLFPEK	2	13	862	72.7967	NA	NA	1.03267	1.02271	72.2493	72.2574	70.386	74.1288
ALGTLVSHVTLR	2	12	863	51.7317	NA	NA	0.649666	0.657541	52.1647	52.1982	50.327	54.0694
ALHHGIDLEK	2	10	865	28.5321	NA	NA	0.227855	0.227684	28.5226	28.5859	26.7146	30.4573
ALHHGIDLEK	3	10	866	28.5321	NA	NA	0.227855	0.227684	28.5226	28.5859	26.7146	30.4573
ALHSDRPPSASQPR	3	14	868	24.9228	NA	NA	0.162232	0.173067	25.5187	25.5857	23.7143	27.4571
ALHSVLQAVPLNELR	2	15	869	62.6906	NA	NA	0.848921	0.860001	63.3001	63.3194	61.4482	65.1907
ALIAAQLDNAIEK	2	13	870	60.0662	NA	NA	0.801204	0.811864	60.6525	60.6753	58.804	62.5465
ALIAAQYSGAQVR	2	13	871	47.9171	NA	NA	0.580311	0.575365	47.6451	47.6842	45.813	49.5554
ALIAGGGAPEIELALR	2	16	872	72.1342	NA	NA	1.02062	1.01748	71.9614	71.9698	70.0985	73.8412
ALIEMEK	2	7	873	41.089	NA	NA	0.456163	0.458543	41.2199	41.2671	39.3959	43.1383
ALIHSACVK	2	9	875	28.4462	Carbamidomethyl@C	7	0.226295	0.243456	29.3901	29.4522	27.5809	31.3236
ALINSPEGAVGR	2	12	877	45.4462	NA	NA	0.535386	0.526724	44.9698	45.0123	43.1411	46.8835
ALIPLALEGTDVGQTK	2	16	878	69.8442	NA	NA	0.978985	0.978159	69.7987	69.8099	67.9386	71.6812
ALIVEPSR	2	8	879	40.2924	NA	NA	0.441681	0.434666	39.9066	39.9555	38.0843	41.8267
ALKPPPIK	2	8	880	31.2349	NA	NA	0.276997	0.269905	30.8448	30.9051	29.0338	32.7764
ALLANALTSALR	2	12	882	68.4352	NA	NA	0.953368	0.964643	69.0553	69.0675	67.1961	70.9388
ALLDASETTSTR	2	12	883	41.9612	NA	NA	0.472022	0.478236	42.303	42.3489	40.4776	44.2201
ALLDQLMGTAR	2	11	884	70.4022	NA	NA	0.98913	0.958912	68.7402	68.7527	66.8814	70.624
ALLEAGALPNAPNSYGR	2	17	886	59.8645	NA	NA	0.797537	0.798573	59.9215	59.9452	58.074	61.8164
ALLEVVQSGGK	2	11	889	49.3498	NA	NA	0.60636	0.602829	49.1556	49.1928	47.3216	51.064
ALLFIPR	2	7	890	61.2861	NA	NA	0.823384	0.858518	63.2185	63.2379	61.3667	65.1092
ALLFVPR	2	7	891	56.7942	NA	NA	0.741713	0.759941	57.7968	57.8231	55.9519	59.6943
ALLLTDQHLYK	2	11	893	51.598	NA	NA	0.647236	0.631437	50.729	50.7643	48.8931	52.6355
ALLLTGDFSQAGNK	2	14	894	60.272	NA	NA	0.804945	0.793282	59.6305	59.6545	57.7833	61.5258
ALLPHVLCK	3	9	895	46.0586	Carbamidomethyl@C	8	0.546521	0.546197	46.0408	46.082	44.2108	47.9532
ALLQSSASR	2	9	899	30.4093	NA	NA	0.261987	0.26127	30.3699	30.4308	28.5595	32.3021
ALLTLADGR	2	9	901	50.8806	NA	NA	0.634192	0.631424	50.7283	50.7636	48.8924	52.6348
ALLTPVAIAAGR	2	12	902	60.6187	NA	NA	0.811249	0.791178	59.5148	59.539	57.6677	61.4102
ALLVQVVNK	2	9	904	48.6331	NA	NA	0.593329	0.595715	48.7643	48.8021	46.9309	50.6732
ALLVTASQCQQPAENK	2	16	905	42.9667	Carbamidomethyl@C	9	0.490304	0.491849	43.0517	43.0966	41.2254	44.9678
ALMDEVVK	2	8	906	47.9766	NA	NA	0.581392	0.564896	47.0693	47.1092	45.238	48.9803
ALMDSLGPEWR	2	11	907	66.5121	NA	NA	0.918401	0.900362	65.5199	65.5365	63.6652	67.4078
ALMGLYHGQVLCK	2	13	908	52.2477	Carbamidomethyl@C	12	0.659049	0.663082	52.4695	52.5025	50.6314	54.3737
ALMLQGVDLLADAVAVTMGPK	2	21	909	73.462	NA	NA	1.04476	1.04515	73.4833	73.4898	71.6184	75.3612
ALMLQGVDLLADAVAVTMGPK	3	21	910	73.462	NA	NA	1.04476	1.04515	73.4833	73.4898	71.6184	75.3612
ALMPVLLQGQAR	2	12	913	62.6013	NA	NA	0.847296	0.842724	62.3498	62.3704	60.4992	64.2416
ALMLQGVDLLADAVAVTMGPK	2	21	914	73.3454	Oxidation@M	3	1.04264	1.04077	73.2422	73.249	71.3776	75.1204
ALNQEQVIAVHIDNGFMR	3	18	918	65.6663	NA	NA	0.903024	0.913714	66.2543	66.2699	64.3986	68.1412
ALNRPPTYPTK	2	11	919	32.6616	NA	NA	0.302938	0.30089	32.5489	32.6071	30.7358	34.4784
ALPASETPK	2	9	921	29.2773	NA	NA	0.241405	0.254405	29.9923	30.0537	28.1824	31.925
ALPAVQQNNLDEDLIR	2	16	922	63.357	NA	NA	0.861036	0.874868	64.1177	64.1361	62.2648	66.0073
ALPAVQQNNLDEDLIRK	2	17	923	55.2807	NA	NA	0.714194	0.720758	55.6417	55.6707	53.7995	57.5419
ALPAVQQNNLDEDLIRK	3	17	924	55.2807	NA	NA	0.714194	0.720758	55.6417	55.6707	53.7995	57.5419
ALPCIVDVR	2	9	925	56.1316	Carbamidomethyl@C	4	0.729665	0.73818	56.5999	56.6277	54.7565	58.4989
ALPFWNEEIVPQIK	2	14	928	73.176	NA	NA	1.03956	1.0501	73.7554	73.7615	71.8901	75.6329
ALPLIVGAQLIHADK	2	15	930	67.7819	NA	NA	0.941489	0.916804	66.4242	66.4396	64.5684	68.3109
ALQAAYGASAPSVTSAALR	2	19	932	56.2158	NA	NA	0.731197	0.737382	56.556	56.5839	54.7127	58.4551
ALQALEELR	2	9	933	54.1644	NA	NA	0.693898	0.69296	54.1128	54.1438	52.2726	56.015
ALQAQEIECR	2	10	934	38.1526	Carbamidomethyl@C	9	0.402774	0.426474	39.456	39.5055	37.6343	41.3767
ALQASALK	2	8	935	31.1218	NA	NA	0.274942	0.278058	31.2932	31.353	29.4817	33.2243
ALQDLENAASGDATVR	2	16	937	55.3899	NA	NA	0.71618	0.696444	54.3044	54.3352	52.464	56.2063
ALQDMSSTAPPAPQPSTR	2	18	938	46.3528	NA	NA	0.551868	0.544852	45.9669	46.0081	44.1369	47.8793
ALQEGEGDLSISADR	2	15	939	49.3752	NA	NA	0.606822	0.606251	49.3438	49.3808	47.5096	51.252
ALQFLEEVK	2	9	940	60.4743	NA	NA	0.808623	0.813737	60.7555	60.7781	58.9069	62.6494
ALQPLEEGEDEEK	2	13	942	43.4445	NA	NA	0.498992	0.501957	43.6076	43.6519	41.7807	45.5231
ALQQLLFPGK	2	10	943	63.711	NA	NA	0.867472	0.844564	62.451	62.4715	60.6002	64.3427
ALQSGQCAGAALDVFTEEPPRDR	3	23	945	60.1837	Carbamidomethyl@C	7	0.803339	0.801665	60.0916	60.115	58.2438	61.9862
ALQSYYEAK	2	9	948	38.6516	NA	NA	0.411848	0.421741	39.1957	39.2455	37.3743	41.1168
ALQVGCLLR	2	9	949	56.4105	Carbamidomethyl@C	6	0.734737	0.733562	56.3459	56.3741	54.5029	58.2453
ALSAVHSPTFCQLACGQDGQLK	3	22	950	56.9168	Carbamidomethyl@C;Carbamidomethyl@C	11;15	0.743941	0.743361	56.8848	56.9123	55.0411	58.7835
ALSDHHIYLEGTLLK	3	15	952	54.5177	NA	NA	0.700322	0.709052	54.9979	55.0277	53.1565	56.8989
ALSDHHIYLEGTLLK	4	15	953	54.4943	NA	NA	0.699897	0.709052	54.9979	55.0277	53.1565	56.8989
ALSNLESIPGGYNALR	2	16	955	64.4072	NA	NA	0.88013	0.885007	64.6754	64.693	62.8218	66.5643
ALSQAAVEEEEEEEEEEEPAQGK	2	23	957	51.7884	NA	NA	0.650699	0.651823	51.8503	51.8841	50.0129	53.7553
ALSQLAEVEEK	2	11	958	47.1068	NA	NA	0.565579	0.572711	47.4991	47.5384	45.6673	49.4096
ALSSDSILSPAPDAR	2	15	959	53.2953	NA	NA	0.678096	0.685634	53.7099	53.7414	51.8702	55.6125
ALSSQHQAR	2	9	960	18.1583	NA	NA	0.0392424	0.0788798	20.3384	20.412	18.5405	22.2835
ALSSVGLHMTK	2	11	961	39.1734	NA	NA	0.421334	0.429733	39.6353	39.6845	37.8133	41.5558
ALSTDPAAPNLK	2	12	962	42.8875	NA	NA	0.488864	0.474823	42.1153	42.1614	40.2902	44.0326
ALSVGLVK	2	8	963	44.92	NA	NA	0.525818	0.52166	44.6913	44.7342	42.863	46.6054
ALSVLGCGHTSSTK	2	14	966	34.2423	Carbamidomethyl@C	7	0.331678	0.34611	35.036	35.0911	33.2198	36.9623
ALTAEIVK	2	8	967	40.6284	NA	NA	0.44779	0.448633	40.6748	40.7227	38.8515	42.5939
ALTALGLAVPR	2	11	968	62.0753	NA	NA	0.837732	0.837715	62.0743	62.0952	60.224	63.9665
ALTGGIAHLFK	2	11	970	54.1129	NA	NA	0.692962	0.699185	54.4552	54.4857	52.6145	56.3569
ALTHIDHSLSR	2	11	971	30.9213	NA	NA	0.271296	0.281037	31.4571	31.5166	29.6453	33.3879
ALTLIAGSPLK	2	11	972	59.6603	NA	NA	0.793823	0.789964	59.448	59.4722	57.601	61.3435
ALTLPGSSENEYIMK	2	15	973	62.1644	NA	NA	0.839353	0.83492	61.9206	61.9417	60.0705	63.8129
ALTLPGSSENEYIMK	2	15	974	56.3	Oxidation@M	14	0.732728	0.715238	55.3381	55.3675	53.4963	57.2387
ALTNLPHTDFTLCK	2	14	975	56.948	Carbamidomethyl@C	13	0.744509	0.731584	56.2371	56.2654	54.3942	58.1366
ALTNLPHTDFTLCK	3	14	976	56.948	Carbamidomethyl@C	13	0.744509	0.731584	56.2371	56.2654	54.3942	58.1366
ALTQTGGPHVK	2	11	977	26.1369	NA	NA	0.184308	0.17447	25.5958	25.6628	23.7914	27.5342
ALTSEIALLQSR	2	12	979	63.5091	NA	NA	0.863802	0.890319	64.9675	64.9848	63.1135	66.8561
ALTSELANAR	2	10	980	40.9851	NA	NA	0.454274	0.460496	41.3273	41.3744	39.5032	43.2456
ALTVPELTQQMFDAK	2	15	982	73.0939	NA	NA	1.03807	1.03211	72.7658	72.7732	70.9019	74.6446
ALTVPELTQQMFDAK	2	15	985	64.2635	Oxidation@M	11	0.877518	0.88031	64.4171	64.435	62.5638	66.3063
ALTVPELTQQVFDAK	2	15	986	73.0733	NA	NA	1.0377	1.02831	72.557	72.5647	70.6934	74.4361
ALVADSHPESER	2	12	988	28.7906	NA	NA	0.232556	0.227462	28.5104	28.5737	26.7024	30.4451
ALVADSHPESER	3	12	989	28.8193	NA	NA	0.233078	0.227462	28.5104	28.5737	26.7024	30.4451
ALVATPGK	2	8	990	31.264	NA	NA	0.277527	0.254296	29.9863	30.0477	28.1764	31.919
ALVAYYQK	2	8	991	40.9585	NA	NA	0.45379	0.468934	41.7914	41.8379	39.9667	43.7091
ALVDGPCTQVR	2	11	992	42.1568	Carbamidomethyl@C	7	0.475578	0.46922	41.8071	41.8536	39.9824	43.7248
ALVDHENVISCPHLGASTK	2	19	993	46.1608	Carbamidomethyl@C	11	0.548379	0.565009	47.0755	47.1154	45.2442	48.9865
ALVDHENVISCPHLGASTK	3	19	994	46.1349	Carbamidomethyl@C	11	0.547908	0.565009	47.0755	47.1154	45.2442	48.9865
ALVDHENVISCPHLGASTK	4	19	995	46.1349	Carbamidomethyl@C	11	0.547908	0.565009	47.0755	47.1154	45.2442	48.9865
ALVDHHDAEVK	3	11	996	26.0377	NA	NA	0.182503	0.178961	25.8429	25.9095	24.0381	27.7809
ALVEFTNSPDCLSK	2	14	998	57.7222	Carbamidomethyl@C	11	0.758586	0.760162	57.8089	57.8352	55.964	59.7064
ALVELLR	2	7	999	56.0747	NA	NA	0.72863	0.721688	55.6929	55.7218	53.8506	57.593
ALVFVDNHDNQR	2	12	1001	40.1841	NA	NA	0.43971	0.462346	41.429	41.476	39.6048	43.3472
ALVILAK	2	7	1002	45.6605	NA	NA	0.539281	0.547377	46.1057	46.1468	44.2756	48.018
ALVPMFVR	2	8	1005	62.1026	NA	NA	0.83823	0.83941	62.1675	62.1883	60.3171	64.0596
ALVQNDTLLQVK	2	12	1006	55.8206	NA	NA	0.724011	0.72873	56.0802	56.1087	54.2375	57.9799
ALWCSEDK	2	8	1008	39.8871	Carbamidomethyl@C	4	0.43431	0.429649	39.6307	39.6799	37.8087	41.5512
ALWEETSFQLDR	2	12	1009	68.782	NA	NA	0.959673	0.967564	69.216	69.2279	67.3566	71.0992
ALWQSVQEQSAR	2	12	1011	49.9295	NA	NA	0.6169	0.606431	49.3537	49.3907	47.5195	51.2619
ALYDYAGQEADELSFR	2	16	1013	70.0737	NA	NA	0.983158	1.00042	71.0234	71.033	69.1616	72.9043
ALYEAGER	2	8	1014	31.8154	NA	NA	0.287553	0.28698	31.7839	31.8431	29.9718	33.7144
ALYEHLTAK	2	9	1015	35.6536	NA	NA	0.357338	0.332772	34.3025	34.3584	32.4872	36.2297
ALYEQNQSDVNEAK	2	14	1016	36.8154	NA	NA	0.378462	0.367717	36.2244	36.278	34.4067	38.1492
ALYESELADAR	2	11	1017	48.9307	NA	NA	0.59874	0.59587	48.7729	48.8106	46.9394	50.6818
ALYETELADAR	2	11	1018	50.434	NA	NA	0.626072	0.616314	49.8972	49.9335	48.0624	51.8047
ALYLGAK	2	7	1019	36.8742	NA	NA	0.379532	0.40832	38.4576	38.5083	36.6371	40.3795
AMADALLER	2	9	1022	51.0413	NA	NA	0.637115	0.639519	51.1735	51.2082	49.337	53.0794
AMADPEVQQIMSDPAMR	2	17	1023	65.6663	NA	NA	0.903024	0.913839	66.2612	66.2768	64.4055	68.1481
AMDLAQAGSTVESK	2	14	1026	46.2429	NA	NA	0.549871	0.546091	46.035	46.0762	44.205	47.9473
AMDPAVPNMMIDAAK	2	15	1027	64.2013	NA	NA	0.876387	0.887769	64.8273	64.8447	62.9735	66.716
AMDSDWFAENYMGR	2	14	1028	72.2358	NA	NA	1.02247	1.01342	71.738	71.7467	69.8754	73.6181
AMEAVAAQGK	2	10	1029	28.0806	NA	NA	0.219648	0.229315	28.6123	28.6755	26.8041	30.5468
AMEVDERPTEQYSDIGGLDK	3	20	1030	54.2794	NA	NA	0.69599	0.715017	55.3259	55.3554	53.4842	57.2266
AMGAAQVVVTDLSATR	2	16	1032	64.1068	NA	NA	0.874669	0.863326	63.4829	63.5021	61.6308	65.3733
AMGGAVPFK	2	9	1033	42.6456	NA	NA	0.484465	0.474305	42.0868	42.1329	40.2617	44.0042
AMGIMNSFVNDIFER	2	15	1034	73.3704	NA	NA	1.0431	1.0409	73.2498	73.2566	71.3852	75.128
AMGIMNSFVNDIFER	2	15	1036	73.135	Oxidation@M	5	1.03882	1.04314	73.3727	73.3794	71.508	75.2507
AMGMTNLPAVGR	2	12	1037	53.2953	NA	NA	0.678096	0.676485	53.2067	53.2388	51.3676	55.11
AMGNLQIDFADPSR	2	14	1038	65.4848	NA	NA	0.899724	0.891934	65.0564	65.0735	63.2022	66.9448
AMHQAQTMEGCSSPMVVK	2	18	1040	40.3206	Carbamidomethyl@C	11	0.442192	0.436902	40.0296	40.0783	38.2071	41.9496
AMINLHIQK	2	9	1041	43.4445	NA	NA	0.498992	0.502531	43.6392	43.6834	41.8122	45.5546
AMLDQLMGTSR	2	11	1042	61.9518	NA	NA	0.835487	0.818756	61.0316	61.0538	59.1826	62.925
AMLESIGVPLEK	2	12	1043	63.5668	NA	NA	0.864851	0.87931	64.362	64.3801	62.5088	66.2513
AMLNNVVRPR	2	10	1044	37.3261	NA	NA	0.387746	0.39189	37.554	37.6058	35.7346	39.4771
AMLSGPGQFAENETNEVNFR	2	20	1045	65.9339	NA	NA	0.907889	0.914642	66.3053	66.3209	64.4496	68.1922
AMLSTGFK	2	8	1046	42.7498	NA	NA	0.486361	0.487812	42.8297	42.8749	41.0037	44.7461
AMQADISQAAQILSSDPSR	2	19	1050	69.6076	NA	NA	0.974683	0.970169	69.3593	69.371	67.4997	71.2423
AMTEDGFLAVCSEAK	2	15	1052	59.391	Carbamidomethyl@C	11	0.788926	0.78588	59.2234	59.2479	57.3767	61.1191
AMVEEMQGHLK	2	11	1055	39.9697	NA	NA	0.435812	0.422371	39.2304	39.2801	37.4089	41.1514
AMVLDLR	2	7	1056	51.7884	NA	NA	0.650699	0.661919	52.4056	52.4387	50.5675	54.3099
AMYLPDTLSPADQLK	2	15	1059	68.3124	NA	NA	0.951135	0.95171	68.344	68.357	66.4857	70.2283
AMGAAQVVVTDLSATR	2	16	1060	57.2075	Oxidation@M	2	0.749226	0.738373	56.6105	56.6383	54.7671	58.5095
AMVASGSELGK	2	11	1063	29.1365	Oxidation@M	2	0.238845	0.247882	29.6335	29.6954	27.824	31.5667
ANAEIAQVR	2	9	1064	31.7249	NA	NA	0.285908	0.302877	32.6582	32.7163	30.845	34.5876
ANAQAAALYK	2	10	1065	32.9257	NA	NA	0.307739	0.31826	33.5043	33.5613	31.69	35.4326
ANCIDSTASAEAVFASEVK	2	19	1066	66.6644	Carbamidomethyl@C	3	0.92117	0.913986	66.2692	66.2849	64.4136	68.1561
ANDDIIVNWVNR	2	12	1068	67.3247	NA	NA	0.933177	0.922446	66.7345	66.7496	64.8783	68.6208
ANDDVAQEIAER	2	12	1069	45.2891	NA	NA	0.53253	0.532912	45.3102	45.3523	43.4811	47.2234
ANDQEPCGWWLAK	2	13	1070	62.9215	Carbamidomethyl@C	7	0.853118	0.845217	62.4869	62.5073	60.6361	64.3786
ANDTTFGLAAGVFTR	2	15	1071	70.4987	NA	NA	0.990885	0.974382	69.591	69.6025	67.7311	71.4738
ANFSLPEK	2	8	1075	43.1999	NA	NA	0.494543	0.501319	43.5725	43.6168	41.7456	45.488
ANGMELDGR	2	9	1076	33.3499	NA	NA	0.315453	0.31543	33.3486	33.4058	31.5345	35.2771
ANGTTVHVGIHPSK	2	14	1078	28.0806	NA	NA	0.219648	0.217181	27.9449	28.0089	26.1376	29.8803
ANGTTVHVGIHPSK	3	14	1079	28.0806	NA	NA	0.219648	0.217181	27.9449	28.0089	26.1376	29.8803
ANHEEVLAAGK	2	11	1080	26.5142	NA	NA	0.191168	0.185509	26.203	26.2692	24.3978	28.1406
ANITAIR	2	7	1081	32.5709	NA	NA	0.30129	0.308812	32.9847	33.0423	31.171	34.9136
ANIVHLMLSSPEQIQK	2	16	1083	60.9316	NA	NA	0.816939	0.857207	63.1464	63.1659	61.2947	65.0372
ANIVHLMLSSPEQIQK	3	16	1084	60.9629	NA	NA	0.817508	0.857207	63.1464	63.1659	61.2947	65.0372
ANIVHLMLSSPEQIQK	3	16	1085	52.9448	Oxidation@M	7	0.671724	0.668163	52.749	52.7817	50.9105	54.6529
ANLLNNEAHAITMQVTK	2	17	1087	57.78	NA	NA	0.759636	0.762078	57.9143	57.9405	56.0693	59.8117
ANLPQSFQVDTSK	2	13	1088	50.4611	NA	NA	0.626565	0.617203	49.9461	49.9824	48.1112	51.8536
ANLQIDQINTDLNLER	2	16	1089	68.284	NA	NA	0.950618	0.958255	68.704	68.7166	66.8453	70.5879
ANNGICFLR	2	9	1090	50.5681	Carbamidomethyl@C	6	0.628511	0.629812	50.6396	50.675	48.8038	52.5462
ANPQVGVAFPHIK	2	13	1092	50.4881	NA	NA	0.627056	0.616834	49.9259	49.9621	48.091	51.8333
ANSNLVLQADR	2	11	1094	40.4894	NA	NA	0.445262	0.434235	39.8829	39.9318	38.0606	41.8031
ANTFVAELK	2	9	1095	47.4237	NA	NA	0.571341	0.59148	48.5314	48.5694	46.6982	50.4406
ANVTVLDTQIR	2	11	1097	50.9879	NA	NA	0.636145	0.633543	50.8449	50.88	49.0088	52.7512
ANYAVDAYFR	2	10	1098	56.5848	NA	NA	0.737905	0.738496	56.6173	56.6451	54.7739	58.5163
APAGQLPR	2	8	1101	29.1365	NA	NA	0.238845	0.252997	29.9148	29.9763	28.105	31.8477
APAMFNIR	2	8	1102	50.7335	NA	NA	0.631518	0.61437	49.7904	49.8268	47.9556	51.698
APASSSSNPEEVQK	2	14	1103	26.8144	NA	NA	0.196625	0.191062	26.5084	26.5742	24.7028	28.4456
APASVLPAATPR	2	12	1104	43.7261	NA	NA	0.504112	0.507586	43.9172	43.9611	42.0899	45.8323
APDELHYTYLDTFGR	3	15	1105	63.0111	NA	NA	0.854747	0.864707	63.5589	63.5779	61.7067	65.4492
APDFLPLLNK	2	10	1106	72.1342	NA	NA	1.02062	0.985218	70.187	70.1977	68.3263	72.069
APDFVFYAPR	2	10	1107	64.3231	NA	NA	0.878601	0.870636	63.885	63.9036	62.0324	65.7749
APDGYIVK	2	8	1108	36.603	NA	NA	0.374599	0.356584	35.6121	35.6664	33.7952	37.5377
APDVDVNIAGPDAALK	2	16	1109	59.5137	NA	NA	0.791158	0.784749	59.1612	59.1858	57.3146	61.057
APEILLGCK	2	9	1110	48.2748	Carbamidomethyl@C	8	0.586814	0.588791	48.3835	48.4217	46.5505	50.2929
APEQEQAAPGPAAGGEAPK	2	19	1111	34.5232	NA	NA	0.336785	0.329725	34.1349	34.191	32.3198	36.0623
APEQEQAAPGPAAGGEAPK	3	19	1112	34.5232	NA	NA	0.336785	0.329725	34.1349	34.191	32.3198	36.0623
APEVNLNAPDVDVHGPDWNLK	3	21	1113	66.0813	NA	NA	0.910569	0.917559	66.4658	66.4811	64.6099	68.3524
APEVSQHVYQAYETILK	3	17	1114	63.8338	NA	NA	0.869705	0.875927	64.176	64.1943	62.323	66.0655
APFDLFENK	2	9	1116	64.2635	NA	NA	0.877518	0.879641	64.3802	64.3982	62.527	66.2695
APFDLFENKK	2	10	1117	53.1695	NA	NA	0.675809	0.667204	52.6962	52.729	50.8578	54.6002
APFDLFENR	2	9	1118	65.6909	NA	NA	0.903471	0.909048	65.9977	66.0136	64.1424	67.8849
APFDLFENRK	3	10	1119	54.384	NA	NA	0.697891	0.690685	53.9877	54.0188	52.1476	55.89
APGIIPR	2	7	1121	37.1888	NA	NA	0.385251	0.381934	37.0064	37.0589	35.1877	38.9302
APGLGAFR	2	8	1122	43.622	NA	NA	0.502217	0.477622	42.2692	42.3151	40.4439	44.1863
APGLGLVLER	2	10	1123	59.1582	NA	NA	0.784694	0.768194	58.2507	58.2764	56.4052	60.1476
APGMNTIDQGMAALK	2	15	1124	61.0541	NA	NA	0.819166	0.817567	60.9662	60.9885	59.1173	62.8597
APGPGLAQGLPQLHSLVLR	3	19	1125	68.8465	NA	NA	0.960846	0.974611	69.6036	69.615	67.7437	71.4863
APGQLECETAIAALNSCLR	3	19	1128	71.8691	Carbamidomethyl@C;Carbamidomethyl@C	7;17	1.0158	1.01161	71.6385	71.6473	69.776	73.5187
APIIAVTR	2	8	1130	41.089	NA	NA	0.456163	0.451382	40.826	40.8737	39.0025	42.745
APILIATDVASR	2	12	1132	55.1716	NA	NA	0.712211	0.711879	55.1534	55.183	53.3118	57.0542
APIQWEER	2	8	1133	43.0277	NA	NA	0.491413	0.489624	42.9293	42.9744	41.1032	44.8456
APIRPDIVNFVHTNLR	4	16	1135	60.127	NA	NA	0.802309	0.806243	60.3434	60.3665	58.4953	62.2377
APKPDGPGGGPGGSHMGGNYGDDR	2	24	1136	32.3775	NA	NA	0.297773	0.298474	32.4161	32.4744	30.6031	34.3457
APKPDGPGGGPGGSHMGGNYGDDR	3	24	1137	32.4372	NA	NA	0.298858	0.298474	32.4161	32.4744	30.6031	34.3457
APKPDGPGGGPGGSHMGGNYGDDR	4	24	1138	32.4372	NA	NA	0.298858	0.298474	32.4161	32.4744	30.6031	34.3457
APKPDGPGGGPGGSHMGGNYGDDR	3	24	1139	28.3531	Oxidation@M	16	0.224602	0.222116	28.2164	28.28	26.4087	30.1514
APKPDGPGGGPGGSHMGGNYGDDRR	4	25	1140	26.5142	Oxidation@M	16	0.191168	0.192802	26.6041	26.6698	24.7984	28.5412
APKPEDIDEEDDDVPDLVENFDEASK	3	26	1141	71.7675	NA	NA	1.01396	1.01545	71.8496	71.8581	69.9868	73.7295
APLDIPIPDPPPKDDEMETDK	3	21	1144	63.2132	NA	NA	0.858422	0.865093	63.5801	63.5991	61.7279	65.4704
APLEHELAGEPQLR	2	14	1146	46.8622	NA	NA	0.56113	0.577573	47.7665	47.8055	45.9343	49.6767
APLEVAQEH	2	9	1147	35.1825	NA	NA	0.348772	0.339074	34.6491	34.7046	32.8333	36.5759
APLEVPQALGR	2	11	1148	53.5076	NA	NA	0.681955	0.678513	53.3182	53.3502	51.479	55.2214
APLNVQFNSPLPGDAVK	2	17	1150	66.1697	NA	NA	0.912176	0.898064	65.3935	65.4103	63.539	67.2815
APLPLGHIK	2	9	1152	38.5431	NA	NA	0.409874	0.412676	38.6972	38.7476	36.8764	40.6189
APLVLKD	2	7	1154	38.3224	NA	NA	0.405862	0.403142	38.1728	38.2239	36.3527	40.0952
APMFSWPR	2	8	1155	61.5534	NA	NA	0.828244	0.807504	60.4127	60.4357	58.5645	62.307
APNISMPDVDLNLK	2	14	1157	69.2185	NA	NA	0.967609	0.968632	69.2748	69.2866	67.4153	71.1579
APNTPDILEIEFK	2	13	1158	72.2358	NA	NA	1.02247	1.01408	71.7743	71.7829	69.9116	73.6543
APNTPDILEIEFKK	3	14	1160	61.7786	NA	NA	0.832338	0.842955	62.3625	62.3831	60.5118	64.2543
APNYSCVMTGSWDK	2	14	1161	57.9249	Carbamidomethyl@C	6	0.762271	0.749524	57.2238	57.2509	55.3797	59.1221
APPHELTEEEK	2	11	1164	28.5912	NA	NA	0.22893	0.197479	26.8614	26.9267	25.0554	28.7981
APPHELTEEEK	3	11	1165	28.5912	NA	NA	0.22893	0.197479	26.8614	26.9267	25.0554	28.7981
APPNATLEHFYLTSGK	2	16	1166	54.9043	NA	NA	0.707352	0.718152	55.4984	55.5276	53.6564	57.3988
APPNATLEHFYLTSGK	3	16	1167	54.9043	NA	NA	0.707352	0.718152	55.4984	55.5276	53.6564	57.3988
APPVDDAEVDELVLQTK	2	17	1170	68.4987	NA	NA	0.954522	0.959652	68.7809	68.7933	66.922	70.6646
APQETYADIGGLDNQIQEIK	2	20	1171	67.9067	NA	NA	0.943758	0.947904	68.1347	68.148	66.2767	70.0193
APQEVEEDDGR	2	11	1172	27.841	NA	NA	0.215291	0.221485	28.1817	28.2454	26.374	30.1167
APQLVGQFIAR	2	11	1173	58.2421	NA	NA	0.768038	0.777723	58.7748	58.7998	56.9286	60.6711
APQVLVLAPTR	2	11	1174	54.1373	NA	NA	0.693405	0.691634	54.0399	54.071	52.1998	55.9421
APSTPLLTVR	2	10	1176	49.1491	NA	NA	0.60271	0.598043	48.8924	48.9299	47.0587	50.8011
APSVANVGSHCDLSLK	2	16	1177	45.7446	Carbamidomethyl@C	11	0.540811	0.539549	45.6752	45.7168	43.8456	47.588
APSVATVGSICDLNLK	2	16	1179	63.8898	Carbamidomethyl@C	11	0.870724	0.872342	63.9788	63.9973	62.126	65.8686
APSVPAAEPEYPK	2	13	1180	44.7686	NA	NA	0.523066	0.537032	45.5367	45.5785	43.7073	47.4497
APVAGTCYQAEWDDYVPK	2	18	1182	67.1351	Carbamidomethyl@C	7	0.929729	0.915357	66.3446	66.3602	64.4889	68.2314
APVDITGQFEK	2	11	1183	51.8701	NA	NA	0.652184	0.648044	51.6424	51.6765	49.8053	53.5477
APVGSVVSVPSQSSASSDK	2	19	1185	44.8234	NA	NA	0.524062	0.525162	44.8839	44.9265	43.0553	46.7977
APVPASELLASGVLSR	2	16	1188	69.2818	NA	NA	0.96876	0.969292	69.3111	69.3229	67.4515	71.1942
APVPASELLASGVLSR	3	16	1189	69.2818	NA	NA	0.96876	0.969292	69.3111	69.3229	67.4515	71.1942
APVPGTPDSLSSGSSR	2	16	1190	42.6941	NA	NA	0.485347	0.47962	42.3791	42.4249	40.5537	44.2961
APVPTGEVYFADSFDR	2	16	1191	68.4987	NA	NA	0.954522	0.96441	69.0425	69.0547	67.1833	70.926
APVQPQQSPAAAPGGTDEK	2	19	1192	35.41	NA	NA	0.352909	0.352165	35.3691	35.4237	33.5525	37.295
APVSALPLAPNHLGGGAVVLGAESHASK	3	28	1193	59.7837	NA	NA	0.796068	0.795664	59.7615	59.7854	57.9142	61.6566
APVSYPNTLPESFTK	2	15	1194	59.7837	NA	NA	0.796068	0.791685	59.5427	59.5668	57.6956	61.438
APWIEQEGPEYWDR	2	14	1196	67.689	NA	NA	0.939799	0.939837	67.6911	67.7049	65.8336	69.5762
AQAAAPASVPAQAPK	2	15	1198	36.3364	NA	NA	0.369752	0.377882	36.7835	36.8364	34.9651	38.7076
AQAALAVNISAAR	2	13	1199	49.2332	NA	NA	0.604239	0.602345	49.1289	49.1662	47.295	51.0374
AQAALQAVNSVQSGNLALAASAAAVDAGMAMAGQSPVLR	3	39	1200	73.3454	NA	NA	1.04264	1.04049	73.2271	73.234	71.3626	75.1053
AQADLAYQLQVAK	2	13	1203	54.0029	NA	NA	0.690961	0.709779	55.0378	55.0676	53.1965	56.9388
AQAEAQQPTFDALRDELR	2	18	1204	59.8957	NA	NA	0.798103	0.797363	59.855	59.8787	58.0075	61.7499
AQAELVGTADEATR	2	14	1206	41.1428	NA	NA	0.457141	0.460013	41.3007	41.3479	39.4767	43.2191
AQAGEGVRPSPMQLELR	3	17	1208	50.2175	NA	NA	0.622136	0.630176	50.6597	50.695	48.8238	52.5662
AQALEDLAGFK	2	11	1209	59.0482	NA	NA	0.782694	0.77299	58.5144	58.5398	56.6686	60.4111
AQASSIPVGSR	2	11	1211	32.205	NA	NA	0.294637	0.32217	33.7194	33.7761	31.9048	35.6474
AQAVSEDAGGNEGR	2	14	1212	26.2719	NA	NA	0.186762	0.190299	26.4664	26.5323	24.6609	28.4037
AQCEDDLAEK	2	10	1214	28.474	Carbamidomethyl@C	3	0.226801	0.244517	29.4484	29.5105	27.6392	31.3819
AQCPIVER	2	8	1215	30.89	Carbamidomethyl@C	3	0.270727	0.261396	30.3768	30.4377	28.5664	32.309
AQCYMDTEQYEEAVR	2	15	1216	54.3077	Carbamidomethyl@C	3	0.696503	0.695843	54.2714	54.3022	52.431	56.1733
AQDIQCGLQSR	2	11	1219	35.7699	Carbamidomethyl@C	6	0.359452	0.361385	35.8762	35.9302	34.0589	37.8014
AQDSSLHMPER	2	11	1222	34.3557	NA	NA	0.33374	0.320759	33.6417	33.6985	31.8273	35.5698
AQEAAATQLGLK	2	12	1224	41.536	NA	NA	0.464291	0.467035	41.6869	41.7336	39.8624	43.6048
AQEEADYIEWLK	2	12	1225	69.6772	NA	NA	0.97595	0.987468	70.3107	70.3213	68.4499	72.1926
AQEILSQLPIK	2	11	1226	61.4616	NA	NA	0.826575	0.841941	62.3068	62.3274	60.4562	64.1986
AQELGHSQSALASAQR	2	16	1228	32.9508	NA	NA	0.308196	0.302776	32.6527	32.7107	30.8394	34.582
AQEPESGLSEETQVK	2	15	1231	40.9308	NA	NA	0.453287	0.449536	40.7245	40.7724	38.9012	42.6436
AQEPLVDGCSGGGR	2	14	1232	35.5725	Carbamidomethyl@C	9	0.355863	0.368086	36.2447	36.2983	34.427	38.1695
AQFAEATQR	2	9	1233	29.8347	NA	NA	0.25154	0.260274	30.315	30.3761	28.5047	32.2474
AQFAQPEILIGTIPGAGGTQR	2	21	1234	72.9876	NA	NA	1.03614	1.02943	72.6184	72.626	70.7546	74.4974
AQFEGIVTDLIR	2	12	1236	73.0939	NA	NA	1.03807	1.031	72.705	72.7125	70.8411	74.5839
AQFLVEK	2	7	1237	39.1734	NA	NA	0.421334	0.436834	40.0259	40.0746	38.2034	41.9459
AQGETEVLK	2	9	1238	29.7566	NA	NA	0.25012	0.264658	30.5562	30.6169	28.7456	32.4882
AQGPAASAEEPKPVEAPAANSDQTVTVK	2	28	1239	44.6305	NA	NA	0.520555	0.522631	44.7447	44.7875	42.9163	46.6587
AQGPAASAEEPKPVEAPAANSDQTVTVK	3	28	1240	44.6577	NA	NA	0.521049	0.522631	44.7447	44.7875	42.9163	46.6587
AQGPAASAEEPKPVEAPAANSDQTVTVK	4	28	1241	44.6577	NA	NA	0.521049	0.522631	44.7447	44.7875	42.9163	46.6587
AQGPAASAEEPKPVEAPAANSDQTVTVKE	3	29	1242	45.9366	NA	NA	0.544301	0.544295	45.9362	45.9775	44.1063	47.8487
AQGPQQQPGSEGPSYAK	2	17	1243	33.0667	NA	NA	0.310303	0.309971	33.0484	33.106	31.2347	34.9773
AQGWAPLK	2	8	1244	42.2052	NA	NA	0.476457	0.472744	42.0009	42.0472	40.176	43.9184
AQGYSGLSVK	2	10	1245	37.2186	NA	NA	0.385793	0.396662	37.8164	37.8679	35.9967	39.7392
AQHEDQVEQYK	2	11	1246	26.6158	NA	NA	0.193015	0.193071	26.6189	26.6846	24.8132	28.556
AQHEDQVEQYK	3	11	1247	26.6158	NA	NA	0.193015	0.193071	26.6189	26.6846	24.8132	28.556
AQHPNIVTVR	2	10	1248	31.0401	NA	NA	0.273456	0.271423	30.9283	30.9885	29.1172	32.8598
AQIFANTVDNAR	2	12	1249	45.1852	NA	NA	0.530639	0.543158	45.8737	45.9151	44.0439	47.7863
AQIHDLVLVGGSTR	2	14	1250	48.9017	NA	NA	0.598212	0.581429	47.9786	48.0173	46.1461	49.8885
AQIHDLVLVGGSTR	3	14	1251	48.9017	NA	NA	0.598212	0.581429	47.9786	48.0173	46.1461	49.8885
AQIWDTAGQER	2	11	1252	45.577	NA	NA	0.537764	0.535811	45.4696	45.5115	43.6403	47.3827
AQLADSFHLQQFFR	2	14	1253	72.429	NA	NA	1.02598	1.00201	71.1103	71.1198	69.2485	72.9911
AQLADSFHLQQFFR	3	14	1254	72.1342	NA	NA	1.02062	1.00201	71.1103	71.1198	69.2485	72.9911
AQLEPVASPAK	2	11	1256	36.5499	NA	NA	0.373634	0.372829	36.5056	36.5588	34.6875	38.43
AQLLQPTLEINPR	2	13	1259	61.8654	NA	NA	0.833916	0.837689	62.0729	62.0938	60.2226	63.9651
AQLLVVGSPGPVPR	2	14	1260	58.1029	NA	NA	0.765507	0.775346	58.644	58.6693	56.7981	60.5405
AQLMADFQAGR	2	11	1261	51.4326	NA	NA	0.644229	0.648649	51.6757	51.7098	49.8386	53.5809
AQLQQVEAALSGNGENEDLLK	2	21	1265	72.0022	NA	NA	1.01822	0.983934	70.1164	70.1271	68.2558	71.9985
AQLYIDCEK	2	9	1266	41.2204	Carbamidomethyl@C	7	0.458552	0.448086	40.6448	40.6927	38.8215	42.5639
AQMVQEDLEK	2	10	1267	38.5726	NA	NA	0.410411	0.419104	39.0507	39.1007	37.2295	40.972
AQMVQEDLEK	2	10	1268	32.5402	Oxidation@M	3	0.300731	0.297892	32.384	32.4424	30.5711	34.3137
AQNTWGCGNSLR	2	12	1271	39.4978	Carbamidomethyl@C	7	0.427233	0.435165	39.9341	39.9829	38.1117	41.8541
AQPAQPADEPAEK	2	13	1272	27.9649	NA	NA	0.217543	0.22159	28.1874	28.2511	26.3798	30.1225
AQPLEDLAGLK	2	11	1273	58.9624	NA	NA	0.781134	0.7762	58.691	58.7162	56.845	60.5874
AQPLSLEELLAK	2	12	1274	72.8578	NA	NA	1.03378	1.00355	71.1953	71.2047	69.3334	73.076
AQPSASLGVGYR	2	12	1275	42.7498	NA	NA	0.486361	0.485114	42.6813	42.7267	40.8555	44.5979
AQPTPSSSATQSKPTPVK	3	18	1277	28.7388	NA	NA	0.231615	0.229995	28.6497	28.7128	26.8415	30.5842
AQQEDALAQQAFEEAR	2	16	1279	57.4668	NA	NA	0.753941	0.776588	58.7124	58.7375	56.8663	60.6087
AQQEFAAGVFSNPAVR	2	16	1280	60.7044	NA	NA	0.812806	0.806977	60.3837	60.4068	58.5356	62.278
AQQELEEQTR	2	10	1281	28.1704	NA	NA	0.22128	0.233771	28.8574	28.9203	27.0489	30.7916
AQQELEEQTRR	2	11	1282	26.0377	NA	NA	0.182503	0.189015	26.3958	26.4618	24.5904	28.3332
AQQELEEQTRR	3	11	1283	26.0377	NA	NA	0.182503	0.189015	26.3958	26.4618	24.5904	28.3332
AQQGIVFLDEVDK	2	13	1285	65.6328	NA	NA	0.902415	0.873525	64.0439	64.0623	62.191	65.9336
AQQQEEQGSVNDVK	2	14	1286	27.936	NA	NA	0.217018	0.216558	27.9107	27.9747	26.1034	29.8461
AQQQEEQGSVNDVKEEEK	3	18	1287	30.4093	NA	NA	0.261987	0.256729	30.1201	30.1814	28.31	32.0527
AQQSLELIQSK	2	11	1288	45.472	NA	NA	0.535854	0.5338	45.359	45.401	43.5298	47.2722
AQQVSQGLDVLTAK	2	14	1290	53.1952	NA	NA	0.676276	0.684339	53.6386	53.6702	51.799	55.5414
AQTAHIVLEDGTK	2	13	1293	35.41	NA	NA	0.352909	0.353179	35.4248	35.4794	33.6081	37.3506
AQTEGINISEEALNHLGEIGTK	2	22	1295	68.6566	NA	NA	0.957393	0.961712	68.8942	68.9065	67.0352	70.7778
AQTEWNTGTWR	2	11	1297	49.3752	NA	NA	0.606822	0.608585	49.4722	49.509	47.6378	51.3802
AQTGAPCLSFDIVR	2	14	1298	65.2473	Carbamidomethyl@C	7	0.895406	0.907844	65.9314	65.9475	64.0762	67.8188
AQTLPTSVVTITSESSPGK	2	19	1299	59.0161	NA	NA	0.782111	0.784021	59.1212	59.1458	57.2746	61.017
AQTYELQESNVQLK	2	14	1300	50.2758	NA	NA	0.623196	0.605652	49.3109	49.3479	47.4767	51.2191
AQVADVVVSR	2	10	1301	40.3761	NA	NA	0.443202	0.446168	40.5392	40.5873	38.7161	42.4585
AQVARPGGDTIFGK	2	14	1302	41.6148	NA	NA	0.465725	0.45281	40.9045	40.9522	39.081	42.8234
AQVEEFLAQHGSEYQSVK	2	18	1304	54.0883	NA	NA	0.692514	0.672357	52.9797	53.0121	51.1409	54.8832
AQVEEFLAQHGSEYQSVK	3	18	1305	54.1129	NA	NA	0.692962	0.672357	52.9797	53.0121	51.1409	54.8832
AQVEQELTTLR	2	11	1307	50.4611	NA	NA	0.626565	0.637392	51.0566	51.0914	49.2202	52.9626
AQVSLLIR	2	8	1310	50.5681	NA	NA	0.628511	0.624483	50.3465	50.3823	48.5111	52.2535
AQWANPFDPSK	2	11	1311	60.0374	NA	NA	0.800681	0.794017	59.6709	59.6949	57.8237	61.5661
AQYDELAR	2	8	1312	36.7656	NA	NA	0.377557	0.364791	36.0635	36.1173	34.246	37.9885
AQYEDIANR	2	9	1313	35.7699	NA	NA	0.359452	0.347627	35.1195	35.1745	33.3032	37.0457
AQYYLPDGSTIEIGPSR	2	17	1314	72.7628	NA	NA	1.03205	0.917359	66.4547	66.4701	64.5989	68.3414
ARALEAAALAH	2	11	1315	69.974	NA	NA	0.981345	0.349015	35.1958	35.2507	33.3794	37.1219
ARFEELNADLFR	3	12	1318	60.5625	NA	NA	0.810227	0.809832	60.5408	60.5636	58.6924	62.4348
ARLEIEPEWAYGK	2	13	1319	56.7155	NA	NA	0.740282	0.707095	54.8902	54.9202	53.049	56.7914
ARPFPDGLAEDIDK	2	14	1322	54.7414	NA	NA	0.704389	0.707165	54.8941	54.9241	53.0529	56.7953
ARPFPDGLAEDIDK	3	14	1323	54.8231	NA	NA	0.705875	0.707165	54.8941	54.9241	53.0529	56.7953
ARPVINIVHK	3	10	1324	31.0645	NA	NA	0.273901	0.27173	30.9451	31.0054	29.134	32.8767
ASAAFSSVGSVITK	2	14	1325	53.5353	NA	NA	0.682459	0.674779	53.1128	53.1451	51.2739	55.0163
ASAALAALEK	2	10	1326	42.804	NA	NA	0.487345	0.500055	43.503	43.5474	41.6762	45.4186
ASAAPKPEPVPVQK	2	14	1327	31.2933	NA	NA	0.27806	0.276886	31.2287	31.2886	29.4172	33.1599
ASADLMSYCEEHAR	2	14	1328	43.0277	Carbamidomethyl@C	9	0.491413	0.491464	43.0305	43.0755	41.2043	44.9467
ASAELALGENSEVLK	2	15	1329	55.4421	NA	NA	0.717129	0.72197	55.7083	55.7373	53.8661	57.6085
ASAGHAVSIAQDDAGADDWETDPDFVNDVSEK	3	32	1331	66.3278	NA	NA	0.91505	0.91638	66.4009	66.4164	64.5451	68.2876
ASASGSGAQVGGPISSGSSASSVTVTR	2	27	1333	46.6298	NA	NA	0.556905	0.557454	46.66	46.7003	44.8291	48.5715
ASASGSGAQVGGPISSGSSASSVTVTR	3	27	1334	46.6298	NA	NA	0.556905	0.557454	46.66	46.7003	44.8291	48.5715
ASAYEALEK	2	9	1335	37.3466	NA	NA	0.388119	0.361556	35.8856	35.9396	34.0683	37.8108
ASEAGEVPFNHEILR	2	15	1337	51.2348	NA	NA	0.640632	0.648227	51.6525	51.6866	49.8154	53.5577
ASEAGEVPFNHEILR	3	15	1338	51.2348	NA	NA	0.640632	0.648227	51.6525	51.6866	49.8154	53.5577
ASEDGESVGHCPSCQR	2	16	1339	26.847	Carbamidomethyl@C;Carbamidomethyl@C	11;14	0.197218	0.198835	26.9359	27.0012	25.1298	28.8726
ASEDGESVGHCPSCQR	3	16	1340	26.847	Carbamidomethyl@C;Carbamidomethyl@C	11;14	0.197218	0.198835	26.9359	27.0012	25.1298	28.8726
ASEEHLK	2	7	1341	18.185	NA	NA	0.0397267	0.0874664	20.8107	20.8837	19.0122	22.7551
ASEIMVDDEELAQHPATTEDIR	3	22	1343	56.6919	NA	NA	0.739852	0.745008	56.9754	57.0028	55.1316	58.874
ASELHLLETPLVVK	3	14	1344	63.5348	NA	NA	0.864269	0.863918	63.5155	63.5346	61.6633	65.4058
ASEVMGPVEAAPEYR	2	15	1346	51.678	NA	NA	0.64869	0.641444	51.2794	51.3139	49.4428	53.1851
ASEWVQQVSGLMDGK	2	15	1347	71.903	NA	NA	1.01642	1.00627	71.3448	71.354	69.4827	73.2254
ASFENNCEIGCFAK	2	14	1350	53.3752	Carbamidomethyl@C;Carbamidomethyl@C	7;11	0.679549	0.67898	53.3439	53.3758	51.5046	55.247
ASFITANGVSLLK	2	13	1351	65.8696	NA	NA	0.90672	0.919114	66.5513	66.5665	64.6953	68.4378
ASGNYATVISHNPETK	2	16	1358	38.43	NA	NA	0.407818	0.403621	38.1991	38.2502	36.379	40.1214
ASGNYATVISHNPETK	3	16	1359	38.4549	NA	NA	0.408272	0.403621	38.1991	38.2502	36.379	40.1214
ASGPPVSELITK	2	12	1362	50.7335	NA	NA	0.631518	0.625651	50.4108	50.4465	48.5753	52.3177
ASGQAFELILSPR	2	13	1363	67.8752	NA	NA	0.943186	0.964183	69.0301	69.0422	67.1709	70.9135
ASHMGVSTDSGTQETK	3	16	1364	26.9791	NA	NA	0.19962	0.194589	26.7024	26.7679	24.8966	28.6393
ASHTAPQVLFSHR	3	13	1365	35.1004	NA	NA	0.347279	0.356864	35.6275	35.6818	33.8106	37.5531
ASIHEAWTDGK	3	11	1367	35.0177	NA	NA	0.345776	0.351986	35.3592	35.4139	33.5426	37.2851
ASIPFSVVGSNQLIEAK	2	17	1370	70.6911	NA	NA	0.994384	0.986777	70.2727	70.2833	68.412	72.1546
ASLASLPPLHVAK	2	13	1373	51.7317	NA	NA	0.649666	0.654323	51.9878	52.0214	50.1502	53.8926
ASLCISTK	2	8	1374	34.4395	Carbamidomethyl@C	4	0.335264	0.337653	34.5709	34.6266	32.7553	36.4978
ASLEAAIADAEQR	2	13	1375	58.505	NA	NA	0.772817	0.808049	60.4427	60.4657	58.5945	62.3369
ASLEAAIADAEQR	3	13	1376	58.505	NA	NA	0.772817	0.808049	60.4427	60.4657	58.5945	62.3369
ASLEGNLAETENR	2	13	1378	42.7247	NA	NA	0.485904	0.491487	43.0318	43.0767	41.2055	44.9479
ASLENSLR	2	8	1379	35.3822	NA	NA	0.352403	0.341787	34.7983	34.8536	32.9824	36.7249
ASLGSLEGEAEAEASSPK	2	18	1380	58.2998	NA	NA	0.769088	0.742856	56.8571	56.8846	55.0134	58.7558
ASLNPSDTPPSVVNEDFLHDLK	3	22	1382	69.9085	NA	NA	0.980155	0.977612	69.7686	69.7798	67.9085	71.6512
ASLPGVK	2	7	1383	32.4598	NA	NA	0.29927	0.302819	32.655	32.7131	30.8418	34.5844
ASLPTLGFTHFQPAQLTTVGK	3	21	1384	71.8691	NA	NA	1.0158	1.01525	71.8386	71.8472	69.9759	73.7186
ASLQETHFDSTQTK	2	14	1385	34.9947	NA	NA	0.345357	0.343889	34.9139	34.9691	33.0978	36.8404
ASLSLIEK	2	8	1386	44.8464	NA	NA	0.524481	0.509058	43.9982	44.0419	42.1707	45.9131
ASLVALPEQTASEEETPPPLLTK	2	23	1387	71.6338	NA	NA	1.01152	1.00919	71.5054	71.5144	69.6431	73.3858
ASLYNAVTIEDVQK	2	14	1388	58.7676	NA	NA	0.777593	0.777409	58.7575	58.7826	56.9114	60.6538
ASMHPVTAMLVGK	2	13	1389	47.8126	NA	NA	0.578411	0.558939	46.7417	46.7819	44.9108	48.6531
ASMHPVTAMLVGK	3	13	1390	47.8364	NA	NA	0.578844	0.558939	46.7417	46.7819	44.9108	48.6531
ASMQPIQIAEGTGITTR	2	17	1391	61.257	NA	NA	0.822854	0.825139	61.3827	61.4044	59.5332	63.2757
ASMQQQQQLASAR	2	13	1392	33.3737	NA	NA	0.315885	0.31509	33.33	33.3872	31.5159	35.2584
ASNGDAWVEAHGK	2	13	1393	31.7249	NA	NA	0.285908	0.295475	32.2511	32.3097	30.4384	34.181
ASNLENSTYDLYTIPK	2	16	1395	63.0998	NA	NA	0.856359	0.863336	63.4835	63.5026	61.6314	65.3739
ASNLLLNYK	2	9	1396	50.1324	NA	NA	0.620589	0.629545	50.625	50.6603	48.7892	52.5315
ASNTAEVFFDGVR	2	13	1398	60.9629	NA	NA	0.817508	0.834587	61.9023	61.9234	60.0522	63.7947
ASPAGTAGGPGAGAAAGGTGPLAAR	2	25	1399	44.3447	NA	NA	0.515358	0.50728	43.9004	43.9442	42.073	45.8154
ASPDQNASTHTPQSSVK	2	17	1401	26.9469	NA	NA	0.199035	0.192397	26.5818	26.6475	24.7762	28.5189
ASPDQNASTHTPQSSVK	3	17	1402	26.9138	NA	NA	0.198433	0.192397	26.5818	26.6475	24.7762	28.5189
ASPLTHSPPDEL	2	12	1403	47.8364	NA	NA	0.578844	0.561118	46.8615	46.9016	45.0304	48.7728
ASSEGGTAAGAGLDSLHK	2	18	1407	37.6693	NA	NA	0.393988	0.393259	37.6293	37.681	35.8098	39.5523
ASSSSASSAGALESSLDR	2	18	1409	46.7772	NA	NA	0.559586	0.553901	46.4646	46.5052	44.634	48.3764
ASSTSLTSTQPTK	2	13	1410	29.6431	NA	NA	0.248056	0.253116	29.9214	29.9829	28.1116	31.8542
ASSTSPVEISEWLDQK	2	16	1411	70.7832	NA	NA	0.996059	1.00538	71.2957	71.305	69.4337	73.1764
ASSVTTFTGEPNTCPR	2	16	1412	44.9461	Carbamidomethyl@C	14	0.526292	0.518551	44.5203	44.5634	42.6922	46.4346
ASTNAMLISAGLPPLK	2	16	1414	69.3472	NA	NA	0.969948	0.972787	69.5033	69.5148	67.6435	71.3861
ASTSDYQVISDR	2	12	1416	42.076	NA	NA	0.474108	0.475893	42.1741	42.2201	40.3489	44.0914
ASVITQVFHVPLEER	3	15	1417	67.2329	NA	NA	0.931508	0.932373	67.2805	67.2949	65.4236	69.1662
ASVPTIQDQASAMQLSQCAK	2	20	1419	58.1837	Carbamidomethyl@C	18	0.766977	0.766149	58.1382	58.1641	56.2929	60.0353
ASWSSLSMDEK	2	11	1420	51.2348	NA	NA	0.640632	0.659346	52.264	52.2973	50.4261	54.1685
ASYDTLCVLDGDK	2	13	1421	58.9346	Carbamidomethyl@C	7	0.780629	0.775404	58.6472	58.6725	56.8013	60.5437
ASYDVSDSGQLEHVQPWSV	2	19	1422	69.2507	NA	NA	0.968194	0.952942	68.4118	68.4247	66.5534	70.296
ASYVAPLTAQPATYR	2	15	1426	53.05	NA	NA	0.673637	0.690033	53.9518	53.983	52.1118	55.8542
ATAAFILANEHNVALFK	2	17	1427	66.4812	NA	NA	0.91784	0.947125	68.0919	68.1052	66.2339	69.9765
ATAAPAGAPPQPQDLEFTK	2	19	1428	55.8206	NA	NA	0.724011	0.715514	55.3533	55.3827	53.5115	57.2539
ATAEQISSQTGNK	2	13	1429	28.0806	NA	NA	0.219648	0.214528	27.799	27.8632	25.9919	29.7346
ATAFNEQVDK	2	10	1430	34.3276	NA	NA	0.333229	0.339137	34.6525	34.7081	32.8368	36.5793
ATAGAYIASQTVK	2	13	1431	41.3648	NA	NA	0.461179	0.461215	41.3668	41.4139	39.5426	43.2851
ATAGDTHLGGEDFDNR	3	16	1433	39.0563	NA	NA	0.419206	0.418716	39.0294	39.0794	37.2081	40.9506
ATAPQTQHVSPMR	2	13	1434	29.6169	NA	NA	0.24758	0.232854	28.8069	28.8699	26.9985	30.7412
ATAPQTQHVSPMR	2	13	1436	25.7258	Oxidation@M	12	0.176833	0.183601	26.0981	26.1644	24.293	28.0358
ATAPQTQHVSPMR	3	13	1437	25.6916	Oxidation@M	12	0.176211	0.183601	26.0981	26.1644	24.293	28.0358
ATAVMPDGQFK	2	11	1438	44.3724	NA	NA	0.515862	0.514959	44.3227	44.3661	42.4949	46.2373
ATAVMPDGQFK	2	11	1439	36.3364	Oxidation@M	5	0.369752	0.368439	36.2642	36.3177	34.4464	38.1889
ATAVVDGAFK	2	10	1440	40.6827	NA	NA	0.448776	0.452332	40.8782	40.9259	39.0547	42.7971
ATCAPQHGAPGPGPADASK	2	19	1441	28.416	Carbamidomethyl@C	3	0.225745	0.226129	28.4371	28.5004	26.6291	30.3718
ATCAPQHGAPGPGPADASK	3	19	1442	28.416	Carbamidomethyl@C	3	0.225745	0.226129	28.4371	28.5004	26.6291	30.3718
ATCIGNNSAAAVSMLK	2	16	1443	53.2426	Carbamidomethyl@C	3	0.677138	0.684702	53.6586	53.6902	51.819	55.5614
ATDFVVPGPGK	2	11	1445	47.5612	NA	NA	0.573839	0.578187	47.8003	47.8392	45.968	49.7104
ATDGVTLTGINQTGDQSLPSK	2	21	1446	55.9674	NA	NA	0.726679	0.727796	56.0288	56.0573	54.1861	57.9285
ATDLGGTSQAGTSQR	2	15	1447	29.3296	NA	NA	0.242357	0.23629	28.9959	29.0586	27.1873	30.9299
ATEEPEDVR	2	9	1449	28.2254	NA	NA	0.222281	0.224254	28.334	28.3975	26.5261	30.2688
ATEGMVVADK	2	10	1450	32.6321	NA	NA	0.302401	0.304764	32.762	32.8199	30.9486	34.6912
ATEISTAVVQR	2	11	1451	40.6042	NA	NA	0.447348	0.455855	41.072	41.1194	39.2482	42.9907
ATEMLIFGK	2	9	1452	58.8752	NA	NA	0.779549	0.765106	58.0808	58.1068	56.2356	59.978
ATENDIYNFFSPLNPVR	2	17	1456	73.2385	NA	NA	1.0407	1.04463	73.4545	73.461	71.5896	75.3324
ATEPVIAFYEK	2	11	1459	57.0036	NA	NA	0.74552	0.770676	58.3872	58.4128	56.5416	60.284
ATESGAQSAPLPMEGVDISPK	2	21	1461	52.8874	Oxidation@M	13	0.670679	0.673021	53.0162	53.0485	51.1773	54.9197
ATFNPAQDK	2	9	1462	31.3459	NA	NA	0.279015	0.269784	30.8381	30.8985	29.0271	32.7698
ATFYGEQVDYYK	2	12	1463	55.4421	NA	NA	0.717129	0.708296	54.9563	54.9862	53.115	56.8574
ATGEADVEFVTHEDAVAAMSK	2	21	1465	59.753	NA	NA	0.79551	0.826315	61.4473	61.4691	59.5978	63.3403
ATGLGPVDR	2	9	1466	34.3276	NA	NA	0.333229	0.324631	33.8547	33.9113	32.04	35.7825
ATGPPVSELITK	2	12	1467	51.678	NA	NA	0.64869	0.638225	51.1024	51.1372	49.266	53.0083
ATIAGGGVIPHIHK	2	14	1468	40.2924	NA	NA	0.441681	0.411151	38.6133	38.6638	36.7926	40.5351
ATIAGGGVIPHIHK	4	14	1470	40.352	NA	NA	0.442764	0.411151	38.6133	38.6638	36.7926	40.5351
ATIELCSTHANDASALR	2	17	1471	45.2629	Carbamidomethyl@C	6	0.532052	0.530466	45.1757	45.2179	43.3467	47.0891
ATIELCSTHANDASALR	3	17	1472	45.2629	Carbamidomethyl@C	6	0.532052	0.530466	45.1757	45.2179	43.3467	47.0891
ATIGADFLTK	2	10	1473	55.5318	NA	NA	0.718759	0.707323	54.9028	54.9328	53.0616	56.804
ATISNDGATILK	2	12	1475	44.7136	NA	NA	0.522066	0.530364	45.17	45.2123	43.3411	47.0835
ATLELTHNWGTEDDETQSYHNGNSDPR	4	27	1476	50.3032	NA	NA	0.623694	0.624254	50.334	50.3697	48.4985	52.2409
ATLENITNLRPVGEDFR	2	17	1477	63.2407	NA	NA	0.858921	0.852695	62.8982	62.9181	61.0469	64.7894
ATLNAFLYR	2	9	1479	58.7936	NA	NA	0.778066	0.781468	58.9807	59.0055	57.1343	60.8768
ATLSAEVYR	2	9	1481	41.1148	NA	NA	0.456632	0.455187	41.0353	41.0828	39.2116	42.954
ATLVESSTSGFTPGGGGSSVSMIASR	2	26	1482	64.5552	NA	NA	0.882822	0.884312	64.6372	64.6548	62.7836	66.5261
ATLYVTAIEDR	2	11	1483	54.9829	NA	NA	0.708779	0.725042	55.8773	55.906	54.0348	57.7772
ATMQNLNDR	2	9	1484	29.8622	NA	NA	0.25204	0.255228	30.0375	30.0989	28.2276	31.9702
ATNESEDEIPQLVPIGK	2	17	1486	65.4848	NA	NA	0.899724	0.896728	65.32	65.3369	63.4656	67.2081
ATNIEVLSNTFQFTNEAR	2	18	1487	72.8578	NA	NA	1.03378	1.01484	71.8163	71.8249	69.9535	73.6963
ATNVVMNYSEIESK	2	14	1489	53.1404	NA	NA	0.67528	0.677043	53.2374	53.2695	51.3983	55.1406
ATQALVLAPTR	2	11	1492	46.111	NA	NA	0.547473	0.540595	45.7328	45.7743	43.9031	47.6455
ATQMPEGGQGAPPMYQLYK	2	19	1495	59.6043	NA	NA	0.792805	0.787114	59.2912	59.3157	57.4445	61.1869
ATQQQHDFTLTQTADGR	2	17	1496	39.662	NA	NA	0.430219	0.438669	40.1268	40.1754	38.3042	42.0466
ATQQQHDFTLTQTADGR	3	17	1497	39.662	NA	NA	0.430219	0.438669	40.1268	40.1754	38.3042	42.0466
ATSTATSGFAGAIGQK	2	16	1501	44.7424	NA	NA	0.522589	0.51292	44.2106	44.2541	42.3829	46.1253
ATSTSDMLLK	2	10	1502	42.4642	NA	NA	0.481167	0.482886	42.5587	42.6043	40.7331	44.4755
ATTITSVLPK	2	10	1505	50.1324	NA	NA	0.620589	0.619897	50.0943	50.1304	48.2592	52.0015
ATTPADGEEPAPEAEALAAAR	2	21	1507	55.7901	NA	NA	0.723457	0.717246	55.4485	55.4778	53.6066	57.349
ATTSTNWILESQNINELK	2	18	1508	69.3784	NA	NA	0.970517	0.95538	68.5459	68.5587	66.6874	70.43
ATVLNYLPK	2	9	1510	58.1313	NA	NA	0.766024	0.705851	54.8218	54.8519	52.9807	56.7231
ATVLTTER	2	8	1511	30.4093	NA	NA	0.261987	0.257273	30.15	30.2112	28.3399	32.0826
ATVMFECDK	2	9	1512	41.8302	Carbamidomethyl@C	7	0.469639	0.482697	42.5483	42.5939	40.7227	44.4651
ATVNLLGEEK	2	10	1513	45.7446	NA	NA	0.540811	0.541258	45.7692	45.8107	43.9395	47.6819
ATVSAPFGK	2	9	1514	39.1141	NA	NA	0.420256	0.424914	39.3703	39.4199	37.5486	41.2911
ATVTPSPVK	2	9	1515	29.7566	NA	NA	0.25012	0.252063	29.8635	29.9251	28.0537	31.7964
AVACDCLLQEHFYLR	2	15	1519	63.3872	Carbamidomethyl@C;Carbamidomethyl@C	4;6	0.861586	0.857195	63.1457	63.1653	61.2941	65.0366
AVAEPGIQLK	2	10	1521	44.0993	NA	NA	0.510897	0.5033	43.6815	43.7256	41.8544	45.5968
AVAEQIPLLVQGVR	2	14	1522	68.4352	NA	NA	0.953368	0.955071	68.5289	68.5417	66.6704	70.413
AVAFQNPQTHVIENLHAAAYR	3	21	1523	54.9276	NA	NA	0.707775	0.706961	54.8828	54.9128	53.0416	56.784
AVAFQNPQTHVIENLHAAAYR	4	21	1524	54.9043	NA	NA	0.707352	0.706961	54.8828	54.9128	53.0416	56.784
AVAGDASESALLK	2	13	1526	44.7424	NA	NA	0.522589	0.528683	45.0776	45.1199	43.2488	46.9911
AVAGNISDPGLQK	2	13	1527	40.8756	NA	NA	0.452283	0.463537	41.4945	41.5414	39.6702	43.4126
AVAHHTDCTFIR	3	12	1529	29.109	Carbamidomethyl@C	8	0.238345	0.238449	29.1147	29.1772	27.3059	31.0485
AVAHHTTAAFIR	2	12	1530	28.0242	NA	NA	0.218621	0.208958	27.4927	27.5573	25.6859	29.4286
AVAHHTTAAFIR	3	12	1531	28.0524	NA	NA	0.219135	0.208958	27.4927	27.5573	25.6859	29.4286
AVAISLPK	2	8	1533	47.0527	NA	NA	0.564595	0.554134	46.4774	46.518	44.6468	48.3892
AVALYFIDK	2	9	1534	62.2486	NA	NA	0.840884	0.870989	63.9044	63.923	62.0517	65.7942
AVANYDSVEEGEK	2	13	1535	37.9658	NA	NA	0.399379	0.392411	37.5826	37.6344	35.7632	39.5057
AVAQAGTVGTLLIVK	2	15	1536	62.6292	NA	NA	0.847803	0.848502	62.6676	62.6878	60.8165	64.559
AVAQALEVIPR	2	11	1537	56.5225	NA	NA	0.736772	0.735882	56.4735	56.5015	54.6303	58.3727
AVASAAAALVLK	2	12	1538	56.051	NA	NA	0.728199	0.747552	57.1153	57.1425	55.2713	59.0137
AVASQLDCNFLK	2	12	1539	56.6101	Carbamidomethyl@C	8	0.738366	0.758891	57.739	57.7654	55.8942	59.6366
AVAVVVDPIQSVK	2	13	1540	57.898	NA	NA	0.761781	0.764428	58.0436	58.0696	56.1984	59.9408
AVCLLTGASR	2	10	1541	44.0177	Carbamidomethyl@C	3	0.509412	0.499475	43.4711	43.5155	41.6443	45.3867
AVCMLSNTTAIAEAWAR	2	17	1542	73.053	Carbamidomethyl@C	3	1.03733	1.03211	72.7663	72.7737	70.9024	74.6451
AVCMLSNTTAVAEAWAR	2	17	1544	70.753	Carbamidomethyl@C	3	0.995509	1.00254	71.1395	71.149	69.2776	73.0203
AVCMLSNTTAVAEAWAR	3	17	1545	70.7832	Carbamidomethyl@C	3	0.996059	1.00254	71.1395	71.149	69.2776	73.0203
AVCMLSNTTAIAEAWAR	2	17	1546	66.9799	Carbamidomethyl@C;Oxidation@M	3;4	0.926907	0.937784	67.5781	67.5921	65.7208	69.4634
AVCMLSNTTAVAEAWAR	2	17	1547	62.6292	Carbamidomethyl@C;Oxidation@M	3;4	0.847803	0.85446	62.9953	63.015	61.1438	64.8863
AVDALLTHCK	2	10	1548	36.9958	Carbamidomethyl@C	9	0.381742	0.393795	37.6587	37.7104	35.8392	39.5817
AVDCLLDSK	2	9	1549	43.3549	Carbamidomethyl@C	4	0.497362	0.490534	42.9794	43.0244	41.1532	44.8956
AVDDGVNTFK	2	10	1550	39.9148	NA	NA	0.434815	0.416247	38.8936	38.9438	37.0725	40.815
AVDDLNLHSYSNLPIWVNK	3	19	1551	72.7285	NA	NA	1.03143	1.01654	71.9096	71.9181	70.0467	73.7895
AVDFAER	2	7	1553	34.2123	NA	NA	0.331133	0.33862	34.6241	34.6797	32.8084	36.5509
AVDIPHMDIEALK	2	13	1554	63.2996	NA	NA	0.859992	0.875964	64.178	64.1963	62.3251	66.0676
AVDIPHMDIEALK	3	13	1555	63.2996	NA	NA	0.859992	0.875964	64.178	64.1963	62.3251	66.0676
AVDIPHMDIEALK	2	13	1556	51.678	Oxidation@M	7	0.64869	0.65103	51.8066	51.8405	49.9693	53.7117
AVDIPHMDIEALK	3	13	1557	51.6531	Oxidation@M	7	0.648238	0.65103	51.8066	51.8405	49.9693	53.7117
AVDLIQK	2	7	1558	36.3364	NA	NA	0.369752	0.374961	36.6229	36.6759	34.8047	38.5471
AVDPEDDFQR	2	10	1561	42.6941	NA	NA	0.485347	0.489572	42.9265	42.9716	41.1004	44.8428
AVDPSSVALVTLGSSK	2	16	1562	64.5834	NA	NA	0.883335	0.862395	63.4317	63.4509	61.5797	65.3222
AVDPTSGQLYGLAR	2	14	1563	56.3292	NA	NA	0.733258	0.726622	55.9642	55.9929	54.1217	57.864
AVDSLVPIGR	2	10	1564	53.6437	NA	NA	0.68443	0.686532	53.7593	53.7907	51.9195	55.6619
AVDSQILPK	2	9	1565	41.99	NA	NA	0.472545	0.47669	42.218	42.264	40.3927	44.1352
AVDVLAK	2	7	1568	31.6983	NA	NA	0.285424	0.310876	33.0982	33.1557	31.2844	35.027
AVEFLASNESR	2	11	1570	45.7183	NA	NA	0.540333	0.543187	45.8753	45.9167	44.0455	47.7878
AVEHINK	2	7	1571	18.3251	NA	NA	0.0422739	0.0972826	21.3505	21.4229	19.5514	23.2943
AVELAANTK	2	9	1572	29.7018	NA	NA	0.249124	0.261959	30.4077	30.4686	28.5973	32.3399
AVENSSTAIGIR	2	12	1574	39.4978	NA	NA	0.427233	0.429148	39.6031	39.6524	37.7812	41.5236
AVENYLIQMAR	2	11	1575	63.073	NA	NA	0.855873	0.842529	62.3391	62.3597	60.4884	64.2309
AVESGVPQPPDPPVQR	2	16	1578	49.0439	NA	NA	0.600799	0.620073	50.104	50.14	48.2689	52.0112
AVEVQGPSLESGDHGK	2	16	1581	37.4967	NA	NA	0.390848	0.405873	38.323	38.3739	36.5027	40.2451
AVEYLLMGIPGDR	2	13	1582	72.7285	NA	NA	1.03143	1.0245	72.3477	72.3557	70.4843	74.227
AVFDETYPDPVR	2	12	1583	57.6671	NA	NA	0.757584	0.755434	57.5489	57.5755	55.7043	59.4467
AVFPSIVGR	2	9	1584	55.9957	NA	NA	0.727194	0.728432	56.0638	56.0923	54.2211	57.9635
AVFPSIVGRPR	2	11	1585	48.007	NA	NA	0.581946	0.580176	47.9097	47.9485	46.0773	49.8197
AVFPSIVGRPR	3	11	1586	48.007	NA	NA	0.581946	0.580176	47.9097	47.9485	46.0773	49.8197
AVFQANQENLPILK	2	14	1587	63.8633	NA	NA	0.870242	0.868859	63.7872	63.806	61.9348	65.6773
AVFVDLEPTVIDEVR	2	15	1590	73.1147	NA	NA	1.03845	1.04016	73.2087	73.2156	71.3442	75.087
AVFWDIK	2	7	1592	61.3738	NA	NA	0.824978	0.817118	60.9415	60.9638	59.0926	62.8351
AVGDGILCNTYIDSYK	2	16	1593	67.3247	Carbamidomethyl@C	8	0.933177	0.908337	65.9586	65.9746	64.1033	67.8458
AVGIWHCGSCMK	2	12	1595	40.71	Carbamidomethyl@C;Carbamidomethyl@C	7;10	0.449273	0.447261	40.5994	40.6474	38.7762	42.5186
AVGIWHCGSCMK	2	12	1597	35.41	Carbamidomethyl@C;Carbamidomethyl@C;Oxidation@M	7;10;11	0.352909	0.359157	35.7536	35.8078	33.9365	37.679
AVGPEITK	2	8	1599	31.3459	NA	NA	0.279015	0.263884	30.5136	30.5744	28.703	32.4457
AVGTQTLSGAGLLK	2	14	1600	54.2221	NA	NA	0.694948	0.698949	54.4422	54.4728	52.6016	56.3439
AVIELLEK	2	8	1602	55.5318	NA	NA	0.718759	0.700964	54.553	54.5834	52.7123	56.4546
AVIGIGIEEEDRK	2	13	1604	46.2429	NA	NA	0.549871	0.55553	46.5542	46.5947	44.7235	48.4659
AVINSAGYK	2	9	1605	32.3511	NA	NA	0.297292	0.296647	32.3156	32.3741	30.5028	34.2454
AVLASMDNENMHTPDIGGQGTTSEAIQDVIR	3	31	1607	70.5302	NA	NA	0.991457	0.993854	70.662	70.672	68.8007	72.5434
AVLCPPPVK	2	9	1608	41.6662	Carbamidomethyl@C	4	0.466659	0.468917	41.7904	41.837	39.9657	43.7082
AVLEALGSCLNNK	2	13	1609	56.9168	Carbamidomethyl@C	9	0.743941	0.739889	56.6939	56.7216	54.8504	58.5928
AVLFCLSEDK	2	10	1610	58.505	Carbamidomethyl@C	5	0.772817	0.76968	58.3324	58.3581	56.4868	60.2293
AVLFCLSEDKK	3	11	1612	48.1752	Carbamidomethyl@C	5	0.585004	0.601209	49.0665	49.1038	47.2327	50.975
AVLGEVVLYSGAR	2	13	1614	62.6611	NA	NA	0.848384	0.846934	62.5814	62.6016	60.7304	64.4729
AVLHVALR	2	8	1616	37.918	NA	NA	0.39851	0.398169	37.8993	37.9507	36.0795	39.822
AVLIAGQPGTGK	2	12	1617	39.3891	NA	NA	0.425256	0.424154	39.3285	39.3781	37.5069	41.2493
AVLLAGPPGTGK	2	12	1618	46.1889	NA	NA	0.548889	0.546875	46.0781	46.1192	44.248	47.9904
AVLLGPPGAGK	2	11	1620	44.6054	NA	NA	0.520098	0.522961	44.7629	44.8056	42.9344	46.6768
AVLLVGLCDSGK	2	12	1621	59.3026	Carbamidomethyl@C	8	0.787319	0.793913	59.6652	59.6892	57.818	61.5604
AVLMEKPDVVVGTPSR	2	16	1622	50.2175	NA	NA	0.622136	0.620402	50.1221	50.1581	48.287	52.0293
AVLNPTNADILIETK	2	15	1623	65.1855	NA	NA	0.894282	0.889075	64.8991	64.9165	63.0452	66.7877
AVLNPTPIK	2	9	1624	42.5933	NA	NA	0.483515	0.488893	42.8891	42.9342	41.063	44.8054
AVLQSMSGR	2	9	1625	34.802	NA	NA	0.341854	0.34023	34.7127	34.7681	32.8969	36.6394
AVLQWTK	2	7	1626	44.5541	NA	NA	0.519166	0.508282	43.9555	43.9993	42.1281	45.8705
AVLSAEQLRDEEVHAGLGELLR	3	22	1627	68.8465	NA	NA	0.960846	0.961164	68.864	68.8764	67.005	70.7477
AVLSAEQLRDEEVHAGLGELLR	4	22	1628	68.8776	NA	NA	0.961411	0.961164	68.864	68.8764	67.005	70.7477
AVLTFALDSVER	2	12	1629	69.4456	NA	NA	0.971738	0.977404	69.7572	69.7684	67.8971	71.6397
AVLVDLEPGTMDSVR	2	15	1630	65.9011	NA	NA	0.907293	0.910395	66.0717	66.0876	64.2163	67.9589
AVLVDLEPGTMDSVR	3	15	1631	65.9011	NA	NA	0.907293	0.910395	66.0717	66.0876	64.2163	67.9589
AVLVDLEPGTMDSVR	2	15	1632	58.9624	Oxidation@M	11	0.781134	0.796035	59.7819	59.8058	57.9345	61.677
AVMESINPHK	2	10	1633	31.893	NA	NA	0.288964	0.291712	32.0441	32.103	30.2317	33.9743
AVMNFVVR	2	8	1634	52.4714	NA	NA	0.663117	0.670283	52.8656	52.8981	51.0269	54.7693
AVMVSNILLINK	2	12	1636	68.1307	NA	NA	0.94783	0.964873	69.068	69.0801	67.2088	70.9514
AVNDVNGLK	2	9	1637	31.4046	NA	NA	0.280083	0.292136	32.0675	32.1263	30.255	33.9976
AVNTLNEALEFAK	2	13	1638	64.8543	NA	NA	0.888259	0.888487	64.8668	64.8842	63.0129	66.7555
AVNYFSK	2	7	1639	36.0152	NA	NA	0.363913	0.382179	37.0198	37.0724	35.2011	38.9436
AVPGGAGDASVLPSLPR	2	17	1640	61.1373	NA	NA	0.820679	0.82234	61.2287	61.2507	59.3795	63.1219
AVPLIHQEGNR	2	11	1642	33.0667	NA	NA	0.310303	0.308183	32.95	33.0077	31.1364	34.879
AVPSWFVR	2	8	1643	58.708	NA	NA	0.776509	0.815493	60.8521	60.8746	59.0033	62.7458
AVPVESPVQK	2	10	1644	36.4764	NA	NA	0.372299	0.362447	35.9346	35.9885	34.1173	37.8598
AVQAQGGESQQEAQR	2	15	1645	24.8882	NA	NA	0.161604	0.167536	25.2145	25.2819	23.4105	27.1533
AVQDLCGWR	2	9	1646	48.9857	Carbamidomethyl@C	6	0.599739	0.585174	48.1846	48.223	46.3518	50.0942
AVQELVHPVVDR	2	12	1647	43.4952	NA	NA	0.499913	0.504236	43.733	43.7771	41.9059	45.6483
AVQGFFTSNNATR	2	13	1650	48.1473	NA	NA	0.584496	0.568945	47.292	47.3316	45.4604	49.2028
AVQGGGATPVVGAVQGPVPGMPPMTQAPR	2	29	1651	67.7533	NA	NA	0.940969	0.940815	67.7448	67.7586	65.8873	69.6299
AVQGGGATPVVGAVQGPVPGMPPMTQAPR	3	29	1652	67.8123	NA	NA	0.942041	0.940815	67.7448	67.7586	65.8873	69.6299
AVQGMLDFDYVCSR	2	14	1653	69.1558	Carbamidomethyl@C	12	0.966469	0.970781	69.393	69.4047	67.5333	71.276
AVSDWIDEQEK	2	11	1655	53.5881	NA	NA	0.683421	0.639008	51.1455	51.1802	49.309	53.0514
AVSEEQQPALK	2	11	1657	32.514	NA	NA	0.300255	0.303826	32.7104	32.7684	30.8971	34.6397
AVSISTEPPTYLR	2	13	1658	55.4421	NA	NA	0.717129	0.719629	55.5796	55.6087	53.7375	57.4799
AVTELNEPLSNEDR	2	14	1662	47.2629	NA	NA	0.568416	0.569705	47.3338	47.3733	45.5021	49.2445
AVTEQGAELSNEER	2	14	1663	36.7395	NA	NA	0.377082	0.374694	36.6082	36.6612	34.79	38.5325
AVTEQGHELSNEER	2	14	1664	29.534	NA	NA	0.246073	0.236234	28.9929	29.0555	27.1842	30.9269
AVTEQGHELSNEER	3	14	1665	29.534	NA	NA	0.246073	0.236234	28.9929	29.0555	27.1842	30.9269
AVTGTHTLALAAK	2	13	1666	35.8771	NA	NA	0.361401	0.36797	36.2384	36.2919	34.4206	38.1631
AVTIFIR	2	7	1667	52.2756	NA	NA	0.659557	0.662102	52.4156	52.4487	50.5775	54.3199
AVTLHDQGTAQWADLSSQFYLR	3	22	1668	72.9665	NA	NA	1.03575	1.02758	72.5166	72.5244	70.653	74.3957
AVTQALNR	2	8	1672	28.9599	NA	NA	0.235635	0.230725	28.6899	28.7529	26.8816	30.6243
AVVGVVAGGGR	2	11	1673	35.6292	NA	NA	0.356894	0.358199	35.7009	35.7551	33.8839	37.6264
AVVIVDDR	2	8	1674	37.9383	NA	NA	0.398879	0.402593	38.1426	38.1937	36.3225	40.065
AVVLMGK	2	7	1676	36.3098	NA	NA	0.369268	0.38271	37.049	37.1015	35.2303	38.9728
AVVQVFEGTSGIDAK	2	15	1678	57.4668	NA	NA	0.753941	0.766011	58.1306	58.1565	56.2853	60.0277
AVVVNAAQLASYSQSK	2	16	1679	56.0262	NA	NA	0.727749	0.714378	55.2908	55.3203	53.4491	57.1915
AVVVPWGSCHFLEK	3	14	1680	62.4838	Carbamidomethyl@C	9	0.84516	0.839454	62.17	62.1908	60.3195	64.062
AVWLPAVK	2	8	1681	56.0262	NA	NA	0.727749	0.709233	55.0078	55.0376	53.1665	56.9088
AVYSTNCPVWEEAFR	2	15	1683	69.9412	Carbamidomethyl@C	7	0.980749	0.98087	69.9478	69.9588	68.0875	71.8301
AWDIAIATMK	2	10	1684	65.3369	NA	NA	0.897034	0.881317	64.4724	64.4903	62.6191	66.3616
AWEEYYK	2	7	1685	45.8285	NA	NA	0.542336	0.536611	45.5136	45.5554	43.6843	47.4266
AWEVDTCR	2	8	1686	40.5474	Carbamidomethyl@C	7	0.446316	0.453644	40.9504	40.998	39.1268	42.8692
AWGAVVPLVGK	2	11	1687	63.5935	NA	NA	0.865336	0.861188	63.3654	63.3846	61.5134	65.2559
AWGPGLEGGVVGK	2	13	1688	54.7679	NA	NA	0.70487	0.704695	54.7582	54.7884	52.9172	56.6595
AWGPGLHGGIVGR	2	13	1689	47.6159	NA	NA	0.574835	0.575285	47.6407	47.6798	45.8086	49.551
AWGPGLHGGIVGR	3	13	1690	47.5916	NA	NA	0.574392	0.575285	47.6407	47.6798	45.8086	49.551
AWTQVLLGQAEDK	2	13	1691	65.0894	NA	NA	0.892535	0.897617	65.369	65.3857	63.5145	67.257
AWTVEQLR	2	8	1692	51.5714	NA	NA	0.646752	0.633004	50.8152	50.8503	48.9792	52.7215
AWTVLTEYYK	2	10	1693	66.0488	NA	NA	0.909979	0.912056	66.1631	66.1788	64.3076	68.0501
AWYPLGR	2	7	1694	53.2662	NA	NA	0.677567	0.706746	54.871	54.901	53.0298	56.7722
AYAALAALEK	2	10	1695	53.5353	NA	NA	0.682459	0.688082	53.8445	53.8758	52.0046	55.747
AYADFYR	2	7	1697	44.8975	NA	NA	0.525408	0.537895	45.5842	45.626	43.7548	47.4972
AYAQGISR	2	8	1698	28.8741	NA	NA	0.234074	0.234509	28.898	28.9608	27.0895	30.8322
AYCEGCYVATLEK	2	13	1699	51.462	Carbamidomethyl@C;Carbamidomethyl@C	3;6	0.644763	0.647833	51.6308	51.6649	49.7937	53.5361
AYEFAER	2	7	1703	37.2186	NA	NA	0.385793	0.384457	37.1452	37.1975	35.3263	39.0688
AYEQLGQR	2	8	1704	31.1794	NA	NA	0.275988	0.268161	30.7489	30.8093	28.938	32.6807
AYGPGLEK	2	8	1708	32.982	NA	NA	0.308764	0.294488	32.1968	32.2555	30.3842	34.1268
AYHEQLSVAEITNACFEPANQMVK	2	24	1709	67.1684	Carbamidomethyl@C	15	0.930334	0.929844	67.1414	67.1559	65.2846	69.0272
AYHEQLSVAEITNACFEPANQMVK	3	24	1710	67.1684	Carbamidomethyl@C	15	0.930334	0.929844	67.1414	67.1559	65.2846	69.0272
AYHEQLSVAEITNACFEPANQMVK	3	24	1711	62.6906	Carbamidomethyl@C;Oxidation@M	15;22	0.848921	0.848366	62.6601	62.6803	60.8091	64.5515
AYHEQLTVAEITNACFEPANQMVK	2	24	1712	67.5659	Carbamidomethyl@C	15	0.937562	0.938084	67.5946	67.6085	65.7373	69.4798
AYHEQLTVAEITNACFEPANQMVK	3	24	1713	67.5659	Carbamidomethyl@C	15	0.937562	0.938084	67.5946	67.6085	65.7373	69.4798
AYILNLVK	2	8	1716	59.45	NA	NA	0.79	0.801558	60.0857	60.1091	58.2379	61.9804
AYLEGTCVEWLR	2	12	1718	67.5659	Carbamidomethyl@C	7	0.937562	0.935364	67.445	67.4591	65.5878	69.3304
AYLESFYK	2	8	1719	54.2221	NA	NA	0.694948	0.693882	54.1635	54.1944	52.3232	56.0656
AYLPQELLGK	2	10	1720	61.7509	NA	NA	0.831835	0.812724	60.6998	60.7225	58.8512	62.5937
AYLPVNESFGFTADLR	2	16	1721	73.0939	NA	NA	1.03807	1.04131	73.2723	73.2791	71.4077	75.1505
AYLQQLR	2	7	1723	40.6284	NA	NA	0.44779	0.451522	40.8337	40.8814	39.0102	42.7527
AYSDPSTGEPATYGELQQR	2	19	1725	49.7377	NA	NA	0.613413	0.614099	49.7754	49.8119	47.9407	51.6831
AYSDQAIVNLLK	2	12	1726	69.2185	NA	NA	0.967609	0.968977	69.2937	69.3055	67.4342	71.1769
AYSEAHEISK	2	10	1727	25.6563	NA	NA	0.17557	0.179523	25.8738	25.9404	24.069	27.8118
AYTGFSSNSER	2	11	1730	34.1324	NA	NA	0.32968	0.333739	34.3556	34.4115	32.5403	36.2828
AYTNFDAER	2	9	1731	38.756	NA	NA	0.413745	0.403001	38.165	38.2161	36.3449	40.0874
AYTNFDAERDALNIETAIK	2	19	1732	68.3466	NA	NA	0.951756	0.939537	67.6745	67.6884	65.8171	69.5597
AYTNFDAERDALNIETAIK	3	19	1733	68.3124	NA	NA	0.951135	0.939537	67.6745	67.6884	65.8171	69.5597
AYTPPEDLQSR	2	11	1734	41.089	NA	NA	0.456163	0.467098	41.6904	41.737	39.8658	43.6082
AYVAVDGIPQGVLER	2	15	1735	65.2724	NA	NA	0.895862	0.890453	64.9749	64.9922	63.1209	66.8634
AYVSTLMGVPGR	2	12	1738	57.0885	NA	NA	0.747064	0.749975	57.2486	57.2756	55.4044	59.1468
CAADLGLNK	2	9	1740	36.5813	Carbamidomethyl@C	1	0.374206	0.377317	36.7524	36.8053	34.9341	38.6766
CADVTLEGQVYPGK	2	14	1741	50.9879	Carbamidomethyl@C	1	0.636145	0.634332	50.8882	50.9233	49.0521	52.7945
CADYVVTGAWSAK	2	13	1742	54.6583	Carbamidomethyl@C	1	0.702878	0.711148	55.1132	55.1429	53.2717	57.0141
CAGIDVR	2	7	1743	30.9213	Carbamidomethyl@C	1	0.271296	0.266417	30.6529	30.7135	28.8422	32.5848
CAGNEDIITLR	2	11	1744	50.5155	Carbamidomethyl@C	1	0.627555	0.628273	50.555	50.5905	48.7193	52.4617
CAGPTPEAELQALAR	2	15	1745	63.5091	Carbamidomethyl@C	1	0.863802	0.870964	63.903	63.9216	62.0504	65.7929
CALDFFR	2	7	1746	62.8029	Carbamidomethyl@C	1	0.850962	0.853874	62.9631	62.9829	61.1116	64.8541
CASQSGMTAYGTR	2	13	1750	33.1523	Carbamidomethyl@C	1	0.311859	0.30669	32.868	32.9258	31.0545	34.797
CATITPDEK	2	9	1751	28.8741	Carbamidomethyl@C	1	0.234074	0.233392	28.8365	28.8994	27.0281	30.7708
CAVVDVPFGGAK	2	12	1752	54.4943	Carbamidomethyl@C	1	0.699897	0.715207	55.3364	55.3658	53.4946	57.237
CCLTYCFNKPEDK	2	13	1753	44.5794	Carbamidomethyl@C;Carbamidomethyl@C;Carbamidomethyl@C	1;2;6	0.519626	0.509369	44.0153	44.059	42.1878	45.9302
CCLTYCFNKPEDK	3	13	1754	44.5794	Carbamidomethyl@C;Carbamidomethyl@C;Carbamidomethyl@C	1;2;6	0.519626	0.509369	44.0153	44.059	42.1878	45.9302
CCSGAIIVLTK	2	11	1756	50.2175	Carbamidomethyl@C;Carbamidomethyl@C	1;2	0.622136	0.639234	51.1579	51.1926	49.3214	53.0637
CCTESLVNR	2	9	1757	33.3499	Carbamidomethyl@C;Carbamidomethyl@C	1;2	0.315453	0.302524	32.6388	32.6969	30.8256	34.5682
CDENILWLDYK	2	11	1760	71.2778	Carbamidomethyl@C	1	1.00505	0.996215	70.7918	70.8017	68.9304	72.6731
CDEPILSNR	2	9	1761	38.1821	Carbamidomethyl@C	1	0.403312	0.40687	38.3779	38.4287	36.5575	40.2999
CDFPIMK	2	7	1762	49.871	Carbamidomethyl@C	1	0.615837	0.634067	50.8737	50.9088	49.0376	52.7799
CDFTQMSQYFK	2	11	1763	68.0054	Carbamidomethyl@C	1	0.945553	0.907743	65.9259	65.9419	64.0707	67.8132
CDLEDER	2	7	1764	29.2239	Carbamidomethyl@C	1	0.240434	0.231131	28.7122	28.7752	26.9039	30.6466
CDMEVSCPDGYTCCR	2	15	1765	46.9395	Carbamidomethyl@C;Carbamidomethyl@C;Carbamidomethyl@C;Carbamidomethyl@C	1;7;13;14	0.562536	0.580442	47.9243	47.9631	46.0919	49.8343
CDPAGYYCGFK	2	11	1766	50.3576	Carbamidomethyl@C;Carbamidomethyl@C	1;8	0.624684	0.628045	50.5425	50.578	48.7068	52.4491
CDSSPDSAEDVR	2	12	1768	30.176	Carbamidomethyl@C	1	0.257746	0.251265	29.8196	29.8812	28.0099	31.7525
CDSSPDSAEDVRK	2	13	1769	25.8292	Carbamidomethyl@C	1	0.178712	0.176836	25.726	25.7928	23.9214	27.6642
CDSSPDSAEDVRK	3	13	1770	25.8292	Carbamidomethyl@C	1	0.178712	0.176836	25.726	25.7928	23.9214	27.6642
CDSWWAK	2	7	1771	47.9171	Carbamidomethyl@C	1	0.580311	0.585155	48.1835	48.222	46.3508	50.0932
CDVTDNQSEVADK	2	13	1772	32.205	Carbamidomethyl@C	1	0.294637	0.300933	32.5513	32.6095	30.7382	34.4808
CDYMDEVTYGELEK	2	14	1775	64.6128	Carbamidomethyl@C	1	0.883869	0.864875	63.5681	63.5872	61.7159	65.4584
CEASGKPEVQFR	2	12	1776	33.5586	Carbamidomethyl@C	1	0.319247	0.327231	33.9977	34.054	32.1828	35.9253
CEAVVADVLDK	2	11	1777	53.8838	Carbamidomethyl@C	1	0.688795	0.688176	53.8497	53.881	52.0098	55.7522
CEDLETQTQSEK	2	12	1778	31.2093	Carbamidomethyl@C	1	0.276534	0.275256	31.1391	31.199	29.3277	33.0703
CEDPTSYMEVAK	2	12	1779	51.325	Carbamidomethyl@C	1	0.642273	0.639683	51.1826	51.2172	49.346	53.0884
CEELLEK	2	7	1780	34.0759	Carbamidomethyl@C	1	0.328653	0.318769	33.5323	33.5892	31.718	35.4605
CEESFVK	2	7	1781	31.3459	Carbamidomethyl@C	1	0.279015	0.289741	31.9357	31.9947	30.1234	33.866
CEFAVGYQR	2	9	1782	44.4974	Carbamidomethyl@C	1	0.518135	0.50544	43.7992	43.8432	41.972	45.7144
CEFQDAYVLLSEK	2	13	1783	70.5302	Carbamidomethyl@C	1	0.991457	0.980715	69.9393	69.9503	68.079	71.8217
CEGFVCAQTGR	2	11	1784	38.1006	Carbamidomethyl@C;Carbamidomethyl@C	1;6	0.401828	0.39022	37.4621	37.5141	35.6428	39.3853
CEGINISGNFYR	2	12	1785	57.3791	Carbamidomethyl@C	1	0.752347	0.756776	57.6227	57.6492	55.778	59.5204
CELLSDDSLAVSSPR	2	15	1787	59.0753	Carbamidomethyl@C	1	0.783187	0.772068	58.4637	58.4892	56.618	60.3604
CELLYEGPPDDEAAMGIK	2	18	1788	66.7307	Carbamidomethyl@C	1	0.922376	0.919435	66.5689	66.5842	64.7129	68.4555
CELLYEGPPDDEAAMGIK	3	18	1789	66.7307	Carbamidomethyl@C	1	0.922376	0.919435	66.5689	66.5842	64.7129	68.4555
CEMASTGEVACFGEGIHTAFLK	2	22	1792	68.6566	Carbamidomethyl@C;Carbamidomethyl@C	1;11	0.957393	0.968804	69.2842	69.2961	67.4247	71.1674
CEMASTGEVACFGEGIHTAFLK	3	22	1793	68.6566	Carbamidomethyl@C;Carbamidomethyl@C	1;11	0.957393	0.968804	69.2842	69.2961	67.4247	71.1674
CEMEQQNQEYK	2	11	1794	30.1193	Carbamidomethyl@C	1	0.256714	0.263401	30.487	30.5478	28.6765	32.4191
CESAFLSK	2	8	1795	35.9875	Carbamidomethyl@C	1	0.363408	0.359874	35.793	35.8471	33.9759	37.7184
CESAPGCGVWQR	2	12	1796	42.7247	Carbamidomethyl@C;Carbamidomethyl@C	1;7	0.485904	0.471424	41.9283	41.9747	40.1035	43.8459
CESAPGCGVWQRPVIDNPNYK	2	21	1797	53.6437	Carbamidomethyl@C;Carbamidomethyl@C	1;7	0.68443	0.686136	53.7375	53.7689	51.8977	55.6401
CESAPGCGVWQRPVIDNPNYK	3	21	1798	53.6728	Carbamidomethyl@C;Carbamidomethyl@C	1;7	0.684961	0.686136	53.7375	53.7689	51.8977	55.6401
CETDGTSVLTPWYK	2	14	1799	64.8819	Carbamidomethyl@C	1	0.888761	0.887566	64.8161	64.8336	62.9623	66.7048
CFGTGAAGNR	2	10	1807	28.2254	Carbamidomethyl@C	1	0.222281	0.229192	28.6056	28.6688	26.7974	30.5401
CFIVGADNVGSK	2	12	1809	48.3044	Carbamidomethyl@C	1	0.587353	0.589562	48.4259	48.4641	46.5929	50.3353
CFSEENHEPLR	2	11	1811	34.4127	Carbamidomethyl@C	1	0.334777	0.331231	34.2177	34.2738	32.4025	36.1451
CFSGQCISK	2	9	1812	32.3511	Carbamidomethyl@C;Carbamidomethyl@C	1;6	0.297292	0.301677	32.5922	32.6504	30.7791	34.5217
CFSIDNPGYEPEVVAVHPGGDTVAIGGVDGNVR	3	33	1813	71.8355	Carbamidomethyl@C	1	1.01519	1.01635	71.8994	71.9079	70.0365	73.7792
CGAALAGHQLIR	2	12	1815	38.8167	Carbamidomethyl@C	1	0.414849	0.397593	37.8676	37.9191	36.0478	39.7903
CGDLVFAK	2	8	1817	43.8346	Carbamidomethyl@C	1	0.506084	0.508972	43.9934	44.0372	42.166	45.9084
CGETGHVAINCSK	2	13	1821	27.3641	Carbamidomethyl@C;Carbamidomethyl@C	1;11	0.206619	0.210839	27.5962	27.6606	25.7892	29.532
CGETGHVAINCSK	3	13	1822	27.3641	Carbamidomethyl@C;Carbamidomethyl@C	1;11	0.206619	0.210839	27.5962	27.6606	25.7892	29.532
CGFCHVGEEENEAR	3	14	1823	34.5232	Carbamidomethyl@C;Carbamidomethyl@C	1;4	0.336785	0.336788	34.5233	34.579	32.7077	36.4503
CGLVIGK	2	7	1825	36.4235	Carbamidomethyl@C	1	0.371336	0.380084	36.9046	36.9573	35.0861	38.8285
CGLVIGR	2	7	1826	38.9488	Carbamidomethyl@C	1	0.417251	0.413458	38.7402	38.7906	36.9193	40.6618
CGNQAAIMELDDTLK	2	15	1827	63.357	Carbamidomethyl@C	1	0.861036	0.872077	63.9643	63.9828	62.1115	65.854
CGPLIDLCR	2	9	1828	54.0883	Carbamidomethyl@C;Carbamidomethyl@C	1;8	0.692514	0.684065	53.6236	53.6552	51.784	55.5264
CGPMVLDALIK	2	11	1829	70.1052	Carbamidomethyl@C	1	0.983731	0.976548	69.7101	69.7214	67.8501	71.5927
CGVCEVCQQPECGK	2	14	1830	35.7965	Carbamidomethyl@C;Carbamidomethyl@C;Carbamidomethyl@C;Carbamidomethyl@C	1;4;7;12	0.359936	0.361118	35.8615	35.9155	34.0443	37.7868
CHTPPLYR	2	8	1833	29.6169	Carbamidomethyl@C	1	0.24758	0.245365	29.4951	29.5571	27.6858	31.4285
CHTPPLYR	3	8	1834	29.6431	Carbamidomethyl@C	1	0.248056	0.245365	29.4951	29.5571	27.6858	31.4285
CHVPLAQAQALVTSELEK	3	18	1835	67.4753	Carbamidomethyl@C	1	0.935914	0.90949	66.0219	66.0379	64.1666	67.9092
CIACQCPSK	2	9	1836	26.5478	Carbamidomethyl@C;Carbamidomethyl@C;Carbamidomethyl@C	1;4;6	0.191779	0.185622	26.2092	26.2754	24.404	28.1468
CIAPETLR	2	8	1837	39.3318	Carbamidomethyl@C	1	0.424215	0.42734	39.5037	39.5531	37.6819	41.4243
CIAVGESDGSIWNPDGIDPK	2	20	1838	68.3124	Carbamidomethyl@C	1	0.951135	0.952659	68.3962	68.4092	66.5379	70.2805
CIDLEPDNATTYVHK	3	15	1839	50.9061	Carbamidomethyl@C	1	0.634656	0.631502	50.7326	50.7678	48.8967	52.639
CIESLIAVFQK	2	11	1841	73.135	Carbamidomethyl@C	1	1.03882	1.03928	73.1607	73.1676	71.2962	75.039
CIIPNHEK	2	8	1843	28.5912	Carbamidomethyl@C	1	0.22893	0.219846	28.0915	28.1554	26.284	30.0267
CIIPNHEK	3	8	1844	28.5912	Carbamidomethyl@C	1	0.22893	0.219846	28.0915	28.1554	26.284	30.0267
CILPFDK	2	7	1846	55.3356	Carbamidomethyl@C	1	0.715193	0.744986	56.9742	57.0016	55.1304	58.8728
CILQDGR	2	7	1847	33.4374	Carbamidomethyl@C	1	0.317043	0.310308	33.067	33.1245	31.2532	34.9958
CIPALDSLTPANEDQK	2	16	1848	60.5883	Carbamidomethyl@C	1	0.810697	0.804836	60.266	60.2892	58.4179	62.1604
CIQMWFDPAQGNPNEEVAR	2	19	1849	71.4397	Carbamidomethyl@C	1	1.008	1.0028	71.1538	71.1632	69.2919	73.0346
CIYFEAK	2	7	1854	42.9384	Carbamidomethyl@C	1	0.489788	0.500664	43.5365	43.5808	41.7096	45.452
CLAFECPENYR	2	11	1856	53.9115	Carbamidomethyl@C;Carbamidomethyl@C	1;6	0.6893	0.676381	53.2009	53.2331	51.3619	55.1043
CLAFHDISPQAPTHFLVIPK	3	20	1857	67.3554	Carbamidomethyl@C	1	0.933734	0.932265	67.2746	67.2889	65.4176	69.1602
CLAFHDISPQAPTHFLVIPK	4	20	1858	67.3827	Carbamidomethyl@C	1	0.93423	0.932265	67.2746	67.2889	65.4176	69.1602
CLATGPGIASTVK	2	13	1859	44.4724	Carbamidomethyl@C	1	0.51768	0.513605	44.2483	44.2917	42.4205	46.1629
CLDEFPNLK	2	9	1860	55.62	Carbamidomethyl@C	1	0.720364	0.731773	56.2475	56.2758	54.4046	58.147
CLEEFELLGK	2	10	1861	66.7623	Carbamidomethyl@C	1	0.922951	0.937911	67.5851	67.5991	65.7278	69.4704
CLEEQGLK	2	8	1862	32.5709	Carbamidomethyl@C	1	0.30129	0.31886	33.5373	33.5942	31.723	35.4655
CLFQSPLFAK	2	10	1864	67.689	Carbamidomethyl@C	1	0.939799	0.945775	68.0176	68.031	66.1597	69.9023
CLMDQATDPNILGR	2	14	1867	61.9518	Carbamidomethyl@C	1	0.835487	0.833101	61.8206	61.8418	59.9706	63.713
CLQTLLDTK	2	9	1869	51.462	Carbamidomethyl@C	1	0.644763	0.641354	51.2745	51.309	49.4379	53.1802
CLSSATDPQTK	2	11	1871	28.5053	Carbamidomethyl@C	1	0.227368	0.241746	29.296	29.3583	27.487	31.2297
CLSVMEAK	2	8	1872	37.9383	Carbamidomethyl@C	1	0.398879	0.40993	38.5462	38.5968	36.7256	40.468
CLTAIVK	2	7	1873	39.0249	Carbamidomethyl@C	1	0.418634	0.40952	38.5236	38.5743	36.703	40.4455
CLTTDEYDGHSTYPSHQYQ	2	19	1874	44.2049	Carbamidomethyl@C	1	0.512816	0.492348	43.0792	43.1241	41.2529	44.9953
CLTTDEYDGHSTYPSHQYQ	3	19	1875	44.2611	Carbamidomethyl@C	1	0.513839	0.492348	43.0792	43.1241	41.2529	44.9953
CLYASVLTAQPR	2	12	1876	56.2698	Carbamidomethyl@C	1	0.732179	0.755983	57.579	57.6056	55.7344	59.4768
CMMAQYNR	2	8	1878	34.6659	Carbamidomethyl@C	1	0.339381	0.332796	34.3038	34.3597	32.4885	36.231
CMPTFQFFK	2	9	1879	70.4326	Carbamidomethyl@C	1	0.989684	1.00777	71.4276	71.4367	69.5654	73.3081
CMQLTDFILK	2	10	1880	73.1147	Carbamidomethyl@C	1	1.03845	1.03036	72.6698	72.6774	70.806	74.5488
CMPTFQFFK	2	9	1881	62.3949	Carbamidomethyl@C;Oxidation@M	1;2	0.843543	0.841276	62.2702	62.2909	60.4196	64.1621
CMQLTDFILK	2	10	1882	66.3278	Carbamidomethyl@C;Oxidation@M	1;2	0.91505	0.885777	64.7177	64.7353	62.8641	66.6066
CNELQDIEK	2	9	1883	40.7363	Carbamidomethyl@C	1	0.44975	0.465468	41.6007	41.6475	39.7763	43.5187
CNEPAVWSQLAK	2	12	1884	56.4387	Carbamidomethyl@C	1	0.735249	0.776585	58.7122	58.7373	56.8661	60.6086
CNGVLEGIR	2	9	1885	43.3822	Carbamidomethyl@C	1	0.497859	0.511881	44.1535	44.197	42.3258	46.0682
CNLLAEK	2	7	1886	33.837	Carbamidomethyl@C	1	0.324309	0.332301	34.2765	34.3325	32.4613	36.2038
CNLVPTDEITVYYK	2	14	1887	66.4185	Carbamidomethyl@C	1	0.916701	0.921075	66.6591	66.6743	64.803	68.5455
CNNVLYIR	2	8	1888	45.2364	Carbamidomethyl@C	1	0.53157	0.526121	44.9366	44.9792	43.108	46.8504
CNSLEEIK	2	8	1889	35.3231	Carbamidomethyl@C	1	0.35133	0.351413	35.3277	35.3824	33.5111	37.2536
CNTCGEPITDR	2	11	1890	31.2093	Carbamidomethyl@C;Carbamidomethyl@C	1;4	0.276534	0.268684	30.7776	30.838	28.9667	32.7094
CNTNTAIELK	2	10	1891	37.1365	Carbamidomethyl@C	1	0.384301	0.399041	37.9473	37.9986	36.1274	39.8699
CPEALFQPSFLGMESCGIHETTFNSIMK	2	28	1893	73.135	Carbamidomethyl@C;Carbamidomethyl@C	1;16	1.03882	1.03617	72.9892	72.9963	71.1249	74.8677
CPEALFQPSFLGMESCGIHETTFNSIMK	3	28	1894	73.135	Carbamidomethyl@C;Carbamidomethyl@C	1;16	1.03882	1.03617	72.9892	72.9963	71.1249	74.8677
CPEALFQPSFLGMESCGIHETTFNSIMK	3	28	1897	73.053	Carbamidomethyl@C;Oxidation@M;Carbamidomethyl@C	1;13;16	1.03733	1.03858	73.1216	73.1286	71.2572	75
CPEALFQPSFLGMESCGIHETTFNSIMK	3	28	1898	72.9392	Carbamidomethyl@C;Oxidation@M;Carbamidomethyl@C;Oxidation@M	1;13;16;27	1.03526	1.03535	72.9443	72.9515	71.0801	74.8229
CPFTGNVSIR	2	10	1900	46.9395	Carbamidomethyl@C	1	0.562536	0.56271	46.9491	46.9891	45.1179	48.8603
CPNLTHLNLSGNK	2	13	1902	43.2769	Carbamidomethyl@C	1	0.495944	0.49681	43.3246	43.3692	41.498	45.2404
CPNLTHLNLSGNK	3	13	1903	43.2769	Carbamidomethyl@C	1	0.495944	0.49681	43.3246	43.3692	41.498	45.2404
CPNLTYLNLSGNK	2	13	1904	58.1313	Carbamidomethyl@C	1	0.766024	0.761799	57.899	57.9252	56.0539	59.7964
CPNPTCENMNFSWR	2	14	1905	58.8206	Carbamidomethyl@C;Carbamidomethyl@C	1;6	0.778556	0.802111	60.1161	60.1395	58.2683	62.0107
CPPGVVPACHNSK	2	13	1906	27.7801	Carbamidomethyl@C;Carbamidomethyl@C	1;9	0.214183	0.240668	29.2367	29.2991	27.4278	31.1704
CPSIAAAIAAVNALHGR	3	17	1909	71.5056	Carbamidomethyl@C	1	1.00919	1.00956	71.5256	71.5346	69.6632	73.4059
CPSIILHDR	2	9	1910	36.0999	Carbamidomethyl@C	1	0.365453	0.364189	36.0304	36.0842	34.2129	37.9554
CPTLEQYAMR	2	10	1911	50.2758	Carbamidomethyl@C	1	0.623196	0.621382	50.176	50.212	48.3408	52.0831
CQLEINFNTLQTK	2	13	1914	64.3488	Carbamidomethyl@C	1	0.879068	0.867453	63.7099	63.7288	61.8575	65.6
CQNEQLQTAVTQQVSQIQQHK	3	21	1915	56.1875	Carbamidomethyl@C	1	0.730682	0.731395	56.2267	56.255	54.3838	58.1262
CQQLAAYGILEK	2	12	1916	56.9168	Carbamidomethyl@C	1	0.743941	0.749651	57.2308	57.2579	55.3867	59.1291
CQSWSSMTPHR	2	11	1917	38.2665	Carbamidomethyl@C	1	0.404846	0.400958	38.0527	38.1039	36.2327	39.9752
CQTVIVQSFLR	2	11	1919	62.6013	Carbamidomethyl@C	1	0.847296	0.848454	62.665	62.6851	60.8139	64.5564
CQVFEETQIGGER	2	13	1920	49.0706	Carbamidomethyl@C	1	0.601283	0.598418	48.913	48.9505	47.0793	50.8217
CRPLEENTADNEK	2	13	1922	26.4449	Carbamidomethyl@C	1	0.189907	0.193883	26.6636	26.7292	24.8578	28.6006
CRPLEENTADNEK	3	13	1923	26.4449	Carbamidomethyl@C	1	0.189907	0.193883	26.6636	26.7292	24.8578	28.6006
CSASCCEDSQASMK	2	14	1924	27.6431	Carbamidomethyl@C;Carbamidomethyl@C;Carbamidomethyl@C	1;5;6	0.211692	0.203522	27.1937	27.2587	25.3873	29.13
CSDAAGYPHATHDLEGPPLDAYSIQGQHTISPLDLAK	5	37	1926	67.2943	Carbamidomethyl@C	1	0.932624	0.93427	67.3848	67.399	65.5278	69.2703
CSDFTEEICR	2	10	1927	47.162	Carbamidomethyl@C;Carbamidomethyl@C	1;9	0.566581	0.557917	46.6854	46.7258	44.8546	48.597
CSDIVFAR	2	8	1928	43.8854	Carbamidomethyl@C	1	0.507007	0.507049	43.8877	43.9316	42.0604	45.8027
CSEGSFLLTTFPR	2	13	1929	70.272	Carbamidomethyl@C	1	0.986763	0.986045	70.2325	70.2431	68.3718	72.1144
CSEGVFLLTTTPR	2	13	1930	63.2996	Carbamidomethyl@C	1	0.859992	0.844665	62.4566	62.477	60.6058	64.3483
CSGPGLSPGMVR	2	12	1931	43.622	Carbamidomethyl@C	1	0.502217	0.49148	43.0314	43.0764	41.2052	44.9476
CSILAAANPAYGR	2	13	1932	52.136	Carbamidomethyl@C	1	0.657019	0.656312	52.0972	52.1307	50.2595	54.0019
CSLPAEEDSVLEK	2	13	1933	50.2758	Carbamidomethyl@C	1	0.623196	0.642105	51.3158	51.3503	49.4791	53.2215
CSQDQGVLASELAQNK	2	16	1935	50.4611	Carbamidomethyl@C	1	0.626565	0.623852	50.3118	50.3476	48.4764	52.2188
CSVLAAANPVYGR	2	13	1938	52.136	Carbamidomethyl@C	1	0.657019	0.659782	52.288	52.3213	50.4501	54.1925
CSVLAAANSVFGR	2	13	1939	65.2473	Carbamidomethyl@C	1	0.895406	0.890673	64.987	65.0043	63.133	66.8755
CTDDFNGAQCK	2	11	1944	29.8048	Carbamidomethyl@C;Carbamidomethyl@C	1;10	0.250997	0.258951	30.2423	30.3034	28.4321	32.1747
CTEDMTEDELR	2	11	1945	41.9343	Carbamidomethyl@C	1	0.471533	0.47716	42.2438	42.2898	40.4186	44.161
CTGGEVGATSALAPK	2	15	1946	40.8206	Carbamidomethyl@C	1	0.451283	0.451999	40.8599	40.9076	39.0364	42.7788
CTLCSQPGATIGCEIK	2	16	1947	51.0131	Carbamidomethyl@C;Carbamidomethyl@C;Carbamidomethyl@C	1;4;13	0.636602	0.625248	50.3886	50.4243	48.5531	52.2955
CTVDVPEDLR	2	10	1948	48.8781	Carbamidomethyl@C	1	0.597783	0.60247	49.1359	49.1731	47.3019	51.0443
CTVFHGAQVEDAFR	2	14	1949	51.0131	Carbamidomethyl@C	1	0.636602	0.646739	51.5706	51.6048	49.7336	53.476
CTVIAAANPIGGR	2	13	1951	48.3044	Carbamidomethyl@C	1	0.587353	0.593262	48.6294	48.6673	46.7961	50.5385
CTYLVLDEADR	2	11	1952	56.2418	Carbamidomethyl@C	1	0.731668	0.714987	55.3243	55.3537	53.4825	57.2249
CVACECDLGGSSSGAEVR	2	18	1953	42.3225	Carbamidomethyl@C;Carbamidomethyl@C;Carbamidomethyl@C	1;4;6	0.478591	0.470927	41.901	41.9474	40.0762	43.8186
CVANNQVETLEK	2	12	1954	38.5726	Carbamidomethyl@C	1	0.410411	0.415159	38.8337	38.884	37.0128	40.7552
CVDFQTLK	2	8	1956	45.8285	Carbamidomethyl@C	1	0.542336	0.539918	45.6955	45.7371	43.8659	47.6083
CVEDPETGLR	2	10	1958	38.8439	Carbamidomethyl@C	1	0.415343	0.416691	38.918	38.9682	37.0969	40.8394
CVFELPAENDKPHDVEINK	3	19	1959	53.0011	Carbamidomethyl@C	1	0.672747	0.67471	53.109	53.1413	51.2701	55.0125
CVFEMPNENDK	2	11	1960	51.6531	Carbamidomethyl@C	1	0.648238	0.624191	50.3305	50.3663	48.4951	52.2374
CVGGVVHSFDGTK	2	13	1961	38.6014	Carbamidomethyl@C	1	0.410934	0.410989	38.6044	38.6549	36.7837	40.5262
CVICGGPGVSDAYYCK	2	16	1962	52.7174	Carbamidomethyl@C;Carbamidomethyl@C;Carbamidomethyl@C	1;4;15	0.667589	0.659727	52.285	52.3182	50.4471	54.1894
CVLDSCR	2	7	1963	30.9513	Carbamidomethyl@C;Carbamidomethyl@C	1;6	0.271842	0.252667	29.8967	29.9582	28.0869	31.8295
CVLLSNLSSTSHVPEVDPGSAELQK	3	25	1964	64.6128	Carbamidomethyl@C	1	0.883869	0.886687	64.7678	64.7853	62.914	66.6565
CVLNEGMPIYR	2	11	1965	56.4649	Carbamidomethyl@C	1	0.735725	0.730693	56.1881	56.2164	54.3452	58.0876
CVPLYHPYQK	2	10	1967	38.2072	Carbamidomethyl@C	1	0.403767	0.405213	38.2867	38.3376	36.4664	40.2089
CVVVGDGAVGK	2	11	1969	36.3098	Carbamidomethyl@C	1	0.369268	0.385409	37.1975	37.2498	35.3786	39.121
CVYTIPAHQNLVTGVK	3	16	1970	51.7317	Carbamidomethyl@C	1	0.649666	0.644803	51.4641	51.4985	49.6273	53.3696
CYEMASHLR	2	9	1973	34.5232	Carbamidomethyl@C	1	0.336785	0.336017	34.4809	34.5367	32.6654	36.4079
CYEMASHLR	3	9	1974	34.5232	Carbamidomethyl@C	1	0.336785	0.336017	34.4809	34.5367	32.6654	36.4079
CYEMASHLR	3	9	1976	27.3641	Carbamidomethyl@C;Oxidation@M	1;4	0.206619	0.208199	27.4509	27.5155	25.6442	29.3869
CYLTMTQALEAR	2	12	1978	60.5321	Carbamidomethyl@C	1	0.809674	0.804075	60.2241	60.2474	58.3762	62.1186
CYSCGEFGHIQK	2	12	1979	38.0702	Carbamidomethyl@C;Carbamidomethyl@C	1;4	0.401276	0.38647	37.2558	37.3081	35.4369	39.1793
CYVQPQWVFDSVNAR	2	15	1981	70.8495	Carbamidomethyl@C	1	0.997265	1.00601	71.3306	71.3399	69.4685	73.2112
CYYFDYK	2	7	1982	51.0131	Carbamidomethyl@C	1	0.636602	0.665407	52.5974	52.6303	50.7591	54.5015
DAAFATLVSDR	2	11	1983	59.5459	NA	NA	0.791744	0.807128	60.3921	60.4151	58.5439	62.2863
DAALATALGDK	2	11	1988	48.3583	NA	NA	0.588332	0.624269	50.3348	50.3705	48.4993	52.2417
DAALATALGDKK	2	12	1989	39.279	NA	NA	0.423254	0.465566	41.6061	41.6529	39.7817	43.5241
DACVISSDFHER	2	12	1994	43.989	Carbamidomethyl@C	3	0.50889	0.521875	44.7031	44.746	42.8748	46.6172
DADAGDEDEESEEPR	2	15	1995	32.5402	NA	NA	0.300731	0.27906	31.3483	31.408	29.5367	33.2793
DADIGVAEAER	2	11	1999	41.773	NA	NA	0.4686	0.471668	41.9417	41.988	40.1168	43.8593
DADLTDTAQTR	2	11	2000	35.3541	NA	NA	0.351893	0.360796	35.8438	35.8978	34.0266	37.7691
DADLWSSHDK	2	10	2001	37.918	NA	NA	0.39851	0.396826	37.8254	37.8769	36.0057	39.7482
DADPILISLR	2	10	2002	68.036	NA	NA	0.94611	0.966153	69.1384	69.1504	67.2791	71.0217
DADPILR	2	7	2003	39.4447	NA	NA	0.426268	0.460503	41.3277	41.3748	39.5036	43.246
DADSQNPDAPEGK	2	13	2004	26.1369	NA	NA	0.184308	0.194694	26.7082	26.7737	24.9024	28.6451
DAEAWFNEK	2	9	2007	55.1437	NA	NA	0.711703	0.711579	55.1368	55.1665	53.2953	57.0377
DAEAWFTSR	2	9	2008	58.7341	NA	NA	0.776985	0.767977	58.2387	58.2645	56.3933	60.1357
DAEDAIYGR	2	9	2009	41.6662	NA	NA	0.466659	0.469436	41.819	41.8655	39.9942	43.7367
DAEDALHNLDR	2	11	2010	46.2171	NA	NA	0.549403	0.562404	46.9322	46.9722	45.1011	48.8434
DAEDAMDAMDGAVLDGR	2	17	2011	71.5738	NA	NA	1.01043	1.00412	71.2265	71.2359	69.3646	73.1073
DAEDAVYGR	2	9	2012	36.281	NA	NA	0.368746	0.383695	37.1032	37.1557	35.2844	39.0269
DAEDVDLNHYR	2	11	2013	42.4089	NA	NA	0.480161	0.486025	42.7314	42.7767	40.9055	44.6479
DAEDWFFSK	2	9	2014	72.0681	NA	NA	1.01942	1.00976	71.5368	71.5457	69.6744	73.4171
DAESIHQYLLQR	2	12	2016	52.2477	NA	NA	0.659049	0.659155	52.2535	52.2868	50.4157	54.158
DAFADAVQR	2	9	2017	44.1755	NA	NA	0.512282	0.500582	43.532	43.5763	41.7051	45.4475
DAFDTLFDHAPDK	2	13	2018	65.8696	NA	NA	0.90672	0.927014	66.9858	67.0005	65.1292	68.8718
DAFVAIVQSVK	2	11	2021	67.7533	NA	NA	0.940969	0.976834	69.7259	69.7372	67.8658	71.6085
DAGEGGLSLAIEGPSK	2	16	2022	60.5883	NA	NA	0.810697	0.794953	59.7224	59.7463	57.8751	61.6175
DAGEGLLAVQITDPEGK	2	17	2023	70.6284	NA	NA	0.993244	0.979982	69.899	69.91	68.0387	71.7814
DAGEGLLAVQITDPEGKPK	2	19	2024	61.4616	NA	NA	0.826575	0.837265	62.0496	62.0705	60.1993	63.9418
DAGEGLLAVQITDPEGKPK	3	19	2025	61.4929	NA	NA	0.827143	0.837265	62.0496	62.0705	60.1993	63.9418
DAGEGLLAVQITDQEGKPK	2	19	2026	58.6499	NA	NA	0.775452	0.785989	59.2294	59.2539	57.3827	61.1251
DAGLAVR	2	7	2031	31.4046	NA	NA	0.280083	0.293587	32.1473	32.206	30.3347	34.0773
DAGMQLQGYR	2	10	2032	45.3133	NA	NA	0.532969	0.522748	44.7512	44.794	42.9228	46.6651
DAGTIAGLNVLR	2	12	2034	64.8819	NA	NA	0.888761	0.871238	63.9181	63.9367	62.0654	65.8079
DAGTIAGLNVMR	2	12	2035	60.3554	NA	NA	0.806462	0.798991	59.9445	59.9681	58.0969	61.8393
DAGVIAGLNVLR	2	12	2036	69.9412	NA	NA	0.980749	0.987134	70.2924	70.3029	68.4316	72.1742
DAGYGGISLAVEGPSK	2	16	2038	61.6101	NA	NA	0.829274	0.814605	60.8033	60.8258	58.9546	62.697
DAGYGGLSLSIEGPSK	2	16	2039	65.6663	NA	NA	0.903024	0.881328	64.473	64.4909	62.6197	66.3622
DAHLLVESK	2	9	2040	34.1055	NA	NA	0.32919	0.346397	35.0518	35.1068	33.2356	36.9781
DAHNALLDIQSSGR	2	14	2041	48.6331	NA	NA	0.593329	0.60819	49.4504	49.4873	47.6161	51.3585
DAHNALLDIQSSGR	3	14	2042	48.6331	NA	NA	0.593329	0.60819	49.4504	49.4873	47.6161	51.3585
DAIAILDGIPSR	2	12	2044	71.6651	NA	NA	1.01209	1.00245	71.1345	71.144	69.2726	73.0153
DAIAQAVR	2	8	2045	34.7744	NA	NA	0.341353	0.346991	35.0845	35.1395	33.2682	37.0108
DAIHFYNK	2	8	2046	39.0563	NA	NA	0.419206	0.418121	38.9967	39.0467	37.1755	40.9179
DAIHFYNK	3	8	2047	39.0249	NA	NA	0.418634	0.418121	38.9967	39.0467	37.1755	40.9179
DALDGPAAEAEPEHSFDGLR	2	20	2052	59.1036	NA	NA	0.783702	0.761711	57.8941	57.9203	56.0491	59.7915
DALQGFK	2	7	2057	41.2204	NA	NA	0.458552	0.475243	42.1384	42.1845	40.3133	44.0557
DALYFLDDTAK	2	11	2061	70.1052	NA	NA	0.983731	0.988772	70.3825	70.3929	68.5216	72.2642
DANLYISGLPR	2	11	2064	62.422	NA	NA	0.844036	0.848279	62.6553	62.6755	60.8043	64.5468
DAPQDFHPDR	2	10	2065	32.8704	NA	NA	0.306735	0.307363	32.905	32.9627	31.0914	34.834
DAQAEEEIK	2	9	2066	29.8622	NA	NA	0.25204	0.255463	30.0505	30.1118	28.2405	31.9831
DAQDVQASQAEADQQQTR	2	18	2067	35.4357	NA	NA	0.353377	0.337554	34.5655	34.6211	32.7498	36.4924
DAQEMADSLGVR	2	12	2068	54.7989	NA	NA	0.705434	0.682619	53.544	53.5757	51.7045	55.4469
DAQHYGGWEHR	3	11	2070	30.3792	NA	NA	0.261441	0.279969	31.3983	31.458	29.5867	33.3293
DAQIAMMQQR	2	10	2071	44.4444	NA	NA	0.51717	0.497803	43.3792	43.4237	41.5525	45.2949
DAQPSFSAEDIAK	2	13	2072	52.4714	NA	NA	0.663117	0.657963	52.188	52.2214	50.3502	54.0925
DAQQVEPEGQEK	2	12	2073	28.3531	NA	NA	0.224602	0.226222	28.4422	28.5056	26.6342	30.3769
DASLMVTNDGATILK	2	15	2077	64.7341	NA	NA	0.886074	0.887625	64.8194	64.8368	62.9656	66.7081
DATNVGDEGGFAPNILENK	2	19	2079	66.6355	NA	NA	0.920645	0.922886	66.7587	66.7738	64.9025	68.645
DATNVGDEGGFAPNILENK	3	19	2080	66.6644	NA	NA	0.92117	0.922886	66.7587	66.7738	64.9025	68.645
DATQITQGPR	2	10	2081	34.3557	NA	NA	0.33374	0.319681	33.5825	33.6393	31.7681	35.5106
DAVDWVHYK	2	9	2082	50.2175	NA	NA	0.622136	0.619021	50.0462	50.0823	48.2111	51.9535
DAVEQQGEVK	2	10	2083	27.5494	NA	NA	0.209989	0.214211	27.7816	27.8458	25.9744	29.7172
DAVFIPAGWDNDK	2	13	2084	68.8149	NA	NA	0.960271	0.93592	67.4756	67.4897	65.6184	69.361
DAVFIPAGWDNEK	2	13	2085	68.5579	NA	NA	0.955598	0.919568	66.5762	66.5915	64.7202	68.4628
DAVLLVFANK	2	10	2088	69.2507	NA	NA	0.968194	0.973044	69.5174	69.5289	67.6576	71.4003
DAVTYTEHAK	2	10	2089	27.8102	NA	NA	0.214732	0.203246	27.1785	27.2435	25.3721	29.1148
DAVTYTEHAK	3	10	2090	27.8102	NA	NA	0.214732	0.203246	27.1785	27.2435	25.3721	29.1148
DAWGPGAAK	2	9	2091	35.1273	NA	NA	0.347769	0.378844	36.8364	36.8892	35.0179	38.7604
DAWQMTEEEYTPPAGAK	2	17	2092	61.8066	NA	NA	0.832846	0.824652	61.3559	61.3777	59.5064	63.2489
DAYSGGAVNLYHVR	2	14	2094	49.2944	NA	NA	0.605352	0.600792	49.0435	49.0809	47.2097	50.9521
DAYSSFGSR	2	9	2095	39.779	NA	NA	0.432346	0.425503	39.4026	39.4522	37.581	41.3234
DAYTHPQFVTDVMK	2	14	2096	57.0036	NA	NA	0.74552	0.727836	56.031	56.0595	54.1883	57.9307
DCAVIVTQK	2	9	2097	36.1294	Carbamidomethyl@C	2	0.36599	0.3603	35.8165	35.8705	33.9993	37.7418
DCDLQEDACYNCGR	2	14	2098	44.2343	Carbamidomethyl@C;Carbamidomethyl@C;Carbamidomethyl@C	2;9;12	0.51335	0.493329	43.1331	43.1779	41.3067	45.0491
DCEECIQLEPTFIK	2	14	2100	69.8127	Carbamidomethyl@C;Carbamidomethyl@C	2;5	0.978413	0.964021	69.0212	69.0333	67.162	70.9046
DCELENQEAHEQDGNDELK	2	19	2101	41.4248	Carbamidomethyl@C	2	0.462268	0.434096	39.8753	39.9242	38.053	41.7954
DCEVVMMIGLPGAGK	2	15	2104	68.9982	Carbamidomethyl@C;Oxidation@M	2;7	0.963604	0.947543	68.1149	68.1282	66.2569	69.9995
DCEVVMMIGLPGAGK	2	15	2105	70.3691	Carbamidomethyl@C;Oxidation@M	2;6	0.988528	0.980844	69.9464	69.9574	68.0861	71.8287
DCFGCLR	2	7	2106	44.2343	Carbamidomethyl@C;Carbamidomethyl@C	2;5	0.51335	0.489926	42.9459	42.991	41.1198	44.8622
DCGATWVVLGHSER	2	14	2107	53.7834	Carbamidomethyl@C	2	0.686972	0.692918	54.1105	54.1414	52.2703	56.0126
DCGATWVVLGHSER	3	14	2108	53.7834	Carbamidomethyl@C	2	0.686972	0.692918	54.1105	54.1414	52.2703	56.0126
DCISWVGDEGEFK	2	13	2112	66.236	Carbamidomethyl@C	2	0.913382	0.91851	66.518	66.5334	64.6621	68.4046
DCLINAAK	2	8	2113	37.7512	Carbamidomethyl@C	2	0.395477	0.394784	37.7131	37.7648	35.8935	39.636
DCLNVLNK	2	8	2114	45.1103	Carbamidomethyl@C	2	0.529279	0.523032	44.7668	44.8095	42.9383	46.6807
DCLSIPYR	2	8	2115	52.8874	Carbamidomethyl@C	2	0.670679	0.657945	52.187	52.2204	50.3492	54.0915
DCLTESNLIK	2	10	2116	51.0961	Carbamidomethyl@C	2	0.63811	0.649096	51.7003	51.7343	49.8631	53.6055
DCQIAHGAAQFLR	2	13	2117	53.1404	Carbamidomethyl@C	2	0.67528	0.668898	52.7894	52.822	50.9509	54.6932
DCTVEMPILK	2	10	2118	61.2861	Carbamidomethyl@C	2	0.823384	0.804798	60.2639	60.2871	58.4159	62.1583
DCVGDVTENQICNK	2	14	2119	45.2091	Carbamidomethyl@C;Carbamidomethyl@C	2;12	0.531075	0.549696	46.2333	46.2742	44.403	48.1454
DCVGPEVEK	2	9	2120	32.7779	Carbamidomethyl@C	2	0.305053	0.300968	32.5532	32.6114	30.7401	34.4827
DDAGWSPLHIAASAGR	3	16	2121	61.8654	NA	NA	0.833916	0.817828	60.9805	61.0028	59.1316	62.8741
DDAMLLK	2	7	2122	44.7424	NA	NA	0.522589	0.542308	45.8269	45.8684	43.9972	47.7395
DDANNDPQWSEEQLIAAK	2	18	2123	63.0439	NA	NA	0.855344	0.837482	62.0615	62.0824	60.2112	63.9537
DDDDVVIGK	2	9	2126	39.5986	NA	NA	0.429066	0.428249	39.5537	39.603	37.7318	41.4742
DDDIEEGDLPEHK	2	13	2128	41.1148	NA	NA	0.456632	0.426944	39.4819	39.5313	37.6601	41.4026
DDDRTPGLHGDCDDDK	3	16	2129	29.3571	Carbamidomethyl@C	12	0.242856	0.233372	28.8354	28.8983	27.027	30.7697
DDEAEWQELQQSIQR	2	15	2131	71.3762	NA	NA	1.00684	0.964515	69.0483	69.0604	67.1891	70.9318
DDETMYVESK	2	10	2135	40.7913	NA	NA	0.450751	0.442562	40.3409	40.3893	38.5181	42.2605
DDEVAQLK	2	8	2136	35.9054	NA	NA	0.361916	0.361974	35.9086	35.9625	34.0913	37.8338
DDEVQVVR	2	8	2137	36.0419	NA	NA	0.364399	0.355816	35.5699	35.6242	33.753	37.4955
DDFDFGTMGHVIR	2	13	2138	64.6436	NA	NA	0.884429	0.876691	64.218	64.2362	62.365	66.1075
DDFTEFGK	2	8	2139	50.5681	NA	NA	0.628511	0.615453	49.8499	49.8863	48.0151	51.7575
DDGLFSGDPNWFPK	2	14	2141	73.2385	NA	NA	1.0407	1.04134	73.2738	73.2805	71.4092	75.1519
DDGSWEVIEGYR	2	12	2142	67.1684	NA	NA	0.930334	0.922789	66.7534	66.7684	64.8971	68.6397
DDGVFVQEVTQNSPAAR	2	17	2143	62.1026	NA	NA	0.83823	0.821437	61.179	61.2011	59.3298	63.0723
DDILNGSHPVSFDK	2	14	2145	51.8459	NA	NA	0.651743	0.6436	51.398	51.4324	49.5612	53.3036
DDITGEPLIR	2	10	2146	54.1644	NA	NA	0.693898	0.690822	53.9952	54.0263	52.1551	55.8975
DDLDEEEDTHL	2	11	2149	50.4881	NA	NA	0.627056	0.622235	50.2229	50.2588	48.3876	52.13
DDMELSDLHGK	2	11	2155	42.4642	NA	NA	0.481167	0.496218	43.292	43.3366	41.4654	45.2078
DDNFGEGNDGGILDDK	2	16	2156	57.1771	NA	NA	0.748675	0.727164	55.994	56.0226	54.1514	57.8938
DDNMFQIGK	2	9	2157	55.3633	NA	NA	0.715696	0.725586	55.9072	55.9359	54.0647	57.8071
DDPHACYSTVFDK	2	13	2158	47.3168	Carbamidomethyl@C	6	0.569396	0.571593	47.4376	47.477	45.6058	49.3482
DDPHACYSTVFDK	3	13	2159	47.2925	Carbamidomethyl@C	6	0.568954	0.571593	47.4376	47.477	45.6058	49.3482
DDPPPPEDDENK	2	12	2161	27.936	NA	NA	0.217018	0.227381	28.506	28.5693	26.6979	30.4406
DDSFFGETSHNYHK	3	14	2167	41.6384	NA	NA	0.466152	0.469822	41.8402	41.8867	40.0155	43.7579
DDSIEGIYDTLK	2	12	2168	72.3664	NA	NA	1.02484	0.990762	70.4919	70.5022	68.6309	72.3736
DDSPDLPK	2	8	2170	35.6844	NA	NA	0.357898	0.367011	36.1856	36.2392	34.368	38.1105
DDTIYEDEDVK	2	11	2172	44.8693	NA	NA	0.524896	0.521646	44.6905	44.7334	42.8622	46.6046
DDVAPESGDTTVK	2	13	2173	34.4697	NA	NA	0.335812	0.321744	33.6959	33.7527	31.8814	35.6239
DDVSISVEEGK	2	11	2178	43.7261	NA	NA	0.504112	0.485218	42.687	42.7324	40.8612	44.6036
DDVTALHCK	2	9	2181	28.989	Carbamidomethyl@C	8	0.236164	0.244968	29.4732	29.5353	27.664	31.4066
DDYTIPDEYR	2	10	2182	54.1129	NA	NA	0.692962	0.694894	54.2192	54.25	52.3788	56.1212
DEAAYGELR	2	9	2183	40.8206	NA	NA	0.451283	0.465564	41.606	41.6528	39.7816	43.524
DEAGHFLWPGFGENAR	3	16	2184	69.0293	NA	NA	0.964169	0.951015	68.3058	68.3189	66.4476	70.1902
DEAQNEGPATESEAPLK	2	17	2186	42.1804	NA	NA	0.476007	0.468473	41.766	41.8126	39.9414	43.6838
DEDPYVR	2	7	2188	32.7779	NA	NA	0.305053	0.302216	32.6219	32.68	30.8087	34.5512
DEDVLQK	2	7	2190	31.3189	NA	NA	0.278526	0.291252	32.0189	32.0777	30.2064	33.949
DEEFPEQK	2	8	2191	34.7744	NA	NA	0.341353	0.332943	34.3118	34.3678	32.4965	36.2391
DEEVHAGLGELLR	3	13	2192	58.505	NA	NA	0.772817	0.776418	58.703	58.7281	56.8569	60.5994
DEFEGLFK	2	8	2193	66.1083	NA	NA	0.911059	0.911521	66.1337	66.1495	64.2782	68.0207
DEILPTTPISEQK	2	13	2199	56.8254	NA	NA	0.74228	0.726359	55.9498	55.9784	54.1072	57.8496
DEISVDSLDFNK	2	12	2200	64.6128	NA	NA	0.883869	0.86096	63.3528	63.3721	61.5009	65.2434
DELADEIANSSGK	2	13	2201	51.0131	NA	NA	0.636602	0.640957	51.2526	51.2872	49.416	53.1584
DELDELK	2	7	2202	44.6305	NA	NA	0.520555	0.501889	43.6039	43.6482	41.777	45.5194
DELHIVEAEAMNYEGSPIK	2	19	2204	72.9148	NA	NA	1.03481	1.02449	72.3471	72.355	70.4837	74.2264
DELHIVEAEAMNYEGSPIK	3	19	2205	72.9148	NA	NA	1.03481	1.02449	72.3471	72.355	70.4837	74.2264
DELHIVEAEAMNYEGSPIK	2	19	2206	69.2507	Oxidation@M	11	0.968194	0.977787	69.7783	69.7895	67.9181	71.6608
DELHIVEAEAMNYEGSPIK	3	19	2207	69.2818	Oxidation@M	11	0.96876	0.977787	69.7783	69.7895	67.9181	71.6608
DELILEGNDIELVSNSAALIQQATTVK	3	27	2209	73.3454	NA	NA	1.04264	1.05598	74.0791	74.0848	72.2135	75.9562
DELMPLESAYR	2	11	2211	63.5091	NA	NA	0.863802	0.861758	63.3967	63.4159	61.5447	65.2872
DELNADHPFIYIIR	2	14	2212	70.1714	NA	NA	0.984934	0.986175	70.2396	70.2502	68.3789	72.1216
DELNADHPFIYIIR	3	14	2213	70.139	NA	NA	0.984346	0.986175	70.2396	70.2502	68.3789	72.1216
DENSVELTMAEGPYK	2	15	2218	60.7594	NA	NA	0.813807	0.80447	60.2458	60.2691	58.3978	62.1403
DEPCLLK	2	7	2219	42.804	Carbamidomethyl@C	4	0.487345	0.478975	42.3436	42.3895	40.5182	44.2607
DEPDTNLVALMK	2	12	2220	67.8123	NA	NA	0.942041	0.944423	67.9433	67.9568	66.0855	69.8281
DEPEDDGYFVPPK	2	13	2222	55.62	NA	NA	0.720364	0.718273	55.505	55.5342	53.663	57.4054
DEPGAWEETFK	2	11	2223	58.8206	NA	NA	0.778556	0.760545	57.83	57.8562	55.985	59.7274
DEPSVAAMVYPFTGDHK	2	17	2224	69.7116	NA	NA	0.976575	0.965636	69.11	69.122	67.2507	70.9933
DEPVRDENGYCVR	2	13	2225	36.0999	Carbamidomethyl@C	11	0.365453	0.357852	35.6818	35.7361	33.8648	37.6073
DEQLESLFQR	2	10	2226	65.8133	NA	NA	0.905697	0.891602	65.0381	65.0553	63.184	66.9265
DETEFYLGK	2	9	2227	54.6583	NA	NA	0.702878	0.697343	54.3538	54.3845	52.5133	56.2557
DETNYGIPQR	2	10	2230	43.1176	NA	NA	0.493047	0.492286	43.0757	43.1206	41.2494	44.9918
DETVSDCSPHIANIGR	2	16	2231	46.6019	Carbamidomethyl@C	7	0.556398	0.557377	46.6558	46.6961	44.8249	48.5673
DEVASLLFDPK	2	11	2232	71.903	NA	NA	1.01642	1.00326	71.1791	71.1885	69.3171	73.0598
DEWLRPEDLPIK	2	12	2233	66.357	NA	NA	0.915582	0.91653	66.4092	66.4246	64.5533	68.2959
DEWLRPEDLPIK	3	12	2234	66.2963	NA	NA	0.914479	0.91653	66.4092	66.4246	64.5533	68.2959
DEYLINSQTTEHIVK	2	15	2237	52.825	NA	NA	0.669546	0.66648	52.6564	52.6892	50.818	54.5604
DEYMVNLVR	2	9	2238	59.6043	NA	NA	0.792805	0.774656	58.6061	58.6314	56.7602	60.5026
DFAAEVVHPGDLK	2	13	2239	55.1437	NA	NA	0.711703	0.716111	55.3861	55.4155	53.5443	57.2867
DFAIDIIK	2	8	2240	68.9982	NA	NA	0.963604	0.987125	70.2919	70.3024	68.4311	72.1738
DFDFESANAQFNK	2	13	2242	62.834	NA	NA	0.851528	0.842039	62.3122	62.3328	60.4615	64.204
DFDTALK	2	7	2244	44.0481	NA	NA	0.509966	0.504469	43.7458	43.7898	41.9186	45.661
DFEEYPEHR	2	9	2245	37.2747	NA	NA	0.386813	0.411488	38.6318	38.6823	36.8111	40.5536
DFESHITSYK	2	10	2247	43.8623	NA	NA	0.506586	0.516752	44.4213	44.4645	42.5934	46.3357
DFFDAEIK	2	8	2248	63.0998	NA	NA	0.856359	0.857455	63.16	63.1796	61.3083	65.0508
DFINFISDK	2	9	2255	72.0022	NA	NA	1.01822	1.02538	72.396	72.4039	70.5325	74.2752
DFKPGDLIFAK	2	11	2256	65.1215	NA	NA	0.893118	0.879791	64.3885	64.4065	62.5352	66.2778
DFLAGGIAAAISK	2	13	2257	73.053	NA	NA	1.03733	1.00698	71.3838	71.393	69.5216	73.2643
DFLAGGVAAAISK	2	13	2258	67.5364	NA	NA	0.937026	0.924043	66.8224	66.8373	64.966	68.7086
DFLIPIGK	2	8	2260	68.9441	NA	NA	0.96262	0.977916	69.7854	69.7966	67.9252	71.6679
DFLITQMTGK	2	10	2261	64.8543	NA	NA	0.888259	0.883771	64.6074	64.6252	62.7539	66.4964
DFLLKPELLR	2	10	2262	67.2617	NA	NA	0.93203	0.934633	67.4048	67.419	65.5477	69.2903
DFLLKPELLR	3	10	2263	67.2617	NA	NA	0.93203	0.934633	67.4048	67.419	65.5477	69.2903
DFLLQQTMLR	2	10	2265	71.7675	NA	NA	1.01396	1.01047	71.5757	71.5846	69.7133	73.456
DFLLQQTMLR	2	10	2266	63.357	Oxidation@M	8	0.861036	0.865149	63.5832	63.6022	61.731	65.4735
DFLLTAR	2	7	2267	55.5318	NA	NA	0.718759	0.73732	56.5526	56.5805	54.7093	58.4517
DFLVQIK	2	7	2270	59.723	NA	NA	0.794963	0.824367	61.3402	61.362	59.4908	63.2333
DFLYSYFK	2	8	2271	72.7967	NA	NA	1.03267	1.00238	71.131	71.1405	69.2691	73.0118
DFMIQGGDFTR	2	11	2272	63.7738	NA	NA	0.868615	0.875857	64.1721	64.1904	62.3191	66.0617
DFNVPLSISR	2	10	2277	65.5711	NA	NA	0.901292	0.908324	65.9578	65.9739	64.1026	67.8451
DFPYEEDSRPR	2	11	2280	42.8618	NA	NA	0.488395	0.46675	41.6713	41.7179	39.8467	43.5891
DFQAISDVIGNK	2	12	2281	66.8894	NA	NA	0.925262	0.90594	65.8267	65.8429	63.9716	67.7142
DFSHPQMPK	2	9	2287	39.8054	NA	NA	0.432825	0.427173	39.4945	39.5439	37.6727	41.4152
DFSLEQLR	2	8	2288	62.0152	NA	NA	0.836639	0.816335	60.8984	60.9209	59.0496	62.7921
DFTATDLSEFAAK	2	13	2291	69.3143	NA	NA	0.969351	0.966547	69.1601	69.1721	67.3008	71.0434
DFTPAELR	2	8	2293	50.8496	NA	NA	0.633629	0.613295	49.7312	49.7677	47.8965	51.6389
DFTPVCTTELGR	2	12	2294	57.0885	Carbamidomethyl@C	6	0.747064	0.751026	57.3065	57.3334	55.4622	59.2046
DFTSEPR	2	7	2296	33.1227	NA	NA	0.311322	0.310817	33.095	33.1525	31.2812	35.0237
DFTVSAMHGDMDQK	2	14	2297	48.9017	NA	NA	0.598212	0.585247	48.1886	48.2271	46.3559	50.0982
DFTVSAMHGDMDQK	3	14	2298	48.9017	NA	NA	0.598212	0.585247	48.1886	48.2271	46.3559	50.0982
DFTVSAMHGDMDQK	2	14	2299	42.4367	Oxidation@M	11	0.480668	0.477735	42.2755	42.3214	40.4502	44.1926
DFTVSAMHGDMDQK	2	14	2300	39.9935	Oxidation@M	7	0.436245	0.442038	40.3121	40.3605	38.4893	42.2317
DFVAEPMGEK	2	10	2301	47.8126	NA	NA	0.578411	0.589871	48.4429	48.481	46.6099	50.3522
DFVQVMR	2	7	2305	51.1209	NA	NA	0.638562	0.649783	51.738	51.772	49.9008	53.6432
DFVTEALQSR	2	10	2308	65.0278	NA	NA	0.891415	0.805821	60.3202	60.3433	58.4721	62.2145
DFYFSVK	2	7	2309	60.9316	NA	NA	0.816939	0.816357	60.8996	60.9221	59.0508	62.7933
DGAPVATNAFHSPR	2	14	2314	41.089	NA	NA	0.456163	0.463377	41.4858	41.5327	39.6615	43.4039
DGAWGAFR	2	8	2315	52.825	NA	NA	0.669546	0.670738	52.8906	52.9231	51.0519	54.7943
DGDFENPVPYTGAVK	2	15	2316	59.3607	NA	NA	0.788376	0.796604	59.8132	59.837	57.9658	61.7082
DGDILGK	2	7	2317	33.7291	NA	NA	0.322347	0.357589	35.6674	35.7217	33.8504	37.5929
DGDSVMVLPTIPEEEAK	2	17	2318	71.9366	NA	NA	1.01703	1.01059	71.5827	71.5916	69.7203	73.463
DGDSVMVLPTIPEEEAKK	2	18	2319	63.0111	NA	NA	0.854747	0.865649	63.6107	63.6297	61.7584	65.5009
DGEDQTQDTELVETRPAGDGTFQK	2	24	2321	50.9879	NA	NA	0.636145	0.636124	50.9868	51.0217	49.1505	52.8929
DGEDQTQDTELVETRPAGDGTFQK	3	24	2322	50.9879	NA	NA	0.636145	0.636124	50.9868	51.0217	49.1505	52.8929
DGEEAGAYDGPR	2	12	2323	36.0419	NA	NA	0.364399	0.334605	34.4033	34.4591	32.5879	36.3304
DGETLEELMK	2	10	2328	62.9215	NA	NA	0.853118	0.87104	63.9072	63.9258	62.0546	65.7971
DGFGGLAAAR	2	10	2329	48.007	NA	NA	0.581946	0.608032	49.4417	49.4786	47.6074	51.3498
DGFPSGTPALNAK	2	13	2331	51.1209	NA	NA	0.638562	0.63993	51.1962	51.2308	49.3596	53.102
DGFVCALLR	2	9	2332	69.4774	Carbamidomethyl@C	5	0.972316	0.942609	67.8435	67.8571	65.9858	69.7284
DGFVTVDELK	2	10	2333	60.1562	NA	NA	0.80284	0.790901	59.4996	59.5237	57.6525	61.395
DGGAWGTEQR	2	10	2334	33.9879	NA	NA	0.327052	0.342897	34.8594	34.9146	33.0434	36.7859
DGHFTLFAPTNEAFEK	3	16	2337	65.9339	NA	NA	0.907889	0.928579	67.0718	67.0864	65.2151	68.9577
DGIDDESYGQIFKPIISK	2	18	2338	71.9689	NA	NA	1.01762	1.00589	71.3238	71.3331	69.4617	73.2044
DGIDDESYGQIFKPIISK	3	18	2339	71.9366	NA	NA	1.01703	1.00589	71.3238	71.3331	69.4617	73.2044
DGIEPMWEDEK	2	11	2340	58.9864	NA	NA	0.781571	0.81676	60.9218	60.9442	59.0729	62.8154
DGIVLGADTR	2	10	2342	46.3298	NA	NA	0.55145	0.556988	46.6343	46.6747	44.8035	48.5459
DGLCVPR	2	7	2343	43.3822	Carbamidomethyl@C	4	0.497859	0.437877	40.0832	40.1319	38.2607	42.0031
DGLEMEK	2	7	2344	33.7576	NA	NA	0.322866	0.31789	33.4839	33.5409	31.6697	35.4122
DGLGGLPDIVR	2	11	2345	67.2617	NA	NA	0.93203	0.937126	67.5419	67.556	65.6847	69.4273
DGLGSDNIGSR	2	11	2346	37.5877	NA	NA	0.392504	0.398595	37.9227	37.9741	36.1029	39.8454
DGLILTSR	2	8	2347	47.9766	NA	NA	0.581392	0.585892	48.224	48.2624	46.3913	50.1336
DGLIPLEIR	2	9	2348	70.8828	NA	NA	0.997869	0.964771	69.0624	69.0745	67.2032	70.9458
DGLLENQTPEFFQDVCKPK	3	19	2350	69.412	Carbamidomethyl@C	16	0.971128	0.975783	69.6681	69.6794	67.8081	71.5507
DGLNDDDFEPYLSPQAR	2	17	2352	70.4987	NA	NA	0.990885	1.00277	71.1524	71.1618	69.2905	73.0332
DGMAFNALIHK	2	11	2353	56.051	NA	NA	0.728199	0.733531	56.3442	56.3723	54.5011	58.2435
DGMDNQGGYGSVGR	2	14	2354	39.4978	NA	NA	0.427233	0.420567	39.1312	39.1811	37.3099	41.0523
DGMVSFHDNPEK	2	12	2355	40.5474	NA	NA	0.446316	0.450186	40.7603	40.8081	38.9369	42.6793
DGNASGTTLLEALDCILPPTRPTDK	2	25	2356	73.2601	Carbamidomethyl@C	15	1.04109	1.04468	73.4575	73.464	71.5926	75.3354
DGNASGTTLLEALDCILPPTRPTDK	3	25	2357	73.2601	Carbamidomethyl@C	15	1.04109	1.04468	73.4575	73.464	71.5926	75.3354
DGNDLHMTYK	2	10	2358	36.3927	NA	NA	0.370777	0.37483	36.6157	36.6687	34.7975	38.54
DGNGYISAAELR	2	12	2359	53.4037	NA	NA	0.680067	0.69688	54.3284	54.3591	52.4879	56.2303
DGNPDNETYLHR	2	12	2360	35.2664	NA	NA	0.350298	0.352592	35.3925	35.4471	33.5759	37.3184
DGNVLLHEMQIQHPTASLIAK	4	21	2361	63.7738	NA	NA	0.868615	0.870315	63.8673	63.886	62.0147	65.7572
DGPLGETVLECYNCGCR	2	17	2362	66.0813	Carbamidomethyl@C;Carbamidomethyl@C;Carbamidomethyl@C	11;14;16	0.910569	0.899996	65.4998	65.5164	63.6451	67.3877
DGPVPAHEPSHR	3	12	2366	25.3799	NA	NA	0.170544	0.162211	24.9216	24.9894	23.118	26.8608
DGPVRPQNAEEEK	2	13	2367	27.3317	NA	NA	0.206032	0.199348	26.9641	27.0294	25.158	28.9007
DGPVRPQNAEEEK	3	13	2368	27.3317	NA	NA	0.206032	0.199348	26.9641	27.0294	25.158	28.9007
DGQAMLWDLNEGK	2	13	2369	67.8434	NA	NA	0.942608	0.975462	69.6504	69.6618	67.7904	71.5331
DGQAMLWDLNEGK	2	13	2370	60.8106	Oxidation@M	5	0.814739	0.800239	60.0131	60.0367	58.1654	61.9079
DGQILPVPNVVVR	2	13	2371	69.5423	NA	NA	0.973496	0.952637	68.3951	68.408	66.5367	70.2793
DGQVINETSQHHDDLE	2	16	2374	39.4153	NA	NA	0.425733	0.431852	39.7519	39.801	37.9297	41.6722
DGSCGVAYVVQEPGDYEVSVK	2	21	2376	65.8696	Carbamidomethyl@C	4	0.90672	0.912112	66.1661	66.1819	64.3106	68.0532
DGSIDLVINLPNNNTK	2	16	2379	70.7235	NA	NA	0.994974	0.965961	69.1278	69.1399	67.2685	71.0112
DGSLASNPYSGDLTK	2	15	2380	52.3888	NA	NA	0.661614	0.643902	51.4146	51.449	49.5778	53.3202
DGSLEVTGQLGEVMK	2	15	2381	66.357	NA	NA	0.915582	0.91178	66.1479	66.1637	64.2924	68.035
DGTGVVEFVR	2	10	2384	54.6583	NA	NA	0.702878	0.732567	56.2912	56.3194	54.4482	58.1906
DGTILCTLMNK	2	11	2386	68.036	Carbamidomethyl@C	6	0.94611	0.963293	68.9811	68.9933	67.122	70.8646
DGTYAVTYIPDK	2	12	2393	55.0108	NA	NA	0.709287	0.695368	54.2452	54.2761	52.4049	56.1472
DGVADVSIEDSVISLSGDHCIIGR	3	24	2398	73.1147	Carbamidomethyl@C	20	1.03845	1.04315	73.3731	73.3797	71.5083	75.2511
DGVCGPPPSK	2	10	2399	28.0242	Carbamidomethyl@C	4	0.218621	0.247923	29.6358	29.6976	27.8263	31.569
DGVGMVEYLR	2	10	2400	61.6966	NA	NA	0.830847	0.810826	60.5954	60.6182	58.747	62.4894
DGVPEGAQLQGPVHR	2	15	2402	43.1715	NA	NA	0.494027	0.504663	43.7565	43.8005	41.9293	45.6717
DGVVEITGK	2	9	2404	40.5763	NA	NA	0.446843	0.450763	40.792	40.8398	38.9686	42.711
DGVVLFK	2	7	2406	53.2195	NA	NA	0.676719	0.679566	53.3761	53.408	51.5368	55.2792
DGVWNLQNEVTK	2	12	2407	61.3738	NA	NA	0.824978	0.823551	61.2953	61.3172	59.446	63.1884
DGWGGYGSDK	2	10	2409	41.7191	NA	NA	0.46762	0.461052	41.3579	41.405	39.5337	43.2762
DGWPAMCIHGDK	2	12	2410	50.8806	Carbamidomethyl@C	7	0.634192	0.62034	50.1187	50.1547	48.2835	52.0259
DGWPAMGIHGDK	2	12	2411	49.0706	NA	NA	0.601283	0.603902	49.2146	49.2518	47.3806	51.1229
DGYAQILR	2	8	2413	49.685	NA	NA	0.612454	0.636336	50.9985	51.0334	49.1622	52.9046
DGYDYDGYR	2	9	2414	44.29	NA	NA	0.514364	0.521534	44.6844	44.7272	42.8561	46.5984
DGYNYTLSK	2	9	2415	43.0277	NA	NA	0.491413	0.496098	43.2854	43.33	41.4588	45.2012
DHAATTAGAASLAGGHHR	3	18	2416	26.7141	NA	NA	0.194801	0.223395	28.2867	28.3503	26.4789	30.2216
DHAATTAGAASLAGGHHR	4	18	2417	26.7141	NA	NA	0.194801	0.223395	28.2867	28.3503	26.4789	30.2216
DHASIQMNVAEVDK	3	14	2419	45.9366	NA	NA	0.544301	0.549759	46.2368	46.2777	44.4065	48.1489
DHASIQMNVAEVDK	2	14	2420	38.0437	Oxidation@M	7	0.400795	0.411134	38.6124	38.6629	36.7917	40.5342
DHAVVVGVYRPPPK	3	14	2421	37.7512	NA	NA	0.395477	0.406103	38.3357	38.3866	36.5153	40.2578
DHENIVIAK	2	9	2422	32.2626	NA	NA	0.295683	0.280178	31.4098	31.4694	29.5981	33.3407
DHFEEAMR	2	8	2423	32.6321	NA	NA	0.302401	0.308486	32.9667	33.0244	31.1531	34.8957
DHGGALGPEEFK	2	12	2424	40.71	NA	NA	0.449273	0.443454	40.39	40.4383	38.567	42.3095
DHIMEIFSTYGK	2	12	2425	63.8898	NA	NA	0.870724	0.880744	64.4409	64.4588	62.5876	66.3301
DHINDIIK	2	8	2426	38.0437	NA	NA	0.400795	0.404297	38.2363	38.2874	36.4161	40.1586
DHINLPGFSGQNPLR	3	15	2428	62.2486	NA	NA	0.840884	0.843664	62.4015	62.422	60.5508	64.2933
DHLVTAYNHLFETK	2	14	2430	53.1127	NA	NA	0.674777	0.683933	53.6163	53.6479	51.7768	55.5191
DHLVTAYNHLFETK	3	14	2431	53.1127	NA	NA	0.674777	0.683933	53.6163	53.6479	51.7768	55.5191
DHLYGTLDPNTR	2	12	2432	43.622	NA	NA	0.502217	0.500277	43.5153	43.5596	41.6884	45.4308
DHPFGFVAVPTK	2	12	2433	56.1316	NA	NA	0.729665	0.717861	55.4823	55.5116	53.6404	57.3828
DHPLPEVAHVK	2	11	2434	34.0759	NA	NA	0.328653	0.340336	34.7185	34.7739	32.9026	36.6452
DHPQQQPGMLSR	2	12	2435	32.0114	NA	NA	0.291117	0.295614	32.2588	32.3173	30.446	34.1886
DHQYQFLEDAVR	2	12	2436	57.2879	NA	NA	0.750689	0.737378	56.5558	56.5837	54.7125	58.4549
DHQYQFLEDAVR	3	12	2437	57.2879	NA	NA	0.750689	0.737378	56.5558	56.5837	54.7125	58.4549
DHRPPCAQEAPR	3	12	2438	24.9228	Carbamidomethyl@C	6	0.162232	0.156189	24.5904	24.6586	22.7872	26.53
DHSGTLGPEEFK	2	12	2439	40.8756	NA	NA	0.452283	0.44538	40.4959	40.544	38.6728	42.4153
DHTLVQTIAR	2	10	2440	40.352	NA	NA	0.442764	0.462776	41.4527	41.4996	39.6284	43.3708
DHTTLLSEVMTPR	3	13	2441	61.1989	NA	NA	0.821798	0.818028	60.9915	61.0138	59.1426	62.8851
DHVFEDSYR	2	9	2442	37.3261	NA	NA	0.387746	0.390145	37.458	37.51	35.6387	39.3812
DICNDVLSLLEK	2	12	2446	73.3238	Carbamidomethyl@C	3	1.04225	1.04743	73.6086	73.615	71.7436	75.4864
DIDDDLEGEVTEECGK	2	16	2448	61.7786	Carbamidomethyl@C	14	0.832338	0.786452	59.2548	59.2793	57.4081	61.1505
DIDENAYAK	2	9	2449	35.6844	NA	NA	0.357898	0.338966	34.6431	34.6987	32.8274	36.57
DIDEVSSLLR	2	10	2450	67.689	NA	NA	0.939799	0.943701	67.9035	67.9171	66.0458	69.7884
DIDILNSAGK	2	10	2453	54.5761	NA	NA	0.701383	0.731704	56.2437	56.272	54.4008	58.1432
DIDISSPEFK	2	10	2454	57.5557	NA	NA	0.755558	0.758818	57.735	57.7614	55.8902	59.6326
DIDNLVQR	2	8	2455	47.2629	NA	NA	0.568416	0.574528	47.599	47.6382	45.767	49.5094
DIDPQNDLTFLR	2	12	2456	72.1342	NA	NA	1.02062	1.01579	71.8684	71.877	70.0056	73.7484
DIEAMDPSILK	2	11	2457	64.8232	NA	NA	0.887695	0.86823	63.7527	63.7715	61.9002	65.6427
DIEDVFYK	2	8	2458	62.1334	NA	NA	0.838789	0.857591	63.1675	63.1871	61.3158	65.0583
DIELSDDPYDCIR	2	13	2461	65.4297	Carbamidomethyl@C	11	0.898721	0.897359	65.3547	65.3715	63.5002	67.2428
DIEQYYSTQIDEMPMNVADLI	2	21	2463	73.6269	NA	NA	1.04776	1.05098	73.8038	73.8099	71.9385	75.6813
DIEREDIEFICK	2	12	2465	57.0601	Carbamidomethyl@C	11	0.746547	0.742486	56.8367	56.8643	54.9931	58.7355
DIETFYNTSIEEMPLNVADLI	2	21	2466	73.7925	NA	NA	1.05077	1.05379	73.9587	73.9646	72.0932	75.836
DIETFYNTSIEEMPLNVADLI	2	21	2467	73.7925	Oxidation@M	13	1.05077	1.0522	73.8711	73.8771	72.0058	75.7485
DIFDQLAK	2	8	2469	64.1721	NA	NA	0.875856	0.886516	64.7584	64.7759	62.9046	66.6472
DIFPYSENK	2	9	2470	53.1127	NA	NA	0.674777	0.680046	53.4025	53.4344	51.5632	55.3056
DIFQEIYDK	2	9	2471	69.3784	NA	NA	0.970517	0.973588	69.5474	69.5588	67.6875	71.4302
DIIALNPLYR	2	10	2474	71.6651	NA	NA	1.01209	1.00803	71.4414	71.4505	69.5791	73.3218
DIIEHLNTSGAPADTSDPLQQICK	3	24	2476	66.7915	Carbamidomethyl@C	23	0.923481	0.92164	66.6902	66.7053	64.834	68.5766
DIIFAIK	2	7	2477	63.6789	NA	NA	0.866889	0.888002	64.8401	64.8575	62.9863	66.7288
DIIHDPGR	3	8	2480	32.8413	NA	NA	0.306205	0.310185	33.0602	33.1177	31.2464	34.989
DIINEEEVQFLK	2	12	2483	72.9876	NA	NA	1.03614	1.01062	71.5843	71.5932	69.7219	73.4646
DIIPFIDK	2	8	2484	70.0737	NA	NA	0.983158	0.966542	69.1598	69.1718	67.3005	71.0431
DIISDTSGDFR	2	11	2485	58.4558	NA	NA	0.771923	0.763638	58.0001	58.0262	56.1549	59.8974
DIISDTSGDFRK	2	12	2486	49.7867	NA	NA	0.614303	0.607405	49.4073	49.4442	47.573	51.3154
DIISDTSGDFRK	3	12	2487	49.7867	NA	NA	0.614303	0.607405	49.4073	49.4442	47.573	51.3154
DIIVIGNDITYR	2	12	2488	69.0293	NA	NA	0.964169	0.955171	68.5344	68.5472	66.6759	70.4185
DILADVNHPFVVK	2	13	2490	64.6436	NA	NA	0.884429	0.885814	64.7198	64.7374	62.8661	66.6086
DILETHLR	2	8	2494	43.9329	NA	NA	0.50787	0.506039	43.8322	43.8761	42.0049	45.7473
DILIACR	2	7	2496	46.518	Carbamidomethyl@C	6	0.554873	0.553175	46.4246	46.4653	44.5941	48.3365
DILIQYDR	2	8	2497	54.384	NA	NA	0.697891	0.711477	55.1313	55.1609	53.2897	57.0321
DILLRPELEELR	2	12	2499	66.5121	NA	NA	0.918401	0.924393	66.8416	66.8565	64.9852	68.7278
DILLRPELEELR	3	12	2500	66.5121	NA	NA	0.918401	0.924393	66.8416	66.8565	64.9852	68.7278
DILNMEK	2	7	2501	47.6994	NA	NA	0.576353	0.557537	46.6646	46.7049	44.8337	48.5761
DILQDVHDK	2	9	2504	40.9851	NA	NA	0.454274	0.455402	41.0471	41.0946	39.2233	42.9658
DILQNVFK	2	8	2505	67.2617	NA	NA	0.93203	0.971872	69.453	69.4646	67.5933	71.3359
DINAVAASLR	2	10	2508	55.2807	NA	NA	0.714194	0.714642	55.3053	55.3348	53.4636	57.206
DINAYNCEEPTEK	2	13	2509	41.6384	Carbamidomethyl@C	7	0.466152	0.460173	41.3095	41.3566	39.4854	43.2278
DINLASFIEQVAVSMT	2	16	2510	74.1837	NA	NA	1.05789	1.0545	73.9975	74.0034	72.132	75.8748
DIPGLTDTTVPR	2	12	2513	59.4199	NA	NA	0.789453	0.78716	59.2938	59.3182	57.447	61.1895
DIPNENELQFQIK	2	13	2514	65.7197	NA	NA	0.903995	0.906546	65.86	65.8762	64.0049	67.7475
DIPVLVATDVAAR	2	13	2517	68.4352	NA	NA	0.953368	0.953291	68.431	68.4439	66.5726	70.3152
DIPVVHQLLTR	2	11	2518	63.0439	NA	NA	0.855344	0.824512	61.3482	61.37	59.4988	63.2412
DIQEDSGMEPR	2	11	2519	40.1267	NA	NA	0.438668	0.42502	39.3761	39.4257	37.5544	41.2969
DIQEESTFSSR	2	11	2520	42.3507	NA	NA	0.479103	0.480338	42.4186	42.4643	40.5931	44.3355
DIQMPDGIR	2	9	2521	54.033	NA	NA	0.691509	0.685798	53.7189	53.7503	51.8792	55.6215
DIRPGAAFEPTYIYR	2	15	2524	62.0152	NA	NA	0.836639	0.825207	61.3864	61.4082	59.5369	63.2794
DISCLNR	2	7	2525	35.2664	Carbamidomethyl@C	4	0.350298	0.370299	36.3665	36.4198	34.5486	38.2911
DISLSDYK	2	8	2527	49.0706	NA	NA	0.601283	0.597919	48.8856	48.9231	47.0519	50.7943
DISNCWAPK	2	9	2528	48.4156	Carbamidomethyl@C	5	0.589375	0.573025	47.5163	47.5556	45.6845	49.4268
DISQAYYTVYK	2	11	2529	58.2099	NA	NA	0.767453	0.781811	58.9996	59.0244	57.1532	60.8956
DISTNYYASQK	2	11	2534	42.1288	NA	NA	0.475069	0.476906	42.2298	42.2758	40.4046	44.147
DISTTLNADEAVAR	2	14	2535	55.7901	NA	NA	0.723457	0.704197	54.7308	54.761	52.8898	56.6322
DITGTLSNPEVFNYGVETHEAYK	3	23	2537	68.8776	NA	NA	0.961411	0.961817	68.8999	68.9122	67.0409	70.7835
DITSDTSGDFR	2	11	2538	46.2171	NA	NA	0.549403	0.534283	45.3856	45.4276	43.5564	47.2988
DIVENYFMR	2	9	2542	67.7218	NA	NA	0.940397	0.948918	68.1905	68.2037	66.3324	70.075
DIVHSGLAYTMER	2	13	2543	57.3459	NA	NA	0.751744	0.729608	56.1284	56.1569	54.2857	58.0281
DIVQFVPYR	2	9	2547	65.6909	NA	NA	0.903471	0.905253	65.7889	65.8051	63.9339	67.6764
DIVSLVPR	2	8	2548	60.2156	NA	NA	0.803919	0.797127	59.842	59.8658	57.9945	61.737
DIVVLGVEK	2	9	2549	56.4105	NA	NA	0.734737	0.758587	57.7223	57.7487	55.8775	59.6199
DIYYNNMEEVCGGEK	2	15	2551	55.3899	Carbamidomethyl@C	11	0.71618	0.718639	55.5251	55.5543	53.6831	57.4255
DKDDDEVFEK	2	10	2552	33.2692	NA	NA	0.313985	0.305252	32.7889	32.8468	30.9755	34.718
DKDDDGGEDDDANCNLICGDEYGPETR	3	27	2553	55.1184	Carbamidomethyl@C;Carbamidomethyl@C	14;18	0.711244	0.713728	55.255	55.2846	53.4134	57.1558
DKDPPIPVAK	2	10	2554	34.9114	NA	NA	0.343843	0.358952	35.7424	35.7965	33.9253	37.6678
DKLDETGNSLK	2	11	2555	31.3459	NA	NA	0.279015	0.287096	31.7903	31.8494	29.9781	33.7207
DKLESEMEDAYHEHQANLLR	4	20	2557	58.505	NA	NA	0.772817	0.772194	58.4707	58.4961	56.6249	60.3674
DKPEEQWWNAEDSEGK	2	16	2558	51.6531	NA	NA	0.648238	0.649167	51.7042	51.7382	49.867	53.6094
DKPHVNVGTIGHVDHGK	3	17	2559	30.1452	NA	NA	0.257185	0.245735	29.5154	29.5775	27.7061	31.4488
DLADELALVDVIEDK	2	15	2562	74.7203	NA	NA	1.06764	1.04723	73.5975	73.6039	71.7325	75.4753
DLAEDAPWK	2	9	2563	55.7656	NA	NA	0.723011	0.72197	55.7083	55.7373	53.8661	57.6085
DLAEDAPWKK	2	10	2564	46.0091	NA	NA	0.545619	0.549265	46.2096	46.2505	44.3793	48.1217
DLAEDLYDGQVLQK	2	14	2565	70.9163	NA	NA	0.998478	0.987406	70.3073	70.3178	68.4465	72.1892
DLAGCIHGLSNVK	2	13	2566	53.5353	Carbamidomethyl@C	5	0.682459	0.640041	51.2023	51.2369	49.3657	53.1081
DLAGSIIGK	2	9	2567	53.6206	NA	NA	0.684012	0.676347	53.1991	53.2312	51.36	55.1024
DLALAIR	2	7	2568	53.4849	NA	NA	0.681544	0.682901	53.5596	53.5912	51.7201	55.4624
DLAQALINR	2	9	2572	58.1837	NA	NA	0.766977	0.765507	58.1029	58.1288	56.2576	60.0001
DLASIAR	2	7	2573	41.5116	NA	NA	0.463847	0.469787	41.8383	41.8847	40.0135	43.7559
DLASVQALLR	2	10	2575	70.6911	NA	NA	0.994384	0.997705	70.8738	70.8836	69.0122	72.7549
DLAYCVSQLPLTER	2	14	2577	70.7832	Carbamidomethyl@C	5	0.996059	0.985803	70.2192	70.2298	68.3585	72.1011
DLCNTHLMR	2	9	2579	38.5431	Carbamidomethyl@C	3	0.409874	0.386058	37.2332	37.2855	35.4142	39.1567
DLCNTHLMR	3	9	2580	38.5431	Carbamidomethyl@C	3	0.409874	0.386058	37.2332	37.2855	35.4142	39.1567
DLCNTHLMR	2	9	2581	32.3775	Carbamidomethyl@C;Oxidation@M	3;8	0.297773	0.29598	32.2789	32.3374	30.4661	34.2087
DLDELSRYPEDK	2	12	2583	48.7166	NA	NA	0.594846	0.595491	48.752	48.7897	46.9186	50.6609
DLDEVLQTHSVFVNVSK	2	17	2584	70.8495	NA	NA	0.997265	0.979438	69.8691	69.8802	68.0088	71.7515
DLDIIDNYDYSHTVK	2	15	2586	62.834	NA	NA	0.851528	0.853423	62.9383	62.9581	61.0869	64.8293
DLEADEEDTR	2	10	2590	35.7699	NA	NA	0.359452	0.333031	34.3167	34.3727	32.5014	36.244
DLEADIIGDTSGHFQK	2	16	2591	66.6644	NA	NA	0.92117	0.898618	65.424	65.4407	63.5694	67.312
DLEAEHVEVEDTTLNR	2	16	2592	51.8927	NA	NA	0.652594	0.665447	52.5996	52.6325	50.7613	54.5037
DLEAEHVEVEDTTLNR	3	16	2593	51.8927	NA	NA	0.652594	0.665447	52.5996	52.6325	50.7613	54.5037
DLEAHIDSANK	2	11	2594	34.9394	NA	NA	0.344353	0.354086	35.4747	35.5292	33.658	37.4005
DLEALLNSK	2	9	2595	64.0163	NA	NA	0.873023	0.880785	64.4432	64.4611	62.5898	66.3323
DLECVTNLQEVAR	2	13	2597	61.3738	Carbamidomethyl@C	4	0.824978	0.825283	61.3906	61.4124	59.5411	63.2836
DLEDLFYK	2	8	2598	72.2009	NA	NA	1.02183	1.0076	71.4178	71.4269	69.5556	73.2983
DLEEDHACIPIK	2	12	2602	48.007	Carbamidomethyl@C	8	0.581946	0.588577	48.3718	48.41	46.5388	50.2812
DLEEDHACIPIK	3	12	2603	48.007	Carbamidomethyl@C	8	0.581946	0.588577	48.3718	48.41	46.5388	50.2812
DLEEDHACIPIKK	3	13	2604	40.2399	Carbamidomethyl@C	8	0.440725	0.461699	41.3935	41.4405	39.5693	43.3117
DLEGENIEIVFAKPPDQK	2	18	2607	66.824	NA	NA	0.924072	0.936287	67.4958	67.5099	65.6386	69.3812
DLEGSDIDTR	2	10	2609	39.8871	NA	NA	0.43431	0.446904	40.5797	40.6277	38.7565	42.499
DLESLFHR	2	8	2610	58.3249	NA	NA	0.769544	0.772932	58.5113	58.5367	56.6655	60.4079
DLEWVER	2	7	2611	54.5481	NA	NA	0.700875	0.700613	54.5337	54.5641	52.6929	56.4353
DLFDFSTR	2	8	2612	69.2185	NA	NA	0.967609	0.946773	68.0725	68.0859	66.2146	69.9572
DLFHGATFVPR	2	11	2615	59.8645	NA	NA	0.797537	0.807686	60.4227	60.4457	58.5745	62.317
DLFNAIATGK	2	10	2616	63.803	NA	NA	0.869146	0.861953	63.4074	63.4266	61.5554	65.2979
DLFPYEESK	2	9	2617	56.6919	NA	NA	0.739852	0.733815	56.3598	56.388	54.5168	58.2591
DLFQVAFNR	2	9	2618	71.3434	NA	NA	1.00624	0.996969	70.8333	70.8432	68.9718	72.7145
DLGCHVELR	2	9	2621	39.4153	Carbamidomethyl@C	4	0.425733	0.442144	40.3179	40.3663	38.4951	42.2375
DLGEEHFK	2	8	2623	33.613	NA	NA	0.320237	0.344612	34.9536	35.0088	33.1375	36.8801
DLGEEHFK	3	8	2624	33.613	NA	NA	0.320237	0.344612	34.9536	35.0088	33.1375	36.8801
DLGEELEALK	2	10	2625	68.1882	NA	NA	0.948877	0.947773	68.1275	68.1408	66.2695	70.0121
DLGLPTEAYISVEEVHDDGTPTSK	3	24	2627	71.6651	NA	NA	1.01209	1.01178	71.648	71.6569	69.7855	73.5282
DLGLSESGEDVNAAILDESGK	2	21	2628	71.5738	NA	NA	1.01043	0.982355	70.0295	70.0404	68.1691	71.9117
DLGLSESGEDVNAAILDESGKK	2	22	2629	64.1068	NA	NA	0.874669	0.877605	64.2683	64.2864	62.4152	66.1577
DLGTESQIFISR	2	12	2631	63.985	NA	NA	0.872454	0.847997	62.6398	62.66	60.7888	64.5313
DLHDANTDLIGR	2	12	2634	45.1613	NA	NA	0.530206	0.577784	47.7781	47.8171	45.9459	49.6883
DLHPDLEGQLK	2	11	2635	47.162	NA	NA	0.566581	0.592358	48.5797	48.6176	46.7464	50.4888
DLHQGIEAASDEEDLR	2	16	2636	50.434	NA	NA	0.626072	0.617958	49.9877	50.0239	48.1527	51.895
DLIGVQNLLK	2	10	2638	72.8578	NA	NA	1.03378	1.01933	72.0629	72.0713	70.1999	73.9426
DLILPTIQK	2	9	2640	62.8029	NA	NA	0.850962	0.857483	63.1616	63.1811	61.3099	65.0524
DLINLAK	2	7	2641	52.4421	NA	NA	0.662585	0.650593	51.7826	51.8165	49.9453	53.6877
DLIQDQNMDEK	2	11	2642	44.92	NA	NA	0.525818	0.54517	45.9844	46.0256	44.1544	47.8968
DLISHDEMFSDIYK	2	14	2643	67.8434	NA	NA	0.942608	0.949761	68.2368	68.25	66.3787	70.1213
DLISHDEMFSDIYK	3	14	2644	67.8434	NA	NA	0.942608	0.949761	68.2368	68.25	66.3787	70.1213
DLKPENVLLDAHMNAK	3	16	2647	54.9829	NA	NA	0.708779	0.724834	55.8659	55.8946	54.0234	57.7658
DLLAQAR	2	7	2649	37.3261	NA	NA	0.387746	0.437314	40.0523	40.101	38.2298	41.9722
DLLDDLK	2	7	2650	63.8898	NA	NA	0.870724	0.899828	65.4906	65.5072	63.6359	67.3784
DLLEPGCSVLLNHK	2	14	2655	60.1562	Carbamidomethyl@C	7	0.80284	0.799789	59.9884	60.012	58.1407	61.8832
DLLEPGCSVLLNHK	3	14	2656	60.1562	Carbamidomethyl@C	7	0.80284	0.799789	59.9884	60.012	58.1407	61.8832
DLLHPSLEEEK	2	11	2658	50.5975	NA	NA	0.629045	0.6453	51.4915	51.5258	49.6546	53.397
DLLHPSPEEEK	2	11	2659	41.089	NA	NA	0.456163	0.457877	41.1833	41.2305	39.3593	43.1018
DLLIDEWK	2	8	2662	70.4652	NA	NA	0.990277	0.97718	69.7449	69.7561	67.8848	71.6274
DLLLDPAWEK	2	10	2663	71.5738	NA	NA	1.01043	0.998895	70.9392	70.949	69.0776	72.8203
DLLLNTMSQEEK	2	12	2664	60.9024	NA	NA	0.816408	0.814712	60.8092	60.8317	58.9605	62.7029
DLLLTSSYLSDSGSTGEHTK	2	20	2665	60.9629	NA	NA	0.817508	0.829925	61.6459	61.6674	59.7961	63.5386
DLLLTSSYLSDSGSTGEHTK	3	20	2666	60.9629	NA	NA	0.817508	0.829925	61.6459	61.6674	59.7961	63.5386
DLLVENVPYCDAPTQK	2	16	2671	63.2996	Carbamidomethyl@C	10	0.859992	0.86891	63.79	63.8088	61.9376	65.6801
DLLVTGAYEISDQSGGAGGLR	2	21	2673	72.1675	NA	NA	1.02123	0.99976	70.9868	70.9964	69.1251	72.8678
DLMPHDLAR	2	9	2674	45.7446	NA	NA	0.540811	0.538285	45.6057	45.6474	43.7762	47.5186
DLMVGDEASELR	2	12	2676	58.1603	NA	NA	0.76655	0.766583	58.1621	58.1879	56.3167	60.0591
DLNHVCVISETGK	2	13	2677	44.2611	Carbamidomethyl@C	6	0.513839	0.525494	44.9022	44.9448	43.0736	46.8159
DLNSQADSLMTSSAFDTSQVK	2	21	2681	71.8691	NA	NA	1.0158	1.00312	71.1717	71.1811	69.3098	73.0525
DLNSYLEDK	2	9	2682	54.331	NA	NA	0.696928	0.693241	54.1283	54.1592	52.288	56.0304
DLNYCFSGMSDHR	2	13	2683	53.0011	Carbamidomethyl@C	5	0.672747	0.664071	52.5239	52.5569	50.6857	54.4281
DLNYCFSGMSDHR	2	13	2684	45.4462	Carbamidomethyl@C;Oxidation@M	5;9	0.535386	0.535457	45.4501	45.4921	43.6209	47.3632
DLPEHAVLK	2	9	2686	38.6789	NA	NA	0.412343	0.400892	38.049	38.1003	36.229	39.9715
DLPFETLEVEAK	2	12	2687	72.2998	NA	NA	1.02363	1.01881	72.0345	72.0429	70.1715	73.9143
DLPLLLFR	2	8	2688	73.3029	NA	NA	1.04187	1.05261	73.8935	73.8995	72.0281	75.7709
DLPPLLLK	2	8	2689	67.8123	NA	NA	0.942041	0.930176	67.1597	67.1742	65.3029	69.0455
DLPSADSVQYR	2	11	2691	48.4449	NA	NA	0.589907	0.584962	48.1729	48.2114	46.3402	50.0826
DLPTIPGVTSPSSDEPPMEASQSHLR	3	26	2693	67.2617	NA	NA	0.93203	0.930283	67.1655	67.18	65.3087	69.0513
DLQANVEHLVQK	2	12	2697	55.5318	NA	NA	0.718759	0.715055	55.328	55.3574	53.4862	57.2286
DLQENYCR	2	8	2700	33.3227	Carbamidomethyl@C	7	0.314958	0.342537	34.8396	34.8949	33.0236	36.7661
DLQMVNISLR	2	10	2701	67.0111	NA	NA	0.927475	0.906834	65.8759	65.892	64.0207	67.7633
DLQNFLR	2	7	2702	59.7837	NA	NA	0.796068	0.798227	59.9025	59.9261	58.0549	61.7974
DLQNVNITLR	2	10	2703	57.2358	NA	NA	0.749742	0.754362	57.4899	57.5166	55.6454	59.3878
DLQPFPTCQALVYR	2	14	2704	70.2383	Carbamidomethyl@C	8	0.98615	0.977729	69.7751	69.7863	67.915	71.6576
DLQQQLVDAK	2	10	2705	49.7082	NA	NA	0.612876	0.600455	49.025	49.0624	47.1912	50.9336
DLQQYQSQAK	2	10	2706	34.9665	NA	NA	0.344845	0.351049	35.3077	35.3624	33.4912	37.2337
DLQSNVEHLTEK	2	12	2707	50.0474	NA	NA	0.619044	0.622942	50.2618	50.2976	48.4264	52.1688
DLSAAGIGLLAAATQSLSMPASLGR	2	25	2708	73.462	NA	NA	1.04476	1.04196	73.3076	73.3143	71.4429	75.1857
DLSAAGIGLLAAATQSLSMPASLGR	3	25	2709	73.462	NA	NA	1.04476	1.04196	73.3076	73.3143	71.4429	75.1857
DLSELGSVR	2	9	2711	50.5975	NA	NA	0.629045	0.624399	50.3419	50.3777	48.5065	52.2488
DLSEVSETTESTDVK	2	15	2712	48.1165	NA	NA	0.583936	0.58166	47.9913	48.03	46.1588	49.9012
DLSHIGDAVVISCAK	2	15	2714	57.8662	Carbamidomethyl@C	13	0.761204	0.780356	58.9196	58.9445	57.0733	60.8157
DLSHIGDAVVISCAK	3	15	2715	57.8662	Carbamidomethyl@C	13	0.761204	0.780356	58.9196	58.9445	57.0733	60.8157
DLSLDDFK	2	8	2717	62.5692	NA	NA	0.846713	0.829278	61.6103	61.6318	59.7605	63.503
DLSLEEIQK	2	9	2718	54.3077	NA	NA	0.696503	0.698271	54.4049	54.4355	52.5643	56.3067
DLSSVQTLLTK	2	11	2722	67.0733	NA	NA	0.928605	0.948554	68.1704	68.1837	66.3124	70.055
DLSTIEPLK	2	9	2723	55.7656	NA	NA	0.723011	0.723825	55.8104	55.8392	53.968	57.7104
DLSYCLSGMYDHR	2	13	2724	59.0753	Carbamidomethyl@C	5	0.783187	0.769103	58.3007	58.3264	56.4552	60.1976
DLSYCLSGMYDHR	3	13	2725	59.0753	Carbamidomethyl@C	5	0.783187	0.769103	58.3007	58.3264	56.4552	60.1976
DLTDGHFENILADNSVNDQTK	2	21	2726	67.3247	NA	NA	0.933177	0.928584	67.0721	67.0867	65.2154	68.958
DLTDGHFENILADNSVNDQTK	3	21	2727	67.3247	NA	NA	0.933177	0.928584	67.0721	67.0867	65.2154	68.958
DLTDYLMK	2	8	2728	67.7819	NA	NA	0.941489	0.950102	68.2556	68.2687	66.3974	70.14
DLTDYLMK	2	8	2729	59.1036	Oxidation@M	7	0.783702	0.802552	60.1403	60.1637	58.2925	62.0349
DLTEYLSR	2	8	2730	59.5736	NA	NA	0.792248	0.795022	59.7262	59.7501	57.8789	61.6213
DLTSVNILLK	2	10	2733	70.7235	NA	NA	0.994974	0.993045	70.6175	70.6276	68.7563	72.4989
DLTTAGAVTQCYR	2	13	2735	49.9575	Carbamidomethyl@C	11	0.617408	0.626698	50.4684	50.504	48.6328	52.3752
DLTTGYDDSQPDKK	2	14	2736	36.0999	NA	NA	0.365453	0.369249	36.3087	36.3621	34.4909	38.2334
DLVDYITTHYK	2	11	2737	68.223	NA	NA	0.949509	0.936481	67.5065	67.5205	65.6492	69.3918
DLVLSVHNR	2	9	2738	40.1267	NA	NA	0.438668	0.44206	40.3133	40.3617	38.4905	42.2329
DLYANTVLSGGTTMYPGIADR	2	21	2740	73.0939	NA	NA	1.03807	1.03985	73.1915	73.1984	71.327	75.0698
DLYANTVLSGGTTMYPGIADR	2	21	2742	71.077	Oxidation@M	14	1.0014	0.984381	70.141	70.1517	68.2804	72.023
DLYDAGVK	2	8	2744	41.8558	NA	NA	0.470105	0.470745	41.891	41.9374	40.0662	43.8086
DLYLENPEIK	2	10	2746	58.3758	NA	NA	0.770469	0.78311	59.0711	59.0958	57.2246	60.967
DLYSALIK	2	8	2748	64.5552	NA	NA	0.882822	0.872961	64.0128	64.0313	62.1601	65.9026
DMAAPGTSSVPAPTAGNAEK	2	20	2749	47.0273	NA	NA	0.564133	0.566905	47.1798	47.2195	45.3483	49.0907
DMDDEESWIK	2	10	2752	58.7341	NA	NA	0.776985	0.768364	58.26	58.2858	56.4146	60.157
DMEESIR	2	7	2756	35.4934	NA	NA	0.354425	0.347066	35.0886	35.1436	33.2724	37.0149
DMFQETMEAMR	2	11	2758	72.1018	NA	NA	1.02003	0.983525	70.0939	70.1047	68.2334	71.976
DMGYGNWISK	2	10	2761	59.8334	NA	NA	0.79697	0.800189	60.0104	60.0339	58.1627	61.9051
DMNQVLDAYENK	2	12	2770	62.422	NA	NA	0.844036	0.830514	61.6783	61.6997	59.8285	63.5709
DMSPLSETEMALGK	2	14	2772	69.5423	NA	NA	0.973496	0.987003	70.2852	70.2957	68.4244	72.167
DMTLPPETNVILTK	2	14	2773	69.1558	NA	NA	0.966469	0.975615	69.6588	69.6702	67.7988	71.5415
DMTMFVTASK	2	10	2774	58.505	NA	NA	0.772817	0.742111	56.8161	56.8437	54.9725	58.7149
DMVGIAQTGSGK	2	12	2775	42.4089	NA	NA	0.480161	0.477896	42.2843	42.3302	40.459	44.2014
DMVVDIQR	2	8	2778	48.6331	NA	NA	0.593329	0.595462	48.7504	48.7881	46.917	50.6593
DNALLSAIEESR	2	12	2782	70.272	NA	NA	0.986763	0.949568	68.2262	68.2394	66.3681	70.1107
DNALLSAIEESRK	2	13	2783	60.73	NA	NA	0.813272	0.783467	59.0907	59.1154	57.2442	60.9866
DNALTLLIK	2	9	2784	69.6076	NA	NA	0.974683	0.966337	69.1485	69.1605	67.2892	71.0319
DNAMLEYLK	2	9	2785	63.479	NA	NA	0.863254	0.890897	64.9994	65.0166	63.1453	66.8879
DNCPNLPNSGQEDYDK	2	16	2786	43.8854	Carbamidomethyl@C	3	0.507007	0.496544	43.3099	43.3545	41.4833	45.2257
DNFGFIETANHDK	2	13	2789	51.998	NA	NA	0.65451	0.620605	50.1333	50.1693	48.2981	52.0405
DNFTLIPEGTNGTEER	2	16	2790	61.9518	NA	NA	0.835487	0.823651	61.3008	61.3227	59.4515	63.1939
DNFWEMGDTGPCGPCSEIHYDR	3	22	2791	68.1307	Carbamidomethyl@C;Carbamidomethyl@C	12;15	0.94783	0.950117	68.2565	68.2696	66.3983	70.1409
DNFYFDVK	2	8	2793	60.73	NA	NA	0.813272	0.818589	61.0224	61.0446	59.1734	62.9159
DNGNGTYSCSYVPR	2	14	2794	44.6054	Carbamidomethyl@C	9	0.520098	0.520674	44.6371	44.68	42.8088	46.5512
DNHLLGTFDLTGIPPAPR	2	18	2795	73.0103	NA	NA	1.03655	1.03148	72.7312	72.7387	70.8673	74.6101
DNICGALAR	2	9	2798	41.536	Carbamidomethyl@C	4	0.464291	0.468741	41.7807	41.8273	39.9561	43.6985
DNIQAMVIVPTR	2	12	2800	62.3949	NA	NA	0.843543	0.843123	62.3718	62.3923	60.5211	64.2635
DNIQGITK	2	8	2801	32.6013	NA	NA	0.301842	0.312696	33.1983	33.2557	31.3844	35.1269
DNLAEDIMR	2	9	2802	60.2156	NA	NA	0.803919	0.782442	59.0343	59.0591	57.1879	60.9303
DNLTLWTSDMQGDGEEQNK	2	19	2810	67.4451	NA	NA	0.935366	0.944024	67.9213	67.9349	66.0636	69.8062
DNLTLWTSDMQGDGEEQNK	2	19	2811	60.0374	Oxidation@M	10	0.800681	0.805502	60.3026	60.3258	58.4545	62.197
DNLTLWTSENQGDEGDAGEGEN	2	22	2814	71.6338	NA	NA	1.01152	1.01166	71.641	71.6499	69.7785	73.5212
DNMALQR	2	7	2815	31.0645	NA	NA	0.273901	0.259065	30.2486	30.3096	28.4383	32.181
DNNQFASASLDR	2	12	2819	45.577	NA	NA	0.537764	0.541176	45.7647	45.8062	43.935	47.6774
DNPGVVTCLDEAR	2	13	2820	51.7884	Carbamidomethyl@C	8	0.650699	0.655766	52.0671	52.1007	50.2295	53.9719
DNQHQDEAEGDPGNRHEPR	3	19	2822	23.5665	NA	NA	0.137573	0.137841	23.5813	23.6508	21.7793	25.5222
DNQLSEVANK	2	10	2823	36.281	NA	NA	0.368746	0.366718	36.1695	36.2231	34.3518	38.0943
DNSTMGYMAAK	2	11	2824	41.3648	NA	NA	0.461179	0.461079	41.3594	41.4064	39.5352	43.2776
DNSTMGYMMAK	2	11	2825	49.4311	NA	NA	0.607838	0.590612	48.4837	48.5218	46.6506	50.3929
DNSTMGYMMAK	2	11	2826	42.0499	Oxidation@M	9	0.473634	0.466599	41.6629	41.7096	39.8384	43.5808
DNSTMGYMAAK	2	11	2827	32.9508	Oxidation@M	8	0.308196	0.299194	32.4557	32.514	30.6427	34.3853
DNSTMGYMAAK	2	11	2828	33.7291	Oxidation@M	5	0.322347	0.323467	33.7907	33.8473	31.976	35.7186
DNSTMGYMMAK	2	11	2829	40.5183	Oxidation@M	5	0.445788	0.432297	39.7763	39.8254	37.9542	41.6966
DNTINLIHTFR	2	11	2830	57.9849	NA	NA	0.763361	0.753023	57.4162	57.443	55.5718	59.3143
DNTINLIHTFR	3	11	2831	57.9849	NA	NA	0.763361	0.753023	57.4162	57.443	55.5718	59.3143
DNTRPGANSPEMWSEAIK	2	18	2834	54.4943	NA	NA	0.699897	0.699276	54.4602	54.4907	52.6195	56.3619
DNVDDPTGNFR	2	11	2837	44.5794	NA	NA	0.519626	0.511069	44.1088	44.1524	42.2812	46.0236
DNWSPALTISK	2	11	2839	59.6043	NA	NA	0.792805	0.792998	59.6149	59.6389	57.7677	61.5101
DPAEGDGAQPEETPR	2	15	2843	33.7845	NA	NA	0.323355	0.318934	33.5414	33.5983	31.727	35.4696
DPANFQYPAESVLAYK	2	16	2844	71.5386	NA	NA	1.00979	0.987324	70.3028	70.3134	68.442	72.1847
DPAQPMSPGEATQSGAR	2	17	2845	39.1141	NA	NA	0.420256	0.416034	38.8818	38.932	37.0608	40.8033
DPASDQMQHWK	2	11	2846	40.8756	NA	NA	0.452283	0.430998	39.7049	39.754	37.8828	41.6252
DPDAQPGGELMLGGTDSK	2	18	2849	56.4105	NA	NA	0.734737	0.741003	56.7552	56.7828	54.9116	58.654
DPDASKPEDWDER	2	13	2850	40.0997	NA	NA	0.438177	0.442461	40.3354	40.3837	38.5125	42.255
DPDASKPEDWDER	3	13	2851	40.0464	NA	NA	0.437208	0.442461	40.3354	40.3837	38.5125	42.255
DPEAPIFQVADYGIVADLFK	2	20	2856	73.462	NA	NA	1.04476	1.04805	73.643	73.6493	71.778	75.5207
DPEEADYCIQTLDGR	2	15	2857	59.0161	Carbamidomethyl@C	8	0.782111	0.763159	57.9738	57.9999	56.1287	59.8711
DPEGFVGHPVNAFK	2	14	2858	52.4421	NA	NA	0.662585	0.667082	52.6895	52.7223	50.8511	54.5935
DPELGLK	2	7	2859	40.8445	NA	NA	0.451719	0.446386	40.5512	40.5993	38.7281	42.4705
DPESNINSDNEK	2	12	2862	29.1945	NA	NA	0.2399	0.254371	29.9904	30.0518	28.1805	31.9231
DPFAHLPK	2	8	2863	43.4952	NA	NA	0.499913	0.501199	43.5659	43.6102	41.739	45.4814
DPGMGAMGGMGGGMGGGMF	2	19	2866	73.3704	NA	NA	1.0431	1.06118	74.3648	74.3702	72.4988	76.2416
DPGVLDR	2	7	2869	34.2423	NA	NA	0.331678	0.334559	34.4008	34.4566	32.5853	36.3279
DPILFPSFIHSQK	3	13	2871	68.4646	NA	NA	0.953902	0.950714	68.2892	68.3023	66.431	70.1736
DPIPYLPPLEK	2	11	2872	70.4987	NA	NA	0.990885	1.00156	71.0859	71.0954	69.2241	72.9668
DPLLASGTDGVGTK	2	14	2876	48.5531	NA	NA	0.591874	0.593932	48.6663	48.7041	46.8329	50.5753
DPLNPIK	2	7	2879	41.8558	NA	NA	0.470105	0.448108	40.6459	40.6939	38.8227	42.5651
DPMLLSGTHVMEGSGR	2	16	2881	54.331	NA	NA	0.696928	0.701773	54.5975	54.6279	52.7567	56.4991
DPNCVGTVLASR	2	12	2884	48.9577	Carbamidomethyl@C	4	0.599231	0.594668	48.7067	48.7445	46.8733	50.6157
DPNDVRPIQAR	2	11	2885	32.3511	NA	NA	0.297292	0.326962	33.9829	34.0393	32.168	35.9106
DPNIVIAK	2	8	2886	42.0499	NA	NA	0.473634	0.435346	39.944	39.9929	38.1216	41.8641
DPNNLLNDWSQK	2	12	2887	63.5348	NA	NA	0.864269	0.866354	63.6495	63.6684	61.7971	65.5396
DPNSPLYSVK	2	10	2888	45.9845	NA	NA	0.545172	0.538841	45.6363	45.678	43.8068	47.5491
DPNVVGQLAK	2	10	2890	45.7739	NA	NA	0.541343	0.549012	46.1956	46.2366	44.3654	48.1078
DPQALSEHLK	2	10	2892	36.5813	NA	NA	0.374206	0.378586	36.8222	36.875	35.0038	38.7462
DPQVLFAGYK	2	10	2894	59.3296	NA	NA	0.787812	0.774108	58.5759	58.6013	56.7301	60.4725
DPSQIDNNEPYMK	2	13	2897	46.4656	NA	NA	0.55392	0.531979	45.2589	45.301	43.4298	47.1722
DPSSGQEVATPPVPQLQVCEPK	2	22	2898	65.1215	Carbamidomethyl@C	19	0.893118	0.866391	63.6515	63.6704	61.7992	65.5417
DPVQEAWAEDVDLR	2	14	2903	70.2383	NA	NA	0.98615	0.974326	69.5879	69.5993	67.728	71.4707
DPVQEAWAEDVDLR	3	14	2904	70.2383	NA	NA	0.98615	0.974326	69.5879	69.5993	67.728	71.4707
DPVQVAAPSDHGVGIEPVFPENTENSEK	3	28	2905	64.0163	NA	NA	0.873023	0.873882	64.0635	64.0819	62.2107	65.9532
DPWYSWDQPGLR	2	12	2906	72.4939	NA	NA	1.02716	0.996717	70.8194	70.8293	68.958	72.7007
DPYTGQQISLFQAMQK	2	16	2910	72.6613	NA	NA	1.03021	1.01606	71.8832	71.8917	70.0204	73.7631
DQAVENILVSPVVVASSLGLVSLGGK	2	26	2912	73.4905	NA	NA	1.04528	1.04787	73.6327	73.639	71.7676	75.5104
DQDELKPGPTNR	2	12	2915	29.7018	NA	NA	0.249124	0.235203	28.9362	28.9989	27.1276	30.8703
DQDLASCDRDR	2	11	2917	27.0497	Carbamidomethyl@C	7	0.200903	0.203463	27.1904	27.2554	25.384	29.1268
DQDLEPGAPSMGAK	2	14	2918	45.2091	NA	NA	0.531075	0.506327	43.848	43.8919	42.0207	45.7631
DQDLTQEIAMEHFVK	2	15	2920	64.4364	NA	NA	0.880661	0.894574	65.2016	65.2185	63.3473	67.0898
DQDNMQAELNR	2	11	2921	40.8445	NA	NA	0.451719	0.437491	40.062	40.1107	38.2395	41.9819
DQEFTVDTR	2	9	2922	42.6456	NA	NA	0.484465	0.467862	41.7324	41.779	39.9078	43.6502
DQEFTVK	2	7	2923	35.9331	NA	NA	0.362419	0.367664	36.2215	36.2751	34.4038	38.1463
DQFTTTEVNMAR	2	12	2927	50.3576	NA	NA	0.624684	0.62759	50.5174	50.5529	48.6818	52.4241
DQGGELLSLR	2	10	2928	56.4105	NA	NA	0.734737	0.702904	54.6597	54.69	52.8188	56.5612
DQGTYEDYVEGLR	2	13	2929	63.3872	NA	NA	0.861586	0.875328	64.143	64.1613	62.2901	66.0326
DQIYDIFQK	2	9	2932	66.6644	NA	NA	0.92117	0.906585	65.8622	65.8783	64.0071	67.7496
DQLALAIGK	2	9	2933	52.6091	NA	NA	0.665619	0.667946	52.7371	52.7698	50.8986	54.6409
DQLIYNLLK	2	9	2934	72.3664	NA	NA	1.02484	1.00545	71.2998	71.3091	69.4378	73.1805
DQLLAAK	2	7	2935	33.2692	NA	NA	0.313985	0.33665	34.5157	34.5715	32.7002	36.4427
DQLLLGPTYATPK	2	13	2936	61.1373	NA	NA	0.820679	0.821891	61.204	61.226	59.3548	63.0972
DQLPADECNK	2	10	2937	30.291	Carbamidomethyl@C	8	0.259836	0.252482	29.8865	29.9481	28.0768	31.8194
DQLQTFSEEHPVLLTEAPLNPR	3	22	2939	71.5738	NA	NA	1.01043	1.00198	71.109	71.1186	69.2472	72.9899
DQMYYNLLK	2	9	2943	63.1582	NA	NA	0.857421	0.87729	64.2509	64.2691	62.3978	66.1404
DQNESLDEEMFYK	2	13	2944	61.9803	NA	NA	0.836005	0.820426	61.1234	61.1456	59.2743	63.0168
DQSAVVVQGLPEGVAFK	2	17	2945	70.0401	NA	NA	0.982548	0.960641	68.8352	68.8476	66.9763	70.7189
DQTPDENDQVIVK	2	13	2946	42.2923	NA	NA	0.478042	0.489695	42.9332	42.9783	41.1071	44.8495
DQVAIHEAMEQQTISITK	3	18	2947	56.0747	NA	NA	0.72863	0.735867	56.4727	56.5007	54.6295	58.3719
DQVANSAFVER	2	11	2948	42.8618	NA	NA	0.488395	0.490109	42.956	43.0011	41.1299	44.8723
DQVTAQEIFQDNHEDGPTAK	2	20	2953	52.7995	NA	NA	0.669082	0.668166	52.7491	52.7818	50.9106	54.653
DQVTAQEIFQDNHEDGPTAK	3	20	2954	52.7995	NA	NA	0.669082	0.668166	52.7491	52.7818	50.9106	54.653
DQVYPQYVIEYTEDK	2	15	2955	69.3143	NA	NA	0.969351	0.93852	67.6186	67.6325	65.7613	69.5038
DQWAAAMTLR	2	10	2956	61.7215	NA	NA	0.831299	0.819821	61.0902	61.1123	59.2411	62.9836
DQYANYVVQK	2	10	2957	44.1462	NA	NA	0.51175	0.5015	43.5825	43.6268	41.7556	45.498
DRDSQITAIEK	2	11	2959	35.1825	NA	NA	0.348772	0.314556	33.3006	33.3578	31.4866	35.2291
DRDVQDETYR	2	10	2960	28.6196	NA	NA	0.229447	0.231948	28.7571	28.8201	26.9488	30.6915
DRDYSDHPSGGSYR	2	14	2962	27.2681	NA	NA	0.204874	0.208962	27.4929	27.5575	25.6861	29.4289
DRDYSDHPSGGSYR	3	14	2963	27.2681	NA	NA	0.204874	0.208962	27.4929	27.5575	25.6861	29.4289
DREEALHQFR	2	10	2964	32.4838	NA	NA	0.299706	0.304831	32.7657	32.8236	30.9523	34.6949
DREEDEEDAYER	2	12	2965	32.3775	NA	NA	0.297773	0.306907	32.8799	32.9376	31.0664	34.8089
DRGFELTFK	2	9	2966	52.9448	NA	NA	0.671724	0.667122	52.6917	52.7245	50.8533	54.5957
DRLEFWCTDVK	2	11	2967	59.6603	Carbamidomethyl@C	7	0.793823	0.769288	58.3108	58.3365	56.4653	60.2077
DRLNSAIIYDR	2	11	2968	45.9151	NA	NA	0.543911	0.547858	46.1322	46.1733	44.3021	48.0444
DRPFFAGLVK	2	10	2969	58.7936	NA	NA	0.778066	0.729046	56.0976	56.126	54.2548	57.9972
DRPFFPGLVK	2	10	2970	57.3165	NA	NA	0.751209	0.717161	55.4439	55.4731	53.602	57.3443
DRPFFPGLVK	3	10	2971	57.3165	NA	NA	0.751209	0.717161	55.4439	55.4731	53.602	57.3443
DRVNDVCTNGQDLIK	2	15	2972	45.5222	Carbamidomethyl@C	7	0.536767	0.535914	45.4753	45.5172	43.646	47.3883
DRVTDALNATR	2	11	2973	43.2525	NA	NA	0.495499	0.464675	41.5571	41.604	39.7328	43.4752
DRYDSFIELQEK	2	12	2975	56.5848	NA	NA	0.737905	0.731905	56.2548	56.283	54.4118	58.1542
DRYDSFIELQEK	3	12	2976	56.6919	NA	NA	0.739852	0.731905	56.2548	56.283	54.4118	58.1542
DSAAFEDNEVQDEFLEK	2	17	2977	67.6314	NA	NA	0.938753	0.932957	67.3126	67.3269	65.4556	69.1982
DSAQTSVTQAQR	2	12	2979	28.2566	NA	NA	0.222847	0.226606	28.4633	28.5267	26.6553	30.398
DSCIGVDDR	2	9	2983	34.5805	Carbamidomethyl@C	3	0.337827	0.339267	34.6597	34.7152	32.8439	36.5865
DSCPLDCK	2	8	2984	30.89	Carbamidomethyl@C;Carbamidomethyl@C	3;7	0.270727	0.271776	30.9477	31.0079	29.1366	32.8792
DSDAGSSTPTTSTR	2	14	2985	26.2719	NA	NA	0.186762	0.183784	26.1081	26.1745	24.3031	28.0458
DSDDVPMVLVGNK	2	13	2986	61.8654	NA	NA	0.833916	0.831823	61.7503	61.7716	59.9004	63.6428
DSDGDGIGDACDNCPQK	2	17	2987	33.4694	Carbamidomethyl@C;Carbamidomethyl@C	11;14	0.317625	0.350517	35.2785	35.3332	33.4619	37.2045
[truncated: 12,025 more rows]

## Sheet: Arg-starting Peptides
sequence	charge	nAA	index	irt	mods	mod_sites	rt_norm	rt_pred	irt_pred	fit	lwr	upr
RAAEDDEDDDVDTK	2	14	14611	24.8525	NA	NA	0.160954	0.167857	25.2321	25.2995	23.4281	27.171
RAAEDDEDDDVDTK	3	14	14612	24.8171	NA	NA	0.160312	0.167857	25.2321	25.2995	23.4281	27.171
RAEDGSVIDYELIDQDAR	2	18	14613	59.9237	NA	NA	0.798613	0.795374	59.7456	59.7694	57.8982	61.6406
RAEDGSVIDYELIDQDAR	3	18	14614	59.9545	NA	NA	0.799172	0.795374	59.7456	59.7694	57.8982	61.6406
RAEFTVETR	2	9	14615	31.8154	NA	NA	0.287553	0.290633	31.9848	32.0437	30.1724	33.915
RAESMLQQADK	2	11	14616	29.3874	NA	NA	0.243408	0.246762	29.5719	29.6339	27.7625	31.5052
RAESMLQQADK	3	11	14617	29.4157	NA	NA	0.243922	0.246762	29.5719	29.6339	27.7625	31.5052
RAEVSPMYGVQK	2	12	14618	35.41	NA	NA	0.352909	0.352044	35.3624	35.4171	33.5458	37.2883
RAFLIEEQK	2	9	14619	37.3964	NA	NA	0.389026	0.390295	37.4662	37.5182	35.647	39.3894
RAGELTEDEVER	2	12	14620	32.8112	NA	NA	0.305658	0.303879	32.7134	32.7713	30.9	34.6426
RAGGEESQFEMDI	2	13	14622	57.2358	NA	NA	0.749742	0.755439	57.5491	57.5758	55.7046	59.447
RALELEQER	2	9	14623	31.1509	NA	NA	0.27547	0.280201	31.4111	31.4707	29.5994	33.342
RALEQQVEEMK	2	11	14624	37.5553	NA	NA	0.391915	0.404918	38.2705	38.3215	36.4503	40.1927
RANEFLEVGK	2	10	14625	38.6789	NA	NA	0.412343	0.413518	38.7435	38.7939	36.9226	40.6651
RAPDQAAEIGSR	2	12	14626	28.0806	NA	NA	0.219648	0.217247	27.9486	28.0126	26.1412	29.8839
RAPDQAAEIGSR	3	12	14627	28.0806	NA	NA	0.219648	0.217247	27.9486	28.0126	26.1412	29.8839
RAPFDLFENK	2	10	14628	56.8254	NA	NA	0.74228	0.760151	57.8083	57.8346	55.9634	59.7058
RAPFDLFENR	2	10	14629	58.1837	NA	NA	0.766977	0.787371	59.3054	59.3298	57.4586	61.2011
RDAALAVAEAMADK	2	14	14631	53.7834	NA	NA	0.686972	0.681425	53.4784	53.5102	51.639	55.3813
RDAEDAMDAMDGAVLDGR	2	18	14632	61.0802	NA	NA	0.819639	0.822536	61.2395	61.2615	59.3902	63.1327
RDAEDAMDAMDGAVLDGR	3	18	14633	61.0541	NA	NA	0.819166	0.822536	61.2395	61.2615	59.3902	63.1327
RDFAPPGQQK	2	10	14635	27.9955	NA	NA	0.218101	0.19529	26.7409	26.8065	24.9351	28.6778
RDFAPPGQQK	3	10	14636	27.9955	NA	NA	0.218101	0.19529	26.7409	26.8065	24.9351	28.6778
RDIDNLVQR	2	9	14638	36.7867	NA	NA	0.37794	0.391376	37.5257	37.5776	35.7063	39.4488
RDIQENDEEAVQVK	2	14	14639	34.9114	NA	NA	0.343843	0.324599	33.8529	33.9095	32.0382	35.7807
RDLEGSDIDTR	2	11	14640	31.9236	NA	NA	0.289519	0.303929	32.7161	32.7741	30.9028	34.6454
RDLGEELEALK	2	11	14641	54.2488	NA	NA	0.695433	0.697901	54.3846	54.4152	52.544	56.2864
RDLGEELEALK	3	11	14642	54.2794	NA	NA	0.69599	0.697901	54.3846	54.4152	52.544	56.2864
RDLILTPK	2	8	14643	37.7778	NA	NA	0.395959	0.367725	36.2248	36.2784	34.4071	38.1496
RDLMACAQTGSGK	2	13	14644	31.2349	Carbamidomethyl@C	6	0.276997	0.27105	30.9077	30.968	29.0967	32.8393
RDLMACAQTGSGK	3	13	14645	31.2093	Carbamidomethyl@C	6	0.276534	0.27105	30.9077	30.968	29.0967	32.8393
RDPALNSGVSQKPDPAK	3	17	14646	29.6169	NA	NA	0.24758	0.259266	30.2596	30.3207	28.4494	32.192
RDPEEDGMMK	2	10	14647	28.68	NA	NA	0.230546	0.232507	28.7879	28.8508	26.9795	30.7222
RDTLALLQK	2	9	14649	41.5116	NA	NA	0.463847	0.446515	40.5583	40.6064	38.7352	42.4776
RDVTQLDPNK	2	10	14651	30.6904	NA	NA	0.267098	0.259906	30.2948	30.3559	28.4846	32.2272
REAPVDVLTQIGR	2	13	14652	55.3356	NA	NA	0.715193	0.723001	55.7651	55.7939	53.9228	57.6651
REAPVDVLTQIGR	3	13	14653	55.3356	NA	NA	0.715193	0.723001	55.7651	55.7939	53.9228	57.6651
REATADDLIK	2	10	14654	33.5586	NA	NA	0.319247	0.290866	31.9976	32.0565	30.1852	33.9278
REDEEESLNEVGYDDIGGCR	2	20	14655	53.2426	Carbamidomethyl@C	19	0.677138	0.697216	54.3469	54.3776	52.5064	56.2487
REDEEESLNEVGYDDIGGCR	3	20	14656	53.2426	Carbamidomethyl@C	19	0.677138	0.697216	54.3469	54.3776	52.5064	56.2487
REDIFYTSK	2	9	14657	36.6875	NA	NA	0.376136	0.409624	38.5293	38.5799	36.7087	40.4512
REDLVVAPAGITLK	2	14	14658	56.6623	NA	NA	0.739314	0.733039	56.3171	56.3453	54.4741	58.2165
REDLVVAPAGITLK	3	14	14659	56.6623	NA	NA	0.739314	0.733039	56.3171	56.3453	54.4741	58.2165
REEAIQNFK	2	9	14660	30.0912	NA	NA	0.256204	0.257033	30.1368	30.1981	28.3267	32.0694
REEEEFNTGPLSVLTQSVK	3	19	14662	69.1229	NA	NA	0.965871	0.977663	69.7715	69.7827	67.9114	71.654
REEETLDTIK	2	10	14663	32.8704	NA	NA	0.306735	0.310264	33.0645	33.1221	31.2508	34.9934
REELFIVSK	2	9	14664	44.4724	NA	NA	0.51768	0.532275	45.2751	45.3173	43.4461	47.1885
REELSNVLAAMR	2	12	14665	56.6101	NA	NA	0.738366	0.756074	57.5841	57.6107	55.7394	59.4819
REELSNVLAAMR	3	12	14666	56.6101	NA	NA	0.738366	0.756074	57.5841	57.6107	55.7394	59.4819
REFPTVPLVK	2	10	14667	49.8181	NA	NA	0.614875	0.5752	47.636	47.6752	45.804	49.5463
REGTGTEMPMIGDR	3	14	14668	42.8875	NA	NA	0.488864	0.484493	42.6471	42.6926	40.8214	44.5638
RELDSITPEVLPGWK	3	15	14669	65.542	NA	NA	0.900764	0.906366	65.8501	65.8663	63.995	67.7376
RELHGQNPVVTPCNK	3	15	14670	28.931	Carbamidomethyl@C	13	0.23511	0.23609	28.985	29.0476	27.1763	30.919
RELHPPATSHEAPGTK	4	16	14671	25.7258	NA	NA	0.176833	0.184171	26.1294	26.1957	24.3243	28.0671
RELNYVAR	2	8	14672	28.7388	NA	NA	0.231615	0.240232	29.2128	29.2752	27.4038	31.1465
RELQELVQYPVEHPDK	3	16	14673	48.8463	NA	NA	0.597205	0.587668	48.3217	48.36	46.4888	50.2312
RELQPSEEVTWK	2	12	14674	43.1999	NA	NA	0.494543	0.472001	41.9601	42.0064	40.1352	43.8776
RENFCNIHVSLVPQPSSTGEQK	3	22	14676	51.4877	Carbamidomethyl@C	5	0.645231	0.644155	51.4285	51.4629	49.5917	53.3341
REPLSLINVR	2	10	14677	49.2638	NA	NA	0.604797	0.607585	49.4172	49.4541	47.5829	51.3253
REQEVNILK	2	9	14679	33.1797	NA	NA	0.312359	0.315501	33.3526	33.4097	31.5385	35.281
REQGNIEEAVR	2	11	14680	29.7566	NA	NA	0.25012	0.246214	29.5418	29.6038	27.7324	31.4751
RESQSVEEALK	2	11	14681	30.7745	NA	NA	0.268627	0.236846	29.0265	29.0892	27.2178	30.9605
RESVELALK	2	9	14682	36.9359	NA	NA	0.380652	0.359	35.745	35.7991	33.9279	37.6704
RESVLTATSILNNPIVK	3	17	14683	64.6742	NA	NA	0.884985	0.82213	61.2171	61.2391	59.3679	63.1104
REVDDLGPEVGDIK	2	14	14684	48.3044	NA	NA	0.587353	0.59842	48.9131	48.9506	47.0794	50.8218
REVDDLGPEVGDIK	3	14	14685	48.3293	NA	NA	0.587806	0.59842	48.9131	48.9506	47.0794	50.8218
RFDDAVVQSDMK	2	12	14687	42.2052	NA	NA	0.476457	0.469896	41.8443	41.8907	40.0195	43.7619
RFDDAVVQSDMK	3	12	14688	42.2052	NA	NA	0.476457	0.469896	41.8443	41.8907	40.0195	43.7619
RFDDAVVQSDMK	3	12	14689	35.4934	Oxidation@M	11	0.354425	0.357724	35.6748	35.7291	33.8578	37.6003
RFDEILEASDGIMVAR	2	16	14690	68.8776	NA	NA	0.961411	0.992236	70.573	70.5832	68.7118	72.4545
RFDEILEASDGIMVAR	3	16	14691	68.8776	NA	NA	0.961411	0.992236	70.573	70.5832	68.7118	72.4545
RFDVSGYPTLK	2	11	14693	49.7082	NA	NA	0.612876	0.611694	49.6432	49.6798	47.8086	51.551
RFEELGVK	2	8	14694	35.4357	NA	NA	0.353377	0.354512	35.4982	35.5526	33.6814	37.4239
RFPGYDSESK	2	10	14697	31.8376	NA	NA	0.287956	0.282837	31.5561	31.6155	29.7442	33.4868
RFVEVGR	2	7	14698	29.3296	NA	NA	0.242357	0.248296	29.6563	29.7181	27.8468	31.5895
RGAPAAATAPAPTAHK	2	16	14699	24.9567	NA	NA	0.16285	0.163115	24.9713	25.0391	23.1677	26.9105
RGAPAAATAPAPTAHK	3	16	14700	24.9567	NA	NA	0.16285	0.163115	24.9713	25.0391	23.1677	26.9105
RGDACEGDSGGPFVMK	3	16	14702	40.3206	Carbamidomethyl@C	5	0.442192	0.442593	40.3426	40.391	38.5198	42.2622
RGDFIPGLR	2	9	14703	46.4122	NA	NA	0.552949	0.523242	44.7783	44.821	42.9498	46.6922
RGDLPFVVPR	2	10	14704	51.516	NA	NA	0.645746	0.647731	51.6252	51.6593	49.7881	53.5305
RGDLPFVVPR	3	10	14705	51.5467	NA	NA	0.646304	0.647731	51.6252	51.6593	49.7881	53.5305
RGDTVATLSER	2	11	14706	30.7475	NA	NA	0.268135	0.265177	30.5847	30.6454	28.7741	32.5167
RGETESEEFEK	2	11	14708	27.1763	NA	NA	0.203206	0.209787	27.5383	27.6028	25.7314	29.4742
RGFAFVTFDDHDSVDK	3	16	14709	55.8521	NA	NA	0.724584	0.718365	55.5101	55.5393	53.6681	57.4105
RGGPNYQEGLR	2	11	14710	29.7277	NA	NA	0.249594	0.24555	29.5052	29.5673	27.6959	31.4386
RGIPGLPDGR	3	10	14712	40.7913	NA	NA	0.450751	0.446207	40.5414	40.5895	38.7183	42.4607
RGPCIIYNEDNGIIK	2	15	14713	50.9616	Carbamidomethyl@C	4	0.635665	0.636853	51.0269	51.0618	49.1906	52.9329
RGPGLYYVDSEGNR	2	14	14715	42.2635	NA	NA	0.477518	0.480349	42.4192	42.4649	40.5937	44.3361
RGPGLYYVDSEGNR	3	14	14716	42.2635	NA	NA	0.477518	0.480349	42.4192	42.4649	40.5937	44.3361
RGPQLVCTGSDDGTVK	2	16	14717	35.9875	Carbamidomethyl@C	7	0.363408	0.366083	36.1346	36.1882	34.317	38.0595
RGPQLVCTGSDDGTVK	3	16	14718	36.0152	Carbamidomethyl@C	7	0.363913	0.366083	36.1346	36.1882	34.317	38.0595
RGTDECAIESIAVAATPIPK	3	20	14720	64.4973	Carbamidomethyl@C	6	0.881769	0.893279	65.1303	65.1474	63.2761	67.0187
RGVFNVQMEPK	2	11	14722	43.622	NA	NA	0.502217	0.490336	42.9685	43.0135	41.1423	44.8847
RGVFNVQMEPK	3	11	14723	43.622	NA	NA	0.502217	0.490336	42.9685	43.0135	41.1423	44.8847
RHATAEEVEEEERDR	4	15	14724	27.2998	NA	NA	0.20545	0.199184	26.9551	27.0204	25.149	28.8918
RHLEAILTK	3	9	14725	30.438	NA	NA	0.262509	0.245213	29.4867	29.5487	27.6774	31.4201
RIANLQTDLSDGLR	3	14	14727	52.7995	NA	NA	0.669082	0.67551	53.153	53.1852	51.314	55.0564
RIEQHYFEDR	3	10	14728	32.8413	NA	NA	0.306205	0.307356	32.9046	32.9623	31.091	34.8336
RILELDQFK	2	9	14730	51.516	NA	NA	0.645746	0.63721	51.0466	51.0814	49.2102	52.9526
RILMEHIHK	3	9	14731	26.6478	NA	NA	0.193597	0.197042	26.8373	26.9027	25.0313	28.7741
RIPIPELEAR	2	10	14733	50.5681	NA	NA	0.628511	0.637293	51.0511	51.086	49.2148	52.9571
RISGLIYEETR	2	11	14734	42.995	NA	NA	0.490818	0.525601	44.908	44.9506	43.0794	46.8218
RISGLIYEETR	3	11	14735	43.6459	NA	NA	0.502654	0.525601	44.908	44.9506	43.0794	46.8218
RIVEGILK	2	8	14736	37.3466	NA	NA	0.388119	0.385695	37.2132	37.2655	35.3943	39.1368
RKEDEVEEWQHR	3	12	14737	28.989	NA	NA	0.236164	0.265131	30.5822	30.6429	28.7716	32.5142
RKEDEVEEWQHR	4	12	14738	29.0212	NA	NA	0.236749	0.265131	30.5822	30.6429	28.7716	32.5142
RKPDTIEVQQMK	2	12	14739	30.0912	NA	NA	0.256204	0.259579	30.2769	30.3379	28.4666	32.2092
RKPDTIEVQQMK	3	12	14740	30.0912	NA	NA	0.256204	0.259579	30.2769	30.3379	28.4666	32.2092
RKPEDVLDDDDAGSAPLK	2	18	14741	43.8346	NA	NA	0.506084	0.504814	43.7648	43.8088	41.9376	45.68
RKPEDVLDDDDAGSAPLK	3	18	14742	43.805	NA	NA	0.505546	0.504814	43.7648	43.8088	41.9376	45.68
RLDFDYK	2	7	14745	39.662	NA	NA	0.430219	0.467807	41.7294	41.776	39.9048	43.6472
RLDLPIER	2	8	14746	44.92	NA	NA	0.525818	0.532644	45.2954	45.3375	43.4663	47.2087
RLDVFEK	2	7	14747	36.4764	NA	NA	0.372299	0.385524	37.2038	37.2561	35.3849	39.1274
RLEAAYLDLQR	2	11	14748	49.5977	NA	NA	0.610868	0.62772	50.5246	50.5601	48.6889	52.4313
RLEAFLTQK	2	9	14749	41.773	NA	NA	0.4686	0.457131	41.1422	41.1895	39.3183	43.0607
RLEEEEAAAEK	2	11	14750	26.9791	NA	NA	0.19962	0.205045	27.2775	27.3423	25.471	29.2137
RLEEIMK	2	7	14751	31.49	NA	NA	0.281635	0.297862	32.3824	32.4408	30.5695	34.3121
RLEEIPLIK	2	9	14752	49.9575	NA	NA	0.617408	0.615878	49.8733	49.9096	48.0384	51.7808
RLEELEAK	2	8	14753	28.8741	NA	NA	0.234074	0.226423	28.4533	28.5166	26.6453	30.388
RLEESDVLQEAR	2	12	14755	42.6456	NA	NA	0.484465	0.49486	43.2173	43.262	41.3908	45.1332
RLEESDVLQEAR	3	12	14756	42.6665	NA	NA	0.484846	0.49486	43.2173	43.262	41.3908	45.1332
RLEEWLGR	2	8	14757	45.2364	NA	NA	0.53157	0.525993	44.9296	44.9722	43.101	46.8433
RLEQLGAQR	2	9	14758	27.7562	NA	NA	0.213749	0.224824	28.3653	28.4288	26.5574	30.3001
RLEVLDSTK	2	9	14759	33.8975	NA	NA	0.325409	0.347568	35.1162	35.1712	33.2999	37.0425
RLGSLVDEFK	2	10	14760	50.7905	NA	NA	0.632555	0.63671	51.0191	51.0539	49.1828	52.9251
RLIPDGCGVK	2	10	14761	35.3822	Carbamidomethyl@C	7	0.352403	0.35033	35.2682	35.3229	33.4517	37.1942
RLLDQIVEK	2	9	14762	44.6054	NA	NA	0.520098	0.523126	44.772	44.8147	42.9435	46.6859
RLNVWDLSK	2	9	14763	50.333	NA	NA	0.624237	0.617708	49.9739	50.0101	48.1389	51.8813
RLPALLEK	2	8	14764	41.01	NA	NA	0.454727	0.405858	38.3222	38.3731	36.5019	40.2443
RLPDAHSDYAR	3	11	14765	28.2786	NA	NA	0.223248	0.214926	27.8209	27.8851	26.0137	29.7564
RLPEAIEEVK	2	10	14767	41.5663	NA	NA	0.464842	0.463924	41.5158	41.5627	39.6915	43.4339
RLPENLYNDR	2	10	14768	38.9746	NA	NA	0.41772	0.431639	39.7401	39.7892	37.918	41.6605
RLPPQQIEK	2	9	14769	28.1393	NA	NA	0.220714	0.250228	29.7625	29.8242	27.9529	31.6956
RLQELDAASK	2	10	14770	29.503	NA	NA	0.245509	0.219226	28.0574	28.1213	26.2499	29.9926
RLQQQQRPEDAEDGAEGGGK	3	20	14771	26.5478	NA	NA	0.191779	0.193521	26.6437	26.7093	24.8379	28.5807
RLQSIGTENTEENRR	3	15	14773	27.6431	NA	NA	0.211692	0.207152	27.3933	27.458	25.5867	29.3294
RLTVNEAVK	2	9	14775	28.9046	NA	NA	0.234629	0.225889	28.4239	28.4873	26.616	30.3587
RLVEVDSSR	2	9	14776	28.3852	NA	NA	0.225185	0.229488	28.6218	28.685	26.8136	30.5563
RMATEVAADALGEEWK	3	16	14777	59.1582	NA	NA	0.784694	0.8051	60.2805	60.3037	58.4324	62.1749
RMEELHNQEMQK	2	12	14778	27.0497	NA	NA	0.200903	0.196966	26.8331	26.8985	25.0272	28.7699
RMEELHNQEMQK	3	12	14779	27.0497	NA	NA	0.200903	0.196966	26.8331	26.8985	25.0272	28.7699
RMVVPAALK	2	9	14780	37.7778	NA	NA	0.395959	0.397371	37.8554	37.9069	36.0357	39.7781
RNPDTQWITK	2	10	14783	36.4982	NA	NA	0.372694	0.374931	36.6212	36.6742	34.803	38.5455
RNQSFCPTVNLDK	2	13	14784	42.4642	Carbamidomethyl@C	6	0.481167	0.470244	41.8634	41.9099	40.0387	43.7811
RPAEDMEEEQAFK	2	13	14785	38.0702	NA	NA	0.401276	0.419148	39.0531	39.1031	37.2319	40.9744
RPAEDMEEEQAFK	3	13	14786	38.0702	NA	NA	0.401276	0.419148	39.0531	39.1031	37.2319	40.9744
RPAEDMEEEQAFK	2	13	14787	32.3511	Oxidation@M	6	0.297292	0.293977	32.1688	32.2274	30.3561	34.0987
RPASVSSSAAVEHEQR	3	16	14788	25.5868	NA	NA	0.174306	0.176117	25.6865	25.7533	23.8819	27.6247
RPCFSALTPDETYVPK	2	16	14789	55.4164	Carbamidomethyl@C	3	0.716663	0.699639	54.4802	54.5107	52.6395	56.3819
RPCFSALTPDETYVPK	3	16	14790	55.4164	Carbamidomethyl@C	3	0.716663	0.699639	54.4802	54.5107	52.6395	56.3819
RPDQQLQGEGK	2	11	14792	24.9228	NA	NA	0.162232	0.140502	23.7276	23.797	21.9255	25.6684
RPELEDSTLR	2	10	14794	34.6659	NA	NA	0.339381	0.345672	35.0119	35.067	33.1958	36.9383
RPETVATQFK	2	10	14796	31.0101	NA	NA	0.272911	0.277029	31.2366	31.2964	29.4251	33.1677
RPGAALDPGCVLAK	2	14	14797	45.3409	Carbamidomethyl@C	10	0.533472	0.525794	44.9187	44.9612	43.09	46.8324
RPGEEGTVMSLAGK	2	14	14798	41.99	NA	NA	0.472545	0.455734	41.0654	41.1128	39.2416	42.984
RPGVTGENSNEVAK	2	14	14800	25.7608	NA	NA	0.177469	0.173193	25.5256	25.5927	23.7213	27.4641
RPGVTGENSNEVAK	3	14	14801	25.7608	NA	NA	0.177469	0.173193	25.5256	25.5927	23.7213	27.4641
RPGYGAYDAFK	2	11	14802	40.6284	NA	NA	0.44779	0.442752	40.3514	40.3997	38.5285	42.2709
RPHDYQPLPGMSENPSVYVPGVVSTVVPDSAHK	5	33	14803	68.1882	NA	NA	0.948877	0.949791	68.2385	68.2517	66.3804	70.123
RPISADSAIMNPASK	2	15	14804	40.9308	NA	NA	0.453287	0.47001	41.8505	41.897	40.0258	43.7682
RPLEDGDQPDAK	2	12	14806	26.2378	NA	NA	0.186141	0.188514	26.3683	26.4342	24.5629	28.3056
RPLEDGDQPDAK	3	12	14807	26.2378	NA	NA	0.186141	0.188514	26.3683	26.4342	24.5629	28.3056
RPLEMEQQQAYRPEMK	3	16	14808	40.156	NA	NA	0.4392	0.446182	40.54	40.5881	38.7169	42.4593
RPLEQQQPHHIPTSAPVYQQPQQQPVAQSYGGYK	4	34	14809	47.2629	NA	NA	0.568416	0.569374	47.3156	47.3551	45.4839	49.2263
RPLFLAPDFDR	2	11	14810	59.4199	NA	NA	0.789453	0.774861	58.6174	58.6426	56.7714	60.5139
RPLFLAPDFDR	3	11	14811	59.45	NA	NA	0.79	0.774861	58.6174	58.6426	56.7714	60.5139
RPLRPQVVTDDDGQAPEAK	3	19	14813	35.3231	NA	NA	0.35133	0.355698	35.5634	35.6178	33.7465	37.489
RPNKPAELIAK	3	11	14814	27.2075	NA	NA	0.203773	0.194414	26.6928	26.7584	24.887	28.6298
RPPEPTTPWQEDPEPEDENLYEK	3	23	14815	57.5828	NA	NA	0.756052	0.753195	57.4257	57.4525	55.5813	59.3237
RPPINVAIDR	2	10	14816	39.4681	NA	NA	0.426692	0.430397	39.6718	39.721	37.8498	41.5922
RPQPYPYPSK	2	10	14817	31.2093	NA	NA	0.276534	0.287325	31.8029	31.862	29.9907	33.7333
RPQYSNPPVQGEVMEGADNQGAGEQGR	3	27	14818	45.2091	NA	NA	0.531075	0.533905	45.3648	45.4068	43.5356	47.278
RPQYSNPPVQGEVMEGADNQGAGEQGRPVR	3	30	14819	44.121	NA	NA	0.511291	0.510771	44.0924	44.136	42.2649	46.0072
RPQYSNPPVQGEVMEGADNQGAGEQGRPVR	4	30	14820	44.121	NA	NA	0.511291	0.510771	44.0924	44.136	42.2649	46.0072
RPQYSNPPVQGEVMEGADNQGAGEQGR	3	27	14821	40.71	Oxidation@M	14	0.449273	0.449136	40.7025	40.7504	38.8791	42.6216
RPQYSNPPVQGEVMEGADNQGAGEQGRPVR	4	30	14822	40.352	Oxidation@M	14	0.442764	0.443981	40.4189	40.4672	38.596	42.3384
RPSAPVDFSK	2	10	14823	34.4127	NA	NA	0.334777	0.302412	32.6326	32.6907	30.8194	34.562
RPSENLGQVLFGER	2	14	14824	57.4064	NA	NA	0.752844	0.752534	57.3893	57.4162	55.545	59.2874
RPSPDEPMTNLELK	2	14	14825	47.4491	NA	NA	0.571802	0.598427	48.9135	48.951	47.0798	50.8222
RPSTSQTVSTPAPVPVIESTEAIEAK	3	26	14826	59.2122	NA	NA	0.785677	0.785015	59.1758	59.2004	57.3292	61.0716
RPTDYFAEMAK	2	11	14827	49.4311	NA	NA	0.607838	0.599875	48.9931	49.0306	47.1594	50.9018
RPTEICADPQFIIGGATR	2	18	14828	58.8752	Carbamidomethyl@C	6	0.779549	0.791215	59.5168	59.541	57.6698	61.4122
RPTEICADPQFIIGGATR	3	18	14829	58.9035	Carbamidomethyl@C	6	0.780063	0.791215	59.5168	59.541	57.6698	61.4122
RPTELLSNPQFIVDGATR	2	18	14830	61.6966	NA	NA	0.830847	0.846888	62.5789	62.5991	60.7279	64.4704
RPTPQDSPIFLPVDDTSFR	3	19	14832	67.4451	NA	NA	0.935366	0.93973	67.6851	67.699	65.8277	69.5703
RPVDSYDIPK	2	10	14833	36.7656	NA	NA	0.377557	0.392102	37.5656	37.6175	35.7462	39.4887
RPWITGDESIVGLMK	2	15	14834	67.4135	NA	NA	0.934791	0.922599	66.7429	66.758	64.8867	68.6293
RPWITGDESIVGLMK	3	15	14835	67.4135	NA	NA	0.934791	0.922599	66.7429	66.758	64.8867	68.6293
RQAEVELASR	2	10	14836	28.5053	NA	NA	0.227368	0.239599	29.1779	29.2404	27.369	31.1117
RQAVDVSPLR	2	10	14837	35.7113	NA	NA	0.358388	0.36134	35.8737	35.9277	34.0565	37.799
RQDEDYDEQVEESLQDEDDNDVYILTK	3	27	14838	71.8691	NA	NA	1.0158	1.01615	71.8884	71.8969	70.0256	73.7683
RQEALPLHQETK	3	12	14839	28.0806	NA	NA	0.219648	0.211785	27.6482	27.7125	25.8412	29.5839
RQIIVEEAK	2	9	14840	28.9046	NA	NA	0.234629	0.232867	28.8077	28.8706	26.9992	30.7419
RQLETLGQEK	2	10	14842	28.68	NA	NA	0.230546	0.223834	28.3109	28.3744	26.503	30.2457
RQPQEEVVHEDQGK	3	14	14843	25.6916	NA	NA	0.176211	0.16186	24.9023	24.9701	23.0987	26.8416
RQQEQQVPILEK	2	12	14844	38.1526	NA	NA	0.402774	0.39739	37.8565	37.9079	36.0367	39.7792
RQQEVETELK	2	10	14845	27.9649	NA	NA	0.217543	0.218951	28.0423	28.1062	26.2348	29.9775
RREEEGIQLR	3	10	14846	27.936	NA	NA	0.217018	0.217572	27.9665	28.0304	26.1591	29.9018
RRPGPGPGVPPK	3	12	14847	23.602	NA	NA	0.138219	0.130602	23.1831	23.2531	21.3817	25.1246
RSAEEEAADLPTKPTK	3	16	14848	34.2423	NA	NA	0.331678	0.311149	33.1132	33.1707	31.2994	35.042
RSEAEEAITSFNGHKPPGSSEPITVK	4	26	14851	49.2944	NA	NA	0.605352	0.604698	49.2584	49.2955	47.4243	51.1667
RSPPIPLAK	2	9	14852	34.0157	NA	NA	0.327557	0.318164	33.499	33.556	31.6848	35.4273
RSTITSR	2	7	14853	18.1653	NA	NA	0.0393685	0.0921043	21.0657	21.1384	19.2669	23.0099
RSTVAQLVK	2	9	14854	29.2773	NA	NA	0.241405	0.239525	29.1739	29.2363	27.365	31.1077
RTAQEVETYR	2	10	14855	27.6681	NA	NA	0.212148	0.205111	27.2811	27.3459	25.4746	29.2173
RTDIFGVEETAIGK	2	14	14857	57.0601	NA	NA	0.746547	0.755654	57.561	57.5876	55.7164	59.4588
RTDLCDHALHISHDEL	4	16	14858	45.2091	Carbamidomethyl@C	5	0.531075	0.53732	45.5526	45.5944	43.7232	47.4656
RTEITIVK	2	8	14859	31.2093	NA	NA	0.276534	0.278844	31.3364	31.3961	29.5248	33.2674
RTEMENEFVLIK	3	12	14861	55.2537	NA	NA	0.713704	0.715531	55.3542	55.3836	53.5124	57.2548
RTIAQDYGVLK	2	11	14863	43.3822	NA	NA	0.497859	0.506901	43.8796	43.9235	42.0523	45.7946
RTPAYIPIR	2	9	14865	39.2279	NA	NA	0.422325	0.44284	40.3562	40.4045	38.5333	42.2757
RTTVVAQLK	2	9	14866	28.68	NA	NA	0.230546	0.201051	27.0578	27.1229	25.2516	28.9943
RTVDLSSHLAK	3	11	14867	31.2093	NA	NA	0.276534	0.271382	30.926	30.9863	29.115	32.8576
RVATPVDWK	2	9	14868	37.8581	NA	NA	0.39742	0.390572	37.4814	37.5334	35.6622	39.4046
RVCEEIAIIPSK	2	12	14869	46.7047	Carbamidomethyl@C	3	0.558267	0.568848	47.2866	47.3262	45.455	49.1974
RVCEEIAIIPSK	3	12	14870	46.7047	Carbamidomethyl@C	3	0.558267	0.568848	47.2866	47.3262	45.455	49.1974
RVEDVLGK	2	8	14873	30.8604	NA	NA	0.270189	0.264631	30.5547	30.6154	28.7441	32.4867
RVEILNEHR	3	9	14874	28.1704	NA	NA	0.22128	0.227835	28.5309	28.5942	26.7228	30.4655
RVHPVSTMIK	2	10	14876	27.7562	NA	NA	0.213749	0.198436	26.914	26.9793	25.1079	28.8506
RVHPVSTMIK	3	10	14877	27.728	NA	NA	0.213236	0.198436	26.914	26.9793	25.1079	28.8506
RVIDYAVK	2	8	14878	32.982	NA	NA	0.308764	0.300323	32.5178	32.576	30.7047	34.4473
RVLPPNWK	2	8	14879	36.5813	NA	NA	0.374206	0.355375	35.5456	35.6	33.7288	37.4713
RVPPPALSR	2	9	14880	28.1704	NA	NA	0.22128	0.242105	29.3158	29.378	27.5067	31.2494
RYDDPEVQK	2	9	14881	26.5142	NA	NA	0.191168	0.184015	26.1208	26.1871	24.3157	28.0585
