# Supplementary material for: Implementing N-terminomics and machine learning to probe in vivo Nt-arginylation
Source: bioRxiv preprint, doi:10.1101/2025.04.09.646507, version 1 (2025-04-09)
Supplement: Supplementary Data 9 [file 646507_file13.xlsx]

## Sheet: summary_prm_data
mz	irt_pred	Comment	lwr	upr	mz_upr	mz_lwr	precursormz	spectrum	charge	nce	rt	tic	rt_start	rt_end	gene_position	sequence	charge_inclusionlist	mod_sites	mods	index	nAA	sequence_mod	spec_matched_nrow	frag_start_idx	frag_stop_idx	PCC	COS	SA	SPC	PCC_pretrained	COS_pretrained	SA_pretrained	SPC_pretrained	rt_min	rt_expect	rt_observe_expect	file_num	treathour	treatment
836.415	69.2789	SQSTM1|421_NYDIGAALDTIQYSK_2	64.28	74.28	836.416	836.414	836.415	11531	2	27	4193.65	5021938	67.4854	73.4615	SQSTM1|421	NYDIGAALDTIQYSK	2	NA	NA	71	15	NYDIGAALDTIQYSK	18	113536	113550	0.987691	0.989475	0.907554	0.82512	0.984053	0.986354	0.894709	0.813978	69.8941	69.28	0.614098	1	0	MOCK
745.392	59.9233	PRTC11_SFANQPLEVVYSK_2	54.92	64.92	745.393	745.391	745.392	9199	2	27	3546.78	30828184	58.1555	64.1159	PRTC11	SFANQPLEVVYSK	2	13	Label:13C(6)15N(2)@K	45	13	SFANQPLEVVYSk	15	54312	54324	0.987354	0.989223	0.906451	0.915545	0.961679	0.967451	0.837127	0.786854	59.113	59.92	-0.807046	1	0	MOCK
773.895	53.205	PRTC08_ELGQSGVDTYLQTK_2	48.21	58.21	773.896	773.894	773.895	7782	2	27	3169.11	1.5284e+06	51.4392	57.4008	PRTC08	ELGQSGVDTYLQTK	2	14	Label:13C(6)15N(2)@K	56	14	ELGQSGVDTYLQTk	13	74303	74316	0.986075	0.988385	0.902876	0.92948	0.90861	0.924382	0.750836	0.852514	52.8184	53.21	-0.391581	1	0	MOCK
787.421	72.8278	PRTC15_LSSEAPALFQFDLK_2	67.83	77.83	787.422	787.42	787.421	12263	2	27	4384.42	5830380	71.0769	77.0639	PRTC15	LSSEAPALFQFDLK	2	14	Label:13C(6)15N(2)@K	63	14	LSSEAPALFQFDLk	9	88317	88330	0.96527	0.966398	0.834499	0.335055	0.936985	0.937681	0.774063	0.396696	73.0737	72.83	0.243701	1	0	MOCK
451.283	34.9206	PRTC04_DIPVPKPK_2	29.92	39.92	451.284	451.282	451.283	4034	2	27	2195.28	440747	33.048	39.0277	PRTC04	DIPVPKPK	2	8	Label:13C(6)15N(2)@K	2	8	DIPVPKPk	4	1559	1566	0.95506	0.960137	0.819642	0.391626	0.93913	0.946797	0.791403	0.392173	36.5881	34.92	1.66805	1	0	MOCK
415.74	33.151	MTHFD2|36_EAVVISGR_2	28.15	38.15	415.741	415.739	415.74	2912	2	27	1907.69	1.82505e+06	31.2834	37.224	MTHFD2|36	EAVVISGR	2	NA	NA	4	8	EAVVISGR	5	3407	3414	0.950506	0.956698	0.81197	0.500274	0.949845	0.956226	0.810941	0.500274	31.7949	33.15	-1.35515	1	0	MOCK
682.849	48.3756	SSBP1|17_ESETTTSLVLER_2	43.38	53.38	682.85	682.848	682.849	6530	2	27	2839.52	1.40334e+06	46.5865	52.571	SSBP1|17	ESETTTSLVLER	2	NA	NA	34	12	ESETTTSLVLER	13	38849	38860	0.949973	0.958464	0.815871	0.679352	0.943377	0.953259	0.804589	0.679352	47.3253	48.38	-1.05471	1	0	MOCK
761.381	51.6026	P4HB|18_DAPEEEDHVLVLR_2	46.6	56.6	761.382	761.38	761.381	7169	2	27	3009.27	1528196	49.7351	55.6876	P4HB|18	DAPEEEDHVLVLR	2	NA	NA	51	13	DAPEEEDHVLVLR	23	62916	62928	0.949812	0.952308	0.802595	0.422492	0.891819	0.911814	0.730636	0.693715	50.1545	51.6	-1.44551	1	0	MOCK
587.269	26.2323	TNFRSF12A|28_EQAPGTAPCSR_2	21.23	31.23	587.27	587.269	587.269	1464	2	27	1538.7	221375	24.5203	30.5136	TNFRSF12A|28	EQAPGTAPCSR	2	9	Carbamidomethyl@C	28	11	EQAPGTAPCSR	8	30272	30282	0.946829	0.952144	0.802253	0.745966	0.972035	0.974877	0.856997	0.670732	25.645	26.23	-0.585031	1	0	MOCK
680.374	71.767	PRTC14_ELASGLSFPVGFK_2	66.77	76.77	680.375	680.372	680.373	12166	2	27	4358.13	419052	69.9169	75.8999	PRTC14	ELASGLSFPVGFK	2	13	Label:13C(6)15N(2)@K	48	13	ELASGLSFPVGFk	11	59184	59196	0.934377	0.943893	0.785733	0.787071	0.83902	0.863267	0.663172	0.848404	72.6355	71.77	0.865453	1	0	MOCK
801.411	60.0386	PRTC10_GILFVGSGVSGGEEGAR_2	55.04	65.04	801.412	801.41	801.411	9690	2	27	3676.75	293556	58.3303	64.299	PRTC10	GILFVGSGVSGGEEGAR	2	17	Label:13C(6)15N(4)@R	79	17	GILFVGSGVSGGEEGAr	11	134851	134867	0.924496	0.931143	0.762374	0.735073	0.614878	0.653354	0.453277	0.487157	61.2791	60.04	1.23909	1	0	MOCK
498.802	63.8572	PRTC12_LTILEELR_2	58.86	68.86	498.803	498.801	498.802	10456	2	27	3890.37	69756.6	61.9319	67.8873	PRTC12	LTILEELR	2	8	Label:13C(6)15N(4)@R	7	8	LTILEELr	6	6697	6704	0.922706	0.932862	0.765393	0.55665	0.580441	0.643452	0.444997	0.148604	64.8394	63.86	0.97945	1	0	MOCK
758.338	44.9663	FBLN1|30_DVLLEACCADGHR_2	39.97	49.97	758.339	758.337	758.338	5670	2	27	2619.19	764928	43.0848	49.0475	FBLN1|30	DVLLEACCADGHR	2	7;8	Carbamidomethyl@C;Carbamidomethyl@C	53	13	DVLLEACCADGHR	5	68100	68112	0.905612	0.908185	0.725064	-0.0226336	0.90665	0.912204	0.731242	-0.013515	43.6532	44.97	-1.31681	1	0	MOCK
573.302	67.5684	PRTC13_NGFILDGFPR_2	62.57	72.57	573.303	573.301	573.302	10755	2	27	3982.05	143794	65.8401	71.8306	PRTC13	NGFILDGFPR	2	10	Label:13C(6)15N(4)@R	20	10	NGFILDGFPr	4	20996	21005	0.881442	0.893426	0.703411	0.635006	0.605436	0.633514	0.436776	0.626255	66.3675	67.57	-1.20252	1	0	MOCK
496.287	29.929	PRTC03_HVLTSIGEK_2	24.93	34.93	496.288	496.286	496.287	3185	2	27	1979.22	984767	27.9512	33.9042	PRTC03	HVLTSIGEK	2	9	Label:13C(6)15N(2)@K	13	9	HVLTSIGEk	4	11922	11930	0.880177	0.889681	0.698147	0.459677	0.916442	0.923811	0.749887	0.140396	32.987	29.93	3.05697	1	0	MOCK
760.356	53.4877	BAX|66_IGDELDSNMELQR_2	48.49	58.49	760.357	760.356	760.356	7883	2	27	3195.34	258853	51.6791	57.6187	BAX|66	IGDELDSNMELQR	2	NA	NA	44	13	IGDELDSNMELQR	5	52188	52200	0.833471	0.842927	0.638339	0.100087	0.823447	0.83402	0.627933	0.0952019	53.2557	53.49	-0.234337	1	0	MOCK
471.236	24.3151	ERO1A|24_REEQPPETAAQR_3	19.32	29.32	471.237	471.235	471.236	1169	3	27	1458.28	99064.7	22.814	28.8086	ERO1A|24	REEQPPETAAQR	3	NA	NA	37	12	REEQPPETAAQR	1	41533	41544	0.828194	0.81346	0.604838	-0.314658	0.827076	0.814501	0.605978	-0.366032	24.3047	24.32	-0.015256	1	0	MOCK
867.881	58.2026	HSP90B1|22_DDEVDVDGTVEEDLGK_2	53.2	63.2	867.882	867.88	867.881	8630	2	27	3395.95	516001	56.348	62.3295	HSP90B1|22	DDEVDVDGTVEEDLGK	2	NA	NA	74	16	DDEVDVDGTVEEDLGK	1	122580	122595	0.81172	0.812577	0.603872	0.564046	0.660557	0.651383	0.451622	-0.19222	56.5991	58.2	-1.60088	1	0	MOCK
493.768	26.3416	PRTC01_SSAAPPPPPR_2	21.34	31.34	493.769	493.767	493.768	2268	2	27	1745.74	888612	24.4129	30.3727	PRTC01	SSAAPPPPPR	2	10	Label:13C(6)15N(4)@R	18	10	SSAAPPPPPr	8	18683	18692	0.805741	0.839012	0.633733	0.458945	0.735215	0.778523	0.568062	0.560103	29.0957	26.34	2.75567	1	0	MOCK
761.368	41.0085	FLNA|1502_NADGTQTVNYVPSR_2	36.01	46.01	761.369	761.367	761.368	4930	2	27	2430.75	138120	39.3308	45.3231	FLNA|1502	NADGTQTVNYVPSR	2	NA	NA	60	14	NADGTQTVNYVPSR	1	81427	81440	0.804091	0.786857	0.576586	-0.248186	0.799862	0.783407	0.57304	-0.195893	40.5125	41.01	-0.49749	1	0	MOCK
558.326	56.6711	PRTC09_GLILVGGYGTR_2	51.67	61.67	558.327	558.325	558.326	9534	2	27	3635.05	249366	55.0222	60.9745	PRTC09	GLILVGGYGTR	2	11	Label:13C(6)15N(4)@R	29	11	GLILVGGYGTr	3	33482	33492	0.789799	0.806164	0.59692	0.640994	0.668526	0.694091	0.488387	0.352251	60.5842	56.67	3.91419	1	0	MOCK
695.832	45.6162	PRTC06_TASEFDSAIAQDK_2	40.62	50.62	695.833	695.831	695.832	5901	2	27	2678.45	8.0597e+06	43.6932	49.6577	PRTC06	TASEFDSAIAQDK	2	13	Label:13C(6)15N(2)@K	43	13	TASEFDSAIAQDk	14	49896	49908	0.786701	0.827234	0.620174	0.472699	0.876026	0.897008	0.708528	0.450174	44.6408	45.62	-0.979199	1	0	MOCK
507.602	41.2944	SSBP1|17_RESETTTSLVLER_3	36.29	46.29	507.603	507.601	507.602	5946	3	27	2690.11	232542	39.3586	45.3114	SSBP1|17	RESETTTSLVLER	3	NA	NA	49	13	RESETTTSLVLER	2	62616	62628	0.782893	0.777201	0.566722	-0.239687	0.756981	0.755911	0.545612	-0.190838	44.8352	41.29	3.54523	1	0	MOCK
570.276	58.136	PDIA3|26_RDVLELTDDNFESR_3	53.14	63.14	570.277	570.275	570.276	9065	3	27	3513.42	957883	56.286	62.2614	PDIA3|26	RDVLELTDDNFESR	3	NA	NA	65	14	RDVLELTDDNFESR	1	94635	94648	0.775623	0.755985	0.545684	-0.248186	0.777842	0.757788	0.54744	-0.344019	58.5569	58.14	0.416937	1	0	MOCK
628.299	27.7828	ERO1A|24_EEQPPETAAQR_2	22.78	32.78	628.3	628.298	628.299	1959	2	27	1667.03	117672	26.0554	32.0231	ERO1A|24	EEQPPETAAQR	2	NA	NA	22	11	EEQPPETAAQR	1	23362	23372	0.771394	0.770736	0.560223	-0.0605066	0.3369	0.367062	0.239273	-0.217073	27.7839	27.78	0.003851	1	0	MOCK
427.226	43.2527	CALR|18_EPAVYFK_2	38.25	48.25	427.227	427.225	427.226	5213	2	27	2503.83	855905	41.7305	47.7017	CALR|18	EPAVYFK	2	NA	NA	1	7	EPAVYFK	5	0	6	0.770426	0.807155	0.597988	0.766957	0.782209	0.816421	0.60809	0.786087	41.7305	43.25	-1.51949	1	0	MOCK
613.317	30.6463	PRTC02_GISNEGQNASIK_2	25.65	35.65	613.318	613.316	613.317	2560	2	27	1816.61	1.20486e+06	28.846	34.814	PRTC02	GISNEGQNASIK	2	12	Label:13C(6)15N(2)@K	40	12	GISNEGQNASIk	12	45559	45570	0.746628	0.789447	0.579265	0.559549	0.549059	0.606844	0.41513	0.294221	30.2768	30.65	-0.373236	1	0	MOCK
422.736	38.5693	PRTC05_IGDYAGIK_2	33.57	43.57	422.737	422.735	422.736	4306	2	27	2266.14	1.12251e+06	36.7801	42.7241	PRTC05	IGDYAGIK	2	8	Label:13C(6)15N(2)@K	6	8	IGDYAGIk	8	4751	4758	0.744592	0.78215	0.571754	0.6341	0.189796	0.325405	0.211001	0.411877	37.769	38.57	-0.800991	1	0	MOCK
818.891	39.83	ENG|26_ETVHCDLQPVGPER_2	34.83	44.83	818.892	818.89	818.891	4572	2	27	2332.96	56418.1	38.2395	44.1863	ENG|26	ETVHCDLQPVGPER	2	5	Carbamidomethyl@C	58	14	ETVHCDLQPVGPER	3	79165	79178	0.734746	0.745736	0.535804	-0.14343	0.82275	0.821765	0.614021	-0.14326	38.8827	39.83	-0.947337	1	0	MOCK
752.854	54.3255	HSP90B1|24_EVDVDGTVEEDLGK_2	49.33	59.33	752.855	752.853	752.854	8740	2	27	3425.6	3.01469e+06	52.5124	58.4894	HSP90B1|24	EVDVDGTVEEDLGK	2	NA	NA	57	14	EVDVDGTVEEDLGK	3	78281	78294	0.708073	0.724313	0.515686	0.171732	0.627869	0.651212	0.451478	0.0389311	57.0933	54.33	2.7633	1	0	MOCK
586.8	46.4127	PRTC07_SAAGAFGPELSR_2	41.41	51.41	586.801	586.799	586.8	6415	2	27	2810.27	686968	44.7302	50.6969	PRTC07	SAAGAFGPELSR	2	12	Label:13C(6)15N(4)@R	32	12	SAAGAFGPELSr	10	34174	34185	0.691522	0.734297	0.524976	0.563284	0.34583	0.42812	0.281648	0.492107	46.8378	46.41	0.427783	1	0	MOCK
554.272	47.8065	HSP90B1|24_REVDVDGTVEEDLGK_3	42.81	52.81	554.273	554.271	554.272	7254	3	27	3031.3	1.47725e+06	45.9575	51.9217	HSP90B1|24	REVDVDGTVEEDLGK	3	NA	NA	68	15	REVDVDGTVEEDLGK	3	106746	106760	0.667474	0.668205	0.465874	-0.0873548	0.644221	0.64551	0.44671	-0.24337	50.5216	47.81	2.71164	1	0	MOCK
598.297	34.4875	ENG|26_RETVHCDLQPVGPER_3	29.49	39.49	598.298	598.296	598.297	3166	3	27	1974.28	1121665	32.9047	38.8905	ENG|26	RETVHCDLQPVGPER	3	6	Carbamidomethyl@C	69	15	RETVHCDLQPVGPER	2	107362	107376	0.638393	0.651388	0.451626	-0.280314	0.765178	0.766206	0.555716	-0.334587	32.9047	34.49	-1.5853	1	0	MOCK
594.299	39.5989	FKBP11|26_EAGLETESPVR_2	34.6	44.6	594.3	594.298	594.299	5378	2	27	2544.66	479517	37.7729	43.7397	FKBP11|26	EAGLETESPVR	2	NA	NA	26	11	EAGLETESPVR	2	27382	27392	0.608298	0.620767	0.426357	0.0321763	0.609948	0.62274	0.427961	0.0321763	42.411	39.6	2.81101	1	0	MOCK
584.304	60.3621	P4HA3|29_DTFSALTSVAR_2	55.36	65.36	584.305	584.303	584.304	9783	2	27	3701.53	665862	58.6125	64.5893	P4HA3|29	DTFSALTSVAR	2	NA	NA	27	11	DTFSALTSVAR	2	28592	28602	0.605905	0.622688	0.427919	-0.0199813	0.600341	0.618115	0.424207	-0.0883678	61.6922	60.36	1.33222	1	0	MOCK
337.187	35.4809	CALR|18_REPAVYFK_3	30.48	40.48	337.188	337.186	337.187	3306	3	27	2009.34	466187	33.2033	39.1668	CALR|18	REPAVYFK	3	NA	NA	3	8	REPAVYFK	1	2119	2126	0.576975	0.58882	0.400815	-0.35769	0.511381	0.532973	0.357851	-0.134647	33.489	35.48	-1.991	1	0	MOCK
681.355	58.8019	LSM3|7_REQQTTNTVEEPLDLIR_3	53.8	63.8	681.356	681.354	681.355	9538	3	27	3635.99	4701752	56.7927	62.774	LSM3|7	REQQTTNTVEEPLDLIR	3	NA	NA	78	17	REQQTTNTVEEPLDLIR	2	132355	132371	0.564697	0.573645	0.388942	-0.483631	0.561571	0.571904	0.38759	-0.447001	60.5998	58.8	1.79983	1	0	MOCK
329.53	27.6908	MTHFD2|36_REAVVISGR_3	22.69	32.69	329.531	329.529	329.53	1792	3	27	1625.18	294193	25.4754	31.4624	MTHFD2|36	REAVVISGR	3	NA	NA	10	9	REAVVISGR	1	8306	8314	0.550791	0.564065	0.381527	-0.218292	0.543374	0.557813	0.376719	-0.137463	27.0863	27.69	-0.603749	1	0	MOCK
607.616	43.539	TMEM59|36_REAFDSVLGDTASCHR_3	38.54	48.54	607.617	607.615	607.616	5786	3	27	2648.85	182270	41.4376	47.4207	TMEM59|36	REAFDSVLGDTASCHR	3	14	Carbamidomethyl@C	75	16	REAFDSVLGDTASCHR	1	126195	126210	0.539677	0.538925	0.362339	-0.439817	0.532765	0.534776	0.359208	-0.403807	44.1475	43.54	0.60748	1	0	MOCK
776.86	67.1829	PDIA3|26_DVLELTDDNFESR_2	62.18	72.18	776.861	776.859	776.86	10851	2	27	4008.6	692810	65.4541	71.4206	PDIA3|26	DVLELTDDNFESR	2	NA	NA	52	13	DVLELTDDNFESR	2	65904	65916	0.501199	0.530692	0.356136	0.0186713	0.510443	0.538581	0.362079	-0.103181	66.81	67.18	-0.370041	1	0	MOCK
467.733	29.7107	CENPU|49_NSDVSSIGR_2	24.71	34.71	467.734	467.732	467.733	2615	2	27	1830.11	590770	27.8069	33.7848	CENPU|49	NSDVSSIGR	2	NA	NA	11	9	NSDVSSIGR	1	9898	9906	0.481867	0.502422	0.335116	-0.218292	0.446961	0.471708	0.312724	-0.291606	30.5019	29.71	0.791852	1	0	MOCK
764.835	69.703	ATF4|76_EDAFSGTDWMLEK_2	64.7	74.7	764.836	764.834	764.835	11613	2	27	4214.12	430037	68.0596	74.0334	ATF4|76	EDAFSGTDWMLEK	2	NA	NA	42	13	EDAFSGTDWMLEK	2	48072	48084	0.448748	0.472261	0.313124	-0.00629616	0.45865	0.480515	0.3191	-0.00629616	70.2353	69.7	0.535273	1	0	MOCK
443.882	22.4798	TNFRSF12A|28_REQAPGTAPCSR_3	17.48	27.48	443.884	443.882	443.883	1528	3	27	1556	1.86842e+06	21.1891	27.1785	TNFRSF12A|28	REQAPGTAPCSR	3	10	Carbamidomethyl@C	33	12	REQAPGTAPCSR	1	38255	38266	0.447592	0.466449	0.308934	-0.320719	0.473567	0.489701	0.325788	-0.320719	25.9333	22.48	3.45332	1	0	MOCK
448.569	33.1905	FKBP11|26_REAGLETESPVR_3	28.19	38.19	448.57	448.568	448.569	2745	3	27	1864.36	284735	31.0726	37.0167	FKBP11|26	REAGLETESPVR	3	NA	NA	39	12	REAGLETESPVR	1	43172	43183	0.443543	0.459708	0.304092	-0.320719	0.413986	0.434097	0.285865	-0.326779	31.0726	33.19	-2.11738	1	0	MOCK
605.827	72.7819	BCL2|130_FATVVEELFR_2	67.78	77.78	605.828	605.826	605.827	11782	2	27	4259.21	4088537	70.8819	76.8608	BCL2|130	FATVVEELFR	2	NA	NA	16	10	FATVVEELFR	1	14930	14939	0.371617	0.402204	0.263512	-0.281853	0.330131	0.365673	0.238323	-0.22278	70.9868	72.78	-1.79323	1	0	MOCK
557.928	36.8535	FBLN1|30_RDVLLEACCADGHR_3	31.85	41.85	557.929	557.927	557.928	4023	3	27	2192.27	1.2293e+06	34.8875	40.8595	FBLN1|30	RDVLLEACCADGHR	3	8;9	Carbamidomethyl@C;Carbamidomethyl@C	64	14	RDVLLEACCADGHR	1	91944	91957	0.340898	0.361777	0.23566	-0.516136	0.373045	0.390944	0.255703	-0.507428	36.5379	36.85	-0.312114	1	0	MOCK
630.957	51.6242	HSP90B1|22_RDDEVDVDGTVEEDLGK_3	46.62	56.62	630.958	630.956	630.957	7129	3	27	2998.37	2.35647e+06	49.8799	55.8667	HSP90B1|22	RDDEVDVDGTVEEDLGK	3	NA	NA	77	17	RDDEVDVDGTVEEDLGK	1	127443	127459	0.285314	0.308985	0.199979	-0.0986723	0.293722	0.317049	0.205384	-0.193475	49.9729	51.62	-1.64712	1	0	MOCK
496.295	48.7357	ERN1|280_LTPTLYVGK_2	43.74	53.74	496.296	496.294	496.295	6779	2	27	2905.29	433174	46.9962	52.9825	ERN1|280	LTPTLYVGK	2	NA	NA	14	9	LTPTLYVGK	2	12442	12450	0.281387	0.349915	0.227579	-0.0976906	0.508774	0.546896	0.368381	-0.00513196	48.4215	48.74	-0.31846	1	0	MOCK
520.925	34.7462	CPSF7|33_RDVLTATSQPSDDR_3	29.75	39.75	520.926	520.924	520.925	3215	3	27	1986.65	1.22076e+06	32.5656	38.5066	CPSF7|33	RDVLTATSQPSDDR	3	NA	NA	61	14	RDVLTATSQPSDDR	1	83143	83156	0.257801	0.288584	0.186369	-0.348374	0.289306	0.317235	0.205509	-0.301887	33.1109	34.75	-1.63913	1	0	MOCK
590.614	17.8991	SHMT2|27_REHSNAAQTQTGEANR_3	12.9	22.9	590.615	590.613	590.614	60	3	27	1107.23	18186	18.0351	24.0287	SHMT2|27	REHSNAAQTQTGEANR	3	NA	NA	73	16	REHSNAAQTQTGEANR	1	116115	116130	0.25464	0.282647	0.182425	0.0639066	0.330075	0.349786	0.227491	-0.413643	18.4538	17.9	0.553848	1	0	MOCK
794.019	50.9195	EIF4B|46_RDLEGDVSTTWHSNDDDVYR_3	45.92	55.92	794.02	794.018	794.019	7530	3	27	3104.48	503779	48.8389	54.7944	EIF4B|46	RDLEGDVSTTWHSNDDDVYR	3	NA	NA	83	20	RDLEGDVSTTWHSNDDDVYR	1	138566	138585	0.238875	0.263318	0.169634	-0.154751	0.26558	0.287671	0.185762	-0.267929	51.7413	50.92	0.821345	1	0	MOCK
364.519	25.9378	CENPU|49_RDSDVSSIGR_3	20.94	30.94	364.521	364.519	364.519	1786	3	27	1623.61	436418	23.9386	29.9056	CENPU|49	RDSDVSSIGR	3	NA	NA	19	10	RDSDVSSIGR	1	20024	20033	0.2163	0.259267	0.166962	-0.22278	0.211862	0.254933	0.164107	-0.213771	27.0602	25.94	1.12023	1	0	MOCK
560.276	37.7312	FLNA|1502_RDADGTQTVNYVPSR_3	32.73	42.73	560.277	560.275	560.276	4900	3	27	2423.01	641310	35.8404	41.808	FLNA|1502	RDADGTQTVNYVPSR	3	NA	NA	70	15	RDADGTQTVNYVPSR	1	111702	111716	0.192487	0.22898	0.147078	-0.3838	0.189727	0.225742	0.144961	-0.297642	40.3835	37.73	2.6535	1	0	MOCK
542.269	42.9302	CASP3|29_SGISLDNSYK_2	37.93	47.93	542.27	542.269	542.269	6487	2	27	2828.36	336645	41.2209	47.1877	CASP3|29	SGISLDNSYK	2	NA	NA	15	10	SGISLDNSYK	2	14885	14894	0.170994	0.236044	0.151702	-0.0178893	0.164646	0.230599	0.148137	-0.0268984	47.1394	42.93	4.20938	1	0	MOCK
557.299	44.2714	PLA2R1|21_EGVAAALTPER_2	39.27	49.27	557.3	557.298	557.299	5556	2	27	2589.59	1.46922e+06	42.4507	48.3959	PLA2R1|21	EGVAAALTPER	2	NA	NA	23	11	EGVAAALTPER	1	24742	24752	0.13946	0.195275	0.12512	-0.185272	0.12115	0.179054	0.114607	-0.260976	43.1598	44.27	-1.11017	1	0	MOCK
806.875	19.0125	SHMT2|27_QHSNAAQTQTGEANR_2	14.01	24.01	806.876	806.874	806.875	403	2	27	1222.94	16513.6	18.6145	24.6132	SHMT2|27	QHSNAAQTQTGEANR	2	NA	NA	67	15	QHSNAAQTQTGEANR	1	101020	101034	0.110827	0.13624	0.0870039	0.526316	0.266786	0.296181	0.191426	-0.254614	20.3824	19.01	1.37239	1	0	MOCK
702.834	41.5014	CPSF7|33_DVLTATSQPSDDR_2	36.5	46.5	702.835	702.833	702.834	5989	2	27	2701.32	368993	39.7137	45.7019	CPSF7|33	DVLTATSQPSDDR	2	NA	NA	46	13	DVLTATSQPSDDR	1	57912	57924	0.0684206	0.12287	0.0784196	-0.0504234	0.0548874	0.111019	0.0708226	-0.238765	45.0219	41.5	3.52192	1	0	MOCK
832.87	52.702	TMEM59|36_EAFDSVLGDTASCHR_2	47.7	57.7	832.871	832.869	832.87	7719	2	27	3153.1	4.45394e+06	50.8187	56.7849	TMEM59|36	EAFDSVLGDTASCHR	2	13	Carbamidomethyl@C	66	15	EAFDSVLGDTASCHR	1	96792	96806	0.0603492	0.103684	0.0661262	-0.398838	0.101115	0.140629	0.0898249	-0.305161	52.5517	52.7	-0.148267	1	0	MOCK
559.957	43.3358	P4HB|18_RDAPEEEDHVLVLR_3	38.34	48.34	559.958	559.956	559.957	6232	3	27	2763.9	683521	41.3064	47.2538	P4HB|18	RDAPEEEDHVLVLR	3	NA	NA	55	14	RDAPEEEDHVLVLR	1	73406	73419	0.00649971	0.069614	0.0443536	-0.555323	-0.0410417	0.0227475	0.0144828	-0.541193	46.065	43.34	2.725	1	0	MOCK
576.587	27.2043	IGFBP4|22_RDEAIHCPPCSEEK_3	22.2	32.2	576.588	576.586	576.587	1671	3	27	1593.77	217392	25.1897	31.1846	IGFBP4|22	RDEAIHCPPCSEEK	3	7;10	Carbamidomethyl@C;Carbamidomethyl@C	62	14	RDEAIHCPPCSEEK	1	85743	85756	0.00408855	0.0568157	0.0361896	-0.0683855	0.0421201	0.0916337	0.0584178	-0.291727	26.5628	27.2	-0.637191	1	0	MOCK
786.327	31.4927	IGFBP4|22_DEAIHCPPCSEEK_2	26.49	36.49	786.328	786.326	786.327	2381	2	27	1774.22	217863	29.5704	35.5273	IGFBP4|22	DEAIHCPPCSEEK	2	6;9	Carbamidomethyl@C;Carbamidomethyl@C	54	13	DEAIHCPPCSEEK	0	69828	69840	0	0	0	0.0935193	0	0	0	-0.317846	29.5704	31.49	-1.9196	1	0	MOCK
848.393	68.08	UQCRHL|15_RDPEEEEEEEEELVDPLTTVR_3	63.08	73.08	848.394	848.392	848.393	10798	3	27	3994.43	1.06874e+06	66.5739	72.5639	UQCRHL|15	RDPEEEEEEEEELVDPLTTVR	3	NA	NA	84	21	RDPEEEEEEEEELVDPLTTVR	0	140371	140391	0	0	0	0.238514	0	0	0	-0.429372	66.5739	68.08	-1.50609	1	0	MOCK
745.392	59.9233	PRTC11_SFANQPLEVVYSK_2	54.92	64.92	745.393	745.391	745.392	9126	2	27	3568.45	25044612	58.154	64.1283	PRTC11	SFANQPLEVVYSK	2	13	Label:13C(6)15N(2)@K	45	13	SFANQPLEVVYSk	16	53525	53537	0.987966	0.98981	0.90904	0.859748	0.970031	0.974624	0.856276	0.734965	59.4742	59.92	-0.445803	2	0	MOCK
836.415	69.2789	SQSTM1|421_NYDIGAALDTIQYSK_2	64.28	74.28	836.416	836.414	836.415	11357	2	27	4197.4	12650566	67.4935	73.4487	SQSTM1|421	NYDIGAALDTIQYSK	2	NA	NA	71	15	NYDIGAALDTIQYSK	17	111744	111758	0.986981	0.98889	0.905014	0.874744	0.984303	0.986582	0.895596	0.863397	69.9567	69.28	0.676696	2	0	MOCK
773.895	53.205	PRTC08_ELGQSGVDTYLQTK_2	48.21	58.21	773.896	773.894	773.895	7654	2	27	3171.2	5915734	51.4288	57.4109	PRTC08	ELGQSGVDTYLQTK	2	14	Label:13C(6)15N(2)@K	56	14	ELGQSGVDTYLQTk	16	73130	73143	0.984607	0.98724	0.898192	0.755187	0.912165	0.927652	0.756352	0.795782	52.8533	53.21	-0.356735	2	0	MOCK
761.381	51.6026	P4HB|18_DAPEEEDHVLVLR_2	46.6	56.6	761.382	761.38	761.381	7106	2	27	3024.14	369243	49.7317	55.7019	P4HB|18	DAPEEEDHVLVLR	2	NA	NA	51	13	DAPEEEDHVLVLR	13	61997	62009	0.955537	0.960403	0.820249	0.626737	0.861652	0.877952	0.682181	0.423035	50.4023	51.6	-1.19768	2	0	MOCK
415.74	33.151	MTHFD2|36_EAVVISGR_2	28.15	38.15	415.741	415.739	415.74	2952	2	27	1930.74	516529	31.2711	37.2468	MTHFD2|36	EAVVISGR	2	NA	NA	4	8	EAVVISGR	6	3423	3430	0.953599	0.9609	0.821388	0.64532	0.961053	0.967065	0.83616	0.64532	32.1791	33.15	-0.970942	2	0	MOCK
787.421	72.8278	PRTC15_LSSEAPALFQFDLK_2	67.83	77.83	787.422	787.42	787.421	12061	2	27	4383.7	8566448	71.0676	77.0604	PRTC15	LSSEAPALFQFDLK	2	14	Label:13C(6)15N(2)@K	63	14	LSSEAPALFQFDLk	15	86910	86923	0.953362	0.95552	0.809411	0.049603	0.900348	0.904765	0.719907	0.23094	73.0616	72.83	0.231602	2	0	MOCK
682.849	48.3756	SSBP1|17_ESETTTSLVLER_2	43.38	53.38	682.85	682.848	682.849	6528	2	27	2867.83	1.35637e+06	46.5909	52.5511	SSBP1|17	ESETTTSLVLER	2	NA	NA	34	12	ESETTTSLVLER	11	38369	38380	0.951491	0.959924	0.819158	0.819521	0.944585	0.954464	0.807143	0.819521	47.7971	48.38	-0.582881	2	0	MOCK
451.283	34.9206	PRTC04_DIPVPKPK_2	29.92	39.92	451.284	451.282	451.283	3835	2	27	2160.59	4434641	33.0573	39.035	PRTC04	DIPVPKPK	2	8	Label:13C(6)15N(2)@K	2	8	DIPVPKPk	9	1414	1421	0.945741	0.952946	0.803929	0.741653	0.947121	0.954149	0.806473	0.761357	36.0099	34.92	1.08986	2	0	MOCK
680.374	71.767	PRTC14_ELASGLSFPVGFK_2	66.77	76.77	680.375	680.372	680.373	11819	2	27	4320.64	504869	69.9227	75.8871	PRTC14	ELASGLSFPVGFK	2	13	Label:13C(6)15N(2)@K	48	13	ELASGLSFPVGFk	10	57941	57953	0.94442	0.952413	0.802814	0.55634	0.863347	0.884066	0.690409	0.607034	72.0106	71.77	0.240618	2	0	MOCK
498.802	63.8572	PRTC12_LTILEELR_2	58.86	68.86	498.803	498.801	498.802	10339	2	27	3908.42	61258.6	61.9224	67.8974	PRTC12	LTILEELR	2	8	Label:13C(6)15N(4)@R	7	8	LTILEELr	6	6769	6776	0.934077	0.94303	0.784076	0.557198	0.738593	0.778279	0.567814	0.13711	65.1404	63.86	1.28036	2	0	MOCK
801.411	60.0386	PRTC10_GILFVGSGVSGGEEGAR_2	55.04	65.04	801.412	801.41	801.411	9529	2	27	3676.62	452604	58.3303	64.2927	PRTC10	GILFVGSGVSGGEEGAR	2	17	Label:13C(6)15N(4)@R	79	17	GILFVGSGVSGGEEGAr	10	132755	132771	0.924913	0.93157	0.763121	0.680609	0.635314	0.671816	0.468971	0.432601	61.2771	60.04	1.23706	2	0	MOCK
587.269	26.2323	TNFRSF12A|28_EQAPGTAPCSR_2	21.23	31.23	587.27	587.269	587.269	1473	2	27	1545.82	132723	24.5324	30.5059	TNFRSF12A|28	EQAPGTAPCSR	2	9	Carbamidomethyl@C	28	11	EQAPGTAPCSR	7	29838	29848	0.909604	0.917244	0.739182	0.648405	0.971528	0.972574	0.850557	0.576548	25.7637	26.23	-0.466347	2	0	MOCK
573.302	67.5684	PRTC13_NGFILDGFPR_2	62.57	72.57	573.303	573.301	573.302	11299	2	27	4182.01	58038.8	65.8476	71.8142	PRTC13	NGFILDGFPR	2	10	Label:13C(6)15N(4)@R	20	10	NGFILDGFPr	4	21847	21856	0.898429	0.908883	0.726128	0.635006	0.654142	0.678492	0.474732	0.626255	69.7002	67.57	2.13016	2	0	MOCK
496.287	29.929	PRTC03_HVLTSIGEK_2	24.93	34.93	496.288	496.286	496.287	3245	2	27	2006.81	812767	27.9654	33.899	PRTC03	HVLTSIGEK	2	9	Label:13C(6)15N(2)@K	13	9	HVLTSIGEk	4	11830	11838	0.874789	0.885118	0.691844	0.213343	0.917574	0.924929	0.751751	0.119868	33.4468	29.93	3.51684	2	0	MOCK
628.299	27.7828	ERO1A|24_EEQPPETAAQR_2	22.78	32.78	628.3	628.298	628.299	1992	2	27	1682.99	73352.3	26.047	31.996	ERO1A|24	EEQPPETAAQR	2	NA	NA	22	11	EEQPPETAAQR	2	23058	23068	0.848964	0.853598	0.651169	0.0747654	0.890606	0.890006	0.6986	-0.0741088	28.0498	27.78	0.269806	2	0	MOCK
558.326	56.6711	PRTC09_GLILVGGYGTR_2	51.67	61.67	558.327	558.325	558.326	9373	2	27	3633.83	404235	54.9966	60.9673	PRTC09	GLILVGGYGTR	2	11	Label:13C(6)15N(4)@R	29	11	GLILVGGYGTr	3	32958	32968	0.791964	0.808388	0.599319	0.640994	0.712225	0.734556	0.525219	0.352251	60.5638	56.67	3.89379	2	0	MOCK
695.832	45.6162	PRTC06_TASEFDSAIAQDK_2	40.62	50.62	695.833	695.831	695.832	5926	2	27	2710.38	3.7632e+06	43.6961	49.6546	PRTC06	TASEFDSAIAQDK	2	13	Label:13C(6)15N(2)@K	43	13	TASEFDSAIAQDk	12	49193	49205	0.790835	0.831088	0.624563	0.735345	0.857447	0.881751	0.687271	0.578647	45.1729	45.62	-0.447056	2	0	MOCK
758.338	44.9663	FBLN1|30_DVLLEACCADGHR_2	39.97	49.97	758.339	758.337	758.338	5654	2	27	2639.62	503389	43.0972	49.0258	FBLN1|30	DVLLEACCADGHR	2	7;8	Carbamidomethyl@C;Carbamidomethyl@C	53	13	DVLLEACCADGHR	6	67097	67109	0.785814	0.812489	0.603775	0.0316435	0.804605	0.829253	0.622468	0.0459726	43.9937	44.97	-0.976292	2	0	MOCK
507.602	41.2944	SSBP1|17_RESETTTSLVLER_3	36.29	46.29	507.603	507.601	507.602	5939	3	27	2713.78	168726	39.3526	45.3223	SSBP1|17	RESETTTSLVLER	3	NA	NA	49	13	RESETTTSLVLER	2	61697	61709	0.777505	0.773078	0.562568	-0.239687	0.752755	0.752779	0.542575	-0.190838	45.2297	41.29	3.93968	2	0	MOCK
570.276	58.136	PDIA3|26_RDVLELTDDNFESR_3	53.14	63.14	570.277	570.275	570.276	8418	3	27	3378.88	532786	56.2876	62.2536	PDIA3|26	RDVLELTDDNFESR	3	NA	NA	65	14	RDVLELTDDNFESR	1	92188	92201	0.775623	0.755985	0.545684	-0.248186	0.777842	0.757788	0.54744	-0.344019	56.3147	58.14	-1.82532	2	0	MOCK
493.768	26.3416	PRTC01_SSAAPPPPPR_2	21.34	31.34	493.769	493.767	493.768	2467	2	27	1804	415714	24.4214	30.4026	PRTC01	SSAAPPPPPR	2	10	Label:13C(6)15N(4)@R	18	10	SSAAPPPPPr	5	18625	18634	0.77215	0.801986	0.592446	0.33758	0.630487	0.680327	0.476325	0.392149	30.0667	26.34	3.72669	2	0	MOCK
427.226	43.2527	CALR|18_EPAVYFK_2	38.25	48.25	427.227	427.225	427.226	5170	2	27	2516.15	874504	41.7188	47.6864	CALR|18	EPAVYFK	2	NA	NA	1	7	EPAVYFK	5	30	36	0.770845	0.807128	0.597958	0.766957	0.782044	0.815956	0.607578	0.786087	41.9359	43.25	-1.31411	2	0	MOCK
613.317	30.6463	PRTC02_GISNEGQNASIK_2	25.65	35.65	613.318	613.316	613.317	2680	2	27	1857.73	1.89336e+06	28.8594	34.7907	PRTC02	GISNEGQNASIK	2	12	Label:13C(6)15N(2)@K	40	12	GISNEGQNASIk	11	45024	45035	0.744091	0.785556	0.575246	0.631572	0.548375	0.605085	0.413722	0.366526	30.9621	30.65	0.312101	2	0	MOCK
422.736	38.5693	PRTC05_IGDYAGIK_2	33.57	43.57	422.737	422.735	422.736	4414	2	27	2313.62	1.05722e+06	36.7506	42.7278	PRTC05	IGDYAGIK	2	8	Label:13C(6)15N(2)@K	6	8	IGDYAGIk	8	4809	4816	0.744008	0.78114	0.570723	0.6341	0.200102	0.332962	0.216096	0.411877	38.5603	38.57	-0.009684	2	0	MOCK
752.854	54.3255	HSP90B1|24_EVDVDGTVEEDLGK_2	49.33	59.33	752.855	752.853	752.854	8648	2	27	3441.09	2.44656e+06	52.5279	58.4914	HSP90B1|24	EVDVDGTVEEDLGK	2	NA	NA	57	14	EVDVDGTVEEDLGK	4	77134	77147	0.732076	0.753199	0.542981	0.253863	0.660109	0.688692	0.48363	0.117049	57.3515	54.33	3.0215	2	0	MOCK
760.356	53.4877	BAX|66_IGDELDSNMELQR_2	48.49	58.49	760.357	760.356	760.356	7789	2	27	3207.4	106945	51.6732	57.6322	BAX|66	IGDELDSNMELQR	2	NA	NA	44	13	IGDELDSNMELQR	1	51377	51389	0.715108	0.697362	0.491286	-0.305688	0.693263	0.677421	0.473805	-0.305688	53.4566	53.49	-0.033351	2	0	MOCK
586.8	46.4127	PRTC07_SAAGAFGPELSR_2	41.41	51.41	586.801	586.799	586.8	5936	2	27	2713.08	494833	44.7445	50.6859	PRTC07	SAAGAFGPELSR	2	12	Label:13C(6)15N(4)@R	32	12	SAAGAFGPELSr	5	33188	33199	0.700293	0.728907	0.519943	0.173996	0.432762	0.490179	0.326137	0.429387	45.2179	46.41	-1.19206	2	0	MOCK
598.297	34.4875	ENG|26_RETVHCDLQPVGPER_3	29.49	39.49	598.298	598.296	598.297	3220	3	27	2000.06	552642	32.9064	38.8936	ENG|26	RETVHCDLQPVGPER	3	6	Carbamidomethyl@C	69	15	RETVHCDLQPVGPER	1	105864	105878	0.658285	0.657014	0.456361	-0.376282	0.821978	0.805877	0.596612	-0.415789	33.3343	34.49	-1.15568	2	0	MOCK
554.272	47.8065	HSP90B1|24_REVDVDGTVEEDLGK_3	42.81	52.81	554.273	554.271	554.272	7236	3	27	3059.57	971539	45.9794	51.9259	HSP90B1|24	REVDVDGTVEEDLGK	3	NA	NA	68	15	REVDVDGTVEEDLGK	1	105318	105332	0.63066	0.625538	0.430241	-0.0873206	0.605321	0.600671	0.4102	-0.243336	50.9928	47.81	3.18277	2	0	MOCK
594.299	39.5989	FKBP11|26_EAGLETESPVR_2	34.6	44.6	594.3	594.298	594.299	4769	2	27	2409.41	317410	37.7593	43.7425	FKBP11|26	EAGLETESPVR	2	NA	NA	26	11	EAGLETESPVR	1	26358	26368	0.598722	0.60338	0.41236	-0.0605066	0.601302	0.60634	0.414726	-0.0605066	40.1569	39.6	0.556883	2	0	MOCK
337.187	35.4809	CALR|18_REPAVYFK_3	30.48	40.48	337.188	337.186	337.187	3302	3	27	2021.25	129056	33.1809	39.1712	CALR|18	REPAVYFK	3	NA	NA	3	8	REPAVYFK	1	2107	2114	0.576975	0.58882	0.400815	-0.35769	0.511381	0.532973	0.357851	-0.134647	33.6876	35.48	-1.79243	2	0	MOCK
818.891	39.83	ENG|26_ETVHCDLQPVGPER_2	34.83	44.83	818.892	818.89	818.891	4554	2	27	2350.97	75314.7	38.2588	44.1902	ENG|26	ETVHCDLQPVGPER	2	5	Carbamidomethyl@C	58	14	ETVHCDLQPVGPER	1	78018	78031	0.575107	0.573982	0.389204	-0.344019	0.647589	0.637407	0.439986	-0.344019	39.1829	39.83	-0.647102	2	0	MOCK
607.616	43.539	TMEM59|36_REAFDSVLGDTASCHR_3	38.54	48.54	607.617	607.615	607.616	5366	3	27	2565.69	4500575	41.4474	47.4246	TMEM59|36	REAFDSVLGDTASCHR	3	14	Carbamidomethyl@C	75	16	REAFDSVLGDTASCHR	1	123792	123807	0.539677	0.538926	0.362339	-0.439817	0.532764	0.534776	0.359208	-0.403807	42.7614	43.54	-0.778553	2	0	MOCK
448.569	33.1905	FKBP11|26_REAGLETESPVR_3	28.19	38.19	448.57	448.568	448.569	3894	3	27	2175.72	559720	31.0855	37.0335	FKBP11|26	REAGLETESPVR	3	NA	NA	39	12	REAGLETESPVR	1	44144	44155	0.514834	0.522799	0.350224	-0.314658	0.524344	0.532346	0.357379	-0.314658	36.262	33.19	3.07202	2	0	MOCK
702.834	41.5014	CPSF7|33_DVLTATSQPSDDR_2	36.5	46.5	702.835	702.833	702.834	5540	2	27	2610.29	275972	39.734	45.6881	CPSF7|33	DVLTATSQPSDDR	2	NA	NA	46	13	DVLTATSQPSDDR	1	56561	56573	0.487203	0.497561	0.331542	-0.0147091	0.488806	0.498812	0.33246	-0.197948	43.5049	41.5	2.00485	2	0	MOCK
467.733	29.7107	CENPU|49_NSDVSSIGR_2	24.71	34.71	467.734	467.732	467.733	2743	2	27	1874.51	352100	27.7931	33.7804	CENPU|49	NSDVSSIGR	2	NA	NA	11	9	NSDVSSIGR	1	9934	9942	0.481867	0.502422	0.335116	-0.218292	0.446961	0.471708	0.312724	-0.291606	31.2418	29.71	1.53182	2	0	MOCK
776.86	67.1829	PDIA3|26_DVLELTDDNFESR_2	62.18	72.18	776.861	776.859	776.86	10450	2	27	3942.82	1.10122e+06	65.4482	71.4234	PDIA3|26	DVLELTDDNFESR	2	NA	NA	52	13	DVLELTDDNFESR	1	64181	64193	0.477893	0.489548	0.325676	-0.0811985	0.516666	0.523393	0.350668	-0.20305	65.7136	67.18	-1.46636	2	0	MOCK
764.835	69.703	ATF4|76_EDAFSGTDWMLEK_2	64.7	74.7	764.836	764.834	764.835	12077	2	27	4388.05	4735021	68.0712	74.0387	ATF4|76	EDAFSGTDWMLEK	2	NA	NA	42	13	EDAFSGTDWMLEK	2	48365	48377	0.449676	0.469032	0.310794	-0.00629616	0.457081	0.474905	0.315035	-0.00629616	73.1341	69.7	3.4341	2	0	MOCK
681.355	58.8019	LSM3|7_REQQTTNTVEEPLDLIR_3	53.8	63.8	681.356	681.354	681.355	9472	3	27	3660.84	2.93962e+06	56.7949	62.7726	LSM3|7	REQQTTNTVEEPLDLIR	3	NA	NA	78	17	REQQTTNTVEEPLDLIR	2	130483	130499	0.419653	0.449238	0.296609	-0.358723	0.419888	0.449496	0.296793	-0.322093	61.0139	58.8	2.21395	2	0	MOCK
605.827	72.7819	BCL2|130_FATVVEELFR_2	67.78	77.78	605.828	605.826	605.827	11622	2	27	4267.7	818562	70.872	76.8619	BCL2|130	FATVVEELFR	2	NA	NA	16	10	FATVVEELFR	1	14728	14737	0.371617	0.402204	0.263512	-0.281853	0.330131	0.365673	0.238323	-0.22278	71.1284	72.78	-1.65158	2	0	MOCK
557.299	44.2714	PLA2R1|21_EGVAAALTPER_2	39.27	49.27	557.3	557.298	557.299	6021	2	27	2735.64	188744	42.4537	48.4098	PLA2R1|21	EGVAAALTPER	2	NA	NA	23	11	EGVAAALTPER	1	24868	24878	0.369899	0.396941	0.259856	-0.156004	0.386608	0.411647	0.270093	-0.217073	45.5941	44.27	1.32406	2	0	MOCK
557.928	36.8535	FBLN1|30_RDVLLEACCADGHR_3	31.85	41.85	557.929	557.927	557.928	3992	3	27	2201.1	899253	34.8958	40.8639	FBLN1|30	RDVLLEACCADGHR	3	8;9	Carbamidomethyl@C;Carbamidomethyl@C	64	14	RDVLLEACCADGHR	1	90576	90589	0.340898	0.361777	0.23566	-0.516136	0.373044	0.390944	0.255702	-0.507428	36.6849	36.85	-0.165064	2	0	MOCK
520.925	34.7462	CPSF7|33_RDVLTATSQPSDDR_3	29.75	39.75	520.926	520.924	520.925	3092	3	27	1967	3.37763e+06	32.556	38.5345	CPSF7|33	RDVLTATSQPSDDR	3	NA	NA	61	14	RDVLTATSQPSDDR	2	81710	81723	0.287866	0.331507	0.215114	-0.258815	0.278048	0.32163	0.208462	-0.212328	32.7833	34.75	-1.96665	2	0	MOCK
496.295	48.7357	ERN1|280_LTPTLYVGK_2	43.74	53.74	496.296	496.294	496.295	7569	2	27	3148.4	202238	47.0089	52.9806	ERN1|280	LTPTLYVGK	2	NA	NA	14	9	LTPTLYVGK	2	13294	13302	0.272316	0.345706	0.224721	-0.0976906	0.479007	0.526059	0.352662	-0.00513196	52.4733	48.74	3.73331	2	0	MOCK
364.519	25.9378	CENPU|49_RDSDVSSIGR_3	20.94	30.94	364.521	364.519	364.519	1798	3	27	1633.08	178509	23.9415	29.9165	CENPU|49	RDSDVSSIGR	3	NA	NA	19	10	RDSDVSSIGR	1	19759	19768	0.2163	0.259267	0.166962	-0.22278	0.211862	0.254933	0.164107	-0.213771	27.218	25.94	1.27797	2	0	MOCK
560.276	37.7312	FLNA|1502_RDADGTQTVNYVPSR_3	32.73	42.73	560.277	560.275	560.276	4911	3	27	2447.87	355255	35.8632	41.8006	FLNA|1502	RDADGTQTVNYVPSR	3	NA	NA	70	15	RDADGTQTVNYVPSR	1	110092	110106	0.192487	0.22898	0.147078	-0.3838	0.189727	0.225742	0.144961	-0.297642	40.7979	37.73	3.06786	2	0	MOCK
584.304	60.3621	P4HA3|29_DTFSALTSVAR_2	55.36	65.36	584.305	584.303	584.304	8924	2	27	3516.73	810359	58.6122	64.606	P4HA3|29	DTFSALTSVAR	2	NA	NA	27	11	DTFSALTSVAR	1	27248	27258	0.183759	0.232032	0.149075	-0.163321	0.16262	0.212867	0.13656	-0.231707	58.6122	60.36	-1.74776	2	0	MOCK
794.019	50.9195	EIF4B|46_RDLEGDVSTTWHSNDDDVYR_3	45.92	55.92	794.02	794.018	794.019	7512	3	27	3132.99	255317	48.8188	54.7949	EIF4B|46	RDLEGDVSTTWHSNDDDVYR	3	NA	NA	83	20	RDLEGDVSTTWHSNDDDVYR	1	136666	136685	0.159018	0.190459	0.121995	-0.158852	0.173723	0.203632	0.130549	-0.27203	52.2165	50.92	1.29647	2	0	MOCK
542.269	42.9302	CASP3|29_SGISLDNSYK_2	37.93	47.93	542.27	542.269	542.269	5040	2	27	2482.63	117087	41.2234	47.2011	CASP3|29	SGISLDNSYK	2	NA	NA	15	10	SGISLDNSYK	1	13450	13459	0.113802	0.167208	0.10695	-0.166667	0.102605	0.157242	0.100521	-0.175676	41.3772	42.93	-1.55277	2	0	MOCK
630.957	51.6242	HSP90B1|22_RDDEVDVDGTVEEDLGK_3	46.62	56.62	630.958	630.956	630.957	8053	3	27	3278.03	1.01854e+06	49.8774	55.8574	HSP90B1|22	RDDEVDVDGTVEEDLGK	3	NA	NA	77	17	RDDEVDVDGTVEEDLGK	2	127747	127763	0.0991876	0.152388	0.0973927	-0.0478939	0.122585	0.177069	0.113323	-0.139904	54.6338	51.62	3.01382	2	0	MOCK
329.53	27.6908	MTHFD2|36_REAVVISGR_3	22.69	32.69	329.531	329.529	329.53	2742	3	27	1874.28	424790	25.4693	31.4486	MTHFD2|36	REAVVISGR	3	NA	NA	10	9	REAVVISGR	2	9118	9126	0.0933118	0.175012	0.111993	-0.132881	0.0834513	0.165843	0.106069	-0.0520527	31.2379	27.69	3.54792	2	0	MOCK
832.87	52.702	TMEM59|36_EAFDSVLGDTASCHR_2	47.7	57.7	832.871	832.869	832.87	7856	2	27	3225.05	460451	50.8285	56.787	TMEM59|36	EAFDSVLGDTASCHR	2	13	Carbamidomethyl@C	66	15	EAFDSVLGDTASCHR	1	95784	95798	0.0603492	0.103684	0.0661262	-0.398838	0.101115	0.140629	0.0898249	-0.305161	53.7508	52.7	1.05082	2	0	MOCK
576.587	27.2043	IGFBP4|22_RDEAIHCPPCSEEK_3	22.2	32.2	576.588	576.586	576.587	1684	3	27	1602.54	53553.6	25.2064	31.1685	IGFBP4|22	RDEAIHCPPCSEEK	3	7;10	Carbamidomethyl@C;Carbamidomethyl@C	62	14	RDEAIHCPPCSEEK	1	84440	84453	0.00408855	0.0568157	0.0361896	-0.0683855	0.0421201	0.0916337	0.0584178	-0.291727	26.709	27.2	-0.490988	2	0	MOCK
443.882	22.4798	TNFRSF12A|28_REQAPGTAPCSR_3	17.48	27.48	443.884	443.882	443.883	546	3	27	1271.77	28045.8	21.1962	27.1625	TNFRSF12A|28	REQAPGTAPCSR	3	10	Carbamidomethyl@C	33	12	REQAPGTAPCSR	0	34992	35003	0	0	0	-0.444961	0	0	0	-0.444961	21.1962	22.48	-1.2838	2	0	MOCK
471.236	24.3151	ERO1A|24_REEQPPETAAQR_3	19.32	29.32	471.237	471.235	471.236	868	3	27	1369.11	12134.3	22.8184	28.7858	ERO1A|24	REEQPPETAAQR	3	NA	NA	37	12	REEQPPETAAQR	0	40063	40074	0	0	0	-0.444961	0	0	0	-0.496336	22.8184	24.32	-1.50156	2	0	MOCK
786.327	31.4927	IGFBP4|22_DEAIHCPPCSEEK_2	26.49	36.49	786.328	786.326	786.327	2345	2	27	1773.58	296729	29.5597	35.5403	IGFBP4|22	DEAIHCPPCSEEK	2	6;9	Carbamidomethyl@C;Carbamidomethyl@C	54	13	DEAIHCPPCSEEK	0	68705	68717	0	0	0	0.0935193	0	0	0	-0.317846	29.5597	31.49	-1.93026	2	0	MOCK
559.957	43.3358	P4HB|18_RDAPEEEDHVLVLR_3	38.34	48.34	559.958	559.956	559.957	5026	3	27	2478.67	113118	41.3111	47.2672	P4HB|18	RDAPEEEDHVLVLR	3	NA	NA	55	14	RDAPEEEDHVLVLR	0	70829	70842	0	0	0	-0.614104	0	0	0	-0.578204	41.3111	43.34	-2.02891	2	0	MOCK
761.368	41.0085	FLNA|1502_NADGTQTVNYVPSR_2	36.01	46.01	761.369	761.367	761.368	4585	2	27	2359.76	69918.3	39.3294	45.2874	FLNA|1502	NADGTQTVNYVPSR	2	NA	NA	60	14	NADGTQTVNYVPSR	0	79695	79708	0	0	0	-0.359216	0	0	0	-0.306924	39.3294	41.01	-1.68062	2	0	MOCK
806.875	19.0125	SHMT2|27_QHSNAAQTQTGEANR_2	14.01	24.01	806.876	806.874	806.875	82	2	27	1117.15	14079.1	18.6192	24.5987	SHMT2|27	QHSNAAQTQTGEANR	2	NA	NA	67	15	QHSNAAQTQTGEANR	0	97226	97240	0	0	0	0.434211	0	0	0	-0.346719	18.6192	19.01	-0.390768	2	0	MOCK
590.614	17.8991	SHMT2|27_REHSNAAQTQTGEANR_3	12.9	22.9	590.615	590.613	590.614	1	3	27	1082.24	9885.85	18.0373	24.032	SHMT2|27	REHSNAAQTQTGEANR	3	NA	NA	73	16	REHSNAAQTQTGEANR	0	113382	113397	0	0	0	-0.0196999	0	0	0	-0.500528	18.0373	17.9	0.137294	2	0	MOCK
867.881	58.2026	HSP90B1|22_DDEVDVDGTVEEDLGK_2	53.2	63.2	867.882	867.88	867.881	8426	2	27	3380.98	384649	56.3496	62.3197	HSP90B1|22	DDEVDVDGTVEEDLGK	2	NA	NA	74	16	DDEVDVDGTVEEDLGK	0	120567	120582	0	0	0	0.467324	0	0	0	-0.288941	56.3496	58.2	-1.85036	2	0	MOCK
848.393	68.08	UQCRHL|15_RDPEEEEEEEEELVDPLTTVR_3	63.08	73.08	848.394	848.392	848.393	10628	3	27	3994.88	471498	66.5814	72.5524	UQCRHL|15	RDPEEEEEEEEELVDPLTTVR	3	NA	NA	84	21	RDPEEEEEEEEELVDPLTTVR	0	138186	138206	0	0	0	0.238514	0	0	0	-0.429372	66.5814	68.08	-1.4986	2	0	MOCK
745.392	59.9233	PRTC11_SFANQPLEVVYSK_2	54.92	64.92	745.393	745.391	745.392	9157	2	27	3543.5	27027658	58.1598	64.1162	PRTC11	SFANQPLEVVYSK	2	13	Label:13C(6)15N(2)@K	45	13	SFANQPLEVVYSk	15	54282	54294	0.987479	0.989409	0.907265	0.915762	0.967942	0.972869	0.851368	0.783272	59.0583	59.92	-0.861658	3	0	MG132
836.415	69.2789	SQSTM1|421_NYDIGAALDTIQYSK_2	64.28	74.28	836.416	836.414	836.415	11498	2	27	4195.17	4076102	67.495	73.4621	SQSTM1|421	NYDIGAALDTIQYSK	2	NA	NA	71	15	NYDIGAALDTIQYSK	17	113228	113242	0.986772	0.988709	0.904242	0.874334	0.983915	0.98625	0.894306	0.86285	69.9196	69.28	0.639574	3	0	MG132
773.895	53.205	PRTC08_ELGQSGVDTYLQTK_2	48.21	58.21	773.896	773.894	773.895	7778	2	27	3173.31	1.51728e+06	51.4522	57.4028	PRTC08	ELGQSGVDTYLQTK	2	14	Label:13C(6)15N(2)@K	56	14	ELGQSGVDTYLQTk	14	74238	74251	0.9849	0.987509	0.899274	0.739008	0.903364	0.920681	0.744731	0.660932	52.8884	53.21	-0.321579	3	0	MG132
451.283	34.9206	PRTC04_DIPVPKPK_2	29.92	39.92	451.284	451.282	451.283	3406	2	27	2028.35	776343	33.0728	39.0378	PRTC04	DIPVPKPK	2	8	Label:13C(6)15N(2)@K	2	8	DIPVPKPk	4	972	979	0.980909	0.981195	0.876345	0.393268	0.98012	0.981916	0.878744	0.392173	33.8059	34.92	-1.11412	3	0	MG132
787.421	72.8278	PRTC15_LSSEAPALFQFDLK_2	67.83	77.83	787.422	787.42	787.421	12222	2	27	4384.49	6500942	71.0682	77.061	PRTC15	LSSEAPALFQFDLK	2	14	Label:13C(6)15N(2)@K	63	14	LSSEAPALFQFDLk	12	88174	88187	0.965099	0.967263	0.836654	0.249381	0.934585	0.937421	0.773587	0.181337	73.0748	72.83	0.244771	3	0	MG132
415.74	33.151	MTHFD2|36_EAVVISGR_2	28.15	38.15	415.741	415.739	415.74	2969	2	27	1916.55	808510	31.2779	37.2448	MTHFD2|36	EAVVISGR	2	NA	NA	4	8	EAVVISGR	6	3380	3387	0.954559	0.960638	0.820787	0.634373	0.959896	0.965119	0.83136	0.634373	31.9425	33.15	-1.2075	3	0	MG132
682.849	48.3756	SSBP1|17_ESETTTSLVLER_2	43.38	53.38	682.85	682.848	682.849	6553	2	27	2847.86	1.70219e+06	46.6105	52.5697	SSBP1|17	ESETTTSLVLER	2	NA	NA	34	12	ESETTTSLVLER	12	38912	38923	0.951123	0.959833	0.818953	0.747075	0.944082	0.954256	0.8067	0.747075	47.4643	48.38	-0.915749	3	0	MG132
761.381	51.6026	P4HB|18_DAPEEEDHVLVLR_2	46.6	56.6	761.382	761.38	761.381	7184	2	27	3016.51	1.295e+06	49.7286	55.6871	P4HB|18	DAPEEEDHVLVLR	2	NA	NA	51	13	DAPEEEDHVLVLR	20	62922	62934	0.94907	0.952274	0.802523	0.533435	0.892949	0.911825	0.730653	0.523176	50.2751	51.6	-1.32489	3	0	MG132
680.374	71.767	PRTC14_ELASGLSFPVGFK_2	66.77	76.77	680.375	680.372	680.373	12173	2	27	4371.21	1362520	69.913	75.8923	PRTC14	ELASGLSFPVGFK	2	13	Label:13C(6)15N(2)@K	48	13	ELASGLSFPVGFk	7	59250	59262	0.932382	0.938643	0.775833	0.477909	0.860325	0.87897	0.683537	0.493324	72.8535	71.77	1.08354	3	0	MG132
801.411	60.0386	PRTC10_GILFVGSGVSGGEEGAR_2	55.04	65.04	801.412	801.41	801.411	9922	2	27	3746.84	328953	58.3346	64.2996	PRTC10	GILFVGSGVSGGEEGAR	2	17	Label:13C(6)15N(4)@R	79	17	GILFVGSGVSGGEEGAr	9	135026	135042	0.927144	0.932753	0.765202	0.616323	0.640918	0.675402	0.472059	0.368315	62.4473	60.04	2.40732	3	0	MG132
587.269	26.2323	TNFRSF12A|28_EQAPGTAPCSR_2	21.23	31.23	587.27	587.269	587.269	1483	2	27	1540.7	265474	24.5322	30.5018	TNFRSF12A|28	EQAPGTAPCSR	2	9	Carbamidomethyl@C	28	11	EQAPGTAPCSR	6	30269	30279	0.920621	0.926295	0.754049	0.540994	0.952237	0.955425	0.809205	0.460694	25.6784	26.23	-0.55162	3	0	MG132
498.802	63.8572	PRTC12_LTILEELR_2	58.86	68.86	498.803	498.801	498.802	10400	2	27	3883.27	107337	61.9297	67.898	PRTC12	LTILEELR	2	8	Label:13C(6)15N(4)@R	7	8	LTILEELr	6	6544	6551	0.914858	0.925798	0.753211	0.557198	0.723901	0.764769	0.554294	0.13711	64.7212	63.86	0.861205	3	0	MG132
573.302	67.5684	PRTC13_NGFILDGFPR_2	62.57	72.57	573.303	573.301	573.302	10866	2	27	4023.21	630290	65.84	71.8333	PRTC13	NGFILDGFPR	2	10	Label:13C(6)15N(4)@R	20	10	NGFILDGFPr	5	21271	21280	0.901076	0.914902	0.735465	0.750965	0.581454	0.613106	0.42016	0.503089	67.0534	67.57	-0.516569	3	0	MG132
628.299	27.7828	ERO1A|24_EEQPPETAAQR_2	22.78	32.78	628.3	628.298	628.299	1979	2	27	1667.04	473936	26.055	32.0157	ERO1A|24	EEQPPETAAQR	2	NA	NA	22	11	EEQPPETAAQR	3	23359	23369	0.893783	0.901473	0.715027	0.203189	0.937716	0.940218	0.778758	0.061257	27.784	27.78	0.003998	3	0	MG132
496.287	29.929	PRTC03_HVLTSIGEK_2	24.93	34.93	496.288	496.286	496.287	3250	2	27	1989.62	1.28574e+06	27.9489	33.9349	PRTC03	HVLTSIGEK	2	9	Label:13C(6)15N(2)@K	13	9	HVLTSIGEk	3	11894	11902	0.888396	0.892903	0.702671	0.357038	0.911914	0.917513	0.739613	0.0172287	33.1603	29.93	3.23026	3	0	MG132
493.768	26.3416	PRTC01_SSAAPPPPPR_2	21.34	31.34	493.769	493.767	493.768	2486	2	27	1793.3	900309	24.4094	30.3974	PRTC01	SSAAPPPPPR	2	10	Label:13C(6)15N(4)@R	18	10	SSAAPPPPPr	3	18823	18832	0.85361	0.859587	0.658558	0.0756757	0.645534	0.679852	0.475912	0.138996	29.8883	26.34	3.54832	3	0	MG132
471.236	24.3151	ERO1A|24_REEQPPETAAQR_3	19.32	29.32	471.237	471.235	471.236	1163	3	27	1455.7	249880	22.8251	28.7881	ERO1A|24	REEQPPETAAQR	3	NA	NA	37	12	REEQPPETAAQR	1	41519	41530	0.828194	0.81346	0.604838	-0.314658	0.827076	0.814501	0.605978	-0.366032	24.2616	24.32	-0.058416	3	0	MG132
761.368	41.0085	FLNA|1502_NADGTQTVNYVPSR_2	36.01	46.01	761.369	761.367	761.368	4945	2	27	2433.92	200908	39.333	45.3113	FLNA|1502	NADGTQTVNYVPSR	2	NA	NA	60	14	NADGTQTVNYVPSR	1	81336	81349	0.804091	0.786857	0.576586	-0.248186	0.799862	0.783407	0.57304	-0.195893	40.5653	41.01	-0.444654	3	0	MG132
558.326	56.6711	PRTC09_GLILVGGYGTR_2	51.67	61.67	558.327	558.325	558.326	9356	2	27	3595.15	918163	55.0169	60.9905	PRTC09	GLILVGGYGTR	2	11	Label:13C(6)15N(4)@R	29	11	GLILVGGYGTr	4	33289	33299	0.79337	0.814301	0.605759	0.755441	0.746354	0.768847	0.558339	0.460694	59.9192	56.67	3.24924	3	0	MG132
695.832	45.6162	PRTC06_TASEFDSAIAQDK_2	40.62	50.62	695.833	695.831	695.832	5911	2	27	2682.9	5871543	43.7114	49.6574	PRTC06	TASEFDSAIAQDK	2	13	Label:13C(6)15N(2)@K	43	13	TASEFDSAIAQDk	11	49926	49938	0.787485	0.828074	0.621126	0.672275	0.858225	0.882306	0.68802	0.64975	44.715	45.62	-0.905048	3	0	MG132
760.356	53.4877	BAX|66_IGDELDSNMELQR_2	48.49	58.49	760.357	760.356	760.356	7877	2	27	3199.29	239276	51.656	57.6221	BAX|66	IGDELDSNMELQR	2	NA	NA	44	13	IGDELDSNMELQR	5	52218	52230	0.779694	0.800828	0.591214	0.0953104	0.765556	0.78861	0.578398	0.0810899	53.3215	53.49	-0.16847	3	0	MG132
758.338	44.9663	FBLN1|30_DVLLEACCADGHR_2	39.97	49.97	758.339	758.337	758.338	5659	2	27	2617.35	639470	43.0596	49.0477	FBLN1|30	DVLLEACCADGHR	2	7;8	Carbamidomethyl@C;Carbamidomethyl@C	53	13	DVLLEACCADGHR	3	68022	68034	0.769316	0.773239	0.56273	-0.218411	0.761221	0.769867	0.559355	-0.218302	43.6226	44.97	-1.34743	3	0	MG132
427.226	43.2527	CALR|18_EPAVYFK_2	38.25	48.25	427.227	427.225	427.226	5211	2	27	2503.62	1.65132e+06	41.727	47.6919	CALR|18	EPAVYFK	2	NA	NA	1	7	EPAVYFK	6	0	6	0.766724	0.805105	0.595783	0.626957	0.778906	0.814541	0.606023	0.646957	41.727	43.25	-1.52295	3	0	MG132
422.736	38.5693	PRTC05_IGDYAGIK_2	33.57	43.57	422.737	422.735	422.736	4363	2	27	2279.92	20017032	36.7491	42.7346	PRTC05	IGDYAGIK	2	8	Label:13C(6)15N(2)@K	6	8	IGDYAGIk	8	4724	4731	0.744272	0.780556	0.570128	0.6341	0.181067	0.315859	0.204585	0.407499	37.9986	38.57	-0.571382	3	0	MG132
613.317	30.6463	PRTC02_GISNEGQNASIK_2	25.65	35.65	613.318	613.316	613.317	2739	2	27	1855.91	1.38333e+06	28.8268	34.8113	PRTC02	GISNEGQNASIK	2	12	Label:13C(6)15N(2)@K	40	12	GISNEGQNASIk	12	45820	45831	0.743748	0.784124	0.573775	0.37759	0.562337	0.616552	0.422942	0.298872	30.9318	30.65	0.281776	3	0	MG132
586.8	46.4127	PRTC07_SAAGAFGPELSR_2	41.41	51.41	586.801	586.799	586.8	6334	2	27	2791.81	4.46059e+06	44.7117	50.7031	PRTC07	SAAGAFGPELSR	2	12	Label:13C(6)15N(4)@R	32	12	SAAGAFGPELSr	14	34094	34105	0.686521	0.733708	0.524424	0.555955	0.337869	0.425957	0.280125	0.371741	46.5302	46.41	0.120196	3	0	MG132
818.891	39.83	ENG|26_ETVHCDLQPVGPER_2	34.83	44.83	818.892	818.89	818.891	4580	2	27	2335.78	76206.7	38.2468	44.2061	ENG|26	ETVHCDLQPVGPER	2	5	Carbamidomethyl@C	58	14	ETVHCDLQPVGPER	2	79061	79074	0.679679	0.684124	0.479631	-0.24174	0.764466	0.757896	0.547546	-0.237386	38.9296	39.83	-0.90039	3	0	MG132
752.854	54.3255	HSP90B1|24_EVDVDGTVEEDLGK_2	49.33	59.33	752.855	752.853	752.854	8796	2	27	3447.65	2.67312e+06	52.5083	58.494	HSP90B1|24	EVDVDGTVEEDLGK	2	NA	NA	57	14	EVDVDGTVEEDLGK	1	78320	78333	0.673968	0.665295	0.463389	-0.0204901	0.634671	0.623679	0.428725	-0.14057	57.4609	54.33	3.1309	3	0	MG132
598.297	34.4875	ENG|26_RETVHCDLQPVGPER_3	29.49	39.49	598.298	598.296	598.297	3204	3	27	1977.9	780489	32.8977	38.8726	ENG|26	RETVHCDLQPVGPER	3	6	Carbamidomethyl@C	69	15	RETVHCDLQPVGPER	1	107180	107194	0.658285	0.657014	0.456361	-0.376282	0.821978	0.805877	0.596612	-0.415789	32.965	34.49	-1.52505	3	0	MG132
554.272	47.8065	HSP90B1|24_REVDVDGTVEEDLGK_3	42.81	52.81	554.273	554.271	554.272	7234	3	27	3029.63	694961	45.9722	51.9444	HSP90B1|24	REVDVDGTVEEDLGK	3	NA	NA	68	15	REVDVDGTVEEDLGK	2	106522	106536	0.657526	0.66003	0.458913	0.00126451	0.63855	0.641274	0.443187	-0.154751	50.4938	47.81	2.68378	3	0	MG132
507.602	41.2944	SSBP1|17_RESETTTSLVLER_3	36.29	46.29	507.603	507.601	507.602	5935	3	27	2689.25	250182	39.3562	45.2995	SSBP1|17	RESETTTSLVLER	3	NA	NA	49	13	RESETTTSLVLER	1	62574	62586	0.644106	0.635765	0.43863	-0.354538	0.61643	0.612613	0.419763	-0.305688	44.8208	41.29	3.53078	3	0	MG132
764.835	69.703	ATF4|76_EDAFSGTDWMLEK_2	64.7	74.7	764.836	764.834	764.835	12196	2	27	4377.48	51375128	68.0703	74.0402	ATF4|76	EDAFSGTDWMLEK	2	NA	NA	42	13	EDAFSGTDWMLEK	1	49146	49158	0.619141	0.616895	0.423219	-0.0760964	0.594066	0.592514	0.403729	-0.0760964	72.958	69.7	3.25801	3	0	MG132
594.299	39.5989	FKBP11|26_EAGLETESPVR_2	34.6	44.6	594.3	594.298	594.299	5388	2	27	2548.32	320206	37.7578	43.7074	FKBP11|26	EAGLETESPVR	2	NA	NA	26	11	EAGLETESPVR	2	27389	27399	0.608052	0.621169	0.426684	0.0321763	0.609621	0.623056	0.428218	0.0321763	42.472	39.6	2.87196	3	0	MG132
337.187	35.4809	CALR|18_REPAVYFK_3	30.48	40.48	337.188	337.186	337.187	3347	3	27	2014.15	295653	33.1896	39.1529	CALR|18	REPAVYFK	3	NA	NA	3	8	REPAVYFK	1	2099	2106	0.576975	0.58882	0.400815	-0.35769	0.511381	0.532973	0.357851	-0.134647	33.5692	35.48	-1.9108	3	0	MG132
584.304	60.3621	P4HA3|29_DTFSALTSVAR_2	55.36	65.36	584.305	584.303	584.304	9729	2	27	3695.68	122498	58.6143	64.5911	P4HA3|29	DTFSALTSVAR	2	NA	NA	27	11	DTFSALTSVAR	1	28539	28549	0.572628	0.578112	0.392421	-0.134053	0.574544	0.580306	0.394134	-0.202439	61.5946	60.36	1.23461	3	0	MG132
329.53	27.6908	MTHFD2|36_REAVVISGR_3	22.69	32.69	329.531	329.529	329.53	1740	3	27	1607.12	1.87403e+06	25.4801	31.4523	MTHFD2|36	REAVVISGR	3	NA	NA	10	9	REAVVISGR	1	8166	8174	0.550791	0.564065	0.381527	-0.218292	0.543374	0.557813	0.376719	-0.137463	26.7854	27.69	-0.90463	3	0	MG132
607.616	43.539	TMEM59|36_REAFDSVLGDTASCHR_3	38.54	48.54	607.617	607.615	607.616	5383	3	27	2546.93	3826732	41.426	47.4042	TMEM59|36	REAFDSVLGDTASCHR	3	14	Carbamidomethyl@C	75	16	REAFDSVLGDTASCHR	1	125318	125333	0.539677	0.538926	0.362339	-0.439817	0.532764	0.534776	0.359208	-0.403807	42.4488	43.54	-1.0912	3	0	MG132
448.569	33.1905	FKBP11|26_REAGLETESPVR_3	28.19	38.19	448.57	448.568	448.569	2861	3	27	1888.07	446011	31.0601	37.0354	FKBP11|26	REAGLETESPVR	3	NA	NA	39	12	REAGLETESPVR	3	43345	43356	0.522052	0.566837	0.383666	-0.153347	0.496496	0.544477	0.366544	-0.153206	31.4679	33.19	-1.72212	3	0	MG132
867.881	58.2026	HSP90B1|22_DDEVDVDGTVEEDLGK_2	53.2	63.2	867.882	867.88	867.881	9535	2	27	3642.77	335684	56.3506	62.3287	HSP90B1|22	DDEVDVDGTVEEDLGK	2	NA	NA	74	16	DDEVDVDGTVEEDLGK	1	124208	124223	0.496189	0.508617	0.339686	0.560767	0.373005	0.390517	0.255408	-0.195499	60.7128	58.2	2.51276	3	0	MG132
702.834	41.5014	CPSF7|33_DVLTATSQPSDDR_2	36.5	46.5	702.835	702.833	702.834	5297	2	27	2524.85	617655	39.7068	45.6841	CPSF7|33	DVLTATSQPSDDR	2	NA	NA	46	13	DVLTATSQPSDDR	1	57114	57126	0.487203	0.497561	0.331542	-0.0147091	0.488806	0.498812	0.33246	-0.197948	42.0808	41.5	0.580795	3	0	MG132
467.733	29.7107	CENPU|49_NSDVSSIGR_2	24.71	34.71	467.734	467.732	467.733	3105	2	27	1952.34	243323	27.8071	33.7765	CENPU|49	NSDVSSIGR	2	NA	NA	11	9	NSDVSSIGR	1	10374	10382	0.481867	0.502422	0.335116	-0.218292	0.446961	0.471708	0.312724	-0.291606	32.5391	29.71	2.82906	3	0	MG132
776.86	67.1829	PDIA3|26_DVLELTDDNFESR_2	62.18	72.18	776.861	776.859	776.86	10541	2	27	3928.98	3779138	65.4537	71.4165	PDIA3|26	DVLELTDDNFESR	2	NA	NA	52	13	DVLELTDDNFESR	1	64974	64986	0.477893	0.489548	0.325676	-0.0811985	0.516666	0.523393	0.350668	-0.20305	65.483	67.18	-1.69699	3	0	MG132
443.882	22.4798	TNFRSF12A|28_REQAPGTAPCSR_3	17.48	27.48	443.884	443.882	443.883	1540	3	27	1555.96	2.6025e+06	21.1977	27.1829	TNFRSF12A|28	REQAPGTAPCSR	3	10	Carbamidomethyl@C	33	12	REQAPGTAPCSR	1	38274	38285	0.447592	0.466449	0.308934	-0.320719	0.473567	0.489701	0.325788	-0.320719	25.9327	22.48	3.45268	3	0	MG132
570.276	58.136	PDIA3|26_RDVLELTDDNFESR_3	53.14	63.14	570.277	570.275	570.276	9078	3	27	3523.96	1.01359e+06	56.2876	62.2606	PDIA3|26	RDVLELTDDNFESR	3	NA	NA	65	14	RDVLELTDDNFESR	2	94531	94544	0.426321	0.460764	0.304849	-0.198156	0.400145	0.437432	0.288224	-0.311406	58.7327	58.14	0.592688	3	0	MG132
557.299	44.2714	PLA2R1|21_EGVAAALTPER_2	39.27	49.27	557.3	557.298	557.299	6452	2	27	2821.8	292212	42.423	48.3867	PLA2R1|21	EGVAAALTPER	2	NA	NA	23	11	EGVAAALTPER	1	25649	25659	0.385054	0.410204	0.269085	-0.14137	0.387702	0.412607	0.270763	-0.209756	47.0299	44.27	2.75993	3	0	MG132
605.827	72.7819	BCL2|130_FATVVEELFR_2	67.78	77.78	605.828	605.826	605.827	11725	2	27	4254.52	2.26947e+06	70.8718	76.8626	BCL2|130	FATVVEELFR	2	NA	NA	16	10	FATVVEELFR	3	14827	14836	0.382048	0.439127	0.289425	-0.071686	0.34548	0.406998	0.266849	-0.00411844	70.9087	72.78	-1.87126	3	0	MG132
560.276	37.7312	FLNA|1502_RDADGTQTVNYVPSR_3	32.73	42.73	560.277	560.275	560.276	4007	3	27	2184.63	1.31272e+06	35.8577	41.8088	FLNA|1502	RDADGTQTVNYVPSR	3	NA	NA	70	15	RDADGTQTVNYVPSR	1	109756	109770	0.370747	0.389769	0.25489	-0.380041	0.387691	0.405615	0.265886	-0.293882	36.4106	37.73	-1.31942	3	0	MG132
557.928	36.8535	FBLN1|30_RDVLLEACCADGHR_3	31.85	41.85	557.929	557.927	557.928	3989	3	27	2179.97	1.09694e+06	34.8848	40.8436	FBLN1|30	RDVLLEACCADGHR	3	8;9	Carbamidomethyl@C;Carbamidomethyl@C	64	14	RDVLLEACCADGHR	1	91723	91736	0.340898	0.361777	0.23566	-0.516136	0.373044	0.390944	0.255702	-0.507428	36.3328	36.85	-0.517245	3	0	MG132
681.355	58.8019	LSM3|7_REQQTTNTVEEPLDLIR_3	53.8	63.8	681.356	681.354	681.355	9528	3	27	3640.9	4856804	56.796	62.7732	LSM3|7	REQQTTNTVEEPLDLIR	3	NA	NA	78	17	REQQTTNTVEEPLDLIR	2	132002	132018	0.318754	0.357781	0.232933	-0.48647	0.318091	0.356695	0.232193	-0.44984	60.6817	58.8	1.88173	3	0	MG132
630.957	51.6242	HSP90B1|22_RDDEVDVDGTVEEDLGK_3	46.62	56.62	630.958	630.956	630.957	7144	3	27	3005.67	2.27758e+06	49.9012	55.8684	HSP90B1|22	RDDEVDVDGTVEEDLGK	3	NA	NA	77	17	RDDEVDVDGTVEEDLGK	1	127154	127170	0.285314	0.308985	0.199979	-0.0986723	0.293722	0.317049	0.205384	-0.193475	50.0945	51.62	-1.52548	3	0	MG132
496.295	48.7357	ERN1|280_LTPTLYVGK_2	43.74	53.74	496.296	496.294	496.295	7620	2	27	3132.46	178835	47.0221	52.983	ERN1|280	LTPTLYVGK	2	NA	NA	14	9	LTPTLYVGK	2	13374	13382	0.281653	0.349227	0.227111	-0.0976906	0.511332	0.548042	0.369253	-0.00513196	52.2076	48.74	3.46762	3	0	MG132
520.925	34.7462	CPSF7|33_RDVLTATSQPSDDR_3	29.75	39.75	520.926	520.924	520.925	3364	3	27	2018.11	959284	32.5561	38.5179	CPSF7|33	RDVLTATSQPSDDR	3	NA	NA	61	14	RDVLTATSQPSDDR	2	83182	83195	0.258934	0.307539	0.199011	-0.262998	0.289949	0.334827	0.217356	-0.212243	33.6351	34.75	-1.11487	3	0	MG132
794.019	50.9195	EIF4B|46_RDLEGDVSTTWHSNDDDVYR_3	45.92	55.92	794.02	794.018	794.019	7563	3	27	3117.04	2531667	48.8384	54.8148	EIF4B|46	RDLEGDVSTTWHSNDDDVYR	3	NA	NA	83	20	RDLEGDVSTTWHSNDDDVYR	1	138244	138263	0.238875	0.263318	0.169634	-0.154751	0.26558	0.287671	0.185762	-0.267929	51.9507	50.92	1.03068	3	0	MG132
364.519	25.9378	CENPU|49_RDSDVSSIGR_3	20.94	30.94	364.521	364.519	364.519	1822	3	27	1628.19	1.14445e+06	23.9415	29.9297	CENPU|49	RDSDVSSIGR	3	NA	NA	19	10	RDSDVSSIGR	1	20029	20038	0.2163	0.259267	0.166962	-0.22278	0.211862	0.254933	0.164107	-0.213771	27.1364	25.94	1.19642	3	0	MG132
542.269	42.9302	CASP3|29_SGISLDNSYK_2	37.93	47.93	542.27	542.269	542.269	5097	2	27	2474.03	135965	41.2338	47.2119	CASP3|29	SGISLDNSYK	2	NA	NA	15	10	SGISLDNSYK	1	13558	13567	0.113802	0.167208	0.10695	-0.166667	0.102605	0.157242	0.100521	-0.175676	41.2338	42.93	-1.6962	3	0	MG132
832.87	52.702	TMEM59|36_EAFDSVLGDTASCHR_2	47.7	57.7	832.871	832.869	832.87	7724	2	27	3159.39	1959688	50.8264	56.7882	TMEM59|36	EAFDSVLGDTASCHR	2	13	Carbamidomethyl@C	66	15	EAFDSVLGDTASCHR	1	96638	96652	0.0603492	0.103684	0.0661262	-0.398838	0.101115	0.140629	0.0898249	-0.305161	52.6565	52.7	-0.043514	3	0	MG132
576.587	27.2043	IGFBP4|22_RDEAIHCPPCSEEK_3	22.2	32.2	576.588	576.586	576.587	2311	3	27	1750.25	347885	25.1843	31.1791	IGFBP4|22	RDEAIHCPPCSEEK	3	7;10	Carbamidomethyl@C;Carbamidomethyl@C	62	14	RDEAIHCPPCSEEK	1	86588	86601	0.00408855	0.0568157	0.0361896	-0.0683855	0.0421201	0.0916337	0.0584178	-0.291727	29.1708	27.2	1.97077	3	0	MG132
786.327	31.4927	IGFBP4|22_DEAIHCPPCSEEK_2	26.49	36.49	786.328	786.326	786.327	2401	2	27	1772.91	274620	29.5485	35.5346	IGFBP4|22	DEAIHCPPCSEEK	2	6;9	Carbamidomethyl@C;Carbamidomethyl@C	54	13	DEAIHCPPCSEEK	0	69750	69762	0	0	0	0.0935193	0	0	0	-0.317846	29.5485	31.49	-1.94146	3	0	MG132
559.957	43.3358	P4HB|18_RDAPEEEDHVLVLR_3	38.34	48.34	559.958	559.956	559.957	5109	3	27	2477.35	355413	41.2891	47.28	P4HB|18	RDAPEEEDHVLVLR	3	NA	NA	55	14	RDAPEEEDHVLVLR	0	71898	71911	0	0	0	-0.614104	0	0	0	-0.578204	41.2891	43.34	-2.05091	3	0	MG132
806.875	19.0125	SHMT2|27_QHSNAAQTQTGEANR_2	14.01	24.01	806.876	806.874	806.875	83	2	27	1117.16	19172.5	18.6194	24.5979	SHMT2|27	QHSNAAQTQTGEANR	2	NA	NA	67	15	QHSNAAQTQTGEANR	0	98570	98584	0	0	0	0.434211	0	0	0	-0.346719	18.6194	19.01	-0.390587	3	0	MG132
590.614	17.8991	SHMT2|27_REHSNAAQTQTGEANR_3	12.9	22.9	590.615	590.613	590.614	1	3	27	1082.12	40386.8	18.0354	24.0265	SHMT2|27	REHSNAAQTQTGEANR	3	NA	NA	73	16	REHSNAAQTQTGEANR	0	114908	114923	0	0	0	-0.0196999	0	0	0	-0.500528	18.0354	17.9	0.135369	3	0	MG132
848.393	68.08	UQCRHL|15_RDPEEEEEEEEELVDPLTTVR_3	63.08	73.08	848.394	848.392	848.393	10764	3	27	3994.7	485314	66.5784	72.5619	UQCRHL|15	RDPEEEEEEEEELVDPLTTVR	3	NA	NA	84	21	RDPEEEEEEEEELVDPLTTVR	0	139935	139955	0	0	0	0.238514	0	0	0	-0.429372	66.5784	68.08	-1.50163	3	0	MG132
745.392	59.9233	PRTC11_SFANQPLEVVYSK_2	54.92	64.92	745.393	745.391	745.392	9072	2	27	3552.87	15167274	58.154	64.1165	PRTC11	SFANQPLEVVYSK	2	13	Label:13C(6)15N(2)@K	45	13	SFANQPLEVVYSk	15	53548	53560	0.987618	0.989501	0.90767	0.915328	0.966264	0.971414	0.847416	0.778495	59.2145	59.92	-0.705511	4	0	MG132
836.415	69.2789	SQSTM1|421_NYDIGAALDTIQYSK_2	64.28	74.28	836.416	836.414	836.415	11398	2	27	4207.61	1.10788e+06	67.4944	73.459	SQSTM1|421	NYDIGAALDTIQYSK	2	NA	NA	71	15	NYDIGAALDTIQYSK	14	111937	111951	0.987258	0.988381	0.902858	0.718216	0.982135	0.983883	0.885549	0.709877	70.1268	69.28	0.84683	4	0	MG132
773.895	53.205	PRTC08_ELGQSGVDTYLQTK_2	48.21	58.21	773.896	773.894	773.895	7668	2	27	3171.73	14644639	51.4604	57.406	PRTC08	ELGQSGVDTYLQTK	2	14	Label:13C(6)15N(2)@K	56	14	ELGQSGVDTYLQTk	16	73224	73237	0.984648	0.987277	0.898339	0.751942	0.909269	0.925316	0.7524	0.791941	52.8622	53.21	-0.347814	4	0	MG132
787.421	72.8278	PRTC15_LSSEAPALFQFDLK_2	67.83	77.83	787.422	787.42	787.421	12067	2	27	4384.34	10837721	71.0837	77.0625	PRTC15	LSSEAPALFQFDLK	2	14	Label:13C(6)15N(2)@K	63	14	LSSEAPALFQFDLk	17	86991	87004	0.976901	0.97923	0.870023	0.539102	0.951164	0.955523	0.809417	0.590071	73.0723	72.83	0.242279	4	0	MG132
761.381	51.6026	P4HB|18_DAPEEEDHVLVLR_2	46.6	56.6	761.382	761.38	761.381	7140	2	27	3028.93	955672	49.7342	55.7136	P4HB|18	DAPEEEDHVLVLR	2	NA	NA	51	13	DAPEEEDHVLVLR	19	62128	62140	0.953821	0.957198	0.813067	0.576096	0.894338	0.911406	0.730004	0.576368	50.4821	51.6	-1.11789	4	0	MG132
682.849	48.3756	SSBP1|17_ESETTTSLVLER_2	43.38	53.38	682.85	682.848	682.849	6504	2	27	2855.99	791574	46.592	52.5647	SSBP1|17	ESETTTSLVLER	2	NA	NA	34	12	ESETTTSLVLER	11	38357	38368	0.947944	0.957035	0.812708	0.675335	0.941977	0.952326	0.802632	0.675335	47.5998	48.38	-0.780191	4	0	MG132
451.283	34.9206	PRTC04_DIPVPKPK_2	29.92	39.92	451.284	451.282	451.283	3778	2	27	2138.25	14634176	33.0656	39.0175	PRTC04	DIPVPKPK	2	8	Label:13C(6)15N(2)@K	2	8	DIPVPKPk	9	1331	1338	0.947512	0.954623	0.807484	0.741653	0.946083	0.953314	0.804704	0.761357	35.6375	34.92	0.717501	4	0	MG132
415.74	33.151	MTHFD2|36_EAVVISGR_2	28.15	38.15	415.741	415.739	415.74	2999	2	27	1937.84	254373	31.2603	37.2302	MTHFD2|36	EAVVISGR	2	NA	NA	4	8	EAVVISGR	5	3452	3459	0.945662	0.951228	0.800353	0.524904	0.9537	0.958035	0.814916	0.524904	32.2974	33.15	-0.852596	4	0	MG132
680.374	71.767	PRTC14_ELASGLSFPVGFK_2	66.77	76.77	680.375	680.372	680.373	11988	2	27	4362.72	620611	69.9293	75.891	PRTC14	ELASGLSFPVGFK	2	13	Label:13C(6)15N(2)@K	48	13	ELASGLSFPVGFk	12	58336	58348	0.934197	0.945464	0.788782	0.708044	0.841304	0.866347	0.667076	0.770788	72.7121	71.77	0.942071	4	0	MG132
801.411	60.0386	PRTC10_GILFVGSGVSGGEEGAR_2	55.04	65.04	801.412	801.41	801.411	9004	2	27	3535.45	978433	58.3306	64.3011	PRTC10	GILFVGSGVSGGEEGAR	2	17	Label:13C(6)15N(4)@R	79	17	GILFVGSGVSGGEEGAr	16	131759	131775	0.926171	0.933982	0.76738	0.682189	0.623809	0.664175	0.462434	0.548329	58.9242	60.04	-1.11585	4	0	MG132
498.802	63.8572	PRTC12_LTILEELR_2	58.86	68.86	498.803	498.801	498.802	10383	2	27	3921.26	71336.4	61.907	67.9014	PRTC12	LTILEELR	2	8	Label:13C(6)15N(4)@R	7	8	LTILEELr	7	6903	6910	0.909501	0.928743	0.75822	0.651067	0.555443	0.62897	0.433046	0.289546	65.3544	63.86	1.49435	4	0	MG132
587.269	26.2323	TNFRSF12A|28_EQAPGTAPCSR_2	21.23	31.23	587.27	587.269	587.269	1495	2	27	1548.72	78539	24.5269	30.4979	TNFRSF12A|28	EQAPGTAPCSR	2	9	Carbamidomethyl@C	28	11	EQAPGTAPCSR	6	29868	29878	0.908061	0.917058	0.738885	0.521295	0.915806	0.924849	0.751618	0.433114	25.812	26.23	-0.418028	4	0	MG132
496.287	29.929	PRTC03_HVLTSIGEK_2	24.93	34.93	496.288	496.286	496.287	3258	2	27	2004	729139	27.9507	33.9333	PRTC03	HVLTSIGEK	2	9	Label:13C(6)15N(2)@K	13	9	HVLTSIGEk	3	11824	11832	0.889832	0.893566	0.70361	0.357038	0.927633	0.931496	0.762991	0.0172287	33.4	29.93	3.47002	4	0	MG132
573.302	67.5684	PRTC13_NGFILDGFPR_2	62.57	72.57	573.303	573.301	573.302	10690	2	27	4011.61	643432	65.8465	71.8157	PRTC13	NGFILDGFPR	2	10	Label:13C(6)15N(4)@R	20	10	NGFILDGFPr	6	20895	20904	0.87344	0.892329	0.701859	0.634106	0.540034	0.576144	0.390886	0.385457	66.8602	67.57	-0.709817	4	0	MG132
471.236	24.3151	ERO1A|24_REEQPPETAAQR_3	19.32	29.32	471.237	471.235	471.236	1171	3	27	1458.82	76593.1	22.8167	28.8117	ERO1A|24	REEQPPETAAQR	3	NA	NA	37	12	REEQPPETAAQR	1	40920	40931	0.828194	0.81346	0.604838	-0.314658	0.827076	0.814501	0.605978	-0.366032	24.3137	24.32	-0.006291	4	0	MG132
493.768	26.3416	PRTC01_SSAAPPPPPR_2	21.34	31.34	493.769	493.767	493.768	2436	2	27	1791.94	580969	24.4217	30.3932	PRTC01	SSAAPPPPPR	2	10	Label:13C(6)15N(4)@R	18	10	SSAAPPPPPr	5	18591	18600	0.805644	0.831766	0.62534	0.337838	0.724635	0.762512	0.552069	0.40888	29.8657	26.34	3.52575	4	0	MG132
761.368	41.0085	FLNA|1502_NADGTQTVNYVPSR_2	36.01	46.01	761.369	761.367	761.368	4923	2	27	2443.94	271736	39.335	45.2868	FLNA|1502	NADGTQTVNYVPSR	2	NA	NA	60	14	NADGTQTVNYVPSR	1	80309	80322	0.804091	0.786857	0.576586	-0.248186	0.799862	0.783407	0.57304	-0.195893	40.7323	41.01	-0.277681	4	0	MG132
558.326	56.6711	PRTC09_GLILVGGYGTR_2	51.67	61.67	558.327	558.325	558.326	9167	2	27	3577.2	237315	55.0034	60.9874	PRTC09	GLILVGGYGTR	2	11	Label:13C(6)15N(4)@R	29	11	GLILVGGYGTr	4	32698	32708	0.796335	0.817183	0.60893	0.755629	0.565919	0.604692	0.413407	0.459756	59.62	56.67	2.94998	4	0	MG132
695.832	45.6162	PRTC06_TASEFDSAIAQDK_2	40.62	50.62	695.833	695.831	695.832	5926	2	27	2704.61	2.74624e+06	43.6718	49.6608	PRTC06	TASEFDSAIAQDK	2	13	Label:13C(6)15N(2)@K	43	13	TASEFDSAIAQDk	12	49300	49312	0.791407	0.831217	0.62471	0.734477	0.870074	0.892121	0.701566	0.583858	45.0768	45.62	-0.543154	4	0	MG132
427.226	43.2527	CALR|18_EPAVYFK_2	38.25	48.25	427.227	427.225	427.226	5149	2	27	2504.75	1.54722e+06	41.7459	47.6926	CALR|18	EPAVYFK	2	NA	NA	1	7	EPAVYFK	7	0	6	0.768578	0.806423	0.597199	0.500435	0.780079	0.815331	0.60689	0.519565	41.7459	43.25	-1.50409	4	0	MG132
613.317	30.6463	PRTC02_GISNEGQNASIK_2	25.65	35.65	613.318	613.316	613.317	2749	2	27	1871.08	760232	28.8504	34.8115	PRTC02	GISNEGQNASIK	2	12	Label:13C(6)15N(2)@K	40	12	GISNEGQNASIk	9	45210	45221	0.746742	0.788128	0.577899	0.464341	0.573427	0.627171	0.431575	0.529105	31.1846	30.65	0.534647	4	0	MG132
422.736	38.5693	PRTC05_IGDYAGIK_2	33.57	43.57	422.737	422.735	422.736	4402	2	27	2303.45	2564600	36.7685	42.7044	PRTC05	IGDYAGIK	2	8	Label:13C(6)15N(2)@K	6	8	IGDYAGIk	8	4775	4782	0.744258	0.779358	0.56891	0.6341	0.179429	0.31244	0.202292	0.411877	38.3909	38.57	-0.179111	4	0	MG132
760.356	53.4877	BAX|66_IGDELDSNMELQR_2	48.49	58.49	760.357	760.356	760.356	7810	2	27	3209.27	163109	51.6707	57.6264	BAX|66	IGDELDSNMELQR	2	NA	NA	44	13	IGDELDSNMELQR	5	51520	51532	0.743574	0.765612	0.555128	0.0898827	0.731248	0.754861	0.544591	0.0897742	53.4878	53.49	-0.00223	4	0	MG132
628.299	27.7828	ERO1A|24_EEQPPETAAQR_2	22.78	32.78	628.3	628.298	628.299	1972	2	27	1673.26	283915	26.0332	32.004	ERO1A|24	EEQPPETAAQR	2	NA	NA	22	11	EEQPPETAAQR	2	23048	23058	0.706663	0.718297	0.510156	0.0747654	0.890445	0.885848	0.692845	-0.0741088	27.8877	27.78	0.107692	4	0	MG132
586.8	46.4127	PRTC07_SAAGAFGPELSR_2	41.41	51.41	586.801	586.799	586.8	6394	2	27	2827.62	1.48532e+06	44.7409	50.6953	PRTC07	SAAGAFGPELSR	2	12	Label:13C(6)15N(4)@R	32	12	SAAGAFGPELSr	11	33715	33726	0.68518	0.733559	0.524285	0.634109	0.345845	0.434182	0.285925	0.421705	47.127	46.41	0.717022	4	0	MG132
752.854	54.3255	HSP90B1|24_EVDVDGTVEEDLGK_2	49.33	59.33	752.855	752.853	752.854	8658	2	27	3440.87	1.57844e+06	52.4979	58.4939	HSP90B1|24	EVDVDGTVEEDLGK	2	NA	NA	57	14	EVDVDGTVEEDLGK	2	77215	77228	0.68429	0.689084	0.483974	0.069154	0.639492	0.6446	0.445952	-0.0594639	57.3479	54.33	3.01788	4	0	MG132
598.297	34.4875	ENG|26_RETVHCDLQPVGPER_3	29.49	39.49	598.298	598.296	598.297	3213	3	27	1992.72	495694	32.9162	38.8808	ENG|26	RETVHCDLQPVGPER	3	6	Carbamidomethyl@C	69	15	RETVHCDLQPVGPER	1	105917	105931	0.658285	0.657014	0.456361	-0.376282	0.821978	0.805877	0.596612	-0.415789	33.212	34.49	-1.27804	4	0	MG132
337.187	35.4809	CALR|18_REPAVYFK_3	30.48	40.48	337.188	337.186	337.187	3382	3	27	2035.53	227256	33.1831	39.152	CALR|18	REPAVYFK	3	NA	NA	3	8	REPAVYFK	2	2143	2150	0.651646	0.670113	0.467509	-0.201149	0.585422	0.614161	0.421011	0.0218938	33.9255	35.48	-1.55453	4	0	MG132
507.602	41.2944	SSBP1|17_RESETTTSLVLER_3	36.29	46.29	507.603	507.601	507.602	5939	3	27	2707.88	357584	39.3628	45.3217	SSBP1|17	RESETTTSLVLER	3	NA	NA	49	13	RESETTTSLVLER	1	61780	61792	0.644106	0.635765	0.43863	-0.354538	0.61643	0.612613	0.419763	-0.305688	45.1314	41.29	3.84135	4	0	MG132
758.338	44.9663	FBLN1|30_DVLLEACCADGHR_2	39.97	49.97	758.339	758.337	758.338	5653	2	27	2632.86	970501	43.0694	49.0268	FBLN1|30	DVLLEACCADGHR	2	7;8	Carbamidomethyl@C;Carbamidomethyl@C	53	13	DVLLEACCADGHR	3	67168	67180	0.631963	0.655702	0.455254	-0.242944	0.667343	0.688407	0.483379	-0.228072	43.881	44.97	-1.08896	4	0	MG132
554.272	47.8065	HSP90B1|24_REVDVDGTVEEDLGK_3	42.81	52.81	554.273	554.271	554.272	7208	3	27	3047.42	1.02172e+06	45.98	51.9234	HSP90B1|24	REVDVDGTVEEDLGK	3	NA	NA	68	15	REVDVDGTVEEDLGK	1	105329	105343	0.63066	0.625538	0.430241	-0.0873206	0.605321	0.600671	0.4102	-0.243336	50.7904	47.81	2.9804	4	0	MG132
594.299	39.5989	FKBP11|26_EAGLETESPVR_2	34.6	44.6	594.3	594.298	594.299	5411	2	27	2570.65	214300	37.786	43.7207	FKBP11|26	EAGLETESPVR	2	NA	NA	26	11	EAGLETESPVR	1	27068	27078	0.598722	0.60338	0.41236	-0.0605066	0.601302	0.60634	0.414726	-0.0605066	42.8442	39.6	3.24419	4	0	MG132
818.891	39.83	ENG|26_ETVHCDLQPVGPER_2	34.83	44.83	818.892	818.89	818.891	4572	2	27	2348.2	42169	38.2451	44.2241	ENG|26	ETVHCDLQPVGPER	2	5	Carbamidomethyl@C	58	14	ETVHCDLQPVGPER	1	78086	78099	0.575107	0.573982	0.389204	-0.344019	0.647589	0.637407	0.439986	-0.344019	39.1366	39.83	-0.693377	4	0	MG132
764.835	69.703	ATF4|76_EDAFSGTDWMLEK_2	64.7	74.7	764.836	764.834	764.835	12065	2	27	4383.87	2.25523e+06	68.076	74.0514	ATF4|76	EDAFSGTDWMLEK	2	NA	NA	42	13	EDAFSGTDWMLEK	2	48460	48472	0.552524	0.572335	0.387924	0.0286583	0.542741	0.562774	0.380532	0.0236648	73.0644	69.7	3.36444	4	0	MG132
329.53	27.6908	MTHFD2|36_REAVVISGR_3	22.69	32.69	329.531	329.529	329.53	1826	3	27	1636.65	260248	25.4733	31.4391	MTHFD2|36	REAVVISGR	3	NA	NA	10	9	REAVVISGR	1	8216	8224	0.5508	0.564073	0.381533	-0.206928	0.543374	0.557813	0.376719	-0.1261	27.2775	27.69	-0.412469	4	0	MG132
867.881	58.2026	HSP90B1|22_DDEVDVDGTVEEDLGK_2	53.2	63.2	867.882	867.88	867.881	9458	2	27	3655.55	376183	56.3397	62.3084	HSP90B1|22	DDEVDVDGTVEEDLGK	2	NA	NA	74	16	DDEVDVDGTVEEDLGK	1	122836	122851	0.496189	0.508617	0.339686	0.560767	0.373005	0.390517	0.255408	-0.195499	60.9259	58.2	2.72587	4	0	MG132
467.733	29.7107	CENPU|49_NSDVSSIGR_2	24.71	34.71	467.734	467.732	467.733	3089	2	27	1960.95	330196	27.8103	33.781	CENPU|49	NSDVSSIGR	2	NA	NA	11	9	NSDVSSIGR	1	10312	10320	0.481867	0.502422	0.335116	-0.218292	0.446961	0.471708	0.312724	-0.291606	32.6825	29.71	2.97249	4	0	MG132
776.86	67.1829	PDIA3|26_DVLELTDDNFESR_2	62.18	72.18	776.861	776.859	776.86	10578	2	27	3979.24	585702	65.448	71.4345	PDIA3|26	DVLELTDDNFESR	2	NA	NA	52	13	DVLELTDDNFESR	1	64672	64684	0.477893	0.489548	0.325676	-0.0811985	0.516666	0.523393	0.350668	-0.20305	66.3206	67.18	-0.859409	4	0	MG132
443.882	22.4798	TNFRSF12A|28_REQAPGTAPCSR_3	17.48	27.48	443.884	443.882	443.883	1538	3	27	1560.37	3177061	21.1847	27.1657	TNFRSF12A|28	REQAPGTAPCSR	3	10	Carbamidomethyl@C	33	12	REQAPGTAPCSR	1	37719	37730	0.447592	0.466449	0.308934	-0.320719	0.473567	0.489701	0.325788	-0.320719	26.0061	22.48	3.52613	4	0	MG132
448.569	33.1905	FKBP11|26_REAGLETESPVR_3	28.19	38.19	448.57	448.568	448.569	2838	3	27	1894.42	471816	31.074	37.0552	FKBP11|26	REAGLETESPVR	3	NA	NA	39	12	REAGLETESPVR	1	42702	42713	0.422282	0.440893	0.290676	-0.326779	0.414267	0.434347	0.286042	-0.320719	31.5737	33.19	-1.61626	4	0	MG132
557.299	44.2714	PLA2R1|21_EGVAAALTPER_2	39.27	49.27	557.3	557.298	557.299	6007	2	27	2725.72	234766	42.4305	48.3854	PLA2R1|21	EGVAAALTPER	2	NA	NA	23	11	EGVAAALTPER	1	24868	24878	0.385054	0.410204	0.269085	-0.14137	0.387702	0.412607	0.270763	-0.209756	45.4287	44.27	1.15871	4	0	MG132
605.827	72.7819	BCL2|130_FATVVEELFR_2	67.78	77.78	605.828	605.826	605.827	11646	2	27	4273.33	1830861	70.8869	76.8593	BCL2|130	FATVVEELFR	2	NA	NA	16	10	FATVVEELFR	1	14739	14748	0.371617	0.402204	0.263512	-0.281853	0.330131	0.365673	0.238323	-0.22278	71.2222	72.78	-1.55776	4	0	MG132
557.928	36.8535	FBLN1|30_RDVLLEACCADGHR_3	31.85	41.85	557.929	557.927	557.928	4001	3	27	2196.04	896702	34.885	40.8459	FBLN1|30	RDVLLEACCADGHR	3	8;9	Carbamidomethyl@C;Carbamidomethyl@C	64	14	RDVLLEACCADGHR	1	90644	90657	0.340898	0.361777	0.23566	-0.516136	0.373044	0.390944	0.255702	-0.507428	36.6007	36.85	-0.24932	4	0	MG132
520.925	34.7462	CPSF7|33_RDVLTATSQPSDDR_3	29.75	39.75	520.926	520.924	520.925	3080	3	27	1958.5	3.16122e+06	32.5567	38.5163	CPSF7|33	RDVLTATSQPSDDR	3	NA	NA	61	14	RDVLTATSQPSDDR	2	81726	81739	0.287424	0.33272	0.215933	-0.258815	0.277471	0.322665	0.209157	-0.212328	32.6417	34.75	-2.10826	4	0	MG132
496.295	48.7357	ERN1|280_LTPTLYVGK_2	43.74	53.74	496.296	496.294	496.295	6952	2	27	2977.32	285025	47.0135	52.9878	ERN1|280	LTPTLYVGK	2	NA	NA	14	9	LTPTLYVGK	2	12600	12608	0.281599	0.348076	0.22633	-0.0976906	0.513478	0.548648	0.369715	-0.00513196	49.6219	48.74	0.881944	4	0	MG132
794.019	50.9195	EIF4B|46_RDLEGDVSTTWHSNDDDVYR_3	45.92	55.92	794.02	794.018	794.019	7711	3	27	3182.71	161690	48.8213	54.805	EIF4B|46	RDLEGDVSTTWHSNDDDVYR	3	NA	NA	83	20	RDLEGDVSTTWHSNDDDVYR	1	137176	137195	0.221733	0.247678	0.159335	-0.156801	0.231577	0.256561	0.165179	-0.269979	53.0451	50.92	2.12511	4	0	MG132
364.519	25.9378	CENPU|49_RDSDVSSIGR_3	20.94	30.94	364.521	364.519	364.519	1791	3	27	1627.24	356051	23.9479	29.9076	CENPU|49	RDSDVSSIGR	3	NA	NA	19	10	RDSDVSSIGR	1	19752	19761	0.2163	0.259267	0.166962	-0.22278	0.211862	0.254933	0.164107	-0.213771	27.1206	25.94	1.1806	4	0	MG132
630.957	51.6242	HSP90B1|22_RDDEVDVDGTVEEDLGK_3	46.62	56.62	630.958	630.956	630.957	7107	3	27	3019.83	1.44991e+06	49.8832	55.8667	HSP90B1|22	RDDEVDVDGTVEEDLGK	3	NA	NA	77	17	RDDEVDVDGTVEEDLGK	2	125775	125791	0.198727	0.244976	0.15756	-0.186676	0.203048	0.251369	0.161762	-0.281479	50.3305	51.62	-1.2895	4	0	MG132
560.276	37.7312	FLNA|1502_RDADGTQTVNYVPSR_3	32.73	42.73	560.277	560.275	560.276	4901	3	27	2437.83	230293	35.8494	41.8284	FLNA|1502	RDADGTQTVNYVPSR	3	NA	NA	70	15	RDADGTQTVNYVPSR	1	110131	110145	0.192487	0.22898	0.147078	-0.3838	0.189727	0.225742	0.144961	-0.297642	40.6306	37.73	2.90056	4	0	MG132
584.304	60.3621	P4HA3|29_DTFSALTSVAR_2	55.36	65.36	584.305	584.303	584.304	9230	2	27	3593.97	960682	58.6159	64.5946	P4HA3|29	DTFSALTSVAR	2	NA	NA	27	11	DTFSALTSVAR	1	27638	27648	0.183759	0.232032	0.149075	-0.163321	0.16262	0.212867	0.13656	-0.231707	59.8994	60.36	-0.460576	4	0	MG132
607.616	43.539	TMEM59|36_REAFDSVLGDTASCHR_3	38.54	48.54	607.617	607.615	607.616	6411	3	27	2831.66	542747	41.4318	47.3999	TMEM59|36	REAFDSVLGDTASCHR	3	14	Carbamidomethyl@C	75	16	REAFDSVLGDTASCHR	1	125461	125476	0.165885	0.203921	0.130737	-0.452931	0.162548	0.199956	0.12816	-0.423479	47.1944	43.54	3.65441	4	0	MG132
570.276	58.136	PDIA3|26_RDVLELTDDNFESR_3	53.14	63.14	570.277	570.275	570.276	8814	3	27	3484.59	505783	56.2776	62.2424	PDIA3|26	RDVLELTDDNFESR	3	NA	NA	65	14	RDVLELTDDNFESR	1	93062	93075	0.15587	0.19813	0.126974	-0.269956	0.175039	0.215438	0.138236	-0.361436	58.0765	58.14	-0.063518	4	0	MG132
542.269	42.9302	CASP3|29_SGISLDNSYK_2	37.93	47.93	542.27	542.269	542.269	6085	2	27	2746.93	1.02247e+06	41.2396	47.2081	CASP3|29	SGISLDNSYK	2	NA	NA	15	10	SGISLDNSYK	2	14334	14343	0.124461	0.199052	0.127572	-0.0703989	0.111838	0.188046	0.120431	-0.0794079	45.7821	42.93	2.85213	4	0	MG132
590.614	17.8991	SHMT2|27_REHSNAAQTQTGEANR_3	12.9	22.9	590.615	590.613	590.614	306	3	27	1191.44	19920.2	18.0367	24.0331	SHMT2|27	REHSNAAQTQTGEANR	3	NA	NA	73	16	REHSNAAQTQTGEANR	1	116386	116401	0.105216	0.145643	0.0930499	0.0507919	0.0248059	0.0818596	0.0521718	-0.452987	19.8574	17.9	1.95739	4	0	MG132
702.834	41.5014	CPSF7|33_DVLTATSQPSDDR_2	36.5	46.5	702.835	702.833	702.834	6001	2	27	2724.1	254550	39.7114	45.6816	CPSF7|33	DVLTATSQPSDDR	2	NA	NA	46	13	DVLTATSQPSDDR	1	57160	57172	0.0684206	0.12287	0.0784196	-0.0504234	0.0548874	0.111019	0.0708226	-0.238765	45.4016	41.5	3.90161	4	0	MG132
832.87	52.702	TMEM59|36_EAFDSVLGDTASCHR_2	47.7	57.7	832.871	832.869	832.87	8396	2	27	3369.45	392458	50.8175	56.8131	TMEM59|36	EAFDSVLGDTASCHR	2	13	Carbamidomethyl@C	66	15	EAFDSVLGDTASCHR	1	96985	96999	0.0603492	0.103684	0.0661262	-0.398838	0.101115	0.140629	0.0898249	-0.305161	56.1576	52.7	3.45757	4	0	MG132
681.355	58.8019	LSM3|7_REQQTTNTVEEPLDLIR_3	53.8	63.8	681.356	681.354	681.355	9035	3	27	3543.65	965305	56.786	62.7625	LSM3|7	REQQTTNTVEEPLDLIR	3	NA	NA	78	17	REQQTTNTVEEPLDLIR	1	129695	129711	0.0534922	0.0992866	0.0633122	-0.421589	0.0583611	0.10242	0.0653172	-0.384959	59.0608	58.8	0.260785	4	0	MG132
559.957	43.3358	P4HB|18_RDAPEEEDHVLVLR_3	38.34	48.34	559.958	559.956	559.957	5621	3	27	2624.42	592442	41.2948	47.2699	P4HB|18	RDAPEEEDHVLVLR	3	NA	NA	55	14	RDAPEEEDHVLVLR	1	71651	71664	0.0365332	0.0960114	0.061217	-0.550969	0.0460727	0.100686	0.0642073	-0.50636	43.7403	43.34	0.400277	4	0	MG132
576.587	27.2043	IGFBP4|22_RDEAIHCPPCSEEK_3	22.2	32.2	576.588	576.586	576.587	2343	3	27	1768.69	161083	25.1967	31.1576	IGFBP4|22	RDEAIHCPPCSEEK	3	7;10	Carbamidomethyl@C;Carbamidomethyl@C	62	14	RDEAIHCPPCSEEK	1	85535	85548	0.00408855	0.0568157	0.0361896	-0.0683855	0.0421201	0.0916337	0.0584178	-0.291727	29.4781	27.2	2.27814	4	0	MG132
786.327	31.4927	IGFBP4|22_DEAIHCPPCSEEK_2	26.49	36.49	786.328	786.326	786.327	2361	2	27	1773.34	232513	29.5557	35.5265	IGFBP4|22	DEAIHCPPCSEEK	2	6;9	Carbamidomethyl@C;Carbamidomethyl@C	54	13	DEAIHCPPCSEEK	0	68800	68812	0	0	0	0.0935193	0	0	0	-0.317846	29.5557	31.49	-1.93435	4	0	MG132
806.875	19.0125	SHMT2|27_QHSNAAQTQTGEANR_2	14.01	24.01	806.876	806.874	806.875	83	2	27	1117.24	12205.1	18.6207	24.5927	SHMT2|27	QHSNAAQTQTGEANR	2	NA	NA	67	15	QHSNAAQTQTGEANR	0	97307	97321	0	0	0	0.434211	0	0	0	-0.346719	18.6207	19.01	-0.389272	4	0	MG132
848.393	68.08	UQCRHL|15_RDPEEEEEEEEELVDPLTTVR_3	63.08	73.08	848.394	848.392	848.393	10628	3	27	3994.02	377169	66.567	72.557	UQCRHL|15	RDPEEEEEEEEELVDPLTTVR	3	NA	NA	84	21	RDPEEEEEEEEELVDPLTTVR	0	138259	138279	0	0	0	0.238514	0	0	0	-0.429372	66.567	68.08	-1.51296	4	0	MG132
745.392	59.9233	PRTC11_SFANQPLEVVYSK_2	54.92	64.92	745.393	745.391	745.392	9134	2	27	3550.33	23145090	58.1416	64.1325	PRTC11	SFANQPLEVVYSK	2	13	Label:13C(6)15N(2)@K	45	13	SFANQPLEVVYSk	17	53966	53978	0.988281	0.990081	0.910259	0.808239	0.96477	0.970176	0.84413	0.675749	59.1721	59.92	-0.747853	5	0	MGTG
836.415	69.2789	SQSTM1|421_NYDIGAALDTIQYSK_2	64.28	74.28	836.416	836.414	836.415	11388	2	27	4182.1	8214096	67.4771	73.4594	SQSTM1|421	NYDIGAALDTIQYSK	2	NA	NA	71	15	NYDIGAALDTIQYSK	18	112416	112430	0.9872	0.989106	0.905945	0.825188	0.984197	0.986532	0.895398	0.813841	69.7017	69.28	0.421724	5	0	MGTG
773.895	53.205	PRTC08_ELGQSGVDTYLQTK_2	48.21	58.21	773.896	773.894	773.895	7712	2	27	3167.91	6.65113e+06	51.4293	57.4052	PRTC08	ELGQSGVDTYLQTK	2	14	Label:13C(6)15N(2)@K	56	14	ELGQSGVDTYLQTk	16	73726	73739	0.983084	0.986028	0.893457	0.75476	0.908503	0.925007	0.751882	0.794758	52.7986	53.21	-0.411432	5	0	MGTG
787.421	72.8278	PRTC15_LSSEAPALFQFDLK_2	67.83	77.83	787.422	787.42	787.421	12160	2	27	4385.68	15220278	71.0764	77.0607	PRTC15	LSSEAPALFQFDLK	2	14	Label:13C(6)15N(2)@K	63	14	LSSEAPALFQFDLk	16	87623	87636	0.975369	0.977763	0.865495	0.45394	0.945484	0.950106	0.798051	0.249552	73.0946	72.83	0.264638	5	0	MGTG
761.381	51.6026	P4HB|18_DAPEEEDHVLVLR_2	46.6	56.6	761.382	761.38	761.381	7115	2	27	3009.49	377943	49.7358	55.7087	P4HB|18	DAPEEEDHVLVLR	2	NA	NA	51	13	DAPEEEDHVLVLR	11	62474	62486	0.957018	0.961789	0.823443	0.636778	0.867953	0.878397	0.682774	0.32767	50.1582	51.6	-1.44182	5	0	MGTG
682.849	48.3756	SSBP1|17_ESETTTSLVLER_2	43.38	53.38	682.85	682.848	682.849	6526	2	27	2850.14	1.4175e+06	46.6018	52.5831	SSBP1|17	ESETTTSLVLER	2	NA	NA	34	12	ESETTTSLVLER	11	38664	38675	0.9508	0.959559	0.818331	0.819662	0.943282	0.953596	0.805301	0.819662	47.5023	48.38	-0.877701	5	0	MGTG
451.283	34.9206	PRTC04_DIPVPKPK_2	29.92	39.92	451.284	451.282	451.283	4132	2	27	2221.51	115662	33.0623	39.0287	PRTC04	DIPVPKPK	2	8	Label:13C(6)15N(2)@K	2	8	DIPVPKPk	4	1617	1624	0.950674	0.955952	0.810345	0.391626	0.942917	0.949861	0.797552	0.392173	37.0252	34.92	2.10517	5	0	MGTG
680.374	71.767	PRTC14_ELASGLSFPVGFK_2	66.77	76.77	680.375	680.372	680.373	12129	2	27	4377.35	1.77714e+06	69.9302	75.8853	PRTC14	ELASGLSFPVGFK	2	13	Label:13C(6)15N(2)@K	48	13	ELASGLSFPVGFk	11	58910	58922	0.933076	0.941197	0.780594	0.607957	0.944295	0.952159	0.802284	0.685899	72.9558	71.77	1.18582	5	0	MGTG
587.269	26.2323	TNFRSF12A|28_EQAPGTAPCSR_2	21.23	31.23	587.27	587.269	587.269	1483	2	27	1543.34	1.10778e+06	24.5161	30.4983	TNFRSF12A|28	EQAPGTAPCSR	2	9	Carbamidomethyl@C	28	11	EQAPGTAPCSR	6	30106	30116	0.92846	0.93182	0.76356	0.535178	0.948585	0.951301	0.800504	0.453752	25.7223	26.23	-0.507692	5	0	MGTG
801.411	60.0386	PRTC10_GILFVGSGVSGGEEGAR_2	55.04	65.04	801.412	801.41	801.411	9218	2	27	3572.09	1.00878e+06	58.3164	64.2958	PRTC10	GILFVGSGVSGGEEGAR	2	17	Label:13C(6)15N(4)@R	79	17	GILFVGSGVSGGEEGAr	14	132860	132876	0.927432	0.93434	0.76802	0.556616	0.62901	0.66718	0.464998	0.427564	59.5348	60.04	-0.505159	5	0	MGTG
498.802	63.8572	PRTC12_LTILEELR_2	58.86	68.86	498.803	498.801	498.802	10325	2	27	3876.29	110945	61.9229	67.8792	PRTC12	LTILEELR	2	8	Label:13C(6)15N(4)@R	7	8	LTILEELr	7	6461	6468	0.904307	0.925575	0.752836	0.65052	0.685974	0.737265	0.527766	0.302135	64.6048	63.86	0.744785	5	0	MGTG
573.302	67.5684	PRTC13_NGFILDGFPR_2	62.57	72.57	573.303	573.301	573.302	11301	2	27	4158.11	69901.5	65.8381	71.8109	PRTC13	NGFILDGFPR	2	10	Label:13C(6)15N(4)@R	20	10	NGFILDGFPr	6	21930	21939	0.883974	0.901199	0.714624	0.634106	0.556095	0.590526	0.402159	0.370528	69.3019	67.57	1.73186	5	0	MGTG
496.287	29.929	PRTC03_HVLTSIGEK_2	24.93	34.93	496.288	496.286	496.287	3205	2	27	1982.21	1.17254e+06	27.9598	33.9198	PRTC03	HVLTSIGEK	2	9	Label:13C(6)15N(2)@K	13	9	HVLTSIGEk	2	11834	11842	0.869695	0.87065	0.672602	0.213526	0.925438	0.926554	0.754487	-0.126283	33.0368	29.93	3.10682	5	0	MGTG
758.338	44.9663	FBLN1|30_DVLLEACCADGHR_2	39.97	49.97	758.339	758.337	758.338	5666	2	27	2624.95	530591	43.082	49.0404	FBLN1|30	DVLLEACCADGHR	2	7;8	Carbamidomethyl@C;Carbamidomethyl@C	53	13	DVLLEACCADGHR	5	67634	67646	0.867487	0.875217	0.678563	-0.0550911	0.853523	0.866051	0.666699	-0.0740881	43.7492	44.97	-1.22078	5	0	MGTG
471.236	24.3151	ERO1A|24_REEQPPETAAQR_3	19.32	29.32	471.237	471.235	471.236	1208	3	27	1469.81	472798	22.8265	28.8081	ERO1A|24	REEQPPETAAQR	3	NA	NA	37	12	REEQPPETAAQR	1	41370	41381	0.828194	0.81346	0.604838	-0.314658	0.827076	0.814501	0.605978	-0.366032	24.4969	24.32	0.176861	5	0	MGTG
761.368	41.0085	FLNA|1502_NADGTQTVNYVPSR_2	36.01	46.01	761.369	761.367	761.368	4936	2	27	2437.63	204816	39.3357	45.2991	FLNA|1502	NADGTQTVNYVPSR	2	NA	NA	60	14	NADGTQTVNYVPSR	1	80811	80824	0.804091	0.786857	0.576586	-0.248186	0.799862	0.783407	0.57304	-0.195893	40.6271	41.01	-0.382906	5	0	MGTG
695.832	45.6162	PRTC06_TASEFDSAIAQDK_2	40.62	50.62	695.833	695.831	695.832	5843	2	27	2671.73	1.97244e+06	43.6828	49.6422	PRTC06	TASEFDSAIAQDK	2	13	Label:13C(6)15N(2)@K	43	13	TASEFDSAIAQDk	14	49562	49574	0.78981	0.830738	0.624163	0.605894	0.863959	0.887257	0.694784	0.454841	44.5289	45.62	-1.0911	5	0	MGTG
760.356	53.4877	BAX|66_IGDELDSNMELQR_2	48.49	58.49	760.357	760.356	760.356	7848	2	27	3203.65	199608	51.6732	57.6267	BAX|66	IGDELDSNMELQR	2	NA	NA	44	13	IGDELDSNMELQR	3	51890	51902	0.786457	0.785822	0.57552	-0.106003	0.774092	0.774576	0.564073	-0.106003	53.3941	53.49	-0.095886	5	0	MGTG
558.326	56.6711	PRTC09_GLILVGGYGTR_2	51.67	61.67	558.327	558.325	558.326	8914	2	27	3493.85	4.09648e+06	55.003	60.9816	PRTC09	GLILVGGYGTR	2	11	Label:13C(6)15N(4)@R	29	11	GLILVGGYGTr	4	32606	32616	0.784332	0.805537	0.596246	0.755629	0.524552	0.56597	0.382996	0.459756	58.2308	56.67	1.56078	5	0	MGTG
415.74	33.151	MTHFD2|36_EAVVISGR_2	28.15	38.15	415.741	415.739	415.74	3009	2	27	1930.96	609952	31.27	37.2474	MTHFD2|36	EAVVISGR	2	NA	NA	4	8	EAVVISGR	5	3444	3451	0.783753	0.821492	0.613716	0.456486	0.790704	0.827131	0.620057	0.456486	32.1827	33.15	-0.967313	5	0	MGTG
493.768	26.3416	PRTC01_SSAAPPPPPR_2	21.34	31.34	493.769	493.767	493.768	2372	2	27	1769.06	3.84422e+06	24.4135	30.3966	PRTC01	SSAAPPPPPR	2	10	Label:13C(6)15N(4)@R	18	10	SSAAPPPPPr	4	18636	18645	0.773047	0.797549	0.58774	0.206178	0.744623	0.773613	0.563105	0.532561	29.4843	26.34	3.14428	5	0	MGTG
427.226	43.2527	CALR|18_EPAVYFK_2	38.25	48.25	427.227	427.225	427.226	5196	2	27	2505.59	1.74777e+06	41.7112	47.7048	CALR|18	EPAVYFK	2	NA	NA	1	7	EPAVYFK	5	6	12	0.770768	0.807396	0.598248	0.767826	0.7824	0.816543	0.608225	0.787826	41.7599	43.25	-1.49015	5	0	MGTG
507.602	41.2944	SSBP1|17_RESETTTSLVLER_3	36.29	46.29	507.603	507.601	507.602	5940	3	27	2696.83	226242	39.3589	45.3386	SSBP1|17	RESETTTSLVLER	3	NA	NA	49	13	RESETTTSLVLER	2	62198	62210	0.754421	0.752739	0.542535	-0.239796	0.732032	0.734423	0.525094	-0.190947	44.9471	41.29	3.65709	5	0	MGTG
613.317	30.6463	PRTC02_GISNEGQNASIK_2	25.65	35.65	613.318	613.316	613.317	2737	2	27	1859.67	1.44633e+06	28.8468	34.8	PRTC02	GISNEGQNASIK	2	12	Label:13C(6)15N(2)@K	40	12	GISNEGQNASIk	11	45550	45561	0.747218	0.791084	0.580966	0.631572	0.558798	0.616014	0.422507	0.370754	30.9945	30.65	0.344539	5	0	MGTG
422.736	38.5693	PRTC05_IGDYAGIK_2	33.57	43.57	422.737	422.735	422.736	4336	2	27	2276.13	3.25108e+06	36.7618	42.7081	PRTC05	IGDYAGIK	2	8	Label:13C(6)15N(2)@K	6	8	IGDYAGIk	8	4718	4725	0.744333	0.780434	0.570004	0.6341	0.192638	0.325114	0.210805	0.411877	37.9355	38.57	-0.634548	5	0	MGTG
628.299	27.7828	ERO1A|24_EEQPPETAAQR_2	22.78	32.78	628.3	628.298	628.299	1965	2	27	1665.82	821649	26.0348	32.0063	ERO1A|24	EEQPPETAAQR	2	NA	NA	22	11	EEQPPETAAQR	3	23226	23236	0.723247	0.738713	0.529132	0.202814	0.946847	0.942035	0.78218	0.0614446	27.7636	27.78	-0.016396	5	0	MGTG
586.8	46.4127	PRTC07_SAAGAFGPELSR_2	41.41	51.41	586.801	586.799	586.8	6440	2	27	2827.57	2.19016e+06	44.7411	50.6814	PRTC07	SAAGAFGPELSR	2	12	Label:13C(6)15N(4)@R	32	12	SAAGAFGPELSr	12	34033	34044	0.696232	0.739416	0.529797	0.569274	0.342097	0.42631	0.280373	0.32234	47.1262	46.41	0.716195	5	0	MGTG
752.854	54.3255	HSP90B1|24_EVDVDGTVEEDLGK_2	49.33	59.33	752.855	752.853	752.854	8679	2	27	3429.55	2.17806e+06	52.5197	58.4755	HSP90B1|24	EVDVDGTVEEDLGK	2	NA	NA	57	14	EVDVDGTVEEDLGK	3	77691	77704	0.677041	0.697141	0.49109	0.171732	0.59644	0.624312	0.429241	0.0389311	57.1592	54.33	2.82919	5	0	MGTG
598.297	34.4875	ENG|26_RETVHCDLQPVGPER_3	29.49	39.49	598.298	598.296	598.297	3202	3	27	1981.21	906406	32.92	38.8919	ENG|26	RETVHCDLQPVGPER	3	6	Carbamidomethyl@C	69	15	RETVHCDLQPVGPER	1	106508	106522	0.658285	0.657014	0.456361	-0.376282	0.821978	0.805877	0.596612	-0.415789	33.0202	34.49	-1.46976	5	0	MGTG
554.272	47.8065	HSP90B1|24_REVDVDGTVEEDLGK_3	42.81	52.81	554.273	554.271	554.272	6668	3	27	2888.31	87805.5	45.9476	51.9196	HSP90B1|24	REVDVDGTVEEDLGK	3	NA	NA	68	15	REVDVDGTVEEDLGK	1	104702	104716	0.63066	0.625538	0.430241	-0.0873206	0.605321	0.600671	0.4102	-0.243336	48.1385	47.81	0.328526	5	0	MGTG
681.355	58.8019	LSM3|7_REQQTTNTVEEPLDLIR_3	53.8	63.8	681.356	681.354	681.355	9449	3	27	3633.88	1201959	56.794	62.7654	LSM3|7	REQQTTNTVEEPLDLIR	3	NA	NA	78	17	REQQTTNTVEEPLDLIR	1	131164	131180	0.610216	0.603986	0.412844	-0.395627	0.606248	0.602154	0.411381	-0.358997	60.5646	58.8	1.76463	5	0	MGTG
594.299	39.5989	FKBP11|26_EAGLETESPVR_2	34.6	44.6	594.3	594.298	594.299	5394	2	27	2554.94	357108	37.7647	43.7336	FKBP11|26	EAGLETESPVR	2	NA	NA	26	11	EAGLETESPVR	1	27246	27256	0.598722	0.60338	0.41236	-0.0605066	0.601302	0.60634	0.414726	-0.0605066	42.5823	39.6	2.98226	5	0	MGTG
337.187	35.4809	CALR|18_REPAVYFK_3	30.48	40.48	337.188	337.186	337.187	3339	3	27	2015.83	276558	33.1767	39.1719	CALR|18	REPAVYFK	3	NA	NA	3	8	REPAVYFK	1	2100	2107	0.576975	0.58882	0.400815	-0.35769	0.511381	0.532973	0.357851	-0.134647	33.5971	35.48	-1.88287	5	0	MGTG
818.891	39.83	ENG|26_ETVHCDLQPVGPER_2	34.83	44.83	818.892	818.89	818.891	4554	2	27	2333.05	92872.5	38.2547	44.1859	ENG|26	ETVHCDLQPVGPER	2	5	Carbamidomethyl@C	58	14	ETVHCDLQPVGPER	1	78523	78536	0.575107	0.573982	0.389204	-0.344019	0.647589	0.637407	0.439986	-0.344019	38.8841	39.83	-0.945856	5	0	MGTG
329.53	27.6908	MTHFD2|36_REAVVISGR_3	22.69	32.69	329.531	329.529	329.53	1782	3	27	1620.33	758548	25.4889	31.4416	MTHFD2|36	REAVVISGR	3	NA	NA	10	9	REAVVISGR	1	8194	8202	0.550791	0.564065	0.381527	-0.218292	0.543374	0.557813	0.376719	-0.137463	27.0055	27.69	-0.684483	5	0	MGTG
607.616	43.539	TMEM59|36_REAFDSVLGDTASCHR_3	38.54	48.54	607.617	607.615	607.616	5769	3	27	2651.62	538327	41.4525	47.4073	TMEM59|36	REAFDSVLGDTASCHR	3	14	Carbamidomethyl@C	75	16	REAFDSVLGDTASCHR	1	125129	125144	0.539677	0.538926	0.362339	-0.439817	0.532764	0.534776	0.359208	-0.403807	44.1937	43.54	0.65374	5	0	MGTG
570.276	58.136	PDIA3|26_RDVLELTDDNFESR_3	53.14	63.14	570.277	570.275	570.276	9023	3	27	3522.75	899977	56.2843	62.2538	PDIA3|26	RDVLELTDDNFESR	3	NA	NA	65	14	RDVLELTDDNFESR	2	93915	93928	0.52561	0.550229	0.370919	-0.198156	0.503118	0.530156	0.355733	-0.311406	58.7126	58.14	0.572559	5	0	MGTG
448.569	33.1905	FKBP11|26_REAGLETESPVR_3	28.19	38.19	448.57	448.568	448.569	3912	3	27	2163.51	1.97894e+06	31.0857	37.0407	FKBP11|26	REAGLETESPVR	3	NA	NA	39	12	REAGLETESPVR	1	44582	44593	0.514834	0.522799	0.350224	-0.314658	0.524344	0.532346	0.357379	-0.314658	36.0585	33.19	2.86848	5	0	MGTG
867.881	58.2026	HSP90B1|22_DDEVDVDGTVEEDLGK_2	53.2	63.2	867.882	867.88	867.881	9834	2	27	3737.47	215591	56.3464	62.3221	HSP90B1|22	DDEVDVDGTVEEDLGK	2	NA	NA	74	16	DDEVDVDGTVEEDLGK	1	124184	124199	0.496189	0.508617	0.339686	0.560767	0.373005	0.390517	0.255408	-0.195499	62.2911	58.2	4.09111	5	0	MGTG
467.733	29.7107	CENPU|49_NSDVSSIGR_2	24.71	34.71	467.734	467.732	467.733	2664	2	27	1840.1	986064	27.7872	33.7621	CENPU|49	NSDVSSIGR	2	NA	NA	11	9	NSDVSSIGR	1	9850	9858	0.481867	0.502422	0.335116	-0.218292	0.446961	0.471708	0.312724	-0.291606	30.6683	29.71	0.958314	5	0	MGTG
776.86	67.1829	PDIA3|26_DVLELTDDNFESR_2	62.18	72.18	776.861	776.859	776.86	10579	2	27	3956.69	2.42587e+06	65.4532	71.4275	PDIA3|26	DVLELTDDNFESR	2	NA	NA	52	13	DVLELTDDNFESR	1	64922	64934	0.477893	0.489548	0.325676	-0.0811985	0.516666	0.523393	0.350668	-0.20305	65.9448	67.18	-1.23521	5	0	MGTG
443.882	22.4798	TNFRSF12A|28_REQAPGTAPCSR_3	17.48	27.48	443.884	443.882	443.883	1547	3	27	1560.47	2.61506e+06	21.1945	27.1611	TNFRSF12A|28	REQAPGTAPCSR	3	10	Carbamidomethyl@C	33	12	REQAPGTAPCSR	1	38048	38059	0.447592	0.466449	0.308934	-0.320719	0.473567	0.489701	0.325788	-0.320719	26.0078	22.48	3.52778	5	0	MGTG
764.835	69.703	ATF4|76_EDAFSGTDWMLEK_2	64.7	74.7	764.836	764.834	764.835	11200	2	27	4129.89	1051550	68.0754	74.0334	ATF4|76	EDAFSGTDWMLEK	2	NA	NA	42	13	EDAFSGTDWMLEK	1	47162	47174	0.446745	0.461925	0.305682	-0.0811985	0.451673	0.465439	0.308207	-0.0811985	68.8314	69.7	-0.868564	5	0	MGTG
584.304	60.3621	P4HA3|29_DTFSALTSVAR_2	55.36	65.36	584.305	584.303	584.304	9768	2	27	3719.79	372154	58.6291	64.5906	P4HA3|29	DTFSALTSVAR	2	NA	NA	27	11	DTFSALTSVAR	1	28496	28506	0.414464	0.437352	0.288167	-0.14137	0.405503	0.42952	0.282635	-0.217073	61.9965	60.36	1.63649	5	0	MGTG
605.827	72.7819	BCL2|130_FATVVEELFR_2	67.78	77.78	605.828	605.826	605.827	11706	2	27	4265.74	7.22366e+06	70.8785	76.8643	BCL2|130	FATVVEELFR	2	NA	NA	16	10	FATVVEELFR	1	14811	14820	0.371617	0.402204	0.263512	-0.281853	0.330131	0.365673	0.238323	-0.22278	71.0957	72.78	-1.6843	5	0	MGTG
557.928	36.8535	FBLN1|30_RDVLLEACCADGHR_3	31.85	41.85	557.929	557.927	557.928	3986	3	27	2183.11	366564	34.9044	40.8704	FBLN1|30	RDVLLEACCADGHR	3	8;9	Carbamidomethyl@C;Carbamidomethyl@C	64	14	RDVLLEACCADGHR	1	91146	91159	0.340898	0.361777	0.23566	-0.516136	0.373044	0.390944	0.255702	-0.507428	36.3851	36.85	-0.464863	5	0	MGTG
630.957	51.6242	HSP90B1|22_RDDEVDVDGTVEEDLGK_3	46.62	56.62	630.958	630.956	630.957	7089	3	27	3002.45	2.0085e+06	49.8836	55.8638	HSP90B1|22	RDDEVDVDGTVEEDLGK	3	NA	NA	77	17	RDDEVDVDGTVEEDLGK	1	126364	126380	0.285314	0.308985	0.199979	-0.0986723	0.293722	0.317049	0.205384	-0.193475	50.0408	51.62	-1.57918	5	0	MGTG
496.295	48.7357	ERN1|280_LTPTLYVGK_2	43.74	53.74	496.296	496.294	496.295	7514	2	27	3116.13	418568	47.0188	52.962	ERN1|280	LTPTLYVGK	2	NA	NA	14	9	LTPTLYVGK	2	13266	13274	0.281163	0.34643	0.225213	-0.0976906	0.51502	0.548577	0.36966	-0.00513196	51.9355	48.74	3.19546	5	0	MGTG
702.834	41.5014	CPSF7|33_DVLTATSQPSDDR_2	36.5	46.5	702.835	702.833	702.834	5874	2	27	2679.67	496780	39.7143	45.6916	CPSF7|33	DVLTATSQPSDDR	2	NA	NA	46	13	DVLTATSQPSDDR	1	57434	57446	0.268845	0.302193	0.195437	-0.0300152	0.270113	0.303366	0.196221	-0.218356	44.6611	41.5	3.16114	5	0	MGTG
364.519	25.9378	CENPU|49_RDSDVSSIGR_3	20.94	30.94	364.521	364.519	364.519	1859	3	27	1640.37	1325200	23.9463	29.9215	CENPU|49	RDSDVSSIGR	3	NA	NA	19	10	RDSDVSSIGR	2	19977	19986	0.265716	0.318888	0.206619	-0.0915058	0.258177	0.311682	0.201785	-0.0824968	27.3395	25.94	1.39953	5	0	MGTG
520.925	34.7462	CPSF7|33_RDVLTATSQPSDDR_3	29.75	39.75	520.926	520.924	520.925	3100	3	27	1954.64	4.24345e+06	32.5485	38.5297	CPSF7|33	RDVLTATSQPSDDR	3	NA	NA	61	14	RDVLTATSQPSDDR	1	82254	82267	0.257801	0.288584	0.186369	-0.348374	0.289306	0.317235	0.205509	-0.301887	32.5773	34.75	-2.17269	5	0	MGTG
786.327	31.4927	IGFBP4|22_DEAIHCPPCSEEK_2	26.49	36.49	786.328	786.326	786.327	3453	2	27	2044.28	365162	29.5784	35.5156	IGFBP4|22	DEAIHCPPCSEEK	2	6;9	Carbamidomethyl@C;Carbamidomethyl@C	54	13	DEAIHCPPCSEEK	1	70922	70934	0.239671	0.273811	0.176568	0.198111	0.2203	0.258299	0.166324	-0.213254	34.0714	31.49	2.5814	5	0	MGTG
794.019	50.9195	EIF4B|46_RDLEGDVSTTWHSNDDDVYR_3	45.92	55.92	794.02	794.018	794.019	7529	3	27	3119.68	2.46509e+06	48.8272	54.8026	EIF4B|46	RDLEGDVSTTWHSNDDDVYR	3	NA	NA	83	20	RDLEGDVSTTWHSNDDDVYR	1	137473	137492	0.238875	0.263318	0.169634	-0.154751	0.26558	0.287671	0.185762	-0.267929	51.9947	50.92	1.07468	5	0	MGTG
560.276	37.7312	FLNA|1502_RDADGTQTVNYVPSR_3	32.73	42.73	560.277	560.275	560.276	4906	3	27	2429.21	375272	35.8402	41.7934	FLNA|1502	RDADGTQTVNYVPSR	3	NA	NA	70	15	RDADGTQTVNYVPSR	1	110750	110764	0.192487	0.22898	0.147078	-0.3838	0.189727	0.225742	0.144961	-0.297642	40.4869	37.73	2.75689	5	0	MGTG
557.299	44.2714	PLA2R1|21_EGVAAALTPER_2	39.27	49.27	557.3	557.298	557.299	5661	2	27	2623.78	837402	42.4432	48.3999	PLA2R1|21	EGVAAALTPER	2	NA	NA	23	11	EGVAAALTPER	1	24726	24736	0.13946	0.195275	0.12512	-0.185272	0.12115	0.179054	0.114607	-0.260976	43.7297	44.27	-0.540344	5	0	MGTG
542.269	42.9302	CASP3|29_SGISLDNSYK_2	37.93	47.93	542.27	542.269	542.269	5073	2	27	2473.66	219053	41.2276	47.2141	CASP3|29	SGISLDNSYK	2	NA	NA	15	10	SGISLDNSYK	1	13506	13515	0.113802	0.167208	0.10695	-0.166667	0.102605	0.157242	0.100521	-0.175676	41.2276	42.93	-1.7024	5	0	MGTG
832.87	52.702	TMEM59|36_EAFDSVLGDTASCHR_2	47.7	57.7	832.871	832.869	832.87	8430	2	27	3361.67	789255	50.8307	56.7861	TMEM59|36	EAFDSVLGDTASCHR	2	13	Carbamidomethyl@C	66	15	EAFDSVLGDTASCHR	1	97548	97562	0.0603492	0.103684	0.0661262	-0.398838	0.101115	0.140629	0.0898249	-0.305161	56.0279	52.7	3.32788	5	0	MGTG
559.957	43.3358	P4HB|18_RDAPEEEDHVLVLR_3	38.34	48.34	559.958	559.956	559.957	5588	3	27	2604.61	679495	41.3132	47.2803	P4HB|18	RDAPEEEDHVLVLR	3	NA	NA	55	14	RDAPEEEDHVLVLR	1	72062	72075	0.0365332	0.0960114	0.061217	-0.550969	0.0460727	0.100686	0.0642073	-0.50636	43.4102	43.34	0.070156	5	0	MGTG
576.587	27.2043	IGFBP4|22_RDEAIHCPPCSEEK_3	22.2	32.2	576.588	576.586	576.587	1693	3	27	1598.18	1.2588e+06	25.205	31.1706	IGFBP4|22	RDEAIHCPPCSEEK	3	7;10	Carbamidomethyl@C;Carbamidomethyl@C	62	14	RDEAIHCPPCSEEK	1	85075	85088	0.00408855	0.0568157	0.0361896	-0.0683855	0.0421201	0.0916337	0.0584178	-0.291727	26.6364	27.2	-0.563642	5	0	MGTG
806.875	19.0125	SHMT2|27_QHSNAAQTQTGEANR_2	14.01	24.01	806.876	806.874	806.875	84	2	27	1117.13	16753.2	18.6188	24.6089	SHMT2|27	QHSNAAQTQTGEANR	2	NA	NA	67	15	QHSNAAQTQTGEANR	0	97940	97954	0	0	0	0.434211	0	0	0	-0.346719	18.6188	19.01	-0.391249	5	0	MGTG
590.614	17.8991	SHMT2|27_REHSNAAQTQTGEANR_3	12.9	22.9	590.615	590.613	590.614	1	3	27	1082.1	48742.1	18.035	24.0334	SHMT2|27	REHSNAAQTQTGEANR	3	NA	NA	73	16	REHSNAAQTQTGEANR	0	114194	114209	0	0	0	-0.0196999	0	0	0	-0.500528	18.035	17.9	0.134978	5	0	MGTG
848.393	68.08	UQCRHL|15_RDPEEEEEEEEELVDPLTTVR_3	63.08	73.08	848.394	848.392	848.393	10709	3	27	3994.56	552902	66.576	72.5535	UQCRHL|15	RDPEEEEEEEEELVDPLTTVR	3	NA	NA	84	21	RDPEEEEEEEEELVDPLTTVR	0	139126	139146	0	0	0	0.238514	0	0	0	-0.429372	66.576	68.08	-1.50401	5	0	MGTG
745.392	59.9233	PRTC11_SFANQPLEVVYSK_2	54.92	64.92	745.393	745.391	745.392	9112	2	27	3537.83	6.60992e+06	58.1526	64.1286	PRTC11	SFANQPLEVVYSK	2	13	Label:13C(6)15N(2)@K	45	13	SFANQPLEVVYSk	14	54049	54061	0.989182	0.990478	0.912076	0.852964	0.96896	0.973287	0.852521	0.717325	58.9638	59.92	-0.956172	6	0	MGTG
836.415	69.2789	SQSTM1|421_NYDIGAALDTIQYSK_2	64.28	74.28	836.416	836.414	836.415	11478	2	27	4197.23	3166744	67.4898	73.4611	SQSTM1|421	NYDIGAALDTIQYSK	2	NA	NA	71	15	NYDIGAALDTIQYSK	16	112951	112965	0.987931	0.989422	0.907322	0.825427	0.982608	0.984827	0.888958	0.813807	69.9539	69.28	0.673882	6	0	MGTG
773.895	53.205	PRTC08_ELGQSGVDTYLQTK_2	48.21	58.21	773.896	773.894	773.895	7715	2	27	3161.39	13398253	51.4296	57.4184	PRTC08	ELGQSGVDTYLQTK	2	14	Label:13C(6)15N(2)@K	56	14	ELGQSGVDTYLQTk	14	73976	73989	0.983912	0.986678	0.895968	0.868266	0.909448	0.925524	0.75275	0.910313	52.6898	53.21	-0.520218	6	0	MGTG
787.421	72.8278	PRTC15_LSSEAPALFQFDLK_2	67.83	77.83	787.422	787.42	787.421	12201	2	27	4387.61	4.5611e+06	71.0971	77.0604	PRTC15	LSSEAPALFQFDLK	2	14	Label:13C(6)15N(2)@K	63	14	LSSEAPALFQFDLk	10	87977	87990	0.956729	0.958613	0.816204	0.251558	0.912983	0.916147	0.737435	0.283574	73.1269	72.83	0.296871	6	0	MGTG
682.849	48.3756	SSBP1|17_ESETTTSLVLER_2	43.38	53.38	682.85	682.848	682.849	6521	2	27	2843.5	1.38046e+06	46.6121	52.579	SSBP1|17	ESETTTSLVLER	2	NA	NA	34	12	ESETTTSLVLER	11	38728	38739	0.952534	0.960319	0.820058	0.819521	0.946183	0.955325	0.808989	0.819521	47.3916	48.38	-0.988378	6	0	MGTG
761.381	51.6026	P4HB|18_DAPEEEDHVLVLR_2	46.6	56.6	761.382	761.38	761.381	7142	2	27	3009.91	986510	49.7185	55.697	P4HB|18	DAPEEEDHVLVLR	2	NA	NA	51	13	DAPEEEDHVLVLR	20	62689	62701	0.947345	0.951475	0.800864	0.378854	0.889917	0.908134	0.724987	0.410714	50.1651	51.6	-1.43491	6	0	MGTG
451.283	34.9206	PRTC04_DIPVPKPK_2	29.92	39.92	451.284	451.282	451.283	3696	2	27	2106.84	4.19328e+06	33.0748	39.0291	PRTC04	DIPVPKPK	2	8	Label:13C(6)15N(2)@K	2	8	DIPVPKPk	8	1238	1245	0.944563	0.951875	0.801694	0.642857	0.946279	0.953394	0.804872	0.641762	35.114	34.92	0.193992	6	0	MGTG
680.374	71.767	PRTC14_ELASGLSFPVGFK_2	66.77	76.77	680.375	680.372	680.373	12092	2	27	4357.82	367811	69.9209	75.8922	PRTC14	ELASGLSFPVGFK	2	13	Label:13C(6)15N(2)@K	48	13	ELASGLSFPVGFk	11	58945	58957	0.940566	0.950014	0.797863	0.634553	0.830288	0.856606	0.654863	0.67602	72.6304	71.77	0.86036	6	0	MGTG
415.74	33.151	MTHFD2|36_EAVVISGR_2	28.15	38.15	415.741	415.739	415.74	2932	2	27	1911.11	1.06242e+06	31.2772	37.2252	MTHFD2|36	EAVVISGR	2	NA	NA	4	8	EAVVISGR	5	3366	3373	0.926722	0.937197	0.773178	0.525452	0.933768	0.943093	0.784196	0.525452	31.8518	33.15	-1.29821	6	0	MGTG
498.802	63.8572	PRTC12_LTILEELR_2	58.86	68.86	498.803	498.801	498.802	10418	2	27	3897.26	84671.4	61.9363	67.89	PRTC12	LTILEELR	2	8	Label:13C(6)15N(4)@R	7	8	LTILEELr	5	6684	6691	0.924405	0.932238	0.764294	0.436782	0.605453	0.662954	0.461395	0.0303776	64.9543	63.86	1.09432	6	0	MGTG
801.411	60.0386	PRTC10_GILFVGSGVSGGEEGAR_2	55.04	65.04	801.412	801.41	801.411	9252	2	27	3573.31	865506	58.3274	64.2952	PRTC10	GILFVGSGVSGGEEGAR	2	17	Label:13C(6)15N(4)@R	79	17	GILFVGSGVSGGEEGAr	12	133314	133330	0.924068	0.931281	0.762615	0.673214	0.608551	0.648714	0.449385	0.425343	59.5552	60.04	-0.484765	6	0	MGTG
587.269	26.2323	TNFRSF12A|28_EQAPGTAPCSR_2	21.23	31.23	587.27	587.269	587.269	1470	2	27	1540.74	188959	24.5182	30.5108	TNFRSF12A|28	EQAPGTAPCSR	2	9	Carbamidomethyl@C	28	11	EQAPGTAPCSR	7	30183	30193	0.922182	0.929148	0.758916	0.618387	0.92099	0.929319	0.75921	0.535647	25.679	26.23	-0.550999	6	0	MGTG
758.338	44.9663	FBLN1|30_DVLLEACCADGHR_2	39.97	49.97	758.339	758.337	758.338	5654	2	27	2620.1	649195	43.0555	49.031	FBLN1|30	DVLLEACCADGHR	2	7;8	Carbamidomethyl@C;Carbamidomethyl@C	53	13	DVLLEACCADGHR	5	67837	67849	0.920721	0.920991	0.745238	-0.0126466	0.913941	0.918517	0.741225	-0.0221993	43.6683	44.97	-1.30172	6	0	MGTG
573.302	67.5684	PRTC13_NGFILDGFPR_2	62.57	72.57	573.303	573.301	573.302	10727	2	27	3991.45	165138	65.8358	71.8225	PRTC13	NGFILDGFPR	2	10	Label:13C(6)15N(4)@R	20	10	NGFILDGFPr	5	20997	21006	0.911214	0.923284	0.749011	0.750965	0.585207	0.616412	0.422829	0.502317	66.5242	67.57	-1.04576	6	0	MGTG
628.299	27.7828	ERO1A|24_EEQPPETAAQR_2	22.78	32.78	628.3	628.298	628.299	1965	2	27	1667.3	209244	26.0542	32.0168	ERO1A|24	EEQPPETAAQR	2	NA	NA	22	11	EEQPPETAAQR	3	23283	23293	0.900536	0.907573	0.724135	0.203189	0.938667	0.941045	0.780309	0.061257	27.7883	27.78	0.008263	6	0	MGTG
760.356	53.4877	BAX|66_IGDELDSNMELQR_2	48.49	58.49	760.357	760.356	760.356	7868	2	27	3201.92	225166	51.6705	57.6375	BAX|66	IGDELDSNMELQR	2	NA	NA	44	13	IGDELDSNMELQR	8	52033	52045	0.888638	0.899632	0.71233	0.334292	0.873145	0.88639	0.693589	0.316055	53.3653	53.49	-0.124668	6	0	MGTG
496.287	29.929	PRTC03_HVLTSIGEK_2	24.93	34.93	496.288	496.286	496.287	3191	2	27	1979.03	1.44614e+06	27.9508	33.9258	PRTC03	HVLTSIGEK	2	9	Label:13C(6)15N(2)@K	13	9	HVLTSIGEk	3	11840	11848	0.871378	0.877639	0.681765	0.356672	0.93558	0.939055	0.776594	0.0168622	32.9839	29.93	3.05385	6	0	MGTG
761.368	41.0085	FLNA|1502_NADGTQTVNYVPSR_2	36.01	46.01	761.369	761.367	761.368	4928	2	27	2435.24	264182	39.3307	45.3035	FLNA|1502	NADGTQTVNYVPSR	2	NA	NA	60	14	NADGTQTVNYVPSR	2	81126	81139	0.849737	0.839543	0.634355	-0.141467	0.839484	0.830614	0.624021	-0.0891744	40.5874	41.01	-0.422589	6	0	MGTG
471.236	24.3151	ERO1A|24_REEQPPETAAQR_3	19.32	29.32	471.237	471.235	471.236	1144	3	27	1451.11	261589	22.8252	28.8024	ERO1A|24	REEQPPETAAQR	3	NA	NA	37	12	REEQPPETAAQR	1	41313	41324	0.828194	0.81346	0.604838	-0.314658	0.827076	0.814501	0.605978	-0.366032	24.1851	24.32	-0.134899	6	0	MGTG
493.768	26.3416	PRTC01_SSAAPPPPPR_2	21.34	31.34	493.769	493.767	493.768	2545	2	27	1811.47	2.18176e+06	24.4131	30.3684	PRTC01	SSAAPPPPPR	2	10	Label:13C(6)15N(4)@R	18	10	SSAAPPPPPr	5	18864	18873	0.826773	0.848832	0.645387	0.321364	0.790634	0.818276	0.61014	0.656757	30.1911	26.34	3.85114	6	0	MGTG
558.326	56.6711	PRTC09_GLILVGGYGTR_2	51.67	61.67	558.327	558.325	558.326	9511	2	27	3642.46	280127	55.0215	60.9951	PRTC09	GLILVGGYGTR	2	11	Label:13C(6)15N(4)@R	29	11	GLILVGGYGTr	4	33413	33423	0.790499	0.812785	0.604099	0.755253	0.686071	0.714666	0.506843	0.460319	60.7077	56.67	4.03775	6	0	MGTG
695.832	45.6162	PRTC06_TASEFDSAIAQDK_2	40.62	50.62	695.833	695.831	695.832	5895	2	27	2682.22	7686193	43.7071	49.6423	PRTC06	TASEFDSAIAQDK	2	13	Label:13C(6)15N(2)@K	43	13	TASEFDSAIAQDk	16	49741	49753	0.787035	0.828951	0.622124	0.491316	0.860059	0.884138	0.690507	0.335378	44.7036	45.62	-0.916377	6	0	MGTG
570.276	58.136	PDIA3|26_RDVLELTDDNFESR_3	53.14	63.14	570.277	570.275	570.276	9041	3	27	3519.76	1.12653e+06	56.2728	62.2336	PDIA3|26	RDVLELTDDNFESR	3	NA	NA	65	14	RDVLELTDDNFESR	1	94269	94282	0.775623	0.755985	0.545684	-0.248186	0.777842	0.757788	0.54744	-0.344019	58.6626	58.14	0.522593	6	0	MGTG
427.226	43.2527	CALR|18_EPAVYFK_2	38.25	48.25	427.227	427.225	427.226	5195	2	27	2504.35	810823	41.7391	47.6987	CALR|18	EPAVYFK	2	NA	NA	1	7	EPAVYFK	6	0	6	0.766887	0.806159	0.596915	0.626087	0.776488	0.813311	0.604674	0.645217	41.7391	43.25	-1.51088	6	0	MGTG
422.736	38.5693	PRTC05_IGDYAGIK_2	33.57	43.57	422.737	422.735	422.736	4329	2	27	2274.1	14472147	36.7574	42.7324	PRTC05	IGDYAGIK	2	8	Label:13C(6)15N(2)@K	6	8	IGDYAGIk	8	4710	4717	0.744509	0.781394	0.570982	0.633552	0.19139	0.325505	0.211069	0.410235	37.9017	38.57	-0.668253	6	0	MGTG
613.317	30.6463	PRTC02_GISNEGQNASIK_2	25.65	35.65	613.318	613.316	613.317	2601	2	27	1824.71	61759176	28.8398	34.7985	PRTC02	GISNEGQNASIK	2	12	Label:13C(6)15N(2)@K	40	12	GISNEGQNASIk	13	45460	45471	0.742553	0.785154	0.574833	0.621635	0.560237	0.615962	0.422465	0.221283	30.4118	30.65	-0.238193	6	0	MGTG
586.8	46.4127	PRTC07_SAAGAFGPELSR_2	41.41	51.41	586.801	586.799	586.8	6460	2	27	2827.67	2.07639e+06	44.7464	50.6816	PRTC07	SAAGAFGPELSR	2	12	Label:13C(6)15N(4)@R	32	12	SAAGAFGPELSr	13	34141	34152	0.685216	0.733729	0.524443	0.638971	0.321389	0.413224	0.271195	0.247992	47.1278	46.41	0.717768	6	0	MGTG
598.297	34.4875	ENG|26_RETVHCDLQPVGPER_3	29.49	39.49	598.298	598.296	598.297	3513	3	27	2059.18	735118	32.9018	38.8616	ENG|26	RETVHCDLQPVGPER	3	6	Carbamidomethyl@C	69	15	RETVHCDLQPVGPER	1	107407	107421	0.658215	0.656949	0.456306	-0.380041	0.388411	0.407016	0.266861	-0.419549	34.3196	34.49	-0.170368	6	0	MGTG
507.602	41.2944	SSBP1|17_RESETTTSLVLER_3	36.29	46.29	507.603	507.601	507.602	5930	3	27	2691.27	322526	39.3586	45.3384	SSBP1|17	RESETTTSLVLER	3	NA	NA	49	13	RESETTTSLVLER	1	62377	62389	0.644106	0.635765	0.43863	-0.354538	0.61643	0.612613	0.419763	-0.305688	44.8546	41.29	3.56455	6	0	MGTG
554.272	47.8065	HSP90B1|24_REVDVDGTVEEDLGK_3	42.81	52.81	554.273	554.271	554.272	6352	3	27	2800.17	541511	45.9759	51.9228	HSP90B1|24	REVDVDGTVEEDLGK	3	NA	NA	68	15	REVDVDGTVEEDLGK	1	104551	104565	0.63066	0.625538	0.430241	-0.0873206	0.605321	0.600671	0.4102	-0.243336	46.6694	47.81	-1.14058	6	0	MGTG
681.355	58.8019	LSM3|7_REQQTTNTVEEPLDLIR_3	53.8	63.8	681.356	681.354	681.355	9499	3	27	3639.21	4.04059e+06	56.8094	62.7781	LSM3|7	REQQTTNTVEEPLDLIR	3	NA	NA	78	17	REQQTTNTVEEPLDLIR	1	131650	131666	0.610216	0.603986	0.412844	-0.395627	0.606248	0.602154	0.411381	-0.358997	60.6535	58.8	1.85351	6	0	MGTG
594.299	39.5989	FKBP11|26_EAGLETESPVR_2	34.6	44.6	594.3	594.298	594.299	5372	2	27	2548.09	401808	37.76	43.753	FKBP11|26	EAGLETESPVR	2	NA	NA	26	11	EAGLETESPVR	2	27303	27313	0.607726	0.621379	0.426854	0.0321763	0.609227	0.623194	0.42833	0.0321763	42.4682	39.6	2.86824	6	0	MGTG
752.854	54.3255	HSP90B1|24_EVDVDGTVEEDLGK_2	49.33	59.33	752.855	752.853	752.854	8691	2	27	3424.71	2688451	52.5163	58.4872	HSP90B1|24	EVDVDGTVEEDLGK	2	NA	NA	57	14	EVDVDGTVEEDLGK	3	77967	77980	0.580308	0.608253	0.416259	0.171305	0.498661	0.535563	0.359801	0.0383335	57.0785	54.33	2.7485	6	0	MGTG
337.187	35.4809	CALR|18_REPAVYFK_3	30.48	40.48	337.188	337.186	337.187	3291	3	27	2004.11	406253	33.1921	39.1671	CALR|18	REPAVYFK	3	NA	NA	3	8	REPAVYFK	1	2071	2078	0.576975	0.58882	0.400815	-0.35769	0.511381	0.532973	0.357851	-0.134647	33.4018	35.48	-2.07821	6	0	MGTG
818.891	39.83	ENG|26_ETVHCDLQPVGPER_2	34.83	44.83	818.892	818.89	818.891	4547	2	27	2331.23	120249	38.2577	44.1965	ENG|26	ETVHCDLQPVGPER	2	5	Carbamidomethyl@C	58	14	ETVHCDLQPVGPER	1	78825	78838	0.575107	0.573982	0.389204	-0.344019	0.647589	0.637407	0.439986	-0.344019	38.8538	39.83	-0.976169	6	0	MGTG
584.304	60.3621	P4HA3|29_DTFSALTSVAR_2	55.36	65.36	584.305	584.303	584.304	9715	2	27	3697.33	140871	58.6122	64.6036	P4HA3|29	DTFSALTSVAR	2	NA	NA	27	11	DTFSALTSVAR	1	28473	28483	0.572628	0.578112	0.392421	-0.134053	0.574544	0.580306	0.394134	-0.202439	61.6222	60.36	1.26222	6	0	MGTG
329.53	27.6908	MTHFD2|36_REAVVISGR_3	22.69	32.69	329.531	329.529	329.53	1815	3	27	1630.58	447285	25.4754	31.4535	MTHFD2|36	REAVVISGR	3	NA	NA	10	9	REAVVISGR	1	8240	8248	0.5508	0.564073	0.381533	-0.206928	0.543374	0.557813	0.376719	-0.1261	27.1763	27.69	-0.513698	6	0	MGTG
448.569	33.1905	FKBP11|26_REAGLETESPVR_3	28.19	38.19	448.57	448.568	448.569	4018	3	27	2190.53	580994	31.0651	37.0454	FKBP11|26	REAGLETESPVR	3	NA	NA	39	12	REAGLETESPVR	1	44833	44844	0.514834	0.522799	0.350224	-0.314658	0.524344	0.532346	0.357379	-0.314658	36.5088	33.19	3.31879	6	0	MGTG
776.86	67.1829	PDIA3|26_DVLELTDDNFESR_2	62.18	72.18	776.861	776.859	776.86	10557	2	27	3941.21	1.09981e+06	65.4492	71.4077	PDIA3|26	DVLELTDDNFESR	2	NA	NA	52	13	DVLELTDDNFESR	2	64957	64969	0.491655	0.52244	0.349957	0.0186713	0.498056	0.527867	0.354016	-0.103181	65.6869	67.18	-1.4931	6	0	MGTG
467.733	29.7107	CENPU|49_NSDVSSIGR_2	24.71	34.71	467.734	467.732	467.733	3065	2	27	1946.19	372504	27.8114	33.7669	CENPU|49	NSDVSSIGR	2	NA	NA	11	9	NSDVSSIGR	1	10328	10336	0.481867	0.502422	0.335116	-0.218292	0.446961	0.471708	0.312724	-0.291606	32.4365	29.71	2.7265	6	0	MGTG
764.835	69.703	ATF4|76_EDAFSGTDWMLEK_2	64.7	74.7	764.836	764.834	764.835	11541	2	27	4213.38	400960	68.0648	74.0403	ATF4|76	EDAFSGTDWMLEK	2	NA	NA	42	13	EDAFSGTDWMLEK	2	47905	47917	0.448184	0.472395	0.313221	-0.00629616	0.458505	0.48105	0.319489	-0.00629616	70.2231	69.7	0.523074	6	0	MGTG
443.882	22.4798	TNFRSF12A|28_REQAPGTAPCSR_3	17.48	27.48	443.884	443.882	443.883	1422	3	27	1527.6	451302	21.1913	27.161	TNFRSF12A|28	REQAPGTAPCSR	3	10	Carbamidomethyl@C	33	12	REQAPGTAPCSR	1	37958	37969	0.447592	0.466449	0.308934	-0.320719	0.473567	0.489701	0.325788	-0.320719	25.4601	22.48	2.98006	6	0	MGTG
605.827	72.7819	BCL2|130_FATVVEELFR_2	67.78	77.78	605.828	605.826	605.827	11742	2	27	4266.98	5688984	70.8649	76.8596	BCL2|130	FATVVEELFR	2	NA	NA	16	10	FATVVEELFR	1	14868	14877	0.371617	0.402204	0.263512	-0.281853	0.330131	0.365673	0.238323	-0.22278	71.1164	72.78	-1.66363	6	0	MGTG
560.276	37.7312	FLNA|1502_RDADGTQTVNYVPSR_3	32.73	42.73	560.277	560.275	560.276	4810	3	27	2403.18	220791	35.862	41.8204	FLNA|1502	RDADGTQTVNYVPSR	3	NA	NA	70	15	RDADGTQTVNYVPSR	1	110977	110991	0.370747	0.389769	0.25489	-0.380041	0.387691	0.405615	0.265886	-0.293882	40.053	37.73	2.32304	6	0	MGTG
557.299	44.2714	PLA2R1|21_EGVAAALTPER_2	39.27	49.27	557.3	557.298	557.299	6014	2	27	2713.49	215049	42.4209	48.3897	PLA2R1|21	EGVAAALTPER	2	NA	NA	23	11	EGVAAALTPER	1	25113	25123	0.369899	0.396941	0.259856	-0.156004	0.386608	0.411647	0.270093	-0.217073	45.2248	44.27	0.954821	6	0	MGTG
702.834	41.5014	CPSF7|33_DVLTATSQPSDDR_2	36.5	46.5	702.835	702.833	702.834	5846	2	27	2669.72	630226	39.7123	45.6836	CPSF7|33	DVLTATSQPSDDR	2	NA	NA	46	13	DVLTATSQPSDDR	1	57553	57565	0.363988	0.387319	0.253197	-0.0198112	0.372769	0.395109	0.258586	-0.208152	44.4953	41.5	2.99528	6	0	MGTG
557.928	36.8535	FBLN1|30_RDVLLEACCADGHR_3	31.85	41.85	557.929	557.927	557.928	3972	3	27	2178.61	556749	34.9032	40.8686	FBLN1|30	RDVLLEACCADGHR	3	8;9	Carbamidomethyl@C;Carbamidomethyl@C	64	14	RDVLLEACCADGHR	1	91487	91500	0.340898	0.361777	0.23566	-0.516136	0.373044	0.390944	0.255702	-0.507428	36.3102	36.85	-0.539824	6	0	MGTG
496.295	48.7357	ERN1|280_LTPTLYVGK_2	43.74	53.74	496.296	496.294	496.295	7139	2	27	3009.2	142654	47.0265	52.9582	ERN1|280	LTPTLYVGK	2	NA	NA	14	9	LTPTLYVGK	2	12856	12864	0.281614	0.349439	0.227256	-0.0976906	0.510724	0.547799	0.369069	-0.00513196	50.1534	48.74	1.41335	6	0	MGTG
520.925	34.7462	CPSF7|33_RDVLTATSQPSDDR_3	29.75	39.75	520.926	520.924	520.925	3229	3	27	1988.33	1.12635e+06	32.5615	38.5396	CPSF7|33	RDVLTATSQPSDDR	3	NA	NA	61	14	RDVLTATSQPSDDR	1	82816	82829	0.257801	0.288584	0.186369	-0.348374	0.289306	0.317235	0.205509	-0.301887	33.1388	34.75	-1.61116	6	0	MGTG
630.957	51.6242	HSP90B1|22_RDDEVDVDGTVEEDLGK_3	46.62	56.62	630.958	630.956	630.957	7123	3	27	3004.7	2.53889e+06	49.8909	55.8516	HSP90B1|22	RDDEVDVDGTVEEDLGK	3	NA	NA	77	17	RDDEVDVDGTVEEDLGK	2	126834	126850	0.237145	0.280786	0.18119	-0.0395147	0.247804	0.292615	0.189051	-0.137203	50.0783	51.62	-1.54167	6	0	MGTG
364.519	25.9378	CENPU|49_RDSDVSSIGR_3	20.94	30.94	364.521	364.519	364.519	1191	3	27	1465.02	414248	23.9429	29.9065	CENPU|49	RDSDVSSIGR	3	NA	NA	19	10	RDSDVSSIGR	1	19125	19134	0.181153	0.226982	0.145772	-0.231789	0.171062	0.217408	0.139521	-0.231789	24.417	25.94	-1.52298	6	0	MGTG
806.875	19.0125	SHMT2|27_QHSNAAQTQTGEANR_2	14.01	24.01	806.876	806.874	806.875	589	2	27	1283.66	19783.6	18.6155	24.6133	SHMT2|27	QHSNAAQTQTGEANR	2	NA	NA	67	15	QHSNAAQTQTGEANR	1	101765	101779	0.158658	0.18251	0.116844	0.533835	0.383863	0.400793	0.262531	-0.247095	21.3944	19.01	2.38438	6	0	MGTG
794.019	50.9195	EIF4B|46_RDLEGDVSTTWHSNDDDVYR_3	45.92	55.92	794.02	794.018	794.019	7548	3	27	3117.75	2.58036e+06	48.8186	54.7921	EIF4B|46	RDLEGDVSTTWHSNDDDVYR	3	NA	NA	83	20	RDLEGDVSTTWHSNDDDVYR	2	137911	137930	0.127197	0.179407	0.114836	-0.231552	0.146165	0.195999	0.12559	-0.344757	51.9625	50.92	1.04246	6	0	MGTG
542.269	42.9302	CASP3|29_SGISLDNSYK_2	37.93	47.93	542.27	542.269	542.269	5739	2	27	2641.79	627056	41.2273	47.2132	CASP3|29	SGISLDNSYK	2	NA	NA	15	10	SGISLDNSYK	2	14112	14121	0.114273	0.175269	0.112159	-0.0879022	0.102165	0.164557	0.105239	-0.0969112	44.0298	42.93	1.0998	6	0	MGTG
590.614	17.8991	SHMT2|27_REHSNAAQTQTGEANR_3	12.9	22.9	590.615	590.613	590.614	698	3	27	1317.12	18605	18.0384	24.0327	SHMT2|27	REHSNAAQTQTGEANR	3	NA	NA	73	16	REHSNAAQTQTGEANR	1	120063	120078	0.105216	0.145643	0.0930499	0.0507919	0.0248059	0.0818596	0.0521718	-0.452987	21.952	17.9	4.05195	6	0	MGTG
848.393	68.08	UQCRHL|15_RDPEEEEEEEEELVDPLTTVR_3	63.08	73.08	848.394	848.392	848.393	10763	3	27	4001.5	1.20945e+06	66.5746	72.5584	UQCRHL|15	RDPEEEEEEEEELVDPLTTVR	3	NA	NA	84	21	RDPEEEEEEEEELVDPLTTVR	1	139683	139703	0.061738	0.0887817	0.0565947	0.296847	0.0909328	0.124117	0.0792198	-0.371038	66.6917	68.08	-1.38833	6	0	MGTG
832.87	52.702	TMEM59|36_EAFDSVLGDTASCHR_2	47.7	57.7	832.871	832.869	832.87	7650	2	27	3144.67	3.68546e+06	50.8305	56.8015	TMEM59|36	EAFDSVLGDTASCHR	2	13	Carbamidomethyl@C	66	15	EAFDSVLGDTASCHR	1	96291	96305	0.0603492	0.103684	0.0661262	-0.398838	0.101115	0.140629	0.0898249	-0.305161	52.4111	52.7	-0.288889	6	0	MGTG
607.616	43.539	TMEM59|36_REAFDSVLGDTASCHR_3	38.54	48.54	607.617	607.615	607.616	5759	3	27	2646.52	476092	41.4498	47.4073	TMEM59|36	REAFDSVLGDTASCHR	3	14	Carbamidomethyl@C	75	16	REAFDSVLGDTASCHR	1	125538	125553	0.022148	0.0750998	0.0478551	-0.472604	0.0230364	0.0737829	0.0470144	-0.439872	44.1087	43.54	0.568714	6	0	MGTG
559.957	43.3358	P4HB|18_RDAPEEEDHVLVLR_3	38.34	48.34	559.958	559.956	559.957	6187	3	27	2758.32	581928	41.3176	47.2813	P4HB|18	RDAPEEEDHVLVLR	3	NA	NA	55	14	RDAPEEEDHVLVLR	1	73092	73105	0.00649971	0.069614	0.0443536	-0.555323	-0.0410417	0.0227475	0.0144828	-0.541193	45.972	43.34	2.63203	6	0	MGTG
576.587	27.2043	IGFBP4|22_RDEAIHCPPCSEEK_3	22.2	32.2	576.588	576.586	576.587	1686	3	27	1596.76	1.20501e+06	25.1853	31.1782	IGFBP4|22	RDEAIHCPPCSEEK	3	7;10	Carbamidomethyl@C;Carbamidomethyl@C	62	14	RDEAIHCPPCSEEK	1	85403	85416	0.00408855	0.0568157	0.0361896	-0.0683855	0.0421201	0.0916337	0.0584178	-0.291727	26.6127	27.2	-0.587334	6	0	MGTG
786.327	31.4927	IGFBP4|22_DEAIHCPPCSEEK_2	26.49	36.49	786.328	786.326	786.327	2387	2	27	1773.74	369403	29.5624	35.5423	IGFBP4|22	DEAIHCPPCSEEK	2	6;9	Carbamidomethyl@C;Carbamidomethyl@C	54	13	DEAIHCPPCSEEK	0	69541	69553	0	0	0	0.0935193	0	0	0	-0.317846	29.5624	31.49	-1.92761	6	0	MGTG
867.881	58.2026	HSP90B1|22_DDEVDVDGTVEEDLGK_2	53.2	63.2	867.882	867.88	867.881	8525	2	27	3380.19	158072	56.3366	62.332	HSP90B1|22	DDEVDVDGTVEEDLGK	2	NA	NA	74	16	DDEVDVDGTVEEDLGK	0	121833	121848	0	0	0	0.467324	0	0	0	-0.288941	56.3366	58.2	-1.86342	6	0	MGTG
836.415	69.2789	SQSTM1|421_NYDIGAALDTIQYSK_2	64.28	74.28	836.416	836.414	836.415	11671	2	27	4195.38	2.74426e+06	67.4455	73.4326	SQSTM1|421	NYDIGAALDTIQYSK	2	NA	NA	71	15	NYDIGAALDTIQYSK	17	114275	114289	0.98879	0.990432	0.911863	0.874607	0.983949	0.986306	0.894522	0.863397	69.923	69.28	0.643022	7	3	MOCK
745.392	59.9233	PRTC11_SFANQPLEVVYSK_2	54.92	64.92	745.393	745.391	745.392	9316	2	27	3538.25	25314506	58.0161	64.0044	PRTC11	SFANQPLEVVYSK	2	13	Label:13C(6)15N(2)@K	45	13	SFANQPLEVVYSk	16	55189	55201	0.987621	0.989544	0.907857	0.859531	0.967716	0.9727	0.850903	0.727366	58.9709	59.92	-0.94913	7	3	MOCK
773.895	53.205	PRTC08_ELGQSGVDTYLQTK_2	48.21	58.21	773.896	773.894	773.895	7936	2	27	3165.43	4991589	51.2733	57.2325	PRTC08	ELGQSGVDTYLQTK	2	14	Label:13C(6)15N(2)@K	56	14	ELGQSGVDTYLQTk	15	75012	75025	0.984693	0.987361	0.898677	0.807265	0.908852	0.925324	0.752414	0.84641	52.7571	53.21	-0.45288	7	3	MOCK
787.421	72.8278	PRTC15_LSSEAPALFQFDLK_2	67.83	77.83	787.422	787.42	787.421	12395	2	27	4385.98	12119986	70.8583	76.8395	PRTC15	LSSEAPALFQFDLK	2	14	Label:13C(6)15N(2)@K	63	14	LSSEAPALFQFDLk	16	88974	88987	0.973713	0.97637	0.861328	0.334244	0.943837	0.949068	0.795943	0.366601	73.0997	72.83	0.269661	7	3	MOCK
680.374	71.767	PRTC14_ELASGLSFPVGFK_2	66.77	76.77	680.375	680.372	680.373	12322	2	27	4365.96	287177	69.9452	75.9233	PRTC14	ELASGLSFPVGFK	2	13	Label:13C(6)15N(2)@K	48	13	ELASGLSFPVGFk	9	60001	60013	0.957741	0.962251	0.824521	0.643291	0.917839	0.929785	0.760014	0.68465	72.766	71.77	0.995965	7	3	MOCK
451.283	34.9206	PRTC04_DIPVPKPK_2	29.92	39.92	451.284	451.282	451.283	4175	2	27	2179.29	325525	33.4229	39.3893	PRTC04	DIPVPKPK	2	8	Label:13C(6)15N(2)@K	2	8	DIPVPKPk	5	1394	1401	0.956363	0.962788	0.825782	0.534756	0.943362	0.951149	0.800191	0.535304	36.3214	34.92	1.40142	7	3	MOCK
761.381	51.6026	P4HB|18_DAPEEEDHVLVLR_2	46.6	56.6	761.382	761.38	761.381	7336	2	27	3006.2	933686	49.7868	55.7517	P4HB|18	DAPEEEDHVLVLR	2	NA	NA	51	13	DAPEEEDHVLVLR	18	63649	63661	0.953298	0.956621	0.811801	0.620441	0.891479	0.90937	0.726871	0.62766	50.1034	51.6	-1.49661	7	3	MOCK
682.849	48.3756	SSBP1|17_ESETTTSLVLER_2	43.38	53.38	682.85	682.848	682.849	6734	2	27	2844.62	2.45843e+06	46.7004	52.6796	SSBP1|17	ESETTTSLVLER	2	NA	NA	34	12	ESETTTSLVLER	11	39330	39341	0.949967	0.958683	0.816361	0.81938	0.942344	0.952641	0.803291	0.81938	47.4104	48.38	-0.969638	7	3	MOCK
415.74	33.151	MTHFD2|36_EAVVISGR_2	28.15	38.15	415.741	415.739	415.74	3187	2	27	1916.97	95987.4	31.3061	37.2822	MTHFD2|36	EAVVISGR	2	NA	NA	4	8	EAVVISGR	6	3361	3368	0.940113	0.949415	0.796646	0.633279	0.949427	0.957129	0.812915	0.633279	31.9496	33.15	-1.20044	7	3	MOCK
801.411	60.0386	PRTC10_GILFVGSGVSGGEEGAR_2	55.04	65.04	801.412	801.41	801.411	9448	2	27	3572.6	943097	58.4123	64.3841	PRTC10	GILFVGSGVSGGEEGAR	2	17	Label:13C(6)15N(4)@R	79	17	GILFVGSGVSGGEEGAr	11	135510	135526	0.925092	0.932097	0.764046	0.615888	0.627388	0.665408	0.463485	0.367788	59.5434	60.04	-0.496584	7	3	MOCK
628.299	27.7828	ERO1A|24_EEQPPETAAQR_2	22.78	32.78	628.3	628.298	628.299	2209	2	27	1664.13	298974	25.789	31.7386	ERO1A|24	EEQPPETAAQR	2	NA	NA	22	11	EEQPPETAAQR	3	23330	23340	0.922762	0.927914	0.756799	0.203377	0.901478	0.907783	0.724453	0.0608818	27.7355	27.78	-0.044519	7	3	MOCK
573.302	67.5684	PRTC13_NGFILDGFPR_2	62.57	72.57	573.303	573.301	573.302	11542	2	27	4161.14	59127.5	65.849	71.8178	PRTC13	NGFILDGFPR	2	10	Label:13C(6)15N(4)@R	20	10	NGFILDGFPr	5	21981	21990	0.902969	0.91636	0.737773	0.750708	0.567012	0.599997	0.409663	0.502574	69.3524	67.57	1.78236	7	3	MOCK
498.802	63.8572	PRTC12_LTILEELR_2	58.86	68.86	498.803	498.801	498.802	10105	2	27	3749.06	103099	62.0203	67.9776	PRTC12	LTILEELR	2	8	Label:13C(6)15N(4)@R	7	8	LTILEELr	6	5720	5727	0.902714	0.914953	0.735545	0.519431	0.587245	0.647447	0.448327	0.426656	62.4844	63.86	-1.37563	7	3	MOCK
587.269	26.2323	TNFRSF12A|28_EQAPGTAPCSR_2	21.23	31.23	587.27	587.269	587.269	1708	2	27	1536.86	150856	24.3873	30.3538	TNFRSF12A|28	EQAPGTAPCSR	2	9	Carbamidomethyl@C	28	11	EQAPGTAPCSR	7	30180	30190	0.900561	0.908341	0.7253	0.641839	0.959708	0.961522	0.822823	0.56379	25.6143	26.23	-0.615703	7	3	MOCK
758.338	44.9663	FBLN1|30_DVLLEACCADGHR_2	39.97	49.97	758.339	758.337	758.338	5848	2	27	2617.9	1204875	43.5851	49.5612	FBLN1|30	DVLLEACCADGHR	2	7;8	Carbamidomethyl@C;Carbamidomethyl@C	53	13	DVLLEACCADGHR	4	68665	68677	0.881356	0.881194	0.686519	-0.113873	0.876388	0.880685	0.685835	-0.113656	43.6317	44.97	-1.33831	7	3	MOCK
496.287	29.929	PRTC03_HVLTSIGEK_2	24.93	34.93	496.288	496.286	496.287	3321	2	27	1953.16	91678.7	28.2281	34.1837	PRTC03	HVLTSIGEK	2	9	Label:13C(6)15N(2)@K	13	9	HVLTSIGEk	2	11610	11618	0.869566	0.871677	0.673935	0.213526	0.907112	0.910438	0.728511	-0.126283	32.5528	29.93	2.62275	7	3	MOCK
471.236	24.3151	ERO1A|24_REEQPPETAAQR_3	19.32	29.32	471.237	471.235	471.236	1396	3	27	1451.11	344264	22.5013	28.4747	ERO1A|24	REEQPPETAAQR	3	NA	NA	37	12	REEQPPETAAQR	1	42542	42553	0.828194	0.81346	0.604838	-0.314658	0.827076	0.814501	0.605978	-0.366032	24.1852	24.32	-0.134805	7	3	MOCK
761.368	41.0085	FLNA|1502_NADGTQTVNYVPSR_2	36.01	46.01	761.369	761.367	761.368	5128	2	27	2432.72	203358	39.4514	45.4138	FLNA|1502	NADGTQTVNYVPSR	2	NA	NA	60	14	NADGTQTVNYVPSR	1	82045	82058	0.804091	0.786857	0.576586	-0.248186	0.799862	0.783407	0.57304	-0.195893	40.5453	41.01	-0.46467	7	3	MOCK
493.768	26.3416	PRTC01_SSAAPPPPPR_2	21.34	31.34	493.769	493.767	493.768	2477	2	27	1733.36	246216	24.5391	30.5183	PRTC01	SSAAPPPPPR	2	10	Label:13C(6)15N(4)@R	18	10	SSAAPPPPPr	6	18408	18417	0.796194	0.82941	0.622647	0.44955	0.698153	0.745693	0.535763	0.521622	28.8893	26.34	2.54928	7	3	MOCK
558.326	56.6711	PRTC09_GLILVGGYGTR_2	51.67	61.67	558.327	558.325	558.326	9387	2	27	3556.41	276192	55.0513	61.0247	PRTC09	GLILVGGYGTR	2	11	Label:13C(6)15N(4)@R	29	11	GLILVGGYGTr	3	33000	33010	0.790395	0.807395	0.598247	0.640994	0.679801	0.705012	0.498117	0.352251	59.2736	56.67	2.60358	7	3	MOCK
695.832	45.6162	PRTC06_TASEFDSAIAQDK_2	40.62	50.62	695.833	695.831	695.832	6083	2	27	2678.16	9551967	43.6705	49.6169	PRTC06	TASEFDSAIAQDK	2	13	Label:13C(6)15N(2)@K	43	13	TASEFDSAIAQDk	12	50833	50845	0.788406	0.829859	0.623159	0.734585	0.875663	0.89697	0.708474	0.584075	44.636	45.62	-0.983956	7	3	MOCK
427.226	43.2527	CALR|18_EPAVYFK_2	38.25	48.25	427.227	427.225	427.226	5383	2	27	2500.2	591556	41.623	47.5723	CALR|18	EPAVYFK	2	NA	NA	1	7	EPAVYFK	5	6	12	0.770912	0.808483	0.599422	0.767826	0.780729	0.815979	0.607603	0.787826	41.67	43.25	-1.58002	7	3	MOCK
613.317	30.6463	PRTC02_GISNEGQNASIK_2	25.65	35.65	613.318	613.316	613.317	2917	2	27	1844.78	816021	28.8626	34.8351	PRTC02	GISNEGQNASIK	2	12	Label:13C(6)15N(2)@K	40	12	GISNEGQNASIk	9	46755	46766	0.746527	0.785468	0.575155	0.463918	0.584424	0.635315	0.438259	0.539112	30.7463	30.65	0.09628	7	3	MOCK
422.736	38.5693	PRTC05_IGDYAGIK_2	33.57	43.57	422.737	422.735	422.736	4534	2	27	2274.26	10398252	36.904	42.8791	PRTC05	IGDYAGIK	2	8	Label:13C(6)15N(2)@K	6	8	IGDYAGIk	8	4649	4656	0.744162	0.780142	0.569707	0.633552	0.184817	0.318391	0.206285	0.410235	37.9043	38.57	-0.665663	7	3	MOCK
586.8	46.4127	PRTC07_SAAGAFGPELSR_2	41.41	51.41	586.801	586.799	586.8	6693	2	27	2833.92	381203	44.5436	50.5033	PRTC07	SAAGAFGPELSR	2	12	Label:13C(6)15N(4)@R	32	12	SAAGAFGPELSr	12	34204	34215	0.689178	0.737965	0.528426	0.708104	0.330594	0.42245	0.27766	0.326991	47.2319	46.41	0.82193	7	3	MOCK
752.854	54.3255	HSP90B1|24_EVDVDGTVEEDLGK_2	49.33	59.33	752.855	752.853	752.854	8954	2	27	3440.88	973546	52.5405	58.5062	HSP90B1|24	EVDVDGTVEEDLGK	2	NA	NA	57	14	EVDVDGTVEEDLGK	1	79029	79042	0.673968	0.665295	0.463389	-0.0204901	0.634671	0.623679	0.428725	-0.14057	57.348	54.33	3.01805	7	3	MOCK
554.272	47.8065	HSP90B1|24_REVDVDGTVEEDLGK_3	42.81	52.81	554.273	554.271	554.272	7414	3	27	3027.03	1.6955e+06	45.9087	51.8693	HSP90B1|24	REVDVDGTVEEDLGK	3	NA	NA	68	15	REVDVDGTVEEDLGK	3	107625	107639	0.648724	0.659375	0.458358	0.0610389	0.633189	0.644173	0.445597	-0.0949761	50.4505	47.81	2.64055	7	3	MOCK
507.602	41.2944	SSBP1|17_RESETTTSLVLER_3	36.29	46.29	507.603	507.601	507.602	6129	3	27	2690.15	500328	39.504	45.4479	SSBP1|17	RESETTTSLVLER	3	NA	NA	49	13	RESETTTSLVLER	1	63349	63361	0.644106	0.635765	0.43863	-0.354538	0.61643	0.612613	0.419763	-0.305688	44.8359	41.29	3.5459	7	3	MOCK
832.87	52.702	TMEM59|36_EAFDSVLGDTASCHR_2	47.7	57.7	832.871	832.869	832.87	8440	2	27	3300.76	234173	50.8703	56.8551	TMEM59|36	EAFDSVLGDTASCHR	2	13	Carbamidomethyl@C	66	15	EAFDSVLGDTASCHR	1	98161	98175	0.626902	0.627941	0.432204	-0.380041	0.618022	0.620522	0.426158	-0.293882	55.0127	52.7	2.31275	7	3	MOCK
760.356	53.4877	BAX|66_IGDELDSNMELQR_2	48.49	58.49	760.357	760.356	760.356	8680	2	27	3366.11	3.85665e+06	51.6585	57.6221	BAX|66	IGDELDSNMELQR	2	NA	NA	44	13	IGDELDSNMELQR	3	54181	54193	0.626437	0.653905	0.453741	-0.101552	0.604387	0.634669	0.437727	-0.106437	56.1018	53.49	2.61178	7	3	MOCK
594.299	39.5989	FKBP11|26_EAGLETESPVR_2	34.6	44.6	594.3	594.298	594.299	5564	2	27	2545.36	222517	37.8727	43.8173	FKBP11|26	EAGLETESPVR	2	NA	NA	26	11	EAGLETESPVR	1	27220	27230	0.598722	0.60338	0.41236	-0.0605066	0.601302	0.60634	0.414726	-0.0605066	42.4227	39.6	2.82274	7	3	MOCK
337.187	35.4809	CALR|18_REPAVYFK_3	30.48	40.48	337.188	337.186	337.187	3509	3	27	2003.14	156319	33.1908	39.1433	CALR|18	REPAVYFK	3	NA	NA	3	8	REPAVYFK	1	2073	2080	0.576975	0.58882	0.400815	-0.35769	0.511381	0.532973	0.357851	-0.134647	33.3857	35.48	-2.09427	7	3	MOCK
818.891	39.83	ENG|26_ETVHCDLQPVGPER_2	34.83	44.83	818.892	818.89	818.891	4737	2	27	2326.65	141036	38.1544	44.1184	ENG|26	ETVHCDLQPVGPER	2	5	Carbamidomethyl@C	58	14	ETVHCDLQPVGPER	1	79783	79796	0.575107	0.573982	0.389204	-0.344019	0.647589	0.637407	0.439986	-0.344019	38.7776	39.83	-1.05245	7	3	MOCK
329.53	27.6908	MTHFD2|36_REAVVISGR_3	22.69	32.69	329.531	329.529	329.53	2073	3	27	1631.3	373464	25.7135	31.696	MTHFD2|36	REAVVISGR	3	NA	NA	10	9	REAVVISGR	1	8138	8146	0.5508	0.564073	0.381533	-0.206928	0.543374	0.557813	0.376719	-0.1261	27.1883	27.69	-0.501687	7	3	MOCK
607.616	43.539	TMEM59|36_REAFDSVLGDTASCHR_3	38.54	48.54	607.617	607.615	607.616	5538	3	27	2538.83	5.59115e+06	41.4034	47.3484	TMEM59|36	REAFDSVLGDTASCHR	3	14	Carbamidomethyl@C	75	16	REAFDSVLGDTASCHR	1	127179	127194	0.539677	0.538925	0.362339	-0.439817	0.532765	0.534776	0.359208	-0.403807	42.3138	43.54	-1.22617	7	3	MOCK
776.86	67.1829	PDIA3|26_DVLELTDDNFESR_2	62.18	72.18	776.861	776.859	776.86	11824	2	27	4235.35	700480	65.4453	71.4403	PDIA3|26	DVLELTDDNFESR	2	NA	NA	52	13	DVLELTDDNFESR	2	68365	68377	0.52284	0.544743	0.366746	0.0186713	0.547163	0.565762	0.382836	-0.103181	70.5891	67.18	3.4091	7	3	MOCK
867.881	58.2026	HSP90B1|22_DDEVDVDGTVEEDLGK_2	53.2	63.2	867.882	867.88	867.881	9992	2	27	3718.2	1.51158e+06	56.3565	62.3218	HSP90B1|22	DDEVDVDGTVEEDLGK	2	NA	NA	74	16	DDEVDVDGTVEEDLGK	1	126699	126714	0.496189	0.508617	0.339686	0.560767	0.373005	0.390517	0.255408	-0.195499	61.9699	58.2	3.76993	7	3	MOCK
467.733	29.7107	CENPU|49_NSDVSSIGR_2	24.71	34.71	467.734	467.732	467.733	2511	2	27	1742.15	332642	27.853	33.8193	CENPU|49	NSDVSSIGR	2	NA	NA	11	9	NSDVSSIGR	1	9458	9466	0.481867	0.502422	0.335116	-0.218292	0.446961	0.471708	0.312724	-0.291606	29.0358	29.71	-0.674166	7	3	MOCK
764.835	69.703	ATF4|76_EDAFSGTDWMLEK_2	64.7	74.7	764.836	764.834	764.835	12411	2	27	4390.32	2.94275e+06	67.8277	73.7976	ATF4|76	EDAFSGTDWMLEK	2	NA	NA	42	13	EDAFSGTDWMLEK	2	50281	50293	0.449805	0.470694	0.311993	-0.00629616	0.458128	0.477443	0.316872	-0.00629616	73.172	69.7	3.47197	7	3	MOCK
443.882	22.4798	TNFRSF12A|28_REQAPGTAPCSR_3	17.48	27.48	443.884	443.882	443.883	1757	3	27	1549.9	4.25019e+06	20.7328	26.7176	TNFRSF12A|28	REQAPGTAPCSR	3	10	Carbamidomethyl@C	33	12	REQAPGTAPCSR	1	38857	38868	0.447592	0.466449	0.308934	-0.320719	0.473567	0.489701	0.325788	-0.320719	25.8316	22.48	3.35163	7	3	MOCK
448.569	33.1905	FKBP11|26_REAGLETESPVR_3	28.19	38.19	448.57	448.568	448.569	3190	3	27	1917.67	832394	31.1553	37.1451	FKBP11|26	REAGLETESPVR	3	NA	NA	39	12	REAGLETESPVR	1	44544	44555	0.422282	0.440893	0.290676	-0.326779	0.414267	0.434347	0.286042	-0.320719	31.9612	33.19	-1.22875	7	3	MOCK
605.827	72.7819	BCL2|130_FATVVEELFR_2	67.78	77.78	605.828	605.826	605.827	11871	2	27	4248.05	1227231	70.7659	76.7359	BCL2|130	FATVVEELFR	2	NA	NA	16	10	FATVVEELFR	1	14718	14727	0.371617	0.402204	0.263512	-0.281853	0.330131	0.365673	0.238323	-0.22278	70.8009	72.78	-1.97913	7	3	MOCK
681.355	58.8019	LSM3|7_REQQTTNTVEEPLDLIR_3	53.8	63.8	681.356	681.354	681.355	9695	3	27	3638.6	1.94605e+06	57.2172	63.1787	LSM3|7	REQQTTNTVEEPLDLIR	3	NA	NA	78	17	REQQTTNTVEEPLDLIR	3	133654	133670	0.364479	0.412512	0.270697	-0.44391	0.365443	0.412615	0.270769	-0.40728	60.6433	58.8	1.8433	7	3	MOCK
557.928	36.8535	FBLN1|30_RDVLLEACCADGHR_3	31.85	41.85	557.929	557.927	557.928	4172	3	27	2178.23	1.34553e+06	35.002	40.9679	FBLN1|30	RDVLLEACCADGHR	3	8;9	Carbamidomethyl@C;Carbamidomethyl@C	64	14	RDVLLEACCADGHR	1	92159	92172	0.340898	0.361777	0.23566	-0.516136	0.373044	0.390944	0.255702	-0.507428	36.3038	36.85	-0.546201	7	3	MOCK
848.393	68.08	UQCRHL|15_RDPEEEEEEEEELVDPLTTVR_3	63.08	73.08	848.394	848.392	848.393	11487	3	27	4145.44	981780	66.5657	72.528	UQCRHL|15	RDPEEEEEEEEELVDPLTTVR	3	NA	NA	84	21	RDPEEEEEEEEELVDPLTTVR	1	143761	143781	0.335583	0.351183	0.228441	0.307958	0.308797	0.326567	0.211784	-0.359927	69.0906	68.08	1.01063	7	3	MOCK
496.295	48.7357	ERN1|280_LTPTLYVGK_2	43.74	53.74	496.296	496.294	496.295	7587	2	27	3073.85	378212	46.9408	52.9214	ERN1|280	LTPTLYVGK	2	NA	NA	14	9	LTPTLYVGK	3	13074	13082	0.300363	0.37604	0.245429	0.0241935	0.569764	0.607856	0.415941	0.128116	51.2308	48.74	2.49078	7	3	MOCK
520.925	34.7462	CPSF7|33_RDVLTATSQPSDDR_3	29.75	39.75	520.926	520.924	520.925	3526	3	27	2007.2	324219	32.6494	38.6244	CPSF7|33	RDVLTATSQPSDDR	3	NA	NA	61	14	RDVLTATSQPSDDR	1	83826	83839	0.257801	0.288584	0.186369	-0.348374	0.289306	0.317235	0.205509	-0.301887	33.4533	34.75	-1.29669	7	3	MOCK
364.519	25.9378	CENPU|49_RDSDVSSIGR_3	20.94	30.94	364.521	364.519	364.519	2061	3	27	1627.92	1.19304e+06	23.9714	29.926	CENPU|49	RDSDVSSIGR	3	NA	NA	19	10	RDSDVSSIGR	1	19956	19965	0.2163	0.259267	0.166962	-0.22278	0.211862	0.254933	0.164107	-0.213771	27.1321	25.94	1.19206	7	3	MOCK
584.304	60.3621	P4HA3|29_DTFSALTSVAR_2	55.36	65.36	584.305	584.303	584.304	9434	2	27	3569.1	1.08855e+06	58.5984	64.5905	P4HA3|29	DTFSALTSVAR	2	NA	NA	27	11	DTFSALTSVAR	1	27800	27810	0.183759	0.232032	0.149075	-0.163321	0.16262	0.212867	0.13656	-0.231707	59.485	60.36	-0.875019	7	3	MOCK
794.019	50.9195	EIF4B|46_RDLEGDVSTTWHSNDDDVYR_3	45.92	55.92	794.02	794.018	794.019	7717	3	27	3108.02	539001	48.8257	54.793	EIF4B|46	RDLEGDVSTTWHSNDDDVYR	3	NA	NA	83	20	RDLEGDVSTTWHSNDDDVYR	1	140073	140092	0.159018	0.190459	0.121995	-0.158852	0.173723	0.203632	0.130549	-0.27203	51.8003	50.92	0.880276	7	3	MOCK
570.276	58.136	PDIA3|26_RDVLELTDDNFESR_3	53.14	63.14	570.277	570.275	570.276	9050	3	27	3467.64	449452	56.3486	62.3178	PDIA3|26	RDVLELTDDNFESR	3	NA	NA	65	14	RDVLELTDDNFESR	1	94629	94642	0.15587	0.19813	0.126974	-0.269956	0.175039	0.215438	0.138236	-0.361436	57.794	58.14	-0.345976	7	3	MOCK
557.299	44.2714	PLA2R1|21_EGVAAALTPER_2	39.27	49.27	557.3	557.298	557.299	5855	2	27	2619.76	1.11308e+06	42.3754	48.3242	PLA2R1|21	EGVAAALTPER	2	NA	NA	23	11	EGVAAALTPER	1	24760	24770	0.13946	0.195275	0.12512	-0.185272	0.12115	0.179054	0.114607	-0.260976	43.6627	44.27	-0.607313	7	3	MOCK
598.297	34.4875	ENG|26_RETVHCDLQPVGPER_3	29.49	39.49	598.298	598.296	598.297	3407	3	27	1976.05	202679	32.6842	38.6322	ENG|26	RETVHCDLQPVGPER	3	6	Carbamidomethyl@C	69	15	RETVHCDLQPVGPER	1	108353	108367	0.124971	0.163459	0.10453	-0.3838	0.0922308	0.134543	0.0859133	-0.438346	32.9342	34.49	-1.55576	7	3	MOCK
542.269	42.9302	CASP3|29_SGISLDNSYK_2	37.93	47.93	542.27	542.269	542.269	5924	2	27	2637.07	706411	41.3062	47.2726	CASP3|29	SGISLDNSYK	2	NA	NA	15	10	SGISLDNSYK	2	13998	14007	0.114312	0.174783	0.111845	-0.0879022	0.102264	0.16412	0.104957	-0.0969112	43.9511	42.93	1.02114	7	3	MOCK
630.957	51.6242	HSP90B1|22_RDDEVDVDGTVEEDLGK_3	46.62	56.62	630.958	630.956	630.957	7324	3	27	3002.79	1.60704e+06	50.0465	56.0419	HSP90B1|22	RDDEVDVDGTVEEDLGK	3	NA	NA	77	17	RDDEVDVDGTVEEDLGK	1	128934	128950	0.075626	0.114371	0.0729708	-0.11598	0.101469	0.140489	0.0897349	-0.205014	50.0465	51.62	-1.57352	7	3	MOCK
560.276	37.7312	FLNA|1502_RDADGTQTVNYVPSR_3	32.73	42.73	560.277	560.275	560.276	4623	3	27	2297.03	147293	35.9933	41.9282	FLNA|1502	RDADGTQTVNYVPSR	3	NA	NA	70	15	RDADGTQTVNYVPSR	1	111517	111531	0.03183	0.0840697	0.0535837	-0.421394	0.046005	0.0951547	0.0606692	-0.331476	38.2839	37.73	0.553852	7	3	MOCK
702.834	41.5014	CPSF7|33_DVLTATSQPSDDR_2	36.5	46.5	702.835	702.833	702.834	5473	2	27	2522.15	919428	39.8897	45.8254	CPSF7|33	DVLTATSQPSDDR	2	NA	NA	46	13	DVLTATSQPSDDR	1	57889	57901	0.0216257	0.0810019	0.0516239	-0.0606275	0.0185801	0.0785706	0.0500712	-0.243867	42.0358	41.5	0.535824	7	3	MOCK
576.587	27.2043	IGFBP4|22_RDEAIHCPPCSEEK_3	22.2	32.2	576.588	576.586	576.587	2281	3	27	1682.48	2249589	25.2636	31.2377	IGFBP4|22	RDEAIHCPPCSEEK	3	7;10	Carbamidomethyl@C;Carbamidomethyl@C	62	14	RDEAIHCPPCSEEK	1	86894	86907	0.00408855	0.0568157	0.0361896	-0.0683855	0.0421201	0.0916337	0.0584178	-0.291727	28.0413	27.2	0.841269	7	3	MOCK
786.327	31.4927	IGFBP4|22_DEAIHCPPCSEEK_2	26.49	36.49	786.328	786.326	786.327	2680	2	27	1784.19	161311	29.7365	35.7039	IGFBP4|22	DEAIHCPPCSEEK	2	6;9	Carbamidomethyl@C;Carbamidomethyl@C	54	13	DEAIHCPPCSEEK	0	70585	70597	0	0	0	0.0935193	0	0	0	-0.317846	29.7365	31.49	-1.75353	7	3	MOCK
559.957	43.3358	P4HB|18_RDAPEEEDHVLVLR_3	38.34	48.34	559.958	559.956	559.957	5327	3	27	2486.11	63689.5	41.4351	47.3833	P4HB|18	RDAPEEEDHVLVLR	3	NA	NA	55	14	RDAPEEEDHVLVLR	0	72685	72698	0	0	0	-0.614104	0	0	0	-0.578204	41.4351	43.34	-1.90486	7	3	MOCK
806.875	19.0125	SHMT2|27_QHSNAAQTQTGEANR_2	14.01	24.01	806.876	806.874	806.875	136	2	27	1050.91	22653.9	17.5152	23.5043	SHMT2|27	QHSNAAQTQTGEANR	2	NA	NA	67	15	QHSNAAQTQTGEANR	0	99057	99071	0	0	0	0.434211	0	0	0	-0.346719	17.5152	19.01	-1.49476	7	3	MOCK
590.614	17.8991	SHMT2|27_REHSNAAQTQTGEANR_3	12.9	22.9	590.615	590.613	590.614	1	3	27	993.468	8743.15	16.5578	22.5478	SHMT2|27	REHSNAAQTQTGEANR	3	NA	NA	73	16	REHSNAAQTQTGEANR	0	115899	115914	0	0	0	-0.0196999	0	0	0	-0.500528	16.5578	17.9	-1.3422	7	3	MOCK
773.895	53.205	PRTC08_ELGQSGVDTYLQTK_2	48.21	58.21	773.896	773.894	773.895	8074	2	27	3211.93	389101	51.2514	57.2442	PRTC08	ELGQSGVDTYLQTK	2	14	Label:13C(6)15N(2)@K	56	14	ELGQSGVDTYLQTk	12	75061	75074	0.988758	0.990725	0.913228	0.868906	0.931033	0.943411	0.784806	0.795526	53.5322	53.21	0.322185	8	3	MOCK
836.415	69.2789	SQSTM1|421_NYDIGAALDTIQYSK_2	64.28	74.28	836.416	836.414	836.415	11598	2	27	4186.41	11454294	67.4466	73.43	SQSTM1|421	NYDIGAALDTIQYSK	2	NA	NA	71	15	NYDIGAALDTIQYSK	16	113780	113794	0.987254	0.989064	0.905765	0.827341	0.984471	0.986655	0.89588	0.816405	69.7735	69.28	0.493481	8	3	MOCK
745.392	59.9233	PRTC11_SFANQPLEVVYSK_2	54.92	64.92	745.393	745.391	745.392	9082	2	27	3486.45	1.02364e+06	58.0126	64.0039	PRTC11	SFANQPLEVVYSK	2	13	Label:13C(6)15N(2)@K	45	13	SFANQPLEVVYSk	14	54662	54674	0.987092	0.988976	0.905386	0.856329	0.977006	0.980433	0.873857	0.845745	58.1074	59.92	-1.81257	8	3	MOCK
787.421	72.8278	PRTC15_LSSEAPALFQFDLK_2	67.83	77.83	787.422	787.42	787.421	12352	2	27	4385.71	11176010	70.8782	76.8413	PRTC15	LSSEAPALFQFDLK	2	14	Label:13C(6)15N(2)@K	63	14	LSSEAPALFQFDLk	16	88633	88646	0.974371	0.976918	0.862953	0.446939	0.943402	0.948484	0.794766	0.249466	73.0951	72.83	0.26512	8	3	MOCK
451.283	34.9206	PRTC04_DIPVPKPK_2	29.92	39.92	451.284	451.282	451.283	4285	2	27	2213.72	175653	33.4156	39.4074	PRTC04	DIPVPKPK	2	8	Label:13C(6)15N(2)@K	2	8	DIPVPKPk	5	1500	1507	0.967185	0.971747	0.84831	0.536946	0.961816	0.967014	0.83603	0.538041	36.8954	34.92	1.9754	8	3	MOCK
680.374	71.767	PRTC14_ELASGLSFPVGFK_2	66.77	76.77	680.375	680.372	680.373	12333	2	27	4380.56	996162	69.9279	75.9114	PRTC14	ELASGLSFPVGFK	2	13	Label:13C(6)15N(2)@K	48	13	ELASGLSFPVGFk	12	59894	59906	0.956347	0.964155	0.829031	0.56041	0.902278	0.917719	0.739944	0.602421	73.0094	71.77	1.23941	8	3	MOCK
761.381	51.6026	P4HB|18_DAPEEEDHVLVLR_2	46.6	56.6	761.382	761.38	761.381	7352	2	27	3020.37	711552	49.7813	55.7616	P4HB|18	DAPEEEDHVLVLR	2	NA	NA	51	13	DAPEEEDHVLVLR	17	63530	63542	0.955355	0.958705	0.81641	0.669941	0.893334	0.910204	0.728151	0.565241	50.3394	51.6	-1.26056	8	3	MOCK
682.849	48.3756	SSBP1|17_ESETTTSLVLER_2	43.38	53.38	682.85	682.848	682.849	6717	2	27	2849.34	2.49507e+06	46.7084	52.6576	SSBP1|17	ESETTTSLVLER	2	NA	NA	34	12	ESETTTSLVLER	11	39215	39226	0.953311	0.961044	0.821721	0.819803	0.946119	0.955368	0.809082	0.819803	47.489	48.38	-0.890984	8	3	MOCK
587.269	26.2323	TNFRSF12A|28_EQAPGTAPCSR_2	21.23	31.23	587.27	587.269	587.269	1724	2	27	1541.94	328744	24.3881	30.3377	TNFRSF12A|28	EQAPGTAPCSR	2	9	Carbamidomethyl@C	28	11	EQAPGTAPCSR	8	30117	30127	0.94114	0.949654	0.79713	0.553096	0.958503	0.964539	0.829956	0.478987	25.699	26.23	-0.530973	8	3	MOCK
415.74	33.151	MTHFD2|36_EAVVISGR_2	28.15	38.15	415.741	415.739	415.74	3159	2	27	1912.58	399176	31.3033	37.2535	MTHFD2|36	EAVVISGR	2	NA	NA	4	8	EAVVISGR	6	3327	3334	0.932591	0.944952	0.787784	0.633826	0.937448	0.948895	0.795593	0.633826	31.8764	33.15	-1.27362	8	3	MOCK
801.411	60.0386	PRTC10_GILFVGSGVSGGEEGAR_2	55.04	65.04	801.412	801.41	801.411	9403	2	27	3569.84	902209	58.4074	64.3824	PRTC10	GILFVGSGVSGGEEGAR	2	17	Label:13C(6)15N(4)@R	79	17	GILFVGSGVSGGEEGAr	14	135054	135070	0.927296	0.934589	0.768465	0.675526	0.63071	0.669472	0.466959	0.539744	59.4973	60.04	-0.542727	8	3	MOCK
364.519	25.9378	CENPU|49_RDSDVSSIGR_3	20.94	30.94	364.521	364.519	364.519	1531	3	27	1491.91	447913	23.9698	29.9529	CENPU|49	RDSDVSSIGR	3	NA	NA	19	10	RDSDVSSIGR	2	19181	19190	0.896035	0.891186	0.700252	-0.0734878	0.892828	0.888671	0.696741	-0.0734878	24.8651	25.94	-1.07486	8	3	MOCK
498.802	63.8572	PRTC12_LTILEELR_2	58.86	68.86	498.803	498.801	498.802	10457	2	27	3857.54	43011.7	62.0106	67.9808	PRTC12	LTILEELR	2	8	Label:13C(6)15N(4)@R	7	8	LTILEELr	6	6225	6232	0.893366	0.911125	0.72957	0.555556	0.519825	0.59365	0.404628	0.121784	64.2923	63.86	0.432285	8	3	MOCK
573.302	67.5684	PRTC13_NGFILDGFPR_2	62.57	72.57	573.303	573.301	573.302	10981	2	27	4016.73	472823	65.8395	71.8124	PRTC13	NGFILDGFPR	2	10	Label:13C(6)15N(4)@R	20	10	NGFILDGFPr	5	21107	21116	0.885227	0.900942	0.714247	0.750708	0.579724	0.611435	0.418815	0.502317	66.9454	67.57	-0.624562	8	3	MOCK
496.287	29.929	PRTC03_HVLTSIGEK_2	24.93	34.93	496.288	496.286	496.287	3075	2	27	1889.64	242068	28.1994	34.1824	PRTC03	HVLTSIGEK	2	9	Label:13C(6)15N(2)@K	13	9	HVLTSIGEk	2	11257	11265	0.865199	0.868599	0.669959	0.213526	0.885499	0.891151	0.700202	-0.126283	31.494	29.93	1.564	8	3	MOCK
758.338	44.9663	FBLN1|30_DVLLEACCADGHR_2	39.97	49.97	758.339	758.337	758.338	5837	2	27	2622.04	1.45843e+06	43.5951	49.5581	FBLN1|30	DVLLEACCADGHR	2	7;8	Carbamidomethyl@C;Carbamidomethyl@C	53	13	DVLLEACCADGHR	7	68450	68462	0.844395	0.865897	0.666504	0.146657	0.825487	0.850862	0.647839	0.128528	43.7007	44.97	-1.2693	8	3	MOCK
471.236	24.3151	ERO1A|24_REEQPPETAAQR_3	19.32	29.32	471.237	471.235	471.236	1415	3	27	1459.15	316220	22.4969	28.4784	ERO1A|24	REEQPPETAAQR	3	NA	NA	37	12	REEQPPETAAQR	1	42471	42482	0.828194	0.81346	0.604838	-0.314658	0.827076	0.814501	0.605978	-0.366032	24.3192	24.32	-0.000761	8	3	MOCK
493.768	26.3416	PRTC01_SSAAPPPPPR_2	21.34	31.34	493.769	493.767	493.768	2665	2	27	1782.16	373144	24.5402	30.5066	PRTC01	SSAAPPPPPR	2	10	Label:13C(6)15N(4)@R	18	10	SSAAPPPPPr	4	18533	18542	0.823073	0.840703	0.635716	0.214672	0.642198	0.685284	0.480644	0.277735	29.7027	26.34	3.36265	8	3	MOCK
867.881	58.2026	HSP90B1|22_DDEVDVDGTVEEDLGK_2	53.2	63.2	867.882	867.88	867.881	8756	2	27	3397.61	217986	56.3417	62.3161	HSP90B1|22	DDEVDVDGTVEEDLGK	2	NA	NA	74	16	DDEVDVDGTVEEDLGK	1	123754	123769	0.81172	0.812577	0.603872	0.564046	0.660557	0.651383	0.451622	-0.19222	56.6268	58.2	-1.57322	8	3	MOCK
628.299	27.7828	ERO1A|24_EEQPPETAAQR_2	22.78	32.78	628.3	628.298	628.299	2199	2	27	1662.87	316496	25.788	31.7442	ERO1A|24	EEQPPETAAQR	2	NA	NA	22	11	EEQPPETAAQR	2	23247	23257	0.80996	0.816791	0.608498	0.0747654	0.898067	0.895887	0.706918	-0.0741088	27.7145	27.78	-0.065464	8	3	MOCK
760.356	53.4877	BAX|66_IGDELDSNMELQR_2	48.49	58.49	760.357	760.356	760.356	8030	2	27	3199.97	270605	51.673	57.6267	BAX|66	IGDELDSNMELQR	2	NA	NA	44	13	IGDELDSNMELQR	4	52874	52886	0.805724	0.811418	0.602608	-0.00092268	0.792499	0.799602	0.589913	-0.0104755	53.3328	53.49	-0.157192	8	3	MOCK
761.368	41.0085	FLNA|1502_NADGTQTVNYVPSR_2	36.01	46.01	761.369	761.367	761.368	5127	2	27	2438.89	162837	39.4462	45.4084	FLNA|1502	NADGTQTVNYVPSR	2	NA	NA	60	14	NADGTQTVNYVPSR	1	81795	81808	0.804091	0.786857	0.576586	-0.248186	0.799862	0.783407	0.57304	-0.195893	40.6482	41.01	-0.361772	8	3	MOCK
695.832	45.6162	PRTC06_TASEFDSAIAQDK_2	40.62	50.62	695.833	695.831	695.832	6027	2	27	2672.16	5.33261e+06	43.6384	49.6133	PRTC06	TASEFDSAIAQDK	2	13	Label:13C(6)15N(2)@K	43	13	TASEFDSAIAQDk	15	50606	50618	0.78766	0.82803	0.621076	0.413917	0.867066	0.889583	0.698009	0.39074	44.5359	45.62	-1.08407	8	3	MOCK
558.326	56.6711	PRTC09_GLILVGGYGTR_2	51.67	61.67	558.327	558.325	558.326	9694	2	27	3647.29	382960	55.058	61.0392	PRTC09	GLILVGGYGTR	2	11	Label:13C(6)15N(4)@R	29	11	GLILVGGYGTr	3	33327	33337	0.785617	0.803351	0.593903	0.640994	0.656858	0.684103	0.479612	0.352251	60.7882	56.67	4.11824	8	3	MOCK
507.602	41.2944	SSBP1|17_RESETTTSLVLER_3	36.29	46.29	507.603	507.601	507.602	6106	3	27	2692.36	648867	39.4965	45.485	SSBP1|17	RESETTTSLVLER	3	NA	NA	49	13	RESETTTSLVLER	2	63134	63146	0.781352	0.776174	0.565684	-0.239687	0.755921	0.755296	0.545013	-0.190838	44.8727	41.29	3.58268	8	3	MOCK
818.891	39.83	ENG|26_ETVHCDLQPVGPER_2	34.83	44.83	818.892	818.89	818.891	4739	2	27	2333.41	84067.3	38.174	44.1023	ENG|26	ETVHCDLQPVGPER	2	5	Carbamidomethyl@C	58	14	ETVHCDLQPVGPER	5	79559	79572	0.770849	0.790825	0.580697	0.0331683	0.868921	0.874693	0.677875	0.0335098	38.8901	39.83	-0.939885	8	3	MOCK
427.226	43.2527	CALR|18_EPAVYFK_2	38.25	48.25	427.227	427.225	427.226	5392	2	27	2508.79	432690	41.6307	47.5813	CALR|18	EPAVYFK	2	NA	NA	1	7	EPAVYFK	4	24	30	0.765908	0.802291	0.592772	0.627391	0.782756	0.815939	0.607559	0.647391	41.8131	43.25	-1.43686	8	3	MOCK
560.276	37.7312	FLNA|1502_RDADGTQTVNYVPSR_3	32.73	42.73	560.277	560.275	560.276	4293	3	27	2215.59	177835	35.9894	41.9317	FLNA|1502	RDADGTQTVNYVPSR	3	NA	NA	70	15	RDADGTQTVNYVPSR	1	110560	110574	0.746026	0.728267	0.519348	-0.376282	0.740547	0.726224	0.517453	-0.290123	36.9266	37.73	-0.803436	8	3	MOCK
613.317	30.6463	PRTC02_GISNEGQNASIK_2	25.65	35.65	613.318	613.316	613.317	2819	2	27	1820.5	2.87722e+06	28.8725	34.8372	PRTC02	GISNEGQNASIK	2	12	Label:13C(6)15N(2)@K	40	12	GISNEGQNASIk	14	46431	46442	0.744836	0.7867	0.576425	0.551022	0.565593	0.620428	0.426082	0.163073	30.3416	30.65	-0.308398	8	3	MOCK
422.736	38.5693	PRTC05_IGDYAGIK_2	33.57	43.57	422.737	422.735	422.736	4508	2	27	2273.44	4963291	36.9071	42.883	PRTC05	IGDYAGIK	2	8	Label:13C(6)15N(2)@K	6	8	IGDYAGIk	8	4615	4622	0.744118	0.781579	0.571171	0.6341	0.200194	0.333648	0.216559	0.411877	37.8906	38.57	-0.679412	8	3	MOCK
586.8	46.4127	PRTC07_SAAGAFGPELSR_2	41.41	51.41	586.801	586.799	586.8	6417	2	27	2772.63	18432694	44.5328	50.4848	PRTC07	SAAGAFGPELSR	2	12	Label:13C(6)15N(4)@R	32	12	SAAGAFGPELSr	14	33836	33847	0.688571	0.737752	0.528225	0.70451	0.333967	0.425777	0.279998	0.344538	46.2105	46.41	-0.199549	8	3	MOCK
554.272	47.8065	HSP90B1|24_REVDVDGTVEEDLGK_3	42.81	52.81	554.273	554.271	554.272	7418	3	27	3037.96	503290	45.912	51.8841	HSP90B1|24	REVDVDGTVEEDLGK	3	NA	NA	68	15	REVDVDGTVEEDLGK	2	107326	107340	0.657082	0.660568	0.459369	0.00126451	0.639017	0.642685	0.444359	-0.154751	50.6326	47.81	2.82261	8	3	MOCK
832.87	52.702	TMEM59|36_EAFDSVLGDTASCHR_2	47.7	57.7	832.871	832.869	832.87	8446	2	27	3312.41	546583	50.88	56.8415	TMEM59|36	EAFDSVLGDTASCHR	2	13	Carbamidomethyl@C	66	15	EAFDSVLGDTASCHR	1	97904	97918	0.626902	0.627941	0.432204	-0.380041	0.618022	0.620522	0.426158	-0.293882	55.2069	52.7	2.50686	8	3	MOCK
594.299	39.5989	FKBP11|26_EAGLETESPVR_2	34.6	44.6	594.3	594.298	594.299	5551	2	27	2548.43	236310	37.8612	43.8372	FKBP11|26	EAGLETESPVR	2	NA	NA	26	11	EAGLETESPVR	1	27137	27147	0.598722	0.60338	0.41236	-0.0605066	0.601302	0.60634	0.414726	-0.0605066	42.4738	39.6	2.87385	8	3	MOCK
329.53	27.6908	MTHFD2|36_REAVVISGR_3	22.69	32.69	329.531	329.529	329.53	1965	3	27	1604.29	1.01027e+06	25.7175	31.7015	MTHFD2|36	REAVVISGR	3	NA	NA	10	9	REAVVISGR	1	7977	7985	0.550791	0.564065	0.381527	-0.218292	0.543374	0.557813	0.376719	-0.137463	26.7382	27.69	-0.951785	8	3	MOCK
607.616	43.539	TMEM59|36_REAFDSVLGDTASCHR_3	38.54	48.54	607.617	607.615	607.616	5535	3	27	2544.25	5.39757e+06	41.411	47.3595	TMEM59|36	REAFDSVLGDTASCHR	3	14	Carbamidomethyl@C	75	16	REAFDSVLGDTASCHR	1	126784	126799	0.539677	0.538925	0.362339	-0.439817	0.532765	0.534776	0.359208	-0.403807	42.4042	43.54	-1.13575	8	3	MOCK
776.86	67.1829	PDIA3|26_DVLELTDDNFESR_2	62.18	72.18	776.861	776.859	776.86	10997	2	27	4021.14	774242	65.4495	71.4305	PDIA3|26	DVLELTDDNFESR	2	NA	NA	52	13	DVLELTDDNFESR	1	66554	66566	0.477893	0.489548	0.325676	-0.0811985	0.516666	0.523393	0.350668	-0.20305	67.019	67.18	-0.161022	8	3	MOCK
764.835	69.703	ATF4|76_EDAFSGTDWMLEK_2	64.7	74.7	764.836	764.834	764.835	12368	2	27	4390.18	3164057	67.8294	73.807	ATF4|76	EDAFSGTDWMLEK	2	NA	NA	42	13	EDAFSGTDWMLEK	2	50066	50078	0.449822	0.470217	0.311649	-0.00629616	0.457849	0.476683	0.316322	-0.00629616	73.1696	69.7	3.4696	8	3	MOCK
448.569	33.1905	FKBP11|26_REAGLETESPVR_3	28.19	38.19	448.57	448.568	448.569	3186	3	27	1920.06	523064	31.1833	37.148	FKBP11|26	REAGLETESPVR	3	NA	NA	39	12	REAGLETESPVR	1	44385	44396	0.422282	0.440893	0.290676	-0.326779	0.414267	0.434347	0.286042	-0.320719	32.001	33.19	-1.18896	8	3	MOCK
752.854	54.3255	HSP90B1|24_EVDVDGTVEEDLGK_2	49.33	59.33	752.855	752.853	752.854	8827	2	27	3416.76	974148	52.5594	58.4966	HSP90B1|24	EVDVDGTVEEDLGK	2	NA	NA	57	14	EVDVDGTVEEDLGK	3	78571	78584	0.373685	0.427153	0.280967	0.142022	0.314101	0.377674	0.246552	0.00486642	56.9461	54.33	2.61606	8	3	MOCK
605.827	72.7819	BCL2|130_FATVVEELFR_2	67.78	77.78	605.828	605.826	605.827	11836	2	27	4249.42	462734	70.7525	76.7378	BCL2|130	FATVVEELFR	2	NA	NA	16	10	FATVVEELFR	1	14645	14654	0.371617	0.402204	0.263512	-0.281853	0.330131	0.365673	0.238323	-0.22278	70.8236	72.78	-1.95638	8	3	MOCK
557.299	44.2714	PLA2R1|21_EGVAAALTPER_2	39.27	49.27	557.3	557.298	557.299	6179	2	27	2711.46	308294	42.3792	48.3374	PLA2R1|21	EGVAAALTPER	2	NA	NA	23	11	EGVAAALTPER	1	24997	25007	0.369899	0.396941	0.259856	-0.156004	0.386608	0.411647	0.270093	-0.217073	45.191	44.27	0.920953	8	3	MOCK
557.928	36.8535	FBLN1|30_RDVLLEACCADGHR_3	31.85	41.85	557.929	557.927	557.928	4162	3	27	2180.36	1.22937e+06	35.0033	40.9645	FBLN1|30	RDVLLEACCADGHR	3	8;9	Carbamidomethyl@C;Carbamidomethyl@C	64	14	RDVLLEACCADGHR	1	91844	91857	0.340898	0.361777	0.23566	-0.516136	0.373044	0.390944	0.255702	-0.507428	36.3394	36.85	-0.510606	8	3	MOCK
848.393	68.08	UQCRHL|15_RDPEEEEEEEEELVDPLTTVR_3	63.08	73.08	848.394	848.392	848.393	11426	3	27	4139.25	317798	66.5607	72.5529	UQCRHL|15	RDPEEEEEEEEELVDPLTTVR	3	NA	NA	84	21	RDPEEEEEEEEELVDPLTTVR	1	143260	143280	0.335583	0.351183	0.228441	0.307958	0.308797	0.326567	0.211784	-0.359927	68.9876	68.08	0.907574	8	3	MOCK
496.295	48.7357	ERN1|280_LTPTLYVGK_2	43.74	53.74	496.296	496.294	496.295	7156	2	27	2966.92	319222	46.9513	52.9002	ERN1|280	LTPTLYVGK	2	NA	NA	14	9	LTPTLYVGK	2	12513	12521	0.281673	0.34876	0.226794	-0.0976906	0.512381	0.548397	0.369524	-0.00513196	49.4486	48.74	0.70864	8	3	MOCK
598.297	34.4875	ENG|26_RETVHCDLQPVGPER_3	29.49	39.49	598.298	598.296	598.297	3389	3	27	1974.87	284217	32.6951	38.6509	ENG|26	RETVHCDLQPVGPER	3	6	Carbamidomethyl@C	69	15	RETVHCDLQPVGPER	3	107956	107970	0.234291	0.288016	0.185991	-0.251025	0.243485	0.298021	0.192653	-0.305571	32.9144	34.49	-1.57555	8	3	MOCK
576.587	27.2043	IGFBP4|22_RDEAIHCPPCSEEK_3	22.2	32.2	576.588	576.586	576.587	2020	3	27	1618.23	530900	25.253	31.2299	IGFBP4|22	RDEAIHCPPCSEEK	3	7;10	Carbamidomethyl@C;Carbamidomethyl@C	62	14	RDEAIHCPPCSEEK	1	86111	86124	0.217726	0.25228	0.162361	-0.0335524	0.245078	0.277312	0.178887	-0.256894	26.9705	27.2	-0.22947	8	3	MOCK
584.304	60.3621	P4HA3|29_DTFSALTSVAR_2	55.36	65.36	584.305	584.303	584.304	9413	2	27	3572.78	735573	58.6244	64.5859	P4HA3|29	DTFSALTSVAR	2	NA	NA	27	11	DTFSALTSVAR	1	27717	27727	0.183759	0.232032	0.149075	-0.163321	0.16262	0.212867	0.13656	-0.231707	59.5463	60.36	-0.813663	8	3	MOCK
570.276	58.136	PDIA3|26_RDVLELTDDNFESR_3	53.14	63.14	570.277	570.275	570.276	9014	3	27	3467.89	515886	56.3665	62.3122	PDIA3|26	RDVLELTDDNFESR	3	NA	NA	65	14	RDVLELTDDNFESR	1	94288	94301	0.15587	0.19813	0.126974	-0.269956	0.175039	0.215438	0.138236	-0.361436	57.7981	58.14	-0.341865	8	3	MOCK
443.882	22.4798	TNFRSF12A|28_REQAPGTAPCSR_3	17.48	27.48	443.884	443.882	443.883	1282	3	27	1417.29	383844	20.7288	26.6891	TNFRSF12A|28	REQAPGTAPCSR	3	10	Carbamidomethyl@C	33	12	REQAPGTAPCSR	1	37411	37422	0.149599	0.194427	0.12457	-0.33284	0.181997	0.224736	0.144304	-0.326779	23.6214	22.48	1.14145	8	3	MOCK
520.925	34.7462	CPSF7|33_RDVLTATSQPSDDR_3	29.75	39.75	520.926	520.924	520.925	4177	3	27	2184.59	1416918	32.6602	38.6082	CPSF7|33	RDVLTATSQPSDDR	3	NA	NA	61	14	RDVLTATSQPSDDR	1	84577	84590	0.128744	0.169961	0.108728	-0.361436	0.122854	0.163468	0.104536	-0.314949	36.4098	34.75	1.65981	8	3	MOCK
542.269	42.9302	CASP3|29_SGISLDNSYK_2	37.93	47.93	542.27	542.269	542.269	5273	2	27	2478.3	167993	41.3051	47.2855	CASP3|29	SGISLDNSYK	2	NA	NA	15	10	SGISLDNSYK	1	13385	13394	0.113802	0.167208	0.10695	-0.166667	0.102605	0.157242	0.100521	-0.175676	41.3051	42.93	-1.62492	8	3	MOCK
630.957	51.6242	HSP90B1|22_RDDEVDVDGTVEEDLGK_3	46.62	56.62	630.958	630.956	630.957	7872	3	27	3158.54	628940	50.0651	56.0319	HSP90B1|22	RDDEVDVDGTVEEDLGK	3	NA	NA	77	17	RDDEVDVDGTVEEDLGK	2	129742	129758	0.0984806	0.151405	0.0967595	-0.0478939	0.121479	0.175708	0.112443	-0.139904	52.6423	51.62	1.02225	8	3	MOCK
559.957	43.3358	P4HB|18_RDAPEEEDHVLVLR_3	38.34	48.34	559.958	559.956	559.957	5773	3	27	2605.26	1.04179e+06	41.3953	47.3517	P4HB|18	RDAPEEEDHVLVLR	3	NA	NA	55	14	RDAPEEEDHVLVLR	1	73020	73033	0.0711127	0.126404	0.0806874	-0.533552	0.0884607	0.138609	0.088526	-0.493298	43.4209	43.34	0.08094	8	3	MOCK
702.834	41.5014	CPSF7|33_DVLTATSQPSDDR_2	36.5	46.5	702.835	702.833	702.834	6160	2	27	2706.3	425622	39.8752	45.8636	CPSF7|33	DVLTATSQPSDDR	2	NA	NA	46	13	DVLTATSQPSDDR	1	58478	58490	0.0684206	0.12287	0.0784196	-0.0504234	0.0548874	0.111019	0.0708226	-0.238765	45.1049	41.5	3.60494	8	3	MOCK
794.019	50.9195	EIF4B|46_RDLEGDVSTTWHSNDDDVYR_3	45.92	55.92	794.02	794.018	794.019	7503	3	27	3060.68	293242	48.8269	54.8023	EIF4B|46	RDLEGDVSTTWHSNDDDVYR	3	NA	NA	83	20	RDLEGDVSTTWHSNDDDVYR	1	139215	139234	0.0619241	0.101874	0.0649675	-0.171155	0.0671875	0.106163	0.0677134	-0.282283	51.0114	50.92	0.091351	8	3	MOCK
681.355	58.8019	LSM3|7_REQQTTNTVEEPLDLIR_3	53.8	63.8	681.356	681.354	681.355	9314	3	27	3546.72	393591	57.2288	63.1971	LSM3|7	REQQTTNTVEEPLDLIR	3	NA	NA	78	17	REQQTTNTVEEPLDLIR	1	132510	132526	0.0534922	0.0992866	0.0633122	-0.421589	0.0583611	0.10242	0.0653172	-0.384959	59.112	58.8	0.312039	8	3	MOCK
467.733	29.7107	CENPU|49_NSDVSSIGR_2	24.71	34.71	467.734	467.732	467.733	2257	2	27	1677.75	806014	27.8273	33.8178	CENPU|49	NSDVSSIGR	2	NA	NA	11	9	NSDVSSIGR	1	9177	9185	0.0302008	0.107747	0.0687273	-0.286474	0.0241629	0.103136	0.0657757	-0.359787	27.9625	29.71	-1.74751	8	3	MOCK
590.614	17.8991	SHMT2|27_REHSNAAQTQTGEANR_3	12.9	22.9	590.615	590.613	590.614	458	3	27	1157.83	18145.8	16.5544	22.5479	SHMT2|27	REHSNAAQTQTGEANR	3	NA	NA	73	16	REHSNAAQTQTGEANR	1	119899	119914	0.00753492	0.0560797	0.0357202	0.0442345	0.0709495	0.122359	0.0780916	-0.439872	19.2972	17.9	1.39721	8	3	MOCK
337.187	35.4809	CALR|18_REPAVYFK_3	30.48	40.48	337.188	337.186	337.187	3446	3	27	1990.42	35866.2	33.1736	39.1271	CALR|18	REPAVYFK	3	NA	NA	3	8	REPAVYFK	0	2032	2039	0	0	0	-0.557198	0	0	0	-0.319376	33.1736	35.48	-2.30638	8	3	MOCK
786.327	31.4927	IGFBP4|22_DEAIHCPPCSEEK_2	26.49	36.49	786.328	786.326	786.327	2670	2	27	1783.24	198222	29.7206	35.7024	IGFBP4|22	DEAIHCPPCSEEK	2	6;9	Carbamidomethyl@C;Carbamidomethyl@C	54	13	DEAIHCPPCSEEK	0	70334	70346	0	0	0	0.0935193	0	0	0	-0.317846	29.7206	31.49	-1.7694	8	3	MOCK
806.875	19.0125	SHMT2|27_QHSNAAQTQTGEANR_2	14.01	24.01	806.876	806.874	806.875	135	2	27	1050.32	10203	17.5053	23.4989	SHMT2|27	QHSNAAQTQTGEANR	2	NA	NA	67	15	QHSNAAQTQTGEANR	0	98702	98716	0	0	0	0.434211	0	0	0	-0.346719	17.5053	19.01	-1.5047	8	3	MOCK
745.392	59.9233	PRTC11_SFANQPLEVVYSK_2	54.92	64.92	745.393	745.391	745.392	9303	2	27	3541.12	26798206	58.0146	63.9861	PRTC11	SFANQPLEVVYSK	2	13	Label:13C(6)15N(2)@K	45	13	SFANQPLEVVYSk	15	54943	54955	0.987429	0.989289	0.906738	0.915979	0.962071	0.967788	0.837976	0.783489	59.0187	59.92	-0.901305	9	3	MG132
836.415	69.2789	SQSTM1|421_NYDIGAALDTIQYSK_2	64.28	74.28	836.416	836.414	836.415	11585	2	27	4177.24	4.62233e+06	67.4657	73.422	SQSTM1|421	NYDIGAALDTIQYSK	2	NA	NA	71	15	NYDIGAALDTIQYSK	17	113860	113874	0.987013	0.988773	0.904514	0.773103	0.984516	0.986588	0.895618	0.761825	69.6206	69.28	0.340615	9	3	MG132
773.895	53.205	PRTC08_ELGQSGVDTYLQTK_2	48.21	58.21	773.896	773.894	773.895	7879	2	27	3158.98	9887745	51.275	57.2426	PRTC08	ELGQSGVDTYLQTK	2	14	Label:13C(6)15N(2)@K	56	14	ELGQSGVDTYLQTk	15	74752	74765	0.984511	0.987176	0.897937	0.683471	0.907051	0.923595	0.749527	0.726458	52.6496	53.21	-0.560358	9	3	MG132
787.421	72.8278	PRTC15_LSSEAPALFQFDLK_2	67.83	77.83	787.422	787.42	787.421	12376	2	27	4385.44	5.07576e+06	70.8767	76.8385	PRTC15	LSSEAPALFQFDLK	2	14	Label:13C(6)15N(2)@K	63	14	LSSEAPALFQFDLk	17	88727	88740	0.967289	0.970474	0.844915	0.257022	0.93112	0.937335	0.77343	0.289806	73.0907	72.83	0.260721	9	3	MG132
415.74	33.151	MTHFD2|36_EAVVISGR_2	28.15	38.15	415.741	415.739	415.74	3142	2	27	1914.19	201033	31.3112	37.2708	MTHFD2|36	EAVVISGR	2	NA	NA	4	8	EAVVISGR	6	3339	3346	0.952754	0.959746	0.818755	0.646415	0.960051	0.965812	0.833053	0.646415	31.9032	33.15	-1.24683	9	3	MG132
761.381	51.6026	P4HB|18_DAPEEEDHVLVLR_2	46.6	56.6	761.382	761.38	761.381	7272	2	27	2998.58	262554	49.7847	55.7416	P4HB|18	DAPEEEDHVLVLR	2	NA	NA	51	13	DAPEEEDHVLVLR	11	63343	63355	0.952294	0.957565	0.813876	0.5901	0.858778	0.870384	0.672259	0.32094	49.9763	51.6	-1.62365	9	3	MG132
682.849	48.3756	SSBP1|17_ESETTTSLVLER_2	43.38	53.38	682.85	682.848	682.849	6685	2	27	2841.73	2.63775e+06	46.7302	52.6767	SSBP1|17	ESETTTSLVLER	2	NA	NA	34	12	ESETTTSLVLER	11	39102	39113	0.950045	0.95791	0.814639	0.819521	0.943619	0.952864	0.803758	0.819521	47.3621	48.38	-1.0179	9	3	MG132
451.283	34.9206	PRTC04_DIPVPKPK_2	29.92	39.92	451.284	451.282	451.283	3815	2	27	2093.64	1.44475e+06	33.4406	39.4041	PRTC04	DIPVPKPK	2	8	Label:13C(6)15N(2)@K	2	8	DIPVPKPk	10	1106	1113	0.949808	0.956421	0.811364	0.651888	0.951314	0.957782	0.814355	0.67214	34.8941	34.92	-0.025941	9	3	MG132
680.374	71.767	PRTC14_ELASGLSFPVGFK_2	66.77	76.77	680.375	680.372	680.373	12198	2	27	4336.69	2.84912e+06	69.9278	75.9046	PRTC14	ELASGLSFPVGFK	2	13	Label:13C(6)15N(2)@K	48	13	ELASGLSFPVGFk	12	59551	59563	0.931493	0.942141	0.782381	0.853072	0.812179	0.84098	0.636042	0.911908	72.2782	71.77	0.508243	9	3	MG132
764.835	69.703	ATF4|76_EDAFSGTDWMLEK_2	64.7	74.7	764.836	764.834	764.835	11577	2	27	4175.15	3336317	67.8178	73.813	ATF4|76	EDAFSGTDWMLEK	2	NA	NA	42	13	EDAFSGTDWMLEK	5	48571	48583	0.93005	0.930266	0.760848	0.349327	0.905053	0.906967	0.723217	0.349436	69.5858	69.7	-0.114172	9	3	MG132
587.269	26.2323	TNFRSF12A|28_EQAPGTAPCSR_2	21.23	31.23	587.27	587.269	587.269	1694	2	27	1537.98	91621.8	24.381	30.3656	TNFRSF12A|28	EQAPGTAPCSR	2	9	Carbamidomethyl@C	28	11	EQAPGTAPCSR	5	30060	30070	0.929277	0.929278	0.759139	0.432927	0.909977	0.91469	0.735131	0.343996	25.6331	26.23	-0.59692	9	3	MG132
801.411	60.0386	PRTC10_GILFVGSGVSGGEEGAR_2	55.04	65.04	801.412	801.41	801.411	9174	2	27	3508.82	722155	58.4075	64.3809	PRTC10	GILFVGSGVSGGEEGAR	2	17	Label:13C(6)15N(4)@R	79	17	GILFVGSGVSGGEEGAr	10	134784	134800	0.928545	0.934914	0.769047	0.680563	0.658302	0.692648	0.487112	0.437866	58.4803	60.04	-1.55968	9	3	MG132
498.802	63.8572	PRTC12_LTILEELR_2	58.86	68.86	498.803	498.801	498.802	10558	2	27	3884.33	29795.8	61.9975	67.9675	PRTC12	LTILEELR	2	8	Label:13C(6)15N(4)@R	7	8	LTILEELr	4	6475	6482	0.906565	0.912699	0.732011	0.305145	0.747542	0.781497	0.571088	0.175698	64.7388	63.86	0.878847	9	3	MG132
573.302	67.5684	PRTC13_NGFILDGFPR_2	62.57	72.57	573.303	573.301	573.302	11498	2	27	4153.56	49284.4	65.8459	71.8268	PRTC13	NGFILDGFPR	2	10	Label:13C(6)15N(4)@R	20	10	NGFILDGFPr	5	21846	21855	0.898868	0.912343	0.731458	0.749678	0.649627	0.67474	0.471489	0.494852	69.2261	67.57	1.65605	9	3	MG132
496.287	29.929	PRTC03_HVLTSIGEK_2	24.93	34.93	496.288	496.286	496.287	3150	2	27	1916.19	571158	28.2159	34.1642	PRTC03	HVLTSIGEK	2	9	Label:13C(6)15N(2)@K	13	9	HVLTSIGEk	4	11417	11425	0.875389	0.888388	0.696349	0.480205	0.885398	0.897183	0.70878	0.130132	31.9364	29.93	2.00643	9	3	MG132
628.299	27.7828	ERO1A|24_EEQPPETAAQR_2	22.78	32.78	628.3	628.298	628.299	2153	2	27	1659.24	294311	25.7849	31.7417	ERO1A|24	EEQPPETAAQR	2	NA	NA	22	11	EEQPPETAAQR	3	23190	23200	0.871456	0.878474	0.682876	0.203189	0.960133	0.957703	0.814179	0.061257	27.654	27.78	-0.125961	9	3	MG132
471.236	24.3151	ERO1A|24_REEQPPETAAQR_3	19.32	29.32	471.237	471.235	471.236	1401	3	27	1454.67	81730.8	22.5061	28.4628	ERO1A|24	REEQPPETAAQR	3	NA	NA	37	12	REEQPPETAAQR	1	42369	42380	0.828194	0.81346	0.604838	-0.314658	0.827076	0.814501	0.605978	-0.366032	24.2445	24.32	-0.075458	9	3	MG132
761.368	41.0085	FLNA|1502_NADGTQTVNYVPSR_2	36.01	46.01	761.369	761.367	761.368	5079	2	27	2431.65	215276	39.4476	45.4087	FLNA|1502	NADGTQTVNYVPSR	2	NA	NA	60	14	NADGTQTVNYVPSR	1	81850	81863	0.804091	0.786857	0.576586	-0.248186	0.799862	0.783407	0.57304	-0.195893	40.5276	41.01	-0.482439	9	3	MG132
558.326	56.6711	PRTC09_GLILVGGYGTR_2	51.67	61.67	558.327	558.325	558.326	9438	2	27	3576.56	3.31033e+06	55.0687	61.0324	PRTC09	GLILVGGYGTR	2	11	Label:13C(6)15N(4)@R	29	11	GLILVGGYGTr	4	32950	32960	0.793114	0.814636	0.606126	0.754878	0.707558	0.733873	0.524578	0.460507	59.6093	56.67	2.93931	9	3	MG132
695.832	45.6162	PRTC06_TASEFDSAIAQDK_2	40.62	50.62	695.833	695.831	695.832	6055	2	27	2680.82	2.68482e+06	43.6714	49.6164	PRTC06	TASEFDSAIAQDK	2	13	Label:13C(6)15N(2)@K	43	13	TASEFDSAIAQDk	12	50563	50575	0.7882	0.828604	0.621729	0.602366	0.867675	0.890124	0.698765	0.579299	44.6803	45.62	-0.939746	9	3	MG132
570.276	58.136	PDIA3|26_RDVLELTDDNFESR_3	53.14	63.14	570.277	570.275	570.276	9336	3	27	3549.53	1095871	56.3611	62.3261	PDIA3|26	RDVLELTDDNFESR	3	NA	NA	65	14	RDVLELTDDNFESR	1	94928	94941	0.775623	0.755985	0.545684	-0.248186	0.777842	0.757788	0.54744	-0.344019	59.1589	58.14	1.01891	9	3	MG132
427.226	43.2527	CALR|18_EPAVYFK_2	38.25	48.25	427.227	427.225	427.226	5332	2	27	2497.04	577111	41.6173	47.597	CALR|18	EPAVYFK	2	NA	NA	1	7	EPAVYFK	6	0	6	0.768269	0.806687	0.597483	0.626087	0.777373	0.813517	0.6049	0.645217	41.6173	43.25	-1.6327	9	3	MG132
493.768	26.3416	PRTC01_SSAAPPPPPR_2	21.34	31.34	493.769	493.767	493.768	2426	2	27	1730.4	589074	24.5359	30.4995	PRTC01	SSAAPPPPPR	2	10	Label:13C(6)15N(4)@R	18	10	SSAAPPPPPr	7	18345	18354	0.766355	0.801976	0.592436	0.299871	0.659978	0.710738	0.503277	0.175804	28.84	26.34	2.49997	9	3	MG132
760.356	53.4877	BAX|66_IGDELDSNMELQR_2	48.49	58.49	760.357	760.356	760.356	8033	2	27	3199.46	347425	51.6546	57.6275	BAX|66	IGDELDSNMELQR	2	NA	NA	44	13	IGDELDSNMELQR	6	52807	52819	0.765132	0.792898	0.582857	0.134173	0.753231	0.782745	0.572362	0.12462	53.3244	53.49	-0.165622	9	3	MG132
818.891	39.83	ENG|26_ETVHCDLQPVGPER_2	34.83	44.83	818.892	818.89	818.891	4708	2	27	2330.96	56600.7	38.1533	44.1233	ENG|26	ETVHCDLQPVGPER	2	5	Carbamidomethyl@C	58	14	ETVHCDLQPVGPER	2	79614	79627	0.753214	0.750818	0.540681	-0.237386	0.585372	0.601409	0.410787	-0.24174	38.8494	39.83	-0.98059	9	3	MG132
613.317	30.6463	PRTC02_GISNEGQNASIK_2	25.65	35.65	613.318	613.316	613.317	2760	2	27	1813.17	1.63421e+06	28.8556	34.8113	PRTC02	GISNEGQNASIK	2	12	Label:13C(6)15N(2)@K	40	12	GISNEGQNASIk	13	46296	46307	0.745761	0.789407	0.579224	0.625722	0.553488	0.61111	0.418553	0.231008	30.2196	30.65	-0.430445	9	3	MG132
422.736	38.5693	PRTC05_IGDYAGIK_2	33.57	43.57	422.737	422.735	422.736	4484	2	27	2272.23	12582609	36.8874	42.8693	PRTC05	IGDYAGIK	2	8	Label:13C(6)15N(2)@K	6	8	IGDYAGIk	8	4627	4634	0.744595	0.781726	0.571321	0.6341	0.196071	0.329822	0.213977	0.411877	37.8705	38.57	-0.699471	9	3	MG132
586.8	46.4127	PRTC07_SAAGAFGPELSR_2	41.41	51.41	586.801	586.799	586.8	6509	2	27	2796.47	3194256	44.5424	50.477	PRTC07	SAAGAFGPELSR	2	12	Label:13C(6)15N(4)@R	32	12	SAAGAFGPELSr	8	33910	33921	0.688988	0.728218	0.519303	0.421423	0.37108	0.445477	0.293932	0.512192	46.6078	46.41	0.19783	9	3	MG132
752.854	54.3255	HSP90B1|24_EVDVDGTVEEDLGK_2	49.33	59.33	752.855	752.853	752.854	8932	2	27	3443.02	1.40272e+06	52.5417	58.4996	HSP90B1|24	EVDVDGTVEEDLGK	2	NA	NA	57	14	EVDVDGTVEEDLGK	1	78847	78860	0.673968	0.665295	0.463389	-0.0204901	0.634671	0.623679	0.428725	-0.14057	57.3836	54.33	3.05364	9	3	MG132
758.338	44.9663	FBLN1|30_DVLLEACCADGHR_2	39.97	49.97	758.339	758.337	758.338	5821	2	27	2620.99	794180	43.5831	49.5603	FBLN1|30	DVLLEACCADGHR	2	7;8	Carbamidomethyl@C;Carbamidomethyl@C	53	13	DVLLEACCADGHR	2	68431	68443	0.672655	0.678204	0.474483	-0.327888	0.675162	0.683893	0.479429	-0.332881	43.6832	44.97	-1.28684	9	3	MG132
507.602	41.2944	SSBP1|17_RESETTTSLVLER_3	36.29	46.29	507.603	507.601	507.602	6046	3	27	2678.56	280059	39.4979	45.4421	SSBP1|17	RESETTTSLVLER	3	NA	NA	49	13	RESETTTSLVLER	1	63043	63055	0.644106	0.635765	0.43863	-0.354538	0.61643	0.612613	0.419763	-0.305688	44.6427	41.29	3.35274	9	3	MG132
554.272	47.8065	HSP90B1|24_REVDVDGTVEEDLGK_3	42.81	52.81	554.273	554.271	554.272	6486	3	27	2790.6	454097	45.9067	51.9011	HSP90B1|24	REVDVDGTVEEDLGK	3	NA	NA	68	15	REVDVDGTVEEDLGK	1	105628	105642	0.63066	0.625538	0.430241	-0.0873206	0.605321	0.600671	0.4102	-0.243336	46.51	47.81	-1.3	9	3	MG132
594.299	39.5989	FKBP11|26_EAGLETESPVR_2	34.6	44.6	594.3	594.298	594.299	5493	2	27	2537.26	284028	37.8744	43.8181	FKBP11|26	EAGLETESPVR	2	NA	NA	26	11	EAGLETESPVR	1	27080	27090	0.598722	0.60338	0.41236	-0.0605066	0.601302	0.60634	0.414726	-0.0605066	42.2877	39.6	2.68768	9	3	MG132
337.187	35.4809	CALR|18_REPAVYFK_3	30.48	40.48	337.188	337.186	337.187	3468	3	27	2001.55	80633.4	33.1599	39.124	CALR|18	REPAVYFK	3	NA	NA	3	8	REPAVYFK	1	2072	2079	0.576975	0.58882	0.400815	-0.35769	0.511381	0.532973	0.357851	-0.134647	33.3591	35.48	-2.12089	9	3	MG132
329.53	27.6908	MTHFD2|36_REAVVISGR_3	22.69	32.69	329.531	329.529	329.53	2129	3	27	1653.23	449385	25.7112	31.699	MTHFD2|36	REAVVISGR	3	NA	NA	10	9	REAVVISGR	1	8225	8233	0.5508	0.564073	0.381533	-0.206928	0.543374	0.557813	0.376719	-0.1261	27.5538	27.69	-0.136206	9	3	MG132
584.304	60.3621	P4HA3|29_DTFSALTSVAR_2	55.36	65.36	584.305	584.303	584.304	9898	2	27	3699.49	876903	58.6198	64.5853	P4HA3|29	DTFSALTSVAR	2	NA	NA	27	11	DTFSALTSVAR	2	28320	28330	0.543508	0.574324	0.38947	-0.0199813	0.529837	0.562414	0.380255	-0.0883678	61.6581	60.36	1.2981	9	3	MG132
776.86	67.1829	PDIA3|26_DVLELTDDNFESR_2	62.18	72.18	776.861	776.859	776.86	11713	2	27	4209.6	984208	65.4482	71.4216	PDIA3|26	DVLELTDDNFESR	2	NA	NA	52	13	DVLELTDDNFESR	2	67939	67951	0.541028	0.559462	0.377985	0.0285497	0.546153	0.563361	0.380984	-0.0933022	70.16	67.18	2.98003	9	3	MG132
607.616	43.539	TMEM59|36_REAFDSVLGDTASCHR_3	38.54	48.54	607.617	607.615	607.616	5489	3	27	2535.83	7.60905e+06	41.412	47.3817	TMEM59|36	REAFDSVLGDTASCHR	3	14	Carbamidomethyl@C	75	16	REAFDSVLGDTASCHR	1	126903	126918	0.539677	0.538925	0.362339	-0.439817	0.532765	0.534776	0.359208	-0.403807	42.2638	43.54	-1.27619	9	3	MG132
467.733	29.7107	CENPU|49_NSDVSSIGR_2	24.71	34.71	467.734	467.732	467.733	2265	2	27	1688.53	326225	27.8289	33.7975	CENPU|49	NSDVSSIGR	2	NA	NA	11	9	NSDVSSIGR	1	9249	9257	0.481867	0.502422	0.335116	-0.218292	0.446961	0.471708	0.312724	-0.291606	28.1421	29.71	-1.56789	9	3	MG132
443.882	22.4798	TNFRSF12A|28_REQAPGTAPCSR_3	17.48	27.48	443.884	443.882	443.883	1753	3	27	1554.13	764202	20.7286	26.7161	TNFRSF12A|28	REQAPGTAPCSR	3	10	Carbamidomethyl@C	33	12	REQAPGTAPCSR	1	38684	38695	0.447592	0.466449	0.308934	-0.320719	0.473567	0.489701	0.325788	-0.320719	25.9022	22.48	3.42216	9	3	MG132
448.569	33.1905	FKBP11|26_REAGLETESPVR_3	28.19	38.19	448.57	448.568	448.569	3145	3	27	1914.8	4318405	31.1582	37.1307	FKBP11|26	REAGLETESPVR	3	NA	NA	39	12	REAGLETESPVR	1	44239	44250	0.422282	0.440893	0.290676	-0.326779	0.414267	0.434347	0.286042	-0.320719	31.9133	33.19	-1.27672	9	3	MG132
605.827	72.7819	BCL2|130_FATVVEELFR_2	67.78	77.78	605.828	605.826	605.827	11876	2	27	4253.76	5.99258e+06	70.7474	76.7349	BCL2|130	FATVVEELFR	2	NA	NA	16	10	FATVVEELFR	1	14736	14745	0.371617	0.402204	0.263512	-0.281853	0.330131	0.365673	0.238323	-0.22278	70.896	72.78	-1.88402	9	3	MG132
560.276	37.7312	FLNA|1502_RDADGTQTVNYVPSR_3	32.73	42.73	560.277	560.275	560.276	4269	3	27	2214.41	339413	35.9719	41.9612	FLNA|1502	RDADGTQTVNYVPSR	3	NA	NA	70	15	RDADGTQTVNYVPSR	1	110696	110710	0.370747	0.389769	0.25489	-0.380041	0.387691	0.405615	0.265886	-0.293882	36.9069	37.73	-0.823097	9	3	MG132
557.299	44.2714	PLA2R1|21_EGVAAALTPER_2	39.27	49.27	557.3	557.298	557.299	6163	2	27	2709.02	96310	42.3695	48.3261	PLA2R1|21	EGVAAALTPER	2	NA	NA	23	11	EGVAAALTPER	1	24970	24980	0.369899	0.396941	0.259856	-0.156004	0.386608	0.411647	0.270093	-0.217073	45.1503	44.27	0.880315	9	3	MG132
557.928	36.8535	FBLN1|30_RDVLLEACCADGHR_3	31.85	41.85	557.929	557.927	557.928	4122	3	27	2174.98	731021	35.011	40.9766	FBLN1|30	RDVLLEACCADGHR	3	8;9	Carbamidomethyl@C;Carbamidomethyl@C	64	14	RDVLLEACCADGHR	1	91886	91899	0.340898	0.361777	0.23566	-0.516136	0.373044	0.390944	0.255702	-0.507428	36.2497	36.85	-0.600259	9	3	MG132
496.295	48.7357	ERN1|280_LTPTLYVGK_2	43.74	53.74	496.296	496.294	496.295	6796	2	27	2870.79	130638	46.9266	52.923	ERN1|280	LTPTLYVGK	2	NA	NA	14	9	LTPTLYVGK	2	12137	12145	0.278146	0.349543	0.227326	-0.0976906	0.49578	0.538696	0.362165	-0.00513196	47.8465	48.74	-0.893455	9	3	MG132
520.925	34.7462	CPSF7|33_RDVLTATSQPSDDR_3	29.75	39.75	520.926	520.924	520.925	3448	3	27	1995.96	351473	32.6547	38.6004	CPSF7|33	RDVLTATSQPSDDR	3	NA	NA	61	14	RDVLTATSQPSDDR	1	83579	83592	0.257801	0.288584	0.186369	-0.348374	0.289306	0.317235	0.205509	-0.301887	33.266	34.75	-1.48397	9	3	MG132
794.019	50.9195	EIF4B|46_RDLEGDVSTTWHSNDDDVYR_3	45.92	55.92	794.02	794.018	794.019	7883	3	27	3159.92	394212	48.8316	54.7844	EIF4B|46	RDLEGDVSTTWHSNDDDVYR	3	NA	NA	83	20	RDLEGDVSTTWHSNDDDVYR	1	140334	140353	0.221733	0.247678	0.159335	-0.156801	0.231577	0.256561	0.165179	-0.269979	52.6653	50.92	1.7453	9	3	MG132
364.519	25.9378	CENPU|49_RDSDVSSIGR_3	20.94	30.94	364.521	364.519	364.519	2019	3	27	1625.28	311983	23.9655	29.9553	CENPU|49	RDSDVSSIGR	3	NA	NA	19	10	RDSDVSSIGR	1	19848	19857	0.2163	0.259267	0.166962	-0.22278	0.211862	0.254933	0.164107	-0.213771	27.088	25.94	1.14796	9	3	MG132
542.269	42.9302	CASP3|29_SGISLDNSYK_2	37.93	47.93	542.27	542.269	542.269	6151	2	27	2705.99	213848	41.3095	47.2627	CASP3|29	SGISLDNSYK	2	NA	NA	15	10	SGISLDNSYK	2	14214	14223	0.125278	0.196733	0.126066	-0.0703989	0.112654	0.185686	0.118901	-0.0794079	45.0998	42.93	2.16978	9	3	MG132
598.297	34.4875	ENG|26_RETVHCDLQPVGPER_3	29.49	39.49	598.298	598.296	598.297	3366	3	27	1974.48	179190	32.6895	38.6415	ENG|26	RETVHCDLQPVGPER	3	6	Carbamidomethyl@C	69	15	RETVHCDLQPVGPER	1	108092	108106	0.124971	0.163459	0.10453	-0.3838	0.0922308	0.134543	0.0859133	-0.438346	32.9079	34.49	-1.58208	9	3	MG132
630.957	51.6242	HSP90B1|22_RDDEVDVDGTVEEDLGK_3	46.62	56.62	630.958	630.956	630.957	8227	3	27	3250.95	1.1395e+06	50.0654	56.0283	HSP90B1|22	RDDEVDVDGTVEEDLGK	3	NA	NA	77	17	RDDEVDVDGTVEEDLGK	2	130720	130736	0.102428	0.15672	0.100184	-0.0478939	0.128209	0.183626	0.117567	-0.139904	54.1825	51.62	2.56253	9	3	MG132
681.355	58.8019	LSM3|7_REQQTTNTVEEPLDLIR_3	53.8	63.8	681.356	681.354	681.355	9394	3	27	3564.77	769073	57.2272	63.1788	LSM3|7	REQQTTNTVEEPLDLIR	3	NA	NA	78	17	REQQTTNTVEEPLDLIR	1	132864	132880	0.0819594	0.125094	0.0798463	-0.41582	0.106647	0.146462	0.0935771	-0.37342	59.4129	58.8	0.612855	9	3	MG132
702.834	41.5014	CPSF7|33_DVLTATSQPSDDR_2	36.5	46.5	702.835	702.833	702.834	6100	2	27	2692.68	485938	39.8777	45.8268	CPSF7|33	DVLTATSQPSDDR	2	NA	NA	46	13	DVLTATSQPSDDR	1	58387	58399	0.0684206	0.12287	0.0784196	-0.0504234	0.0548874	0.111019	0.0708226	-0.238765	44.8779	41.5	3.37794	9	3	MG132
832.87	52.702	TMEM59|36_EAFDSVLGDTASCHR_2	47.7	57.7	832.871	832.869	832.87	7922	2	27	3170.18	428025	50.8697	56.8394	TMEM59|36	EAFDSVLGDTASCHR	2	13	Carbamidomethyl@C	66	15	EAFDSVLGDTASCHR	1	96934	96948	0.0603492	0.103684	0.0661262	-0.398838	0.101115	0.140629	0.0898249	-0.305161	52.8364	52.7	0.136374	9	3	MG132
576.587	27.2043	IGFBP4|22_RDEAIHCPPCSEEK_3	22.2	32.2	576.588	576.586	576.587	2708	3	27	1800.53	496931	25.2469	31.2387	IGFBP4|22	RDEAIHCPPCSEEK	3	7;10	Carbamidomethyl@C;Carbamidomethyl@C	62	14	RDEAIHCPPCSEEK	1	87336	87349	0.00408855	0.0568157	0.0361896	-0.0683855	0.0421201	0.0916337	0.0584178	-0.291727	30.0089	27.2	2.80888	9	3	MG132
786.327	31.4927	IGFBP4|22_DEAIHCPPCSEEK_2	26.49	36.49	786.328	786.326	786.327	2638	2	27	1783.65	147326	29.7276	35.711	IGFBP4|22	DEAIHCPPCSEEK	2	6;9	Carbamidomethyl@C;Carbamidomethyl@C	54	13	DEAIHCPPCSEEK	0	70339	70351	0	0	0	0.0935193	0	0	0	-0.317846	29.7276	31.49	-1.76245	9	3	MG132
559.957	43.3358	P4HB|18_RDAPEEEDHVLVLR_3	38.34	48.34	559.958	559.956	559.957	5277	3	27	2483.82	80792.5	41.3969	47.3739	P4HB|18	RDAPEEEDHVLVLR	3	NA	NA	55	14	RDAPEEEDHVLVLR	0	72451	72464	0	0	0	-0.614104	0	0	0	-0.578204	41.3969	43.34	-1.94307	9	3	MG132
806.875	19.0125	SHMT2|27_QHSNAAQTQTGEANR_2	14.01	24.01	806.876	806.874	806.875	135	2	27	1050.53	16500.2	17.5089	23.5005	SHMT2|27	QHSNAAQTQTGEANR	2	NA	NA	67	15	QHSNAAQTQTGEANR	0	98810	98824	0	0	0	0.434211	0	0	0	-0.346719	17.5089	19.01	-1.50114	9	3	MG132
590.614	17.8991	SHMT2|27_REHSNAAQTQTGEANR_3	12.9	22.9	590.615	590.613	590.614	1	3	27	993.481	15810.7	16.558	22.5528	SHMT2|27	REHSNAAQTQTGEANR	3	NA	NA	73	16	REHSNAAQTQTGEANR	0	115638	115653	0	0	0	-0.0196999	0	0	0	-0.500528	16.558	17.9	-1.34198	9	3	MG132
867.881	58.2026	HSP90B1|22_DDEVDVDGTVEEDLGK_2	53.2	63.2	867.882	867.88	867.881	8701	2	27	3380.27	102523	56.3379	62.33	HSP90B1|22	DDEVDVDGTVEEDLGK	2	NA	NA	74	16	DDEVDVDGTVEEDLGK	0	123768	123783	0	0	0	0.467324	0	0	0	-0.288941	56.3379	58.2	-1.86212	9	3	MG132
848.393	68.08	UQCRHL|15_RDPEEEEEEEEELVDPLTTVR_3	63.08	73.08	848.394	848.392	848.393	10927	3	27	3996.65	1.02787e+06	66.5652	72.5488	UQCRHL|15	RDPEEEEEEEEELVDPLTTVR	3	NA	NA	84	21	RDPEEEEEEEEELVDPLTTVR	0	141666	141686	0	0	0	0.238514	0	0	0	-0.429372	66.6108	68.08	-1.46922	9	3	MG132
745.392	59.9233	PRTC11_SFANQPLEVVYSK_2	54.92	64.92	745.393	745.391	745.392	9330	2	27	3549.38	8707270	58.0151	63.9868	PRTC11	SFANQPLEVVYSK	2	13	Label:13C(6)15N(2)@K	45	13	SFANQPLEVVYSk	15	55015	55027	0.987906	0.989724	0.908657	0.915328	0.967153	0.97214	0.849374	0.790545	59.1563	59.92	-0.763702	10	3	MG132
836.415	69.2789	SQSTM1|421_NYDIGAALDTIQYSK_2	64.28	74.28	836.416	836.414	836.415	11600	2	27	4183.46	18767264	67.4536	73.4338	SQSTM1|421	NYDIGAALDTIQYSK	2	NA	NA	71	15	NYDIGAALDTIQYSK	18	113786	113800	0.987717	0.989609	0.908145	0.82512	0.984421	0.986808	0.896478	0.813841	69.7243	69.28	0.444295	10	3	MG132
773.895	53.205	PRTC08_ELGQSGVDTYLQTK_2	48.21	58.21	773.896	773.894	773.895	7857	2	27	3156.37	14313621	51.2774	57.2441	PRTC08	ELGQSGVDTYLQTK	2	14	Label:13C(6)15N(2)@K	56	14	ELGQSGVDTYLQTk	15	74665	74678	0.984945	0.987507	0.899266	0.680142	0.903761	0.920742	0.744832	0.722104	52.6062	53.21	-0.603767	10	3	MG132
787.421	72.8278	PRTC15_LSSEAPALFQFDLK_2	67.83	77.83	787.422	787.42	787.421	12366	2	27	4386	8641853	70.8476	76.8414	PRTC15	LSSEAPALFQFDLK	2	14	Label:13C(6)15N(2)@K	63	14	LSSEAPALFQFDLk	12	88666	88679	0.969086	0.972014	0.849032	0.558781	0.930792	0.936774	0.772407	0.449671	73.1	72.83	0.269988	10	3	MG132
451.283	34.9206	PRTC04_DIPVPKPK_2	29.92	39.92	451.284	451.282	451.283	3864	2	27	2105.99	1.88124e+06	33.4437	39.4083	PRTC04	DIPVPKPK	2	8	Label:13C(6)15N(2)@K	2	8	DIPVPKPk	9	1142	1149	0.9516	0.958012	0.814864	0.741653	0.950976	0.957511	0.813756	0.761357	35.0999	34.92	0.179879	10	3	MG132
682.849	48.3756	SSBP1|17_ESETTTSLVLER_2	43.38	53.38	682.85	682.848	682.849	6680	2	27	2843.18	1.84617e+06	46.7145	52.6737	SSBP1|17	ESETTTSLVLER	2	NA	NA	34	12	ESETTTSLVLER	10	39127	39138	0.949592	0.957499	0.813729	0.751938	0.943266	0.952534	0.803067	0.751938	47.3863	48.38	-0.993661	10	3	MG132
761.381	51.6026	P4HB|18_DAPEEEDHVLVLR_2	46.6	56.6	761.382	761.38	761.381	7277	2	27	3003.07	337309	49.7769	55.7459	P4HB|18	DAPEEEDHVLVLR	2	NA	NA	51	13	DAPEEEDHVLVLR	10	63367	63379	0.948807	0.953328	0.804734	0.487571	0.80941	0.821132	0.613314	0.160443	50.0512	51.6	-1.54875	10	3	MG132
587.269	26.2323	TNFRSF12A|28_EQAPGTAPCSR_2	21.23	31.23	587.27	587.269	587.269	1711	2	27	1542.27	161594	24.3776	30.3406	TNFRSF12A|28	EQAPGTAPCSR	2	9	Carbamidomethyl@C	28	11	EQAPGTAPCSR	6	30084	30094	0.940597	0.944862	0.787608	0.535178	0.949082	0.953659	0.805434	0.453752	25.7045	26.23	-0.525456	10	3	MG132
415.74	33.151	MTHFD2|36_EAVVISGR_2	28.15	38.15	415.741	415.739	415.74	3140	2	27	1912.29	391608	31.2993	37.2588	MTHFD2|36	EAVVISGR	2	NA	NA	4	8	EAVVISGR	5	3326	3333	0.940045	0.949026	0.795858	0.524904	0.948586	0.956124	0.810719	0.524904	31.8715	33.15	-1.27846	10	3	MG132
680.374	71.767	PRTC14_ELASGLSFPVGFK_2	66.77	76.77	680.375	680.372	680.373	12238	2	27	4350.86	390054	69.9292	75.9108	PRTC14	ELASGLSFPVGFK	2	13	Label:13C(6)15N(2)@K	48	13	ELASGLSFPVGFk	11	59647	59659	0.935527	0.944625	0.787148	0.78718	0.837266	0.86162	0.6611	0.849707	72.5144	71.77	0.744405	10	3	MG132
801.411	60.0386	PRTC10_GILFVGSGVSGGEEGAR_2	55.04	65.04	801.412	801.41	801.411	9590	2	27	3618.16	491621	58.4076	64.3814	PRTC10	GILFVGSGVSGGEEGAR	2	17	Label:13C(6)15N(4)@R	79	17	GILFVGSGVSGGEEGAr	13	135489	135505	0.931358	0.93837	0.775329	0.735188	0.648149	0.685435	0.480776	0.489652	60.3027	60.04	0.262677	10	3	MG132
498.802	63.8572	PRTC12_LTILEELR_2	58.86	68.86	498.803	498.801	498.802	10080	2	27	3749.01	138898	61.9948	67.9856	PRTC12	LTILEELR	2	8	Label:13C(6)15N(4)@R	7	8	LTILEELr	5	5692	5699	0.89855	0.91104	0.729438	0.424193	0.593422	0.652224	0.452328	0.294745	62.4834	63.86	-1.37655	10	3	MG132
573.302	67.5684	PRTC13_NGFILDGFPR_2	62.57	72.57	573.303	573.301	573.302	11471	2	27	4148.62	64095.5	65.8475	71.8119	PRTC13	NGFILDGFPR	2	10	Label:13C(6)15N(4)@R	20	10	NGFILDGFPr	6	21802	21811	0.896017	0.911373	0.729952	0.63462	0.612856	0.641491	0.443367	0.379279	69.1436	67.57	1.57363	10	3	MG132
760.356	53.4877	BAX|66_IGDELDSNMELQR_2	48.49	58.49	760.357	760.356	760.356	8034	2	27	3202.6	365838	51.6576	57.6279	BAX|66	IGDELDSNMELQR	2	NA	NA	44	13	IGDELDSNMELQR	6	52843	52855	0.879492	0.889172	0.697438	0.201151	0.873096	0.883487	0.689621	0.201259	53.3767	53.49	-0.113317	10	3	MG132
496.287	29.929	PRTC03_HVLTSIGEK_2	24.93	34.93	496.288	496.286	496.287	3104	2	27	1902.41	171946	28.2279	34.1649	PRTC03	HVLTSIGEK	2	9	Label:13C(6)15N(2)@K	13	9	HVLTSIGEk	3	11317	11325	0.871825	0.882081	0.687715	0.357038	0.872978	0.884399	0.690863	0.0172287	31.7069	29.93	1.77687	10	3	MG132
764.835	69.703	ATF4|76_EDAFSGTDWMLEK_2	64.7	74.7	764.836	764.834	764.835	11568	2	27	4175.17	2.93156e+06	67.8361	73.7957	ATF4|76	EDAFSGTDWMLEK	2	NA	NA	42	13	EDAFSGTDWMLEK	3	48595	48607	0.849957	0.849295	0.645946	0.148665	0.821282	0.822072	0.614364	0.14378	69.5861	69.7	-0.113909	10	3	MG132
761.368	41.0085	FLNA|1502_NADGTQTVNYVPSR_2	36.01	46.01	761.369	761.367	761.368	5082	2	27	2432.13	276157	39.4518	45.4235	FLNA|1502	NADGTQTVNYVPSR	2	NA	NA	60	14	NADGTQTVNYVPSR	2	81789	81802	0.833469	0.827153	0.620082	-0.141467	0.821226	0.816408	0.608075	-0.0891744	40.5355	41.01	-0.474486	10	3	MG132
471.236	24.3151	ERO1A|24_REEQPPETAAQR_3	19.32	29.32	471.237	471.235	471.236	1399	3	27	1455.76	351984	22.4947	28.4723	ERO1A|24	REEQPPETAAQR	3	NA	NA	37	12	REEQPPETAAQR	1	42405	42416	0.828194	0.81346	0.604838	-0.314658	0.827076	0.814501	0.605978	-0.366032	24.2627	24.32	-0.057259	10	3	MG132
493.768	26.3416	PRTC01_SSAAPPPPPR_2	21.34	31.34	493.769	493.767	493.768	2686	2	27	1792.54	500654	24.53	30.5058	PRTC01	SSAAPPPPPR	2	10	Label:13C(6)15N(4)@R	18	10	SSAAPPPPPr	4	18553	18562	0.811735	0.831979	0.625584	0.197941	0.532452	0.591499	0.402927	0.244015	29.8757	26.34	3.53569	10	3	MG132
628.299	27.7828	ERO1A|24_EEQPPETAAQR_2	22.78	32.78	628.3	628.298	628.299	2152	2	27	1656.69	630125	25.7659	31.7418	ERO1A|24	EEQPPETAAQR	2	NA	NA	22	11	EEQPPETAAQR	2	23164	23174	0.805516	0.812583	0.603879	0.0747654	0.898437	0.896111	0.707238	-0.0741088	27.6114	27.78	-0.16857	10	3	MG132
558.326	56.6711	PRTC09_GLILVGGYGTR_2	51.67	61.67	558.327	558.325	558.326	9084	2	27	3486.29	4.58891e+06	55.0475	61.0346	PRTC09	GLILVGGYGTR	2	11	Label:13C(6)15N(4)@R	29	11	GLILVGGYGTr	4	32514	32524	0.80021	0.819252	0.611222	0.755816	0.580449	0.616527	0.422922	0.460319	58.1048	56.67	1.43483	10	3	MG132
695.832	45.6162	PRTC06_TASEFDSAIAQDK_2	40.62	50.62	695.833	695.831	695.832	6038	2	27	2678.37	8494669	43.6708	49.6312	PRTC06	TASEFDSAIAQDK	2	13	Label:13C(6)15N(2)@K	43	13	TASEFDSAIAQDk	12	50563	50575	0.792393	0.831191	0.624681	0.734694	0.866825	0.889194	0.697469	0.579299	44.6394	45.62	-0.980576	10	3	MG132
570.276	58.136	PDIA3|26_RDVLELTDDNFESR_3	53.14	63.14	570.277	570.275	570.276	9783	3	27	3669.99	592362	56.3659	62.3232	PDIA3|26	RDVLELTDDNFESR	3	NA	NA	65	14	RDVLELTDDNFESR	1	95595	95608	0.775623	0.755985	0.545684	-0.248186	0.777842	0.757788	0.54744	-0.344019	61.1666	58.14	3.02656	10	3	MG132
427.226	43.2527	CALR|18_EPAVYFK_2	38.25	48.25	427.227	427.225	427.226	5348	2	27	2501.97	535089	41.6101	47.5805	CALR|18	EPAVYFK	2	NA	NA	1	7	EPAVYFK	5	12	18	0.769034	0.807441	0.598296	0.766957	0.776698	0.813056	0.604396	0.786087	41.6995	43.25	-1.55054	10	3	MG132
818.891	39.83	ENG|26_ETVHCDLQPVGPER_2	34.83	44.83	818.892	818.89	818.891	4711	2	27	2331.65	50373.6	38.1671	44.1241	ENG|26	ETVHCDLQPVGPER	2	5	Carbamidomethyl@C	58	14	ETVHCDLQPVGPER	2	79566	79579	0.767073	0.763595	0.553135	-0.237386	0.628829	0.640298	0.442378	-0.24174	38.8608	39.83	-0.969226	10	3	MG132
752.854	54.3255	HSP90B1|24_EVDVDGTVEEDLGK_2	49.33	59.33	752.855	752.853	752.854	8903	2	27	3436.51	2.04197e+06	52.5372	58.4968	HSP90B1|24	EVDVDGTVEEDLGK	2	NA	NA	57	14	EVDVDGTVEEDLGK	3	78747	78760	0.745825	0.756842	0.546518	0.171903	0.670358	0.686977	0.482125	0.0391873	57.2751	54.33	2.9451	10	3	MG132
422.736	38.5693	PRTC05_IGDYAGIK_2	33.57	43.57	422.737	422.735	422.736	4503	2	27	2277.11	10182192	36.9073	42.8683	PRTC05	IGDYAGIK	2	8	Label:13C(6)15N(2)@K	6	8	IGDYAGIk	8	4628	4635	0.744319	0.781746	0.571342	0.6341	0.19723	0.331209	0.214913	0.411877	37.9518	38.57	-0.618183	10	3	MG132
613.317	30.6463	PRTC02_GISNEGQNASIK_2	25.65	35.65	613.318	613.316	613.317	2791	2	27	1818.34	1654417	28.8685	34.8135	PRTC02	GISNEGQNASIK	2	12	Label:13C(6)15N(2)@K	40	12	GISNEGQNASIk	11	46365	46376	0.743663	0.784779	0.574447	0.630726	0.565236	0.619531	0.425354	0.36117	30.3057	30.65	-0.344273	10	3	MG132
560.276	37.7312	FLNA|1502_RDADGTQTVNYVPSR_3	32.73	42.73	560.277	560.275	560.276	5028	3	27	2417.54	362365	35.985	41.9558	FLNA|1502	RDADGTQTVNYVPSR	3	NA	NA	70	15	RDADGTQTVNYVPSR	2	111994	112008	0.715687	0.717462	0.509392	-0.280314	0.709605	0.713871	0.506119	-0.194156	40.2924	37.73	2.56237	10	3	MG132
586.8	46.4127	PRTC07_SAAGAFGPELSR_2	41.41	51.41	586.801	586.799	586.8	6593	2	27	2820.76	1.89443e+06	44.5448	50.479	PRTC07	SAAGAFGPELSR	2	12	Label:13C(6)15N(4)@R	32	12	SAAGAFGPELSr	14	34023	34034	0.685907	0.733633	0.524354	0.702537	0.324718	0.415164	0.272552	0.348626	47.0126	46.41	0.602598	10	3	MG132
598.297	34.4875	ENG|26_RETVHCDLQPVGPER_3	29.49	39.49	598.298	598.296	598.297	3402	3	27	1982.96	64738.7	32.6888	38.646	ENG|26	RETVHCDLQPVGPER	3	6	Carbamidomethyl@C	69	15	RETVHCDLQPVGPER	1	108032	108046	0.658285	0.657014	0.456361	-0.376282	0.821978	0.805877	0.596612	-0.415789	33.0493	34.49	-1.44074	10	3	MG132
794.019	50.9195	EIF4B|46_RDLEGDVSTTWHSNDDDVYR_3	45.92	55.92	794.02	794.018	794.019	7009	3	27	2930.91	271410	48.8175	54.7927	EIF4B|46	RDLEGDVSTTWHSNDDDVYR	3	NA	NA	83	20	RDLEGDVSTTWHSNDDDVYR	1	137892	137911	0.653543	0.641649	0.443499	-0.146548	0.676157	0.663304	0.461693	-0.261777	48.8485	50.92	-2.07146	10	3	MG132
554.272	47.8065	HSP90B1|24_REVDVDGTVEEDLGK_3	42.81	52.81	554.273	554.271	554.272	7382	3	27	3031.07	788729	45.9317	51.8964	HSP90B1|24	REVDVDGTVEEDLGK	3	NA	NA	68	15	REVDVDGTVEEDLGK	2	107276	107290	0.650995	0.649699	0.45021	0.00126451	0.628648	0.627709	0.432014	-0.154751	50.5178	47.81	2.70783	10	3	MG132
507.602	41.2944	SSBP1|17_RESETTTSLVLER_3	36.29	46.29	507.603	507.601	507.602	6062	3	27	2684.41	284791	39.5021	45.4568	SSBP1|17	RESETTTSLVLER	3	NA	NA	49	13	RESETTTSLVLER	1	63055	63067	0.644106	0.635765	0.43863	-0.354538	0.61643	0.612613	0.419763	-0.305688	44.7401	41.29	3.45011	10	3	MG132
832.87	52.702	TMEM59|36_EAFDSVLGDTASCHR_2	47.7	57.7	832.871	832.869	832.87	8635	2	27	3363.5	922056	50.8768	56.8392	TMEM59|36	EAFDSVLGDTASCHR	2	13	Carbamidomethyl@C	66	15	EAFDSVLGDTASCHR	1	98344	98358	0.626902	0.627941	0.432204	-0.380041	0.618022	0.620522	0.426158	-0.293882	56.0584	52.7	3.35836	10	3	MG132
594.299	39.5989	FKBP11|26_EAGLETESPVR_2	34.6	44.6	594.3	594.298	594.299	5519	2	27	2544.7	325644	37.8559	43.8198	FKBP11|26	EAGLETESPVR	2	NA	NA	26	11	EAGLETESPVR	1	27094	27104	0.598722	0.60338	0.41236	-0.0605066	0.601302	0.60634	0.414726	-0.0605066	42.4116	39.6	2.81161	10	3	MG132
337.187	35.4809	CALR|18_REPAVYFK_3	30.48	40.48	337.188	337.186	337.187	3491	3	27	2006.86	92889.4	33.1662	39.1305	CALR|18	REPAVYFK	3	NA	NA	3	8	REPAVYFK	1	2080	2087	0.576975	0.58882	0.400815	-0.35769	0.511381	0.532973	0.357851	-0.134647	33.4476	35.48	-2.03241	10	3	MG132
329.53	27.6908	MTHFD2|36_REAVVISGR_3	22.69	32.69	329.531	329.529	329.53	1953	3	27	1606.07	2.58528e+06	25.7232	31.6991	MTHFD2|36	REAVVISGR	3	NA	NA	10	9	REAVVISGR	1	7997	8005	0.550791	0.564065	0.381527	-0.218292	0.543374	0.557813	0.376719	-0.137463	26.7678	27.69	-0.922156	10	3	MG132
758.338	44.9663	FBLN1|30_DVLLEACCADGHR_2	39.97	49.97	758.339	758.337	758.338	5792	2	27	2615.08	869461	43.5847	49.5519	FBLN1|30	DVLLEACCADGHR	2	7;8	Carbamidomethyl@C;Carbamidomethyl@C	53	13	DVLLEACCADGHR	1	68395	68407	0.49399	0.500123	0.333424	-0.442738	0.534268	0.538785	0.362233	-0.442738	43.5847	44.97	-1.38526	10	3	MG132
702.834	41.5014	CPSF7|33_DVLTATSQPSDDR_2	36.5	46.5	702.835	702.833	702.834	5428	2	27	2521.68	907101	39.8813	45.8502	CPSF7|33	DVLTATSQPSDDR	2	NA	NA	46	13	DVLTATSQPSDDR	1	57643	57655	0.487203	0.497561	0.331542	-0.0147091	0.488806	0.498812	0.33246	-0.197948	42.028	41.5	0.528042	10	3	MG132
776.86	67.1829	PDIA3|26_DVLELTDDNFESR_2	62.18	72.18	776.861	776.859	776.86	10831	2	27	3970.06	894985	65.45	71.4372	PDIA3|26	DVLELTDDNFESR	2	NA	NA	52	13	DVLELTDDNFESR	1	66043	66055	0.477893	0.489548	0.325676	-0.0811985	0.516666	0.523393	0.350668	-0.20305	66.1677	67.18	-1.01229	10	3	MG132
443.882	22.4798	TNFRSF12A|28_REQAPGTAPCSR_3	17.48	27.48	443.884	443.882	443.883	1208	3	27	1396.02	174092	20.73	26.7232	TNFRSF12A|28	REQAPGTAPCSR	3	10	Carbamidomethyl@C	33	12	REQAPGTAPCSR	1	37081	37092	0.447592	0.466449	0.308934	-0.320719	0.473567	0.489701	0.325788	-0.320719	23.267	22.48	0.78696	10	3	MG132
448.569	33.1905	FKBP11|26_REAGLETESPVR_3	28.19	38.19	448.57	448.568	448.569	3149	3	27	1914.62	879540	31.177	37.1533	FKBP11|26	REAGLETESPVR	3	NA	NA	39	12	REAGLETESPVR	1	44286	44297	0.422282	0.440893	0.290676	-0.326779	0.414267	0.434347	0.286042	-0.320719	31.9103	33.19	-1.27975	10	3	MG132
605.827	72.7819	BCL2|130_FATVVEELFR_2	67.78	77.78	605.828	605.826	605.827	11868	2	27	4254.51	5535579	70.7556	76.7425	BCL2|130	FATVVEELFR	2	NA	NA	16	10	FATVVEELFR	1	14683	14692	0.371617	0.402204	0.263512	-0.281853	0.330131	0.365673	0.238323	-0.22278	70.9085	72.78	-1.8715	10	3	MG132
557.299	44.2714	PLA2R1|21_EGVAAALTPER_2	39.27	49.27	557.3	557.298	557.299	6146	2	27	2706.71	338691	42.3613	48.3383	PLA2R1|21	EGVAAALTPER	2	NA	NA	23	11	EGVAAALTPER	1	24944	24954	0.369899	0.396941	0.259856	-0.156004	0.386608	0.411647	0.270093	-0.217073	45.1118	44.27	0.841824	10	3	MG132
557.928	36.8535	FBLN1|30_RDVLLEACCADGHR_3	31.85	41.85	557.929	557.927	557.928	4125	3	27	2176.2	485292	35.0165	40.9925	FBLN1|30	RDVLLEACCADGHR	3	8;9	Carbamidomethyl@C;Carbamidomethyl@C	64	14	RDVLLEACCADGHR	1	91812	91825	0.340898	0.361777	0.23566	-0.516136	0.373044	0.390944	0.255702	-0.507428	36.2701	36.85	-0.579938	10	3	MG132
681.355	58.8019	LSM3|7_REQQTTNTVEEPLDLIR_3	53.8	63.8	681.356	681.354	681.355	9645	3	27	3632.76	6.54305e+06	57.2288	63.2044	LSM3|7	REQQTTNTVEEPLDLIR	3	NA	NA	78	17	REQQTTNTVEEPLDLIR	2	133217	133233	0.333906	0.371657	0.24242	-0.48647	0.333114	0.370529	0.241647	-0.44984	60.5461	58.8	1.74608	10	3	MG132
496.295	48.7357	ERN1|280_LTPTLYVGK_2	43.74	53.74	496.296	496.294	496.295	7853	2	27	3155.53	447741	46.9573	52.9155	ERN1|280	LTPTLYVGK	2	NA	NA	14	9	LTPTLYVGK	2	13325	13333	0.279485	0.350096	0.227702	-0.0976906	0.500318	0.541819	0.364528	-0.00513196	52.5921	48.74	3.85215	10	3	MG132
467.733	29.7107	CENPU|49_NSDVSSIGR_2	24.71	34.71	467.734	467.732	467.733	3135	2	27	1910.9	148918	27.8432	33.8027	CENPU|49	NSDVSSIGR	2	NA	NA	11	9	NSDVSSIGR	1	10061	10069	0.24592	0.296247	0.19147	-0.229655	0.249691	0.299739	0.193799	-0.314333	31.8484	29.71	2.13838	10	3	MG132
364.519	25.9378	CENPU|49_RDSDVSSIGR_3	20.94	30.94	364.521	364.519	364.519	2025	3	27	1624.66	826518	23.9715	29.9616	CENPU|49	RDSDVSSIGR	3	NA	NA	19	10	RDSDVSSIGR	1	19831	19840	0.2163	0.259267	0.166962	-0.22278	0.211862	0.254933	0.164107	-0.213771	27.0777	25.94	1.13766	10	3	MG132
559.957	43.3358	P4HB|18_RDAPEEEDHVLVLR_3	38.34	48.34	559.958	559.956	559.957	6031	3	27	2676.6	916848	41.4217	47.3543	P4HB|18	RDAPEEEDHVLVLR	3	NA	NA	55	14	RDAPEEEDHVLVLR	2	73326	73339	0.214997	0.275724	0.177835	-0.465935	0.0627414	0.137948	0.0881014	-0.429779	44.61	43.34	1.27001	10	3	MG132
584.304	60.3621	P4HA3|29_DTFSALTSVAR_2	55.36	65.36	584.305	584.303	584.304	9416	2	27	3572.23	1.8897e+06	58.6181	64.5862	P4HA3|29	DTFSALTSVAR	2	NA	NA	27	11	DTFSALTSVAR	1	27684	27694	0.183759	0.232032	0.149075	-0.163321	0.16262	0.212867	0.13656	-0.231707	59.5371	60.36	-0.822854	10	3	MG132
630.957	51.6242	HSP90B1|22_RDDEVDVDGTVEEDLGK_3	46.62	56.62	630.958	630.956	630.957	8486	3	27	3323.02	817303	50.0591	56.0352	HSP90B1|22	RDDEVDVDGTVEEDLGK	3	NA	NA	77	17	RDDEVDVDGTVEEDLGK	1	131185	131201	0.1332	0.167806	0.107337	-0.107326	0.129298	0.166047	0.1062	-0.202129	55.3837	51.62	3.76367	10	3	MG132
520.925	34.7462	CPSF7|33_RDVLTATSQPSDDR_3	29.75	39.75	520.926	520.924	520.925	4140	3	27	2180.4	1.00194e+06	32.654	38.601	CPSF7|33	RDVLTATSQPSDDR	3	NA	NA	61	14	RDVLTATSQPSDDR	1	84597	84610	0.128744	0.169961	0.108728	-0.361436	0.122854	0.163468	0.104536	-0.314949	36.3401	34.75	1.59007	10	3	MG132
542.269	42.9302	CASP3|29_SGISLDNSYK_2	37.93	47.93	542.27	542.269	542.269	5287	2	27	2487.17	353854	41.3323	47.2881	CASP3|29	SGISLDNSYK	2	NA	NA	15	10	SGISLDNSYK	1	13432	13441	0.113802	0.167208	0.10695	-0.166667	0.102605	0.157242	0.100521	-0.175676	41.4529	42.93	-1.4771	10	3	MG132
576.587	27.2043	IGFBP4|22_RDEAIHCPPCSEEK_3	22.2	32.2	576.588	576.586	576.587	2516	3	27	1750.46	225237	25.2627	31.2281	IGFBP4|22	RDEAIHCPPCSEEK	3	7;10	Carbamidomethyl@C;Carbamidomethyl@C	62	14	RDEAIHCPPCSEEK	1	86989	87002	0.00408855	0.0568157	0.0361896	-0.0683855	0.0421201	0.0916337	0.0584178	-0.291727	29.1744	27.2	1.97437	10	3	MG132
786.327	31.4927	IGFBP4|22_DEAIHCPPCSEEK_2	26.49	36.49	786.328	786.326	786.327	2651	2	27	1783.83	193651	29.7305	35.6846	IGFBP4|22	DEAIHCPPCSEEK	2	6;9	Carbamidomethyl@C;Carbamidomethyl@C	54	13	DEAIHCPPCSEEK	0	70315	70327	0	0	0	0.0935193	0	0	0	-0.317846	29.7305	31.49	-1.75948	10	3	MG132
806.875	19.0125	SHMT2|27_QHSNAAQTQTGEANR_2	14.01	24.01	806.876	806.874	806.875	136	2	27	1050.54	20021.9	17.509	23.4958	SHMT2|27	QHSNAAQTQTGEANR	2	NA	NA	67	15	QHSNAAQTQTGEANR	0	98750	98764	0	0	0	0.434211	0	0	0	-0.346719	17.509	19.01	-1.501	10	3	MG132
590.614	17.8991	SHMT2|27_REHSNAAQTQTGEANR_3	12.9	22.9	590.615	590.613	590.614	1	3	27	993.49	16673.5	16.5582	22.5412	SHMT2|27	REHSNAAQTQTGEANR	3	NA	NA	73	16	REHSNAAQTQTGEANR	0	115508	115523	0	0	0	-0.0196999	0	0	0	-0.500528	16.5582	17.9	-1.34183	10	3	MG132
867.881	58.2026	HSP90B1|22_DDEVDVDGTVEEDLGK_2	53.2	63.2	867.882	867.88	867.881	8696	2	27	3380.57	142580	56.3428	62.3272	HSP90B1|22	DDEVDVDGTVEEDLGK	2	NA	NA	74	16	DDEVDVDGTVEEDLGK	0	123608	123623	0	0	0	0.467324	0	0	0	-0.288941	56.3428	58.2	-1.85724	10	3	MG132
607.616	43.539	TMEM59|36_REAFDSVLGDTASCHR_3	38.54	48.54	607.617	607.615	607.616	5275	3	27	2483.68	2.92329e+06	41.3946	47.3621	TMEM59|36	REAFDSVLGDTASCHR	3	14	Carbamidomethyl@C	75	16	REAFDSVLGDTASCHR	0	126443	126458	0	0	0	-0.536538	0	0	0	-0.500528	41.3946	43.54	-2.14538	10	3	MG132
848.393	68.08	UQCRHL|15_RDPEEEEEEEEELVDPLTTVR_3	63.08	73.08	848.394	848.392	848.393	10913	3	27	3993.91	719344	66.5651	72.5301	UQCRHL|15	RDPEEEEEEEEELVDPLTTVR	3	NA	NA	84	21	RDPEEEEEEEEELVDPLTTVR	0	141502	141522	0	0	0	0.238514	0	0	0	-0.429372	66.5651	68.08	-1.51487	10	3	MG132
836.415	69.2789	SQSTM1|421_NYDIGAALDTIQYSK_2	64.28	74.28	836.416	836.414	836.415	11616	2	27	4185.63	6748602	67.4509	73.4188	SQSTM1|421	NYDIGAALDTIQYSK	2	NA	NA	71	15	NYDIGAALDTIQYSK	17	113939	113953	0.988212	0.989904	0.909462	0.773582	0.984447	0.986675	0.895956	0.762235	69.7605	69.28	0.480507	11	3	MGTG
745.392	59.9233	PRTC11_SFANQPLEVVYSK_2	54.92	64.92	745.393	745.391	745.392	9333	2	27	3546.47	31503456	58.0197	63.9863	PRTC11	SFANQPLEVVYSK	2	13	Label:13C(6)15N(2)@K	45	13	SFANQPLEVVYSk	16	55095	55107	0.987059	0.98901	0.905532	0.859857	0.965632	0.970854	0.845921	0.727475	59.1078	59.92	-0.81223	11	3	MGTG
773.895	53.205	PRTC08_ELGQSGVDTYLQTK_2	48.21	58.21	773.896	773.894	773.895	7892	2	27	3159.76	8124843	51.2479	57.2208	PRTC08	ELGQSGVDTYLQTK	2	14	Label:13C(6)15N(2)@K	56	14	ELGQSGVDTYLQTk	14	74844	74857	0.98594	0.988194	0.902078	0.742423	0.907676	0.923268	0.748985	0.788739	52.6626	53.21	-0.547408	11	3	MGTG
787.421	72.8278	PRTC15_LSSEAPALFQFDLK_2	67.83	77.83	787.422	787.42	787.421	12370	2	27	4384.95	4.95811e+06	70.8593	76.8384	PRTC15	LSSEAPALFQFDLK	2	14	Label:13C(6)15N(2)@K	63	14	LSSEAPALFQFDLk	17	88819	88832	0.977036	0.979435	0.870667	0.548322	0.947852	0.953332	0.804741	0.457569	73.0825	72.83	0.252473	11	3	MGTG
415.74	33.151	MTHFD2|36_EAVVISGR_2	28.15	38.15	415.741	415.739	415.74	3170	2	27	1915.58	445273	31.3148	37.2543	MTHFD2|36	EAVVISGR	2	NA	NA	4	8	EAVVISGR	6	3353	3360	0.951852	0.95754	0.81382	0.621784	0.954795	0.960067	0.819483	0.621784	31.9263	33.15	-1.22373	11	3	MGTG
682.849	48.3756	SSBP1|17_ESETTTSLVLER_2	43.38	53.38	682.85	682.848	682.849	6714	2	27	2844.3	1.23812e+06	46.6957	52.6891	SSBP1|17	ESETTTSLVLER	2	NA	NA	34	12	ESETTTSLVLER	11	39221	39232	0.951685	0.959465	0.818118	0.819662	0.94506	0.954253	0.806694	0.819662	47.405	48.38	-0.975039	11	3	MGTG
761.381	51.6026	P4HB|18_DAPEEEDHVLVLR_2	46.6	56.6	761.382	761.38	761.381	7373	2	27	3021.62	1.01551e+06	49.7877	55.7504	P4HB|18	DAPEEEDHVLVLR	2	NA	NA	51	13	DAPEEEDHVLVLR	18	63603	63615	0.950335	0.954422	0.807054	0.497775	0.888164	0.905906	0.721617	0.50749	50.3604	51.6	-1.23959	11	3	MGTG
451.283	34.9206	PRTC04_DIPVPKPK_2	29.92	39.92	451.284	451.282	451.283	3876	2	27	2102.49	1.55131e+06	33.4224	39.4127	PRTC04	DIPVPKPK	2	8	Label:13C(6)15N(2)@K	2	8	DIPVPKPk	9	1141	1148	0.948531	0.955458	0.809276	0.741653	0.945489	0.952786	0.803594	0.761357	35.0415	34.92	0.121517	11	3	MGTG
680.374	71.767	PRTC14_ELASGLSFPVGFK_2	66.77	76.77	680.375	680.372	680.373	12087	2	27	4310.15	1251234	69.9375	75.9112	PRTC14	ELASGLSFPVGFK	2	13	Label:13C(6)15N(2)@K	48	13	ELASGLSFPVGFk	12	59475	59487	0.935351	0.945782	0.789404	0.717054	0.830255	0.856618	0.654877	0.777084	71.8358	71.77	0.065751	11	3	MGTG
628.299	27.7828	ERO1A|24_EEQPPETAAQR_2	22.78	32.78	628.3	628.298	628.299	2173	2	27	1663.03	510905	25.7665	31.7421	ERO1A|24	EEQPPETAAQR	2	NA	NA	22	11	EEQPPETAAQR	2	23288	23298	0.92944	0.928515	0.757828	0.0749531	0.815073	0.822179	0.614484	-0.0744841	27.7172	27.78	-0.062819	11	3	MGTG
801.411	60.0386	PRTC10_GILFVGSGVSGGEEGAR_2	55.04	65.04	801.412	801.41	801.411	9393	2	27	3561.86	2.31196e+06	58.4153	64.3784	PRTC10	GILFVGSGVSGGEEGAR	2	17	Label:13C(6)15N(4)@R	79	17	GILFVGSGVSGGEEGAr	14	135180	135196	0.922601	0.930156	0.760657	0.680059	0.601264	0.642565	0.44426	0.434432	59.3643	60.04	-0.675726	11	3	MGTG
498.802	63.8572	PRTC12_LTILEELR_2	58.86	68.86	498.803	498.801	498.802	10547	2	27	3879.17	114439	62.0235	67.9857	PRTC12	LTILEELR	2	8	Label:13C(6)15N(4)@R	7	8	LTILEELr	6	6412	6419	0.919487	0.933015	0.765664	0.557198	0.700292	0.746797	0.536819	0.13711	64.6528	63.86	0.792805	11	3	MGTG
764.835	69.703	ATF4|76_EDAFSGTDWMLEK_2	64.7	74.7	764.836	764.834	764.835	11602	2	27	4181.84	2.10542e+06	67.8346	73.794	ATF4|76	EDAFSGTDWMLEK	2	NA	NA	42	13	EDAFSGTDWMLEK	5	48759	48771	0.915089	0.918416	0.741062	0.335324	0.896856	0.901193	0.714615	0.344768	69.6973	69.7	-0.002656	11	3	MGTG
758.338	44.9663	FBLN1|30_DVLLEACCADGHR_2	39.97	49.97	758.339	758.337	758.338	5851	2	27	2622.45	855474	43.6017	49.5735	FBLN1|30	DVLLEACCADGHR	2	7;8	Carbamidomethyl@C;Carbamidomethyl@C	53	13	DVLLEACCADGHR	6	68523	68535	0.912585	0.919172	0.742282	0.0775619	0.913258	0.922048	0.74697	0.0778875	43.7074	44.97	-1.26255	11	3	MGTG
587.269	26.2323	TNFRSF12A|28_EQAPGTAPCSR_2	21.23	31.23	587.27	587.269	587.269	1719	2	27	1544.14	279397	24.3837	30.3633	TNFRSF12A|28	EQAPGTAPCSR	2	9	Carbamidomethyl@C	28	11	EQAPGTAPCSR	7	30188	30198	0.905392	0.916003	0.737206	0.636023	0.930927	0.938863	0.776238	0.555347	25.7356	26.23	-0.494378	11	3	MGTG
573.302	67.5684	PRTC13_NGFILDGFPR_2	62.57	72.57	573.303	573.301	573.302	11529	2	27	4161.83	45428.9	65.8373	71.8279	PRTC13	NGFILDGFPR	2	10	Label:13C(6)15N(4)@R	20	10	NGFILDGFPr	4	21968	21977	0.890964	0.902716	0.716859	0.635264	0.678454	0.700868	0.494407	0.62677	69.3638	67.57	1.79379	11	3	MGTG
496.287	29.929	PRTC03_HVLTSIGEK_2	24.93	34.93	496.288	496.286	496.287	2342	2	27	1705.61	695686	28.2066	34.1771	PRTC03	HVLTSIGEK	2	9	Label:13C(6)15N(2)@K	13	9	HVLTSIGEk	3	10650	10658	0.876633	0.886075	0.693157	0.357038	0.868685	0.880362	0.685401	0.0172287	28.4269	29.93	-1.50315	11	3	MGTG
760.356	53.4877	BAX|66_IGDELDSNMELQR_2	48.49	58.49	760.357	760.356	760.356	8073	2	27	3207.64	288719	51.6671	57.6321	BAX|66	IGDELDSNMELQR	2	NA	NA	44	13	IGDELDSNMELQR	5	52983	52995	0.866257	0.87067	0.672629	0.100304	0.855541	0.861115	0.660466	0.0958532	53.4606	53.49	-0.029401	11	3	MGTG
493.768	26.3416	PRTC01_SSAAPPPPPR_2	21.34	31.34	493.769	493.767	493.768	2540	2	27	1756.56	2805843	24.5402	30.5231	PRTC01	SSAAPPPPPR	2	10	Label:13C(6)15N(4)@R	18	10	SSAAPPPPPr	2	18494	18503	0.835054	0.832283	0.625933	-0.0559845	0.710228	0.72524	0.516543	0.279151	29.276	26.34	2.93599	11	3	MGTG
471.236	24.3151	ERO1A|24_REEQPPETAAQR_3	19.32	29.32	471.237	471.235	471.236	1438	3	27	1465.8	600163	22.5	28.485	ERO1A|24	REEQPPETAAQR	3	NA	NA	37	12	REEQPPETAAQR	1	42598	42609	0.828194	0.81346	0.604838	-0.314658	0.827076	0.814501	0.605978	-0.366032	24.43	24.32	0.109982	11	3	MGTG
761.368	41.0085	FLNA|1502_NADGTQTVNYVPSR_2	36.01	46.01	761.369	761.367	761.368	5117	2	27	2434.58	238244	39.4515	45.4017	FLNA|1502	NADGTQTVNYVPSR	2	NA	NA	60	14	NADGTQTVNYVPSR	1	81942	81955	0.804091	0.786857	0.576586	-0.248186	0.799862	0.783407	0.57304	-0.195893	40.5763	41.01	-0.43366	11	3	MGTG
558.326	56.6711	PRTC09_GLILVGGYGTR_2	51.67	61.67	558.327	558.325	558.326	9556	2	27	3605.35	302900	55.0488	61.015	PRTC09	GLILVGGYGTR	2	11	Label:13C(6)15N(4)@R	29	11	GLILVGGYGTr	4	33198	33208	0.794228	0.814845	0.606357	0.755441	0.759324	0.780545	0.570117	0.460694	60.0891	56.67	3.41911	11	3	MGTG
695.832	45.6162	PRTC06_TASEFDSAIAQDK_2	40.62	50.62	695.833	695.831	695.832	6062	2	27	2677.47	13949661	43.6452	49.6245	PRTC06	TASEFDSAIAQDK	2	13	Label:13C(6)15N(2)@K	43	13	TASEFDSAIAQDk	14	50679	50691	0.787668	0.829499	0.622748	0.605569	0.863324	0.886839	0.694207	0.450174	44.6244	45.62	-0.995577	11	3	MGTG
507.602	41.2944	SSBP1|17_RESETTTSLVLER_3	36.29	46.29	507.603	507.601	507.602	6108	3	27	2689.05	226794	39.5019	45.4799	SSBP1|17	RESETTTSLVLER	3	NA	NA	49	13	RESETTTSLVLER	2	63195	63207	0.782767	0.777136	0.566657	-0.239687	0.756914	0.755897	0.545598	-0.190838	44.8175	41.29	3.52749	11	3	MGTG
570.276	58.136	PDIA3|26_RDVLELTDDNFESR_3	53.14	63.14	570.277	570.275	570.276	9222	3	27	3518.53	598657	56.3705	62.3229	PDIA3|26	RDVLELTDDNFESR	3	NA	NA	65	14	RDVLELTDDNFESR	1	94812	94825	0.775623	0.755985	0.545684	-0.248186	0.777842	0.757788	0.54744	-0.344019	58.6422	58.14	0.502163	11	3	MGTG
427.226	43.2527	CALR|18_EPAVYFK_2	38.25	48.25	427.227	427.225	427.226	5352	2	27	2496.46	1.11872e+06	41.6076	47.6034	CALR|18	EPAVYFK	2	NA	NA	1	7	EPAVYFK	6	0	6	0.771299	0.808958	0.599936	0.626957	0.781014	0.816349	0.608011	0.646957	41.6076	43.25	-1.64238	11	3	MGTG
422.736	38.5693	PRTC05_IGDYAGIK_2	33.57	43.57	422.737	422.735	422.736	4570	2	27	2288.47	1.25915e+06	36.9165	42.8511	PRTC05	IGDYAGIK	2	8	Label:13C(6)15N(2)@K	6	8	IGDYAGIk	7	4683	4690	0.744584	0.77784	0.56737	0.547619	0.188788	0.317145	0.205448	0.532841	38.1412	38.57	-0.428809	11	3	MGTG
613.317	30.6463	PRTC02_GISNEGQNASIK_2	25.65	35.65	613.318	613.316	613.317	2858	2	27	1833.56	3118096	28.8742	34.8276	PRTC02	GISNEGQNASIK	2	12	Label:13C(6)15N(2)@K	40	12	GISNEGQNASIk	12	46536	46547	0.742389	0.786641	0.576363	0.689218	0.549724	0.607837	0.415925	0.298168	30.5593	30.65	-0.090714	11	3	MGTG
818.891	39.83	ENG|26_ETVHCDLQPVGPER_2	34.83	44.83	818.892	818.89	818.891	4745	2	27	2334.14	60632.1	38.149	44.0988	ENG|26	ETVHCDLQPVGPER	2	5	Carbamidomethyl@C	58	14	ETVHCDLQPVGPER	2	79719	79732	0.729825	0.730599	0.521518	-0.241569	0.821096	0.809851	0.600904	-0.2373	38.9023	39.83	-0.927721	11	3	MGTG
586.8	46.4127	PRTC07_SAAGAFGPELSR_2	41.41	51.41	586.801	586.799	586.8	6393	2	27	2762.3	1.30721e+06	44.5282	50.4756	PRTC07	SAAGAFGPELSR	2	12	Label:13C(6)15N(4)@R	32	12	SAAGAFGPELSr	10	33853	33864	0.69177	0.736528	0.527072	0.542847	0.347993	0.432612	0.284816	0.31198	46.0383	46.41	-0.371662	11	3	MGTG
752.854	54.3255	HSP90B1|24_EVDVDGTVEEDLGK_2	49.33	59.33	752.855	752.853	752.854	9146	2	27	3498.4	992822	52.5462	58.5046	HSP90B1|24	EVDVDGTVEEDLGK	2	NA	NA	57	14	EVDVDGTVEEDLGK	1	79355	79368	0.673968	0.665295	0.463389	-0.0204901	0.634671	0.623679	0.428725	-0.14057	58.3066	54.33	3.97659	11	3	MGTG
554.272	47.8065	HSP90B1|24_REVDVDGTVEEDLGK_3	42.81	52.81	554.273	554.271	554.272	7420	3	27	3034.07	977085	45.9375	51.8811	HSP90B1|24	REVDVDGTVEEDLGK	3	NA	NA	68	15	REVDVDGTVEEDLGK	2	107457	107471	0.654743	0.654743	0.454446	0.00126451	0.633511	0.633824	0.437031	-0.154751	50.5678	47.81	2.75784	11	3	MGTG
594.299	39.5989	FKBP11|26_EAGLETESPVR_2	34.6	44.6	594.3	594.298	594.299	4985	2	27	2399.29	89272.2	37.8739	43.7949	FKBP11|26	EAGLETESPVR	2	NA	NA	26	11	EAGLETESPVR	2	26558	26568	0.641837	0.658572	0.457679	0.0605065	0.658919	0.674217	0.471037	0.0605065	39.9882	39.6	0.388154	11	3	MGTG
776.86	67.1829	PDIA3|26_DVLELTDDNFESR_2	62.18	72.18	776.861	776.859	776.86	11696	2	27	4206.47	589645	65.4506	71.4449	PDIA3|26	DVLELTDDNFESR	2	NA	NA	52	13	DVLELTDDNFESR	2	67995	68007	0.577488	0.595034	0.405723	0.0285497	0.587408	0.603102	0.412137	-0.0933022	70.1078	67.18	2.92776	11	3	MGTG
337.187	35.4809	CALR|18_REPAVYFK_3	30.48	40.48	337.188	337.186	337.187	3498	3	27	2003.11	69605.5	33.1881	39.1375	CALR|18	REPAVYFK	3	NA	NA	3	8	REPAVYFK	1	2079	2086	0.576975	0.58882	0.400815	-0.35769	0.511381	0.532973	0.357851	-0.134647	33.3852	35.48	-2.09479	11	3	MGTG
329.53	27.6908	MTHFD2|36_REAVVISGR_3	22.69	32.69	329.531	329.529	329.53	1981	3	27	1614.06	194821	25.7239	31.6994	MTHFD2|36	REAVVISGR	3	NA	NA	10	9	REAVVISGR	1	8042	8050	0.550791	0.564065	0.381527	-0.218292	0.543374	0.557813	0.376719	-0.137463	26.9011	27.69	-0.788946	11	3	MGTG
607.616	43.539	TMEM59|36_REAFDSVLGDTASCHR_3	38.54	48.54	607.617	607.615	607.616	5583	3	27	2553.3	2.02366e+06	41.3933	47.343	TMEM59|36	REAFDSVLGDTASCHR	3	14	Carbamidomethyl@C	75	16	REAFDSVLGDTASCHR	1	127003	127018	0.539677	0.538925	0.362339	-0.439817	0.532765	0.534776	0.359208	-0.403807	42.555	43.54	-0.984989	11	3	MGTG
867.881	58.2026	HSP90B1|22_DDEVDVDGTVEEDLGK_2	53.2	63.2	867.882	867.88	867.881	9711	2	27	3646.74	429060	56.3474	62.3268	HSP90B1|22	DDEVDVDGTVEEDLGK	2	NA	NA	74	16	DDEVDVDGTVEEDLGK	1	125878	125893	0.496189	0.508617	0.339686	0.560767	0.373005	0.390517	0.255408	-0.195499	60.779	58.2	2.57904	11	3	MGTG
702.834	41.5014	CPSF7|33_DVLTATSQPSDDR_2	36.5	46.5	702.835	702.833	702.834	5474	2	27	2525.93	1.69844e+06	39.8831	45.8558	CPSF7|33	DVLTATSQPSDDR	2	NA	NA	46	13	DVLTATSQPSDDR	1	57759	57771	0.487203	0.497561	0.331542	-0.0147091	0.488806	0.498812	0.33246	-0.197948	42.0989	41.5	0.598855	11	3	MGTG
467.733	29.7107	CENPU|49_NSDVSSIGR_2	24.71	34.71	467.734	467.732	467.733	3297	2	27	1949.35	97628.7	27.831	33.8197	CENPU|49	NSDVSSIGR	2	NA	NA	11	9	NSDVSSIGR	1	10306	10314	0.481867	0.502422	0.335116	-0.218292	0.446961	0.471708	0.312724	-0.291606	32.4891	29.71	2.77909	11	3	MGTG
448.569	33.1905	FKBP11|26_REAGLETESPVR_3	28.19	38.19	448.57	448.568	448.569	3191	3	27	1920.86	3733378	31.1728	37.1186	FKBP11|26	REAGLETESPVR	3	NA	NA	39	12	REAGLETESPVR	1	44413	44424	0.422282	0.440893	0.290676	-0.326779	0.414267	0.434347	0.286042	-0.320719	32.0144	33.19	-1.17563	11	3	MGTG
605.827	72.7819	BCL2|130_FATVVEELFR_2	67.78	77.78	605.828	605.826	605.827	11932	2	27	4269.21	4.42985e+06	70.7676	76.7417	BCL2|130	FATVVEELFR	2	NA	NA	16	10	FATVVEELFR	1	14822	14831	0.371617	0.402204	0.263512	-0.281853	0.330131	0.365673	0.238323	-0.22278	71.1535	72.78	-1.6265	11	3	MGTG
557.928	36.8535	FBLN1|30_RDVLLEACCADGHR_3	31.85	41.85	557.929	557.927	557.928	4153	3	27	2176.53	440100	34.9939	40.9655	FBLN1|30	RDVLLEACCADGHR	3	8;9	Carbamidomethyl@C;Carbamidomethyl@C	64	14	RDVLLEACCADGHR	1	91991	92004	0.340898	0.361777	0.23566	-0.516136	0.373044	0.390944	0.255702	-0.507428	36.2755	36.85	-0.574499	11	3	MGTG
496.295	48.7357	ERN1|280_LTPTLYVGK_2	43.74	53.74	496.296	496.294	496.295	7789	2	27	3132.51	162140	46.9368	52.8963	ERN1|280	LTPTLYVGK	2	NA	NA	14	9	LTPTLYVGK	2	13330	13338	0.281545	0.347796	0.22614	-0.0976906	0.513828	0.54869	0.369747	-0.00513196	52.2085	48.74	3.46846	11	3	MGTG
520.925	34.7462	CPSF7|33_RDVLTATSQPSDDR_3	29.75	39.75	520.926	520.924	520.925	3451	3	27	1990.46	144049	32.6453	38.6266	CPSF7|33	RDVLTATSQPSDDR	3	NA	NA	61	14	RDVLTATSQPSDDR	1	83619	83632	0.257801	0.288584	0.186369	-0.348374	0.289306	0.317235	0.205509	-0.301887	33.1743	34.75	-1.57571	11	3	MGTG
364.519	25.9378	CENPU|49_RDSDVSSIGR_3	20.94	30.94	364.521	364.519	364.519	2394	3	27	1719.18	721198	23.9737	29.9588	CENPU|49	RDSDVSSIGR	3	NA	NA	19	10	RDSDVSSIGR	2	20348	20357	0.196233	0.262554	0.16913	-0.109524	0.184604	0.251527	0.161866	-0.118533	28.6529	25.94	2.71292	11	3	MGTG
560.276	37.7312	FLNA|1502_RDADGTQTVNYVPSR_3	32.73	42.73	560.277	560.275	560.276	5095	3	27	2428.85	435797	35.9952	41.9509	FLNA|1502	RDADGTQTVNYVPSR	3	NA	NA	70	15	RDADGTQTVNYVPSR	1	112203	112217	0.192487	0.22898	0.147078	-0.3838	0.189727	0.225742	0.144961	-0.297642	40.4809	37.73	2.75089	11	3	MGTG
584.304	60.3621	P4HA3|29_DTFSALTSVAR_2	55.36	65.36	584.305	584.303	584.304	9427	2	27	3571.06	329133	58.5955	64.5844	P4HA3|29	DTFSALTSVAR	2	NA	NA	27	11	DTFSALTSVAR	1	27788	27798	0.183759	0.232032	0.149075	-0.163321	0.16262	0.212867	0.13656	-0.231707	59.5177	60.36	-0.842347	11	3	MGTG
794.019	50.9195	EIF4B|46_RDLEGDVSTTWHSNDDDVYR_3	45.92	55.92	794.02	794.018	794.019	7716	3	27	3113.28	529258	48.8384	54.7922	EIF4B|46	RDLEGDVSTTWHSNDDDVYR	3	NA	NA	83	20	RDLEGDVSTTWHSNDDDVYR	1	139861	139880	0.159018	0.190459	0.121995	-0.158852	0.173723	0.203632	0.130549	-0.27203	51.888	50.92	0.967975	11	3	MGTG
443.882	22.4798	TNFRSF12A|28_REQAPGTAPCSR_3	17.48	27.48	443.884	443.882	443.883	1324	3	27	1431.29	504283	20.7324	26.6995	TNFRSF12A|28	REQAPGTAPCSR	3	10	Carbamidomethyl@C	33	12	REQAPGTAPCSR	1	37703	37714	0.149599	0.194427	0.12457	-0.33284	0.181997	0.224736	0.144304	-0.326779	23.8548	22.48	1.37478	11	3	MGTG
557.299	44.2714	PLA2R1|21_EGVAAALTPER_2	39.27	49.27	557.3	557.298	557.299	5882	2	27	2630.49	940240	42.3917	48.3315	PLA2R1|21	EGVAAALTPER	2	NA	NA	23	11	EGVAAALTPER	1	24778	24788	0.13946	0.195275	0.12512	-0.185272	0.12115	0.179054	0.114607	-0.260976	43.8415	44.27	-0.428453	11	3	MGTG
598.297	34.4875	ENG|26_RETVHCDLQPVGPER_3	29.49	39.49	598.298	598.296	598.297	3461	3	27	1993.15	175380	32.6801	38.6344	ENG|26	RETVHCDLQPVGPER	3	6	Carbamidomethyl@C	69	15	RETVHCDLQPVGPER	1	108241	108255	0.124971	0.163459	0.10453	-0.3838	0.0922308	0.134543	0.0859133	-0.438346	33.2192	34.49	-1.27076	11	3	MGTG
542.269	42.9302	CASP3|29_SGISLDNSYK_2	37.93	47.93	542.27	542.269	542.269	5462	2	27	2522.99	394868	41.3288	47.2666	CASP3|29	SGISLDNSYK	2	NA	NA	15	10	SGISLDNSYK	1	13643	13652	0.113802	0.167208	0.10695	-0.166667	0.102605	0.157242	0.100521	-0.175676	42.0498	42.93	-0.880195	11	3	MGTG
630.957	51.6242	HSP90B1|22_RDDEVDVDGTVEEDLGK_3	46.62	56.62	630.958	630.956	630.957	7361	3	27	3018.37	1.94034e+06	50.0511	56.0401	HSP90B1|22	RDDEVDVDGTVEEDLGK	3	NA	NA	77	17	RDDEVDVDGTVEEDLGK	2	128796	128812	0.102095	0.156306	0.0999169	-0.0478939	0.127526	0.18289	0.11709	-0.139904	50.3062	51.62	-1.3138	11	3	MGTG
832.87	52.702	TMEM59|36_EAFDSVLGDTASCHR_2	47.7	57.7	832.871	832.869	832.87	7595	2	27	3081.4	701588	50.8737	56.8447	TMEM59|36	EAFDSVLGDTASCHR	2	13	Carbamidomethyl@C	66	15	EAFDSVLGDTASCHR	1	96439	96453	0.0603492	0.103684	0.0661262	-0.398838	0.101115	0.140629	0.0898249	-0.305161	51.3567	52.7	-1.34334	11	3	MGTG
681.355	58.8019	LSM3|7_REQQTTNTVEEPLDLIR_3	53.8	63.8	681.356	681.354	681.355	9384	3	27	3559.52	313516	57.2055	63.1811	LSM3|7	REQQTTNTVEEPLDLIR	3	NA	NA	78	17	REQQTTNTVEEPLDLIR	1	132812	132828	0.0534922	0.0992866	0.0633122	-0.421589	0.0583611	0.10242	0.0653172	-0.384959	59.3254	58.8	0.525415	11	3	MGTG
559.957	43.3358	P4HB|18_RDAPEEEDHVLVLR_3	38.34	48.34	559.958	559.956	559.957	6405	3	27	2765.41	300555	41.4204	47.3779	P4HB|18	RDAPEEEDHVLVLR	3	NA	NA	55	14	RDAPEEEDHVLVLR	1	73921	73934	0.00649971	0.069614	0.0443536	-0.555323	-0.0410417	0.0227475	0.0144828	-0.541193	46.0902	43.34	2.7502	11	3	MGTG
576.587	27.2043	IGFBP4|22_RDEAIHCPPCSEEK_3	22.2	32.2	576.588	576.586	576.587	2190	3	27	1667.41	1.23769e+06	25.2613	31.2178	IGFBP4|22	RDEAIHCPPCSEEK	3	7;10	Carbamidomethyl@C;Carbamidomethyl@C	62	14	RDEAIHCPPCSEEK	1	86635	86648	0.00408855	0.0568157	0.0361896	-0.0683855	0.0421201	0.0916337	0.0584178	-0.291727	27.7902	27.2	0.590206	11	3	MGTG
786.327	31.4927	IGFBP4|22_DEAIHCPPCSEEK_2	26.49	36.49	786.328	786.326	786.327	2653	2	27	1783.9	209808	29.7317	35.6983	IGFBP4|22	DEAIHCPPCSEEK	2	6;9	Carbamidomethyl@C;Carbamidomethyl@C	54	13	DEAIHCPPCSEEK	0	70419	70431	0	0	0	0.0935193	0	0	0	-0.317846	29.7317	31.49	-1.75829	11	3	MGTG
806.875	19.0125	SHMT2|27_QHSNAAQTQTGEANR_2	14.01	24.01	806.876	806.874	806.875	136	2	27	1050.43	13441.8	17.5072	23.4998	SHMT2|27	QHSNAAQTQTGEANR	2	NA	NA	67	15	QHSNAAQTQTGEANR	0	98889	98903	0	0	0	0.434211	0	0	0	-0.346719	17.5072	19.01	-1.50283	11	3	MGTG
590.614	17.8991	SHMT2|27_REHSNAAQTQTGEANR_3	12.9	22.9	590.615	590.613	590.614	1	3	27	993.409	15922.1	16.5568	22.551	SHMT2|27	REHSNAAQTQTGEANR	3	NA	NA	73	16	REHSNAAQTQTGEANR	0	115633	115648	0	0	0	-0.0196999	0	0	0	-0.500528	16.5568	17.9	-1.34318	11	3	MGTG
848.393	68.08	UQCRHL|15_RDPEEEEEEEEELVDPLTTVR_3	63.08	73.08	848.394	848.392	848.393	10923	3	27	3994.29	344362	66.5715	72.5369	UQCRHL|15	RDPEEEEEEEEELVDPLTTVR	3	NA	NA	84	21	RDPEEEEEEEEELVDPLTTVR	0	141571	141591	0	0	0	0.238514	0	0	0	-0.429372	66.5715	68.08	-1.50846	11	3	MGTG
836.415	69.2789	SQSTM1|421_NYDIGAALDTIQYSK_2	64.28	74.28	836.416	836.414	836.415	11525	2	27	4190.4	17387652	67.458	73.4412	SQSTM1|421	NYDIGAALDTIQYSK	2	NA	NA	71	15	NYDIGAALDTIQYSK	18	112893	112907	0.988347	0.990063	0.910177	0.825461	0.984139	0.986471	0.895164	0.814115	69.84	69.28	0.559978	12	3	MGTG
745.392	59.9233	PRTC11_SFANQPLEVVYSK_2	54.92	64.92	745.393	745.391	745.392	9218	2	27	3544.91	34797756	58.0281	63.9907	PRTC11	SFANQPLEVVYSK	2	13	Label:13C(6)15N(2)@K	45	13	SFANQPLEVVYSk	16	54350	54362	0.987255	0.989101	0.905922	0.859965	0.959296	0.965375	0.831984	0.731274	59.0819	59.92	-0.838113	12	3	MGTG
773.895	53.205	PRTC08_ELGQSGVDTYLQTK_2	48.21	58.21	773.896	773.894	773.895	7817	2	27	3168.44	6424498	51.2655	57.2245	PRTC08	ELGQSGVDTYLQTK	2	14	Label:13C(6)15N(2)@K	56	14	ELGQSGVDTYLQTk	15	74005	74018	0.985875	0.988293	0.902492	0.809741	0.912462	0.927917	0.756804	0.733544	52.8073	53.21	-0.40268	12	3	MGTG
787.421	72.8278	PRTC15_LSSEAPALFQFDLK_2	67.83	77.83	787.422	787.42	787.421	12266	2	27	4386.36	10418582	70.8638	76.8415	PRTC15	LSSEAPALFQFDLK	2	14	Label:13C(6)15N(2)@K	63	14	LSSEAPALFQFDLk	10	87798	87811	0.969266	0.969655	0.842767	0.392	0.921026	0.922634	0.747936	0.297661	73.1061	72.83	0.276061	12	3	MGTG
451.283	34.9206	PRTC04_DIPVPKPK_2	29.92	39.92	451.284	451.282	451.283	4235	2	27	2222.84	192053	33.4451	39.4022	PRTC04	DIPVPKPK	2	8	Label:13C(6)15N(2)@K	2	8	DIPVPKPk	7	1514	1521	0.952245	0.958282	0.815464	0.742474	0.951009	0.957424	0.813563	0.753968	37.0474	34.92	2.12736	12	3	MGTG
682.849	48.3756	SSBP1|17_ESETTTSLVLER_2	43.38	53.38	682.85	682.848	682.849	6587	2	27	2840.62	1.09678e+06	46.7069	52.6622	SSBP1|17	ESETTTSLVLER	2	NA	NA	34	12	ESETTTSLVLER	11	38609	38620	0.949846	0.959433	0.818046	0.819662	0.943263	0.954195	0.80657	0.819662	47.3436	48.38	-1.03638	12	3	MGTG
761.381	51.6026	P4HB|18_DAPEEEDHVLVLR_2	46.6	56.6	761.382	761.38	761.381	7228	2	27	3013.12	1157333	49.784	55.7467	P4HB|18	DAPEEEDHVLVLR	2	NA	NA	51	13	DAPEEEDHVLVLR	19	62762	62774	0.945031	0.949855	0.79754	0.420213	0.888509	0.906123	0.721944	0.446103	50.2187	51.6	-1.38129	12	3	MGTG
680.374	71.767	PRTC14_ELASGLSFPVGFK_2	66.77	76.77	680.375	680.372	680.373	12169	2	27	4359.77	390823	69.9428	75.9104	PRTC14	ELASGLSFPVGFK	2	13	Label:13C(6)15N(2)@K	48	13	ELASGLSFPVGFk	10	59054	59066	0.933075	0.942568	0.783194	0.712766	0.835726	0.860291	0.659437	0.754451	72.6629	71.77	0.892861	12	3	MGTG
415.74	33.151	MTHFD2|36_EAVVISGR_2	28.15	38.15	415.741	415.739	415.74	3105	2	27	1917.82	46488.8	31.3095	37.2462	MTHFD2|36	EAVVISGR	2	NA	NA	4	8	EAVVISGR	4	3320	3327	0.931136	0.9366	0.772091	0.393815	0.935501	0.940398	0.779095	0.393815	31.9637	33.15	-1.18627	12	3	MGTG
801.411	60.0386	PRTC10_GILFVGSGVSGGEEGAR_2	55.04	65.04	801.412	801.41	801.411	9542	2	27	3630.43	563787	58.4206	64.3892	PRTC10	GILFVGSGVSGGEEGAR	2	17	Label:13C(6)15N(4)@R	79	17	GILFVGSGVSGGEEGAr	11	134574	134590	0.924468	0.93155	0.763086	0.61598	0.622979	0.661471	0.460135	0.484501	60.5071	60.04	0.467087	12	3	MGTG
498.802	63.8572	PRTC12_LTILEELR_2	58.86	68.86	498.803	498.801	498.802	9983	2	27	3748.82	186619	62.0277	67.9934	PRTC12	LTILEELR	2	8	Label:13C(6)15N(4)@R	7	8	LTILEELr	7	5637	5644	0.907446	0.919379	0.742617	0.653257	0.482023	0.558335	0.377119	0.265462	62.4804	63.86	-1.37962	12	3	MGTG
573.302	67.5684	PRTC13_NGFILDGFPR_2	62.57	72.57	573.303	573.301	573.302	10906	2	27	4020.12	331208	65.8471	71.8277	PRTC13	NGFILDGFPR	2	10	Label:13C(6)15N(4)@R	20	10	NGFILDGFPr	5	20757	20766	0.899035	0.912115	0.731103	0.751223	0.620882	0.648613	0.449301	0.502831	67.0021	67.57	-0.567946	12	3	MGTG
764.835	69.703	ATF4|76_EDAFSGTDWMLEK_2	64.7	74.7	764.836	764.834	764.835	11475	2	27	4177.34	1.81228e+06	67.8421	73.7962	ATF4|76	EDAFSGTDWMLEK	2	NA	NA	42	13	EDAFSGTDWMLEK	3	47990	48002	0.853645	0.854052	0.651724	0.148665	0.823956	0.826064	0.61885	0.14378	69.6223	69.7	-0.077728	12	3	MGTG
496.287	29.929	PRTC03_HVLTSIGEK_2	24.93	34.93	496.288	496.286	496.287	2546	2	27	1768.56	106135	28.2211	34.1703	PRTC03	HVLTSIGEK	2	9	Label:13C(6)15N(2)@K	13	9	HVLTSIGEk	2	10647	10655	0.830917	0.839164	0.633911	0.213526	0.802257	0.815781	0.607385	-0.126283	29.476	29.93	-0.454022	12	3	MGTG
471.236	24.3151	ERO1A|24_REEQPPETAAQR_3	19.32	29.32	471.237	471.235	471.236	1391	3	27	1453.38	154364	22.5038	28.477	ERO1A|24	REEQPPETAAQR	3	NA	NA	37	12	REEQPPETAAQR	1	41843	41854	0.828194	0.81346	0.604838	-0.314658	0.827076	0.814501	0.605978	-0.366032	24.2231	24.32	-0.096945	12	3	MGTG
761.368	41.0085	FLNA|1502_NADGTQTVNYVPSR_2	36.01	46.01	761.369	761.367	761.368	5027	2	27	2436.84	205948	39.4411	45.4086	FLNA|1502	NADGTQTVNYVPSR	2	NA	NA	60	14	NADGTQTVNYVPSR	1	81051	81064	0.804091	0.786857	0.576586	-0.248186	0.799862	0.783407	0.57304	-0.195893	40.614	41.01	-0.39602	12	3	MGTG
558.326	56.6711	PRTC09_GLILVGGYGTR_2	51.67	61.67	558.327	558.325	558.326	9401	2	27	3593	1.04673e+06	55.0492	61.0255	PRTC09	GLILVGGYGTR	2	11	Label:13C(6)15N(4)@R	29	11	GLILVGGYGTr	4	32559	32569	0.796736	0.816352	0.608014	0.755253	0.773248	0.792858	0.582815	0.460319	59.8833	56.67	3.21334	12	3	MGTG
695.832	45.6162	PRTC06_TASEFDSAIAQDK_2	40.62	50.62	695.833	695.831	695.832	6021	2	27	2694.62	1.41117e+06	43.642	49.6175	PRTC06	TASEFDSAIAQDK	2	13	Label:13C(6)15N(2)@K	43	13	TASEFDSAIAQDk	12	50018	50030	0.788407	0.828109	0.621166	0.735454	0.879466	0.899739	0.712486	0.57919	44.9103	45.62	-0.709743	12	3	MGTG
493.768	26.3416	PRTC01_SSAAPPPPPR_2	21.34	31.34	493.769	493.767	493.768	2395	2	27	1727.93	68154.9	24.5367	30.509	PRTC01	SSAAPPPPPR	2	10	Label:13C(6)15N(4)@R	18	10	SSAAPPPPPr	6	18057	18066	0.776966	0.812562	0.603856	0.451351	0.697778	0.744496	0.53462	0.530631	28.7988	26.34	2.45884	12	3	MGTG
427.226	43.2527	CALR|18_EPAVYFK_2	38.25	48.25	427.227	427.225	427.226	5309	2	27	2511.17	352053	41.623	47.5846	CALR|18	EPAVYFK	2	NA	NA	1	7	EPAVYFK	5	30	36	0.773898	0.807096	0.597924	0.767826	0.78555	0.816646	0.608338	0.787826	41.8528	43.25	-1.39723	12	3	MGTG
628.299	27.7828	ERO1A|24_EEQPPETAAQR_2	22.78	32.78	628.3	628.298	628.299	2181	2	27	1669.59	75116	25.8006	31.7496	ERO1A|24	EEQPPETAAQR	2	NA	NA	22	11	EEQPPETAAQR	1	22879	22889	0.771394	0.770736	0.560223	-0.0605066	0.3369	0.367062	0.239273	-0.217073	27.8266	27.78	0.046561	12	3	MGTG
587.269	26.2323	TNFRSF12A|28_EQAPGTAPCSR_2	21.23	31.23	587.27	587.269	587.269	1689	2	27	1536.99	46925.1	24.3839	30.3716	TNFRSF12A|28	EQAPGTAPCSR	2	9	Carbamidomethyl@C	28	11	EQAPGTAPCSR	2	29629	29639	0.770794	0.773183	0.562673	0.0678236	0.86677	0.862467	0.662163	0.00140709	25.6164	26.23	-0.61358	12	3	MGTG
613.317	30.6463	PRTC02_GISNEGQNASIK_2	25.65	35.65	613.318	613.316	613.317	2793	2	27	1832.69	7560498	28.8494	34.8328	PRTC02	GISNEGQNASIK	2	12	Label:13C(6)15N(2)@K	40	12	GISNEGQNASIk	14	45836	45847	0.745557	0.787769	0.577528	0.559056	0.556156	0.612506	0.419677	0.163213	30.5448	30.65	-0.105232	12	3	MGTG
422.736	38.5693	PRTC05_IGDYAGIK_2	33.57	43.57	422.737	422.735	422.736	4430	2	27	2275.82	2.50156e+06	36.8947	42.8799	PRTC05	IGDYAGIK	2	8	Label:13C(6)15N(2)@K	6	8	IGDYAGIk	8	4580	4587	0.744407	0.779584	0.569139	0.6341	0.185502	0.317641	0.205781	0.411877	37.9304	38.57	-0.639648	12	3	MGTG
818.891	39.83	ENG|26_ETVHCDLQPVGPER_2	34.83	44.83	818.892	818.89	818.891	4667	2	27	2338.6	41690.9	38.1473	44.1055	ENG|26	ETVHCDLQPVGPER	2	5	Carbamidomethyl@C	58	14	ETVHCDLQPVGPER	2	78867	78880	0.734578	0.734539	0.525203	-0.241569	0.826516	0.814367	0.605832	-0.2373	38.9767	39.83	-0.853279	12	3	MGTG
760.356	53.4877	BAX|66_IGDELDSNMELQR_2	48.49	58.49	760.357	760.356	760.356	7944	2	27	3201.9	285331	51.6463	57.6355	BAX|66	IGDELDSNMELQR	2	NA	NA	44	13	IGDELDSNMELQR	4	52214	52226	0.698333	0.723397	0.51484	-0.210432	0.697132	0.722174	0.513714	-0.210432	53.365	53.49	-0.124996	12	3	MGTG
586.8	46.4127	PRTC07_SAAGAFGPELSR_2	41.41	51.41	586.801	586.799	586.8	6478	2	27	2812.56	1.49651e+06	44.531	50.4876	PRTC07	SAAGAFGPELSR	2	12	Label:13C(6)15N(4)@R	32	12	SAAGAFGPELSr	10	33505	33516	0.6983	0.741053	0.531347	0.566103	0.352206	0.434972	0.286484	0.487456	46.8759	46.41	0.465945	12	3	MGTG
758.338	44.9663	FBLN1|30_DVLLEACCADGHR_2	39.97	49.97	758.339	758.337	758.338	5755	2	27	2625.57	787371	43.6032	49.5649	FBLN1|30	DVLLEACCADGHR	2	7;8	Carbamidomethyl@C;Carbamidomethyl@C	53	13	DVLLEACCADGHR	3	67742	67754	0.685382	0.700135	0.493754	-0.242727	0.715735	0.729339	0.520345	-0.227855	43.7595	44.97	-1.21055	12	3	MGTG
752.854	54.3255	HSP90B1|24_EVDVDGTVEEDLGK_2	49.33	59.33	752.855	752.853	752.854	8807	2	27	3435.33	2.31422e+06	52.5259	58.5098	HSP90B1|24	EVDVDGTVEEDLGK	2	NA	NA	57	14	EVDVDGTVEEDLGK	2	77983	77996	0.67987	0.685663	0.480975	0.069154	0.635032	0.641309	0.443217	-0.0594639	57.2555	54.33	2.92553	12	3	MGTG
554.272	47.8065	HSP90B1|24_REVDVDGTVEEDLGK_3	42.81	52.81	554.273	554.271	554.272	7310	3	27	3034.82	1.35376e+06	45.9164	51.8943	HSP90B1|24	REVDVDGTVEEDLGK	3	NA	NA	68	15	REVDVDGTVEEDLGK	2	106425	106439	0.653667	0.653234	0.453176	0.00126451	0.632058	0.631953	0.435493	-0.154751	50.5803	47.81	2.77034	12	3	MGTG
507.602	41.2944	SSBP1|17_RESETTTSLVLER_3	36.29	46.29	507.603	507.601	507.602	6012	3	27	2692.29	484405	39.4914	45.4423	SSBP1|17	RESETTTSLVLER	3	NA	NA	49	13	RESETTTSLVLER	1	62426	62438	0.644106	0.635765	0.43863	-0.354538	0.61643	0.612613	0.419763	-0.305688	44.8714	41.29	3.58142	12	3	MGTG
832.87	52.702	TMEM59|36_EAFDSVLGDTASCHR_2	47.7	57.7	832.871	832.869	832.87	8339	2	27	3307.85	156733	50.8563	56.8489	TMEM59|36	EAFDSVLGDTASCHR	2	13	Carbamidomethyl@C	66	15	EAFDSVLGDTASCHR	1	97003	97017	0.626902	0.627941	0.432204	-0.380041	0.618022	0.620522	0.426158	-0.293882	55.1309	52.7	2.43088	12	3	MGTG
594.299	39.5989	FKBP11|26_EAGLETESPVR_2	34.6	44.6	594.3	594.298	594.299	5457	2	27	2548.33	260809	37.8658	43.8449	FKBP11|26	EAGLETESPVR	2	NA	NA	26	11	EAGLETESPVR	1	26689	26699	0.598722	0.60338	0.41236	-0.0605066	0.601302	0.60634	0.414726	-0.0605066	42.4722	39.6	2.87225	12	3	MGTG
337.187	35.4809	CALR|18_REPAVYFK_3	30.48	40.48	337.188	337.186	337.187	3492	3	27	2022.7	26236.8	33.1591	39.1489	CALR|18	REPAVYFK	3	NA	NA	3	8	REPAVYFK	1	2102	2109	0.576975	0.58882	0.400815	-0.35769	0.511381	0.532973	0.357851	-0.134647	33.7117	35.48	-1.76828	12	3	MGTG
329.53	27.6908	MTHFD2|36_REAVVISGR_3	22.69	32.69	329.531	329.529	329.53	1933	3	27	1603.05	176561	25.7219	31.7069	MTHFD2|36	REAVVISGR	3	NA	NA	10	9	REAVVISGR	1	7919	7927	0.550791	0.564065	0.381527	-0.218292	0.543374	0.557813	0.376719	-0.137463	26.7174	27.69	-0.972577	12	3	MGTG
607.616	43.539	TMEM59|36_REAFDSVLGDTASCHR_3	38.54	48.54	607.617	607.615	607.616	5452	3	27	2546.95	4866379	41.397	47.3632	TMEM59|36	REAFDSVLGDTASCHR	3	14	Carbamidomethyl@C	75	16	REAFDSVLGDTASCHR	1	125839	125854	0.539677	0.538925	0.362339	-0.439817	0.532765	0.534776	0.359208	-0.403807	42.4492	43.54	-1.09083	12	3	MGTG
776.86	67.1829	PDIA3|26_DVLELTDDNFESR_2	62.18	72.18	776.861	776.859	776.86	10664	2	27	3949.95	1813461	65.4457	71.4119	PDIA3|26	DVLELTDDNFESR	2	NA	NA	52	13	DVLELTDDNFESR	2	65162	65174	0.501346	0.530817	0.35623	0.0186713	0.510638	0.538748	0.362205	-0.103181	65.8325	67.18	-1.34753	12	3	MGTG
867.881	58.2026	HSP90B1|22_DDEVDVDGTVEEDLGK_2	53.2	63.2	867.882	867.88	867.881	9604	2	27	3646.96	660805	56.3458	62.3243	HSP90B1|22	DDEVDVDGTVEEDLGK	2	NA	NA	74	16	DDEVDVDGTVEEDLGK	1	124759	124774	0.496189	0.508617	0.339686	0.560767	0.373005	0.390517	0.255408	-0.195499	60.7826	58.2	2.5826	12	3	MGTG
467.733	29.7107	CENPU|49_NSDVSSIGR_2	24.71	34.71	467.734	467.732	467.733	3273	2	27	1963.68	73593.1	27.8544	33.8049	CENPU|49	NSDVSSIGR	2	NA	NA	11	9	NSDVSSIGR	1	10167	10175	0.481867	0.502422	0.335116	-0.218292	0.446961	0.471708	0.312724	-0.291606	32.728	29.71	3.01801	12	3	MGTG
448.569	33.1905	FKBP11|26_REAGLETESPVR_3	28.19	38.19	448.57	448.568	448.569	3138	3	27	1926.82	221044	31.1558	37.1452	FKBP11|26	REAGLETESPVR	3	NA	NA	39	12	REAGLETESPVR	1	43801	43812	0.422282	0.440893	0.290676	-0.326779	0.414267	0.434347	0.286042	-0.320719	32.1136	33.19	-1.07641	12	3	MGTG
605.827	72.7819	BCL2|130_FATVVEELFR_2	67.78	77.78	605.828	605.826	605.827	11760	2	27	4253.14	1.41698e+06	70.7743	76.7427	BCL2|130	FATVVEELFR	2	NA	NA	16	10	FATVVEELFR	1	14475	14484	0.371617	0.402204	0.263512	-0.281853	0.330131	0.365673	0.238323	-0.22278	70.8857	72.78	-1.89433	12	3	MGTG
557.299	44.2714	PLA2R1|21_EGVAAALTPER_2	39.27	49.27	557.3	557.298	557.299	6107	2	27	2717.16	162389	42.3783	48.3401	PLA2R1|21	EGVAAALTPER	2	NA	NA	23	11	EGVAAALTPER	1	24579	24589	0.369899	0.396941	0.259856	-0.156004	0.386608	0.411647	0.270093	-0.217073	45.286	44.27	1.01603	12	3	MGTG
557.928	36.8535	FBLN1|30_RDVLLEACCADGHR_3	31.85	41.85	557.929	557.927	557.928	4084	3	27	2182.05	467809	35.0056	40.9632	FBLN1|30	RDVLLEACCADGHR	3	8;9	Carbamidomethyl@C;Carbamidomethyl@C	64	14	RDVLLEACCADGHR	1	90983	90996	0.340898	0.361777	0.23566	-0.516136	0.373044	0.390944	0.255702	-0.507428	36.3675	36.85	-0.482503	12	3	MGTG
681.355	58.8019	LSM3|7_REQQTTNTVEEPLDLIR_3	53.8	63.8	681.356	681.354	681.355	9589	3	27	3642.91	2.30278e+06	57.2092	63.2042	LSM3|7	REQQTTNTVEEPLDLIR	3	NA	NA	78	17	REQQTTNTVEEPLDLIR	2	132302	132318	0.337078	0.374556	0.244409	-0.48647	0.336259	0.373419	0.243629	-0.44984	60.7152	58.8	1.91524	12	3	MGTG
496.295	48.7357	ERN1|280_LTPTLYVGK_2	43.74	53.74	496.296	496.294	496.295	6853	2	27	2911.92	335072	46.952	52.9008	ERN1|280	LTPTLYVGK	2	NA	NA	14	9	LTPTLYVGK	2	12095	12103	0.281667	0.348633	0.226708	-0.0976906	0.512616	0.548463	0.369574	-0.00513196	48.532	48.74	-0.208011	12	3	MGTG
630.957	51.6242	HSP90B1|22_RDDEVDVDGTVEEDLGK_3	46.62	56.62	630.958	630.956	630.957	7202	3	27	3005.79	1.54887e+06	50.0656	56.0384	HSP90B1|22	RDDEVDVDGTVEEDLGK	3	NA	NA	77	17	RDDEVDVDGTVEEDLGK	2	127550	127566	0.261792	0.303493	0.196306	-0.0277015	0.285807	0.327254	0.212246	-0.116827	50.0965	51.62	-1.52346	12	3	MGTG
794.019	50.9195	EIF4B|46_RDLEGDVSTTWHSNDDDVYR_3	45.92	55.92	794.02	794.018	794.019	7656	3	27	3126.47	529096	48.8276	54.7924	EIF4B|46	RDLEGDVSTTWHSNDDDVYR	3	NA	NA	83	20	RDLEGDVSTTWHSNDDDVYR	1	138876	138895	0.238875	0.263318	0.169634	-0.154751	0.26558	0.287671	0.185762	-0.267929	52.1078	50.92	1.18784	12	3	MGTG
560.276	37.7312	FLNA|1502_RDADGTQTVNYVPSR_3	32.73	42.73	560.277	560.275	560.276	4997	3	27	2428.78	193665	35.973	41.9303	FLNA|1502	RDADGTQTVNYVPSR	3	NA	NA	70	15	RDADGTQTVNYVPSR	1	111129	111143	0.192487	0.22898	0.147078	-0.3838	0.189727	0.225742	0.144961	-0.297642	40.4796	37.73	2.7496	12	3	MGTG
542.269	42.9302	CASP3|29_SGISLDNSYK_2	37.93	47.93	542.27	542.269	542.269	6283	2	27	2763.03	335217	41.33	47.2892	CASP3|29	SGISLDNSYK	2	NA	NA	15	10	SGISLDNSYK	2	14169	14178	0.189238	0.256741	0.165297	-0.0178893	0.185274	0.253467	0.163142	-0.0268984	46.0505	42.93	3.12048	12	3	MGTG
584.304	60.3621	P4HA3|29_DTFSALTSVAR_2	55.36	65.36	584.305	584.303	584.304	9312	2	27	3569.56	593121	58.6044	64.5923	P4HA3|29	DTFSALTSVAR	2	NA	NA	27	11	DTFSALTSVAR	1	27259	27269	0.183759	0.232032	0.149075	-0.163321	0.16262	0.212867	0.13656	-0.231707	59.4926	60.36	-0.867375	12	3	MGTG
364.519	25.9378	CENPU|49_RDSDVSSIGR_3	20.94	30.94	364.521	364.519	364.519	2252	3	27	1689.03	64421	23.9731	29.9281	CENPU|49	RDSDVSSIGR	3	NA	NA	19	10	RDSDVSSIGR	1	19848	19857	0.181153	0.226982	0.145772	-0.231789	0.171062	0.217408	0.139521	-0.231789	28.1505	25.94	2.21046	12	3	MGTG
570.276	58.136	PDIA3|26_RDVLELTDDNFESR_3	53.14	63.14	570.277	570.275	570.276	8917	3	27	3465.73	424894	56.3706	62.3204	PDIA3|26	RDVLELTDDNFESR	3	NA	NA	65	14	RDVLELTDDNFESR	1	93375	93388	0.15587	0.19813	0.126974	-0.269956	0.175039	0.215438	0.138236	-0.361436	57.7621	58.14	-0.37787	12	3	MGTG
443.882	22.4798	TNFRSF12A|28_REQAPGTAPCSR_3	17.48	27.48	443.884	443.882	443.883	1672	3	27	1532.06	49338	20.7316	26.702	TNFRSF12A|28	REQAPGTAPCSR	3	10	Carbamidomethyl@C	33	12	REQAPGTAPCSR	1	38070	38081	0.149599	0.194427	0.12457	-0.33284	0.181997	0.224736	0.144304	-0.326779	25.5343	22.48	3.05434	12	3	MGTG
598.297	34.4875	ENG|26_RETVHCDLQPVGPER_3	29.49	39.49	598.298	598.296	598.297	4141	3	27	2197.21	121176	32.6817	38.6335	ENG|26	RETVHCDLQPVGPER	3	6	Carbamidomethyl@C	69	15	RETVHCDLQPVGPER	1	108497	108511	0.124971	0.163459	0.10453	-0.3838	0.0922308	0.134543	0.0859133	-0.438346	36.6202	34.49	2.13015	12	3	MGTG
576.587	27.2043	IGFBP4|22_RDEAIHCPPCSEEK_3	22.2	32.2	576.588	576.586	576.587	1732	3	27	1548.97	171856	25.2595	31.2374	IGFBP4|22	RDEAIHCPPCSEEK	3	7;10	Carbamidomethyl@C;Carbamidomethyl@C	62	14	RDEAIHCPPCSEEK	1	84899	84912	0.105036	0.149176	0.095324	-0.0466149	0.00916899	0.061488	0.0391693	-0.296081	25.8162	27.2	-1.38384	12	3	MGTG
520.925	34.7462	CPSF7|33_RDVLTATSQPSDDR_3	29.75	39.75	520.926	520.924	520.925	3946	3	27	2144.57	223246	32.6468	38.6257	CPSF7|33	RDVLTATSQPSDDR	3	NA	NA	61	14	RDVLTATSQPSDDR	1	83586	83599	0.0771282	0.122517	0.0781935	-0.370144	0.0854448	0.12891	0.0822959	-0.319303	35.7429	34.75	0.992914	12	3	MGTG
702.834	41.5014	CPSF7|33_DVLTATSQPSDDR_2	36.5	46.5	702.835	702.833	702.834	6055	2	27	2703.59	599000	39.8802	45.8356	CPSF7|33	DVLTATSQPSDDR	2	NA	NA	46	13	DVLTATSQPSDDR	1	57794	57806	0.0684206	0.12287	0.0784196	-0.0504234	0.0548874	0.111019	0.0708226	-0.238765	45.0598	41.5	3.55984	12	3	MGTG
786.327	31.4927	IGFBP4|22_DEAIHCPPCSEEK_2	26.49	36.49	786.328	786.326	786.327	2606	2	27	1783.87	174190	29.7312	35.708	IGFBP4|22	DEAIHCPPCSEEK	2	6;9	Carbamidomethyl@C;Carbamidomethyl@C	54	13	DEAIHCPPCSEEK	0	69614	69626	0	0	0	0.0935193	0	0	0	-0.317846	29.7312	31.49	-1.75879	12	3	MGTG
559.957	43.3358	P4HB|18_RDAPEEEDHVLVLR_3	38.34	48.34	559.958	559.956	559.957	5209	3	27	2485.45	158296	41.4242	47.3554	P4HB|18	RDAPEEEDHVLVLR	3	NA	NA	55	14	RDAPEEEDHVLVLR	0	71678	71691	0	0	0	-0.614104	0	0	0	-0.578204	41.4242	43.34	-1.91582	12	3	MGTG
806.875	19.0125	SHMT2|27_QHSNAAQTQTGEANR_2	14.01	24.01	806.876	806.874	806.875	133	2	27	1050.3	24733.6	17.505	23.495	SHMT2|27	QHSNAAQTQTGEANR	2	NA	NA	67	15	QHSNAAQTQTGEANR	0	97843	97857	0	0	0	0.434211	0	0	0	-0.346719	17.505	19.01	-1.50502	12	3	MGTG
590.614	17.8991	SHMT2|27_REHSNAAQTQTGEANR_3	12.9	22.9	590.615	590.613	590.614	1	3	27	993.514	12500.7	16.5586	22.555	SHMT2|27	REHSNAAQTQTGEANR	3	NA	NA	73	16	REHSNAAQTQTGEANR	0	114559	114574	0	0	0	-0.0196999	0	0	0	-0.500528	16.5586	17.9	-1.34144	12	3	MGTG
848.393	68.08	UQCRHL|15_RDPEEEEEEEEELVDPLTTVR_3	63.08	73.08	848.394	848.392	848.393	10814	3	27	3993.94	448066	66.5657	72.5342	UQCRHL|15	RDPEEEEEEEEELVDPLTTVR	3	NA	NA	84	21	RDPEEEEEEEEELVDPLTTVR	0	140472	140492	0	0	0	0.238514	0	0	0	-0.429372	66.5657	68.08	-1.51427	12	3	MGTG
836.415	69.2789	SQSTM1|421_NYDIGAALDTIQYSK_2	64.28	74.28	836.416	836.414	836.415	11554	2	27	4196.43	8251517	67.4521	73.4189	SQSTM1|421	NYDIGAALDTIQYSK	2	NA	NA	71	15	NYDIGAALDTIQYSK	16	113055	113069	0.987724	0.989321	0.906878	0.813739	0.982968	0.985218	0.890404	0.8054	69.9405	69.28	0.66052	13	6	MOCK
745.392	59.9233	PRTC11_SFANQPLEVVYSK_2	54.92	64.92	745.393	745.391	745.392	9208	2	27	3550.71	36611724	57.9515	63.9385	PRTC11	SFANQPLEVVYSK	2	13	Label:13C(6)15N(2)@K	45	13	SFANQPLEVVYSk	15	53896	53908	0.9869	0.988794	0.904603	0.914785	0.962327	0.967943	0.838369	0.782838	59.1784	59.92	-0.741553	13	6	MOCK
773.895	53.205	PRTC08_ELGQSGVDTYLQTK_2	48.21	58.21	773.896	773.894	773.895	7744	2	27	3166.61	23628452	51.4219	57.3836	PRTC08	ELGQSGVDTYLQTK	2	14	Label:13C(6)15N(2)@K	56	14	ELGQSGVDTYLQTk	15	73803	73816	0.985328	0.987796	0.90044	0.810168	0.907245	0.923423	0.749241	0.852557	52.7768	53.21	-0.433236	13	6	MOCK
761.381	51.6026	P4HB|18_DAPEEEDHVLVLR_2	46.6	56.6	761.382	761.38	761.381	7184	2	27	3021.45	1.22454e+06	49.7055	55.6837	P4HB|18	DAPEEEDHVLVLR	2	NA	NA	51	13	DAPEEEDHVLVLR	20	62512	62524	0.962001	0.964364	0.829533	0.534195	0.891321	0.908776	0.725964	0.529147	50.3576	51.6	-1.24243	13	6	MOCK
451.283	34.9206	PRTC04_DIPVPKPK_2	29.92	39.92	451.284	451.282	451.283	4141	2	27	2239.89	81309.1	33.3884	39.3482	PRTC04	DIPVPKPK	2	8	Label:13C(6)15N(2)@K	2	8	DIPVPKPk	4	1616	1623	0.961802	0.96506	0.831217	0.392173	0.95572	0.96076	0.821068	0.391626	37.3316	34.92	2.41155	13	6	MOCK
787.421	72.8278	PRTC15_LSSEAPALFQFDLK_2	67.83	77.83	787.422	787.42	787.421	12290	2	27	4386.89	9762687	70.8743	76.8511	PRTC15	LSSEAPALFQFDLK	2	14	Label:13C(6)15N(2)@K	63	14	LSSEAPALFQFDLk	10	87713	87726	0.953661	0.954249	0.806686	0.353155	0.893793	0.89621	0.707381	0.26445	73.1149	72.83	0.284909	13	6	MOCK
682.849	48.3756	SSBP1|17_ESETTTSLVLER_2	43.38	53.38	682.85	682.848	682.849	6493	2	27	2839.98	1.24242e+06	46.6927	52.6643	SSBP1|17	ESETTTSLVLER	2	NA	NA	34	12	ESETTTSLVLER	10	38403	38414	0.952551	0.960729	0.820995	0.752361	0.944879	0.954653	0.807547	0.752361	47.333	48.38	-1.04696	13	6	MOCK
415.74	33.151	MTHFD2|36_EAVVISGR_2	28.15	38.15	415.741	415.739	415.74	2910	2	27	1915.51	329094	31.127	37.1176	MTHFD2|36	EAVVISGR	2	NA	NA	4	8	EAVVISGR	4	3408	3415	0.942283	0.944932	0.787746	0.393268	0.946023	0.948235	0.794266	0.393268	31.9252	33.15	-1.22484	13	6	MOCK
680.374	71.767	PRTC14_ELASGLSFPVGFK_2	66.77	76.77	680.375	680.372	680.373	11972	2	27	4304.73	1.52804e+06	69.6752	75.6731	PRTC14	ELASGLSFPVGFK	2	13	Label:13C(6)15N(2)@K	48	13	ELASGLSFPVGFk	13	58408	58420	0.931059	0.941806	0.781746	0.783435	0.823262	0.85038	0.647255	0.843682	71.7454	71.77	-0.024554	13	6	MOCK
801.411	60.0386	PRTC10_GILFVGSGVSGGEEGAR_2	55.04	65.04	801.412	801.41	801.411	9735	2	27	3688.82	1.59465e+06	58.3081	64.2768	PRTC10	GILFVGSGVSGGEEGAR	2	17	Label:13C(6)15N(4)@R	79	17	GILFVGSGVSGGEEGAr	12	134957	134973	0.927066	0.934752	0.768756	0.792125	0.634341	0.673521	0.470438	0.541552	61.4803	60.04	1.44034	13	6	MOCK
498.802	63.8572	PRTC12_LTILEELR_2	58.86	68.86	498.803	498.801	498.802	10467	2	27	3894.29	112552	61.9114	67.8542	PRTC12	LTILEELR	2	8	Label:13C(6)15N(4)@R	7	8	LTILEELr	6	6712	6719	0.910648	0.927143	0.755486	0.555556	0.590087	0.655176	0.454811	0.121784	64.9048	63.86	1.0448	13	6	MOCK
573.302	67.5684	PRTC13_NGFILDGFPR_2	62.57	72.57	573.303	573.301	573.302	11520	2	27	4188.21	140384	65.7162	71.6755	PRTC13	NGFILDGFPR	2	10	Label:13C(6)15N(4)@R	20	10	NGFILDGFPr	5	21873	21882	0.904207	0.917362	0.739372	0.750193	0.611334	0.640076	0.442194	0.486873	69.8035	67.57	2.23351	13	6	MOCK
760.356	53.4877	BAX|66_IGDELDSNMELQR_2	48.49	58.49	760.357	760.356	760.356	7902	2	27	3207.1	686763	51.6256	57.5758	BAX|66	IGDELDSNMELQR	2	NA	NA	44	13	IGDELDSNMELQR	7	51784	51796	0.878479	0.889732	0.698217	0.276541	0.865304	0.878386	0.682759	0.267749	53.4516	53.49	-0.038396	13	6	MOCK
496.287	29.929	PRTC03_HVLTSIGEK_2	24.93	34.93	496.288	496.286	496.287	3178	2	27	1987.54	243110	28.2505	34.1933	PRTC03	HVLTSIGEK	2	9	Label:13C(6)15N(2)@K	13	9	HVLTSIGEk	2	11574	11582	0.870207	0.87176	0.674042	0.213526	0.916156	0.918431	0.741086	-0.126283	33.1257	29.93	3.19569	13	6	MOCK
587.269	26.2323	TNFRSF12A|28_EQAPGTAPCSR_2	21.23	31.23	587.27	587.269	587.269	1509	2	27	1546.58	124068	24.5089	30.4962	TNFRSF12A|28	EQAPGTAPCSR	2	9	Carbamidomethyl@C	28	11	EQAPGTAPCSR	5	29861	29871	0.856569	0.864015	0.664116	0.392777	0.869356	0.877314	0.681334	0.297092	25.7764	26.23	-0.453619	13	6	MOCK
493.768	26.3416	PRTC01_SSAAPPPPPR_2	21.34	31.34	493.769	493.767	493.768	2215	2	27	1733.36	265882	24.8226	30.8047	PRTC01	SSAAPPPPPR	2	10	Label:13C(6)15N(4)@R	18	10	SSAAPPPPPr	5	18192	18201	0.840637	0.861572	0.661039	0.337838	0.690258	0.733432	0.524165	0.400129	28.8894	26.34	2.54938	13	6	MOCK
471.236	24.3151	ERO1A|24_REEQPPETAAQR_3	19.32	29.32	471.237	471.235	471.236	1241	3	27	1471	124989	22.9824	28.9411	ERO1A|24	REEQPPETAAQR	3	NA	NA	37	12	REEQPPETAAQR	1	41285	41296	0.828194	0.81346	0.604838	-0.314658	0.827076	0.814501	0.605978	-0.366032	24.5167	24.32	0.196691	13	6	MOCK
761.368	41.0085	FLNA|1502_NADGTQTVNYVPSR_2	36.01	46.01	761.369	761.367	761.368	4915	2	27	2442.94	302026	39.4953	45.4779	FLNA|1502	NADGTQTVNYVPSR	2	NA	NA	60	14	NADGTQTVNYVPSR	2	80940	80953	0.824344	0.818815	0.610738	-0.145736	0.813177	0.809035	0.60002	-0.0977119	40.7157	41.01	-0.294318	13	6	MOCK
558.326	56.6711	PRTC09_GLILVGGYGTR_2	51.67	61.67	558.327	558.325	558.326	9567	2	27	3643.96	875151	54.8306	60.8025	PRTC09	GLILVGGYGTR	2	11	Label:13C(6)15N(4)@R	29	11	GLILVGGYGTr	4	33071	33081	0.813496	0.831685	0.625246	0.755441	0.72474	0.748779	0.538719	0.460694	60.7326	56.67	4.0626	13	6	MOCK
867.881	58.2026	HSP90B1|22_DDEVDVDGTVEEDLGK_2	53.2	63.2	867.882	867.88	867.881	8642	2	27	3403.87	1.28791e+06	56.1212	62.099	HSP90B1|22	DDEVDVDGTVEEDLGK	2	NA	NA	74	16	DDEVDVDGTVEEDLGK	1	122597	122612	0.81172	0.812577	0.603872	0.564046	0.660557	0.651383	0.451622	-0.19222	56.7312	58.2	-1.46877	13	6	MOCK
695.832	45.6162	PRTC06_TASEFDSAIAQDK_2	40.62	50.62	695.833	695.831	695.832	5869	2	27	2683.15	15731623	43.5981	49.5704	PRTC06	TASEFDSAIAQDK	2	13	Label:13C(6)15N(2)@K	43	13	TASEFDSAIAQDk	12	49420	49432	0.790455	0.831349	0.624861	0.734694	0.86165	0.885372	0.692193	0.57919	44.7192	45.62	-0.900812	13	6	MOCK
584.304	60.3621	P4HA3|29_DTFSALTSVAR_2	55.36	65.36	584.305	584.303	584.304	9793	2	27	3703.98	1.62681e+06	58.3855	64.3613	P4HA3|29	DTFSALTSVAR	2	NA	NA	27	11	DTFSALTSVAR	5	28251	28261	0.789015	0.816476	0.608151	0.336867	0.778844	0.807894	0.598786	0.268856	61.7331	60.36	1.37307	13	6	MOCK
570.276	58.136	PDIA3|26_RDVLELTDDNFESR_3	53.14	63.14	570.277	570.275	570.276	9795	3	27	3704.36	1.38927e+06	56.2538	62.223	PDIA3|26	RDVLELTDDNFESR	3	NA	NA	65	14	RDVLELTDDNFESR	1	95123	95136	0.775623	0.755985	0.545684	-0.248186	0.777842	0.757788	0.54744	-0.344019	61.7393	58.14	3.5993	13	6	MOCK
628.299	27.7828	ERO1A|24_EEQPPETAAQR_2	22.78	32.78	628.3	628.298	628.299	1963	2	27	1666.3	275476	25.9701	31.9368	ERO1A|24	EEQPPETAAQR	2	NA	NA	22	11	EEQPPETAAQR	1	22961	22971	0.771394	0.770736	0.560223	-0.0605066	0.3369	0.367062	0.239273	-0.217073	27.7716	27.78	-0.008389	13	6	MOCK
427.226	43.2527	CALR|18_EPAVYFK_2	38.25	48.25	427.227	427.225	427.226	5155	2	27	2504.07	1.20057e+06	41.4223	47.3949	CALR|18	EPAVYFK	2	NA	NA	1	7	EPAVYFK	5	42	48	0.769341	0.807461	0.598318	0.767826	0.778476	0.814339	0.605801	0.787826	41.7345	43.25	-1.51551	13	6	MOCK
758.338	44.9663	FBLN1|30_DVLLEACCADGHR_2	39.97	49.97	758.339	758.337	758.338	5655	2	27	2628.46	1.24259e+06	43.11	49.0724	FBLN1|30	DVLLEACCADGHR	2	7;8	Carbamidomethyl@C;Carbamidomethyl@C	53	13	DVLLEACCADGHR	3	67720	67732	0.749743	0.758068	0.547713	-0.228072	0.768841	0.778002	0.567534	-0.22297	43.8076	44.97	-1.1624	13	6	MOCK
422.736	38.5693	PRTC05_IGDYAGIK_2	33.57	43.57	422.737	422.735	422.736	4343	2	27	2291.94	4.42551e+06	36.7818	42.7031	PRTC05	IGDYAGIK	2	8	Label:13C(6)15N(2)@K	6	8	IGDYAGIk	7	4745	4752	0.744455	0.776997	0.566516	0.547619	0.180058	0.308661	0.199762	0.532841	38.199	38.57	-0.371023	13	6	MOCK
613.317	30.6463	PRTC02_GISNEGQNASIK_2	25.65	35.65	613.318	613.316	613.317	2620	2	27	1838.19	2.37183e+06	29.0848	35.035	PRTC02	GISNEGQNASIK	2	12	Label:13C(6)15N(2)@K	40	12	GISNEGQNASIk	12	45190	45201	0.743738	0.786836	0.576565	0.554052	0.546329	0.604313	0.413105	0.294362	30.6365	30.65	-0.013534	13	6	MOCK
818.891	39.83	ENG|26_ETVHCDLQPVGPER_2	34.83	44.83	818.892	818.89	818.891	4497	2	27	2331.57	163009	38.0162	43.955	ENG|26	ETVHCDLQPVGPER	2	5	Carbamidomethyl@C	58	14	ETVHCDLQPVGPER	2	78691	78704	0.734772	0.73449	0.525157	-0.241569	0.826761	0.814368	0.605832	-0.2373	38.8594	39.83	-0.970575	13	6	MOCK
586.8	46.4127	PRTC07_SAAGAFGPELSR_2	41.41	51.41	586.801	586.799	586.8	6510	2	27	2844.4	890005	44.6251	50.5886	PRTC07	SAAGAFGPELSR	2	12	Label:13C(6)15N(4)@R	32	12	SAAGAFGPELSr	9	33849	33860	0.7071	0.744856	0.534963	0.493235	0.376039	0.451206	0.298012	0.425581	47.4067	46.41	0.996654	13	6	MOCK
752.854	54.3255	HSP90B1|24_EVDVDGTVEEDLGK_2	49.33	59.33	752.855	752.853	752.854	8736	2	27	3428.37	5.35949e+06	52.3808	58.3274	HSP90B1|24	EVDVDGTVEEDLGK	2	NA	NA	57	14	EVDVDGTVEEDLGK	2	77807	77820	0.667312	0.6767	0.473181	0.0817895	0.587807	0.602583	0.411723	-0.0426449	57.1396	54.33	2.80956	13	6	MOCK
554.272	47.8065	HSP90B1|24_REVDVDGTVEEDLGK_3	42.81	52.81	554.273	554.271	554.272	7259	3	27	3040.89	375026	45.8009	51.7554	HSP90B1|24	REVDVDGTVEEDLGK	3	NA	NA	68	15	REVDVDGTVEEDLGK	2	106433	106447	0.657002	0.660576	0.459376	0.00126451	0.63902	0.642771	0.444431	-0.154751	50.6815	47.81	2.87154	13	6	MOCK
507.602	41.2944	SSBP1|17_RESETTTSLVLER_3	36.29	46.29	507.603	507.601	507.602	5904	3	27	2691.8	280049	39.4062	45.3833	SSBP1|17	RESETTTSLVLER	3	NA	NA	49	13	RESETTTSLVLER	1	62104	62116	0.644106	0.635765	0.43863	-0.354538	0.61643	0.612613	0.419763	-0.305688	44.8633	41.29	3.57331	13	6	MOCK
594.299	39.5989	FKBP11|26_EAGLETESPVR_2	34.6	44.6	594.3	594.298	594.299	5339	2	27	2549.41	382401	37.7386	43.6987	FKBP11|26	EAGLETESPVR	2	NA	NA	26	11	EAGLETESPVR	1	26961	26971	0.598722	0.60338	0.41236	-0.0605066	0.601302	0.60634	0.414726	-0.0605066	42.4901	39.6	2.89009	13	6	MOCK
496.295	48.7357	ERN1|280_LTPTLYVGK_2	43.74	53.74	496.296	496.294	496.295	6600	2	27	2867.92	397551	47.0105	52.9709	ERN1|280	LTPTLYVGK	2	NA	NA	14	9	LTPTLYVGK	3	11966	11974	0.577409	0.623096	0.428251	-0.207845	0.570586	0.616855	0.423187	-0.126283	47.7986	48.74	-0.9414	13	6	MOCK
329.53	27.6908	MTHFD2|36_REAVVISGR_3	22.69	32.69	329.531	329.529	329.53	1804	3	27	1625.39	128910	25.6325	31.6086	MTHFD2|36	REAVVISGR	3	NA	NA	10	9	REAVVISGR	1	8182	8190	0.550791	0.564065	0.381527	-0.218292	0.543374	0.557813	0.376719	-0.137463	27.0898	27.69	-0.600198	13	6	MOCK
607.616	43.539	TMEM59|36_REAFDSVLGDTASCHR_3	38.54	48.54	607.617	607.615	607.616	5613	3	27	2617.53	424171	41.4614	47.4262	TMEM59|36	REAFDSVLGDTASCHR	3	14	Carbamidomethyl@C	75	16	REAFDSVLGDTASCHR	1	125897	125912	0.539677	0.538925	0.362339	-0.439817	0.532765	0.534776	0.359208	-0.403807	43.6255	43.54	0.085488	13	6	MOCK
776.86	67.1829	PDIA3|26_DVLELTDDNFESR_2	62.18	72.18	776.861	776.859	776.86	10635	2	27	3945.52	2.53956e+06	65.2767	71.2626	PDIA3|26	DVLELTDDNFESR	2	NA	NA	52	13	DVLELTDDNFESR	2	64936	64948	0.522902	0.546366	0.367979	0.0186713	0.544371	0.564887	0.382161	-0.103181	65.7586	67.18	-1.42137	13	6	MOCK
448.569	33.1905	FKBP11|26_REAGLETESPVR_3	28.19	38.19	448.57	448.568	448.569	3984	3	27	2198.41	362143	31.0007	36.9838	FKBP11|26	REAGLETESPVR	3	NA	NA	39	12	REAGLETESPVR	1	44651	44662	0.514834	0.522799	0.350224	-0.314658	0.524344	0.532346	0.357379	-0.314658	36.6402	33.19	3.45019	13	6	MOCK
764.835	69.703	ATF4|76_EDAFSGTDWMLEK_2	64.7	74.7	764.836	764.834	764.835	11623	2	27	4213.52	850888	67.7989	73.772	ATF4|76	EDAFSGTDWMLEK	2	NA	NA	42	13	EDAFSGTDWMLEK	2	47668	47680	0.447979	0.472412	0.313233	-0.00629616	0.458434	0.481194	0.319593	-0.00629616	70.2253	69.7	0.525322	13	6	MOCK
605.827	72.7819	BCL2|130_FATVVEELFR_2	67.78	77.78	605.828	605.826	605.827	11760	2	27	4249.19	1.40483e+06	70.7485	76.7137	BCL2|130	FATVVEELFR	2	NA	NA	16	10	FATVVEELFR	1	14637	14646	0.371617	0.402204	0.263512	-0.281853	0.330131	0.365673	0.238323	-0.22278	70.8198	72.78	-1.96023	13	6	MOCK
560.276	37.7312	FLNA|1502_RDADGTQTVNYVPSR_3	32.73	42.73	560.277	560.275	560.276	4650	3	27	2372.18	548867	36.0617	42.0273	FLNA|1502	RDADGTQTVNYVPSR	3	NA	NA	70	15	RDADGTQTVNYVPSR	1	110787	110801	0.370747	0.389769	0.25489	-0.380041	0.387691	0.405615	0.265886	-0.293882	39.5364	37.73	1.80635	13	6	MOCK
557.928	36.8535	FBLN1|30_RDVLLEACCADGHR_3	31.85	41.85	557.929	557.927	557.928	3914	3	27	2180.31	1.05517e+06	34.8911	40.8512	FBLN1|30	RDVLLEACCADGHR	3	8;9	Carbamidomethyl@C;Carbamidomethyl@C	64	14	RDVLLEACCADGHR	1	91067	91080	0.340898	0.361777	0.23566	-0.516136	0.373044	0.390944	0.255702	-0.507428	36.3385	36.85	-0.511465	13	6	MOCK
681.355	58.8019	LSM3|7_REQQTTNTVEEPLDLIR_3	53.8	63.8	681.356	681.354	681.355	9531	3	27	3634.26	8642220	56.8548	62.8303	LSM3|7	REQQTTNTVEEPLDLIR	3	NA	NA	78	17	REQQTTNTVEEPLDLIR	3	132237	132253	0.297934	0.345991	0.224914	-0.448764	0.298194	0.345368	0.224492	-0.412134	60.571	58.8	1.77097	13	6	MOCK
520.925	34.7462	CPSF7|33_RDVLTATSQPSDDR_3	29.75	39.75	520.926	520.924	520.925	3286	3	27	2015.6	510969	32.5787	38.5533	CPSF7|33	RDVLTATSQPSDDR	3	NA	NA	61	14	RDVLTATSQPSDDR	1	82747	82760	0.257801	0.288584	0.186369	-0.348374	0.289306	0.317235	0.205509	-0.301887	33.5934	34.75	-1.15661	13	6	MOCK
794.019	50.9195	EIF4B|46_RDLEGDVSTTWHSNDDDVYR_3	45.92	55.92	794.02	794.018	794.019	7539	3	27	3114.15	2.83404e+06	48.9252	54.893	EIF4B|46	RDLEGDVSTTWHSNDDDVYR	3	NA	NA	83	20	RDLEGDVSTTWHSNDDDVYR	3	138671	138690	0.256528	0.305865	0.197891	-0.162857	0.295029	0.340209	0.220996	-0.164238	51.9025	50.92	0.982534	13	6	MOCK
364.519	25.9378	CENPU|49_RDSDVSSIGR_3	20.94	30.94	364.521	364.519	364.519	1378	3	27	1510.52	2.98725e+06	24.1864	30.1399	CENPU|49	RDSDVSSIGR	3	NA	NA	19	10	RDSDVSSIGR	1	19065	19074	0.217924	0.260759	0.167946	-0.213771	0.210189	0.253395	0.163094	-0.22278	25.1753	25.94	-0.764676	13	6	MOCK
542.269	42.9302	CASP3|29_SGISLDNSYK_2	37.93	47.93	542.27	542.269	542.269	5814	2	27	2669.33	186026	41.2337	47.195	CASP3|29	SGISLDNSYK	2	NA	NA	15	10	SGISLDNSYK	1	14016	14025	0.179764	0.22735	0.146013	-0.13964	0.191811	0.238507	0.153316	-0.13964	44.4888	42.93	1.55875	13	6	MOCK
443.882	22.4798	TNFRSF12A|28_REQAPGTAPCSR_3	17.48	27.48	443.884	443.882	443.883	1489	3	27	1540.74	239886	21.4047	27.3928	TNFRSF12A|28	REQAPGTAPCSR	3	10	Carbamidomethyl@C	33	12	REQAPGTAPCSR	1	37688	37699	0.149599	0.194427	0.12457	-0.33284	0.181997	0.224736	0.144304	-0.326779	25.679	22.48	3.199	13	6	MOCK
557.299	44.2714	PLA2R1|21_EGVAAALTPER_2	39.27	49.27	557.3	557.298	557.299	5628	2	27	2621.69	1.37584e+06	42.348	48.3289	PLA2R1|21	EGVAAALTPER	2	NA	NA	23	11	EGVAAALTPER	1	24391	24401	0.13946	0.195275	0.12512	-0.185272	0.12115	0.179054	0.114607	-0.260976	43.6948	44.27	-0.575225	13	6	MOCK
598.297	34.4875	ENG|26_RETVHCDLQPVGPER_3	29.49	39.49	598.298	598.296	598.297	3192	3	27	1990.94	52633.7	32.5826	38.5611	ENG|26	RETVHCDLQPVGPER	3	6	Carbamidomethyl@C	69	15	RETVHCDLQPVGPER	1	107161	107175	0.124971	0.163459	0.10453	-0.3838	0.0922308	0.134543	0.0859133	-0.438346	33.1824	34.49	-1.3076	13	6	MOCK
630.957	51.6242	HSP90B1|22_RDDEVDVDGTVEEDLGK_3	46.62	56.62	630.958	630.956	630.957	8124	3	27	3264.67	2.49655e+06	49.8716	55.8622	HSP90B1|22	RDDEVDVDGTVEEDLGK	3	NA	NA	77	17	RDDEVDVDGTVEEDLGK	2	129581	129597	0.0969068	0.147317	0.0941276	-0.0478481	0.125189	0.176292	0.112821	-0.139721	54.4111	51.62	2.79111	13	6	MOCK
702.834	41.5014	CPSF7|33_DVLTATSQPSDDR_2	36.5	46.5	702.835	702.833	702.834	5507	2	27	2591.53	498937	39.7084	45.6559	CPSF7|33	DVLTATSQPSDDR	2	NA	NA	46	13	DVLTATSQPSDDR	1	56920	56932	0.0684206	0.12287	0.0784196	-0.0504234	0.0548874	0.111019	0.0708226	-0.238765	43.1922	41.5	1.69223	13	6	MOCK
832.87	52.702	TMEM59|36_EAFDSVLGDTASCHR_2	47.7	57.7	832.871	832.869	832.87	7641	2	27	3140.75	2.1494e+06	51.0544	57.0203	TMEM59|36	EAFDSVLGDTASCHR	2	13	Carbamidomethyl@C	66	15	EAFDSVLGDTASCHR	1	95863	95877	0.0603492	0.103684	0.0661262	-0.398838	0.101115	0.140629	0.0898249	-0.305161	52.3459	52.7	-0.354126	13	6	MOCK
559.957	43.3358	P4HB|18_RDAPEEEDHVLVLR_3	38.34	48.34	559.958	559.956	559.957	5576	3	27	2608.24	1.80818e+06	41.2843	47.2622	P4HB|18	RDAPEEEDHVLVLR	3	NA	NA	55	14	RDAPEEEDHVLVLR	1	72126	72139	0.0365332	0.0960114	0.061217	-0.550969	0.0460727	0.100686	0.0642073	-0.50636	43.4707	43.34	0.130694	13	6	MOCK
467.733	29.7107	CENPU|49_NSDVSSIGR_2	24.71	34.71	467.734	467.732	467.733	2195	2	27	1728.24	61802.2	27.888	33.8322	CENPU|49	NSDVSSIGR	2	NA	NA	11	9	NSDVSSIGR	1	9366	9374	0.0302008	0.107747	0.0687273	-0.286474	0.0241629	0.103136	0.0657757	-0.359787	28.804	29.71	-0.905991	13	6	MOCK
576.587	27.2043	IGFBP4|22_RDEAIHCPPCSEEK_3	22.2	32.2	576.588	576.586	576.587	2325	3	27	1762.29	89798.6	25.3377	31.3149	IGFBP4|22	RDEAIHCPPCSEEK	3	7;10	Carbamidomethyl@C;Carbamidomethyl@C	62	14	RDEAIHCPPCSEEK	1	86101	86114	0.00408855	0.0568157	0.0361896	-0.0683855	0.0421201	0.0916337	0.0584178	-0.291727	29.3715	27.2	2.17153	13	6	MOCK
337.187	35.4809	CALR|18_REPAVYFK_3	30.48	40.48	337.188	337.186	337.187	3121	3	27	1972.44	190672	32.874	38.8187	CALR|18	REPAVYFK	3	NA	NA	3	8	REPAVYFK	0	2071	2078	0	0	0	-0.557198	0	0	0	-0.319376	32.874	35.48	-2.60604	13	6	MOCK
786.327	31.4927	IGFBP4|22_DEAIHCPPCSEEK_2	26.49	36.49	786.328	786.326	786.327	2388	2	27	1779.06	228619	29.651	35.6228	IGFBP4|22	DEAIHCPPCSEEK	2	6;9	Carbamidomethyl@C;Carbamidomethyl@C	54	13	DEAIHCPPCSEEK	0	69460	69472	0	0	0	0.0935193	0	0	0	-0.317846	29.651	31.49	-1.839	13	6	MOCK
806.875	19.0125	SHMT2|27_QHSNAAQTQTGEANR_2	14.01	24.01	806.876	806.874	806.875	104	2	27	1111.15	15795.7	18.5192	24.4974	SHMT2|27	QHSNAAQTQTGEANR	2	NA	NA	67	15	QHSNAAQTQTGEANR	0	98005	98019	0	0	0	0.434211	0	0	0	-0.346719	18.5192	19.01	-0.490753	13	6	MOCK
590.614	17.8991	SHMT2|27_REHSNAAQTQTGEANR_3	12.9	22.9	590.615	590.613	590.614	1	3	27	1067.29	10707.2	17.7881	23.7621	SHMT2|27	REHSNAAQTQTGEANR	3	NA	NA	73	16	REHSNAAQTQTGEANR	0	114707	114722	0	0	0	-0.0196999	0	0	0	-0.500528	17.7881	17.9	-0.111868	13	6	MOCK
848.393	68.08	UQCRHL|15_RDPEEEEEEEEELVDPLTTVR_3	63.08	73.08	848.394	848.392	848.393	10805	3	27	3995.22	505410	66.5871	72.5782	UQCRHL|15	RDPEEEEEEEEELVDPLTTVR	3	NA	NA	84	21	RDPEEEEEEEEELVDPLTTVR	0	140457	140477	0	0	0	0.238514	0	0	0	-0.429372	66.5871	68.08	-1.49293	13	6	MOCK
745.392	59.9233	PRTC11_SFANQPLEVVYSK_2	54.92	64.92	745.393	745.391	745.392	9073	2	27	3533.37	58818440	57.9508	63.9361	PRTC11	SFANQPLEVVYSK	2	13	Label:13C(6)15N(2)@K	45	13	SFANQPLEVVYSk	16	53342	53354	0.9864	0.988422	0.903032	0.860508	0.965501	0.970705	0.845524	0.731709	58.8895	59.92	-1.03045	14	6	MOCK
773.895	53.205	PRTC08_ELGQSGVDTYLQTK_2	48.21	58.21	773.896	773.894	773.895	7671	2	27	3162.37	6.39552e+06	51.4214	57.3767	PRTC08	ELGQSGVDTYLQTK	2	14	Label:13C(6)15N(2)@K	56	14	ELGQSGVDTYLQTk	12	73161	73174	0.986355	0.98857	0.903654	0.868309	0.909275	0.924704	0.751375	0.791001	52.7062	53.21	-0.503786	14	6	MOCK
451.283	34.9206	PRTC04_DIPVPKPK_2	29.92	39.92	451.284	451.282	451.283	3903	2	27	2187.03	170404	33.3785	39.3352	PRTC04	DIPVPKPK	2	8	Label:13C(6)15N(2)@K	2	8	DIPVPKPk	4	1435	1442	0.971701	0.972156	0.849418	0.392173	0.985824	0.986316	0.894563	0.393268	36.4505	34.92	1.53053	14	6	MOCK
415.74	33.151	MTHFD2|36_EAVVISGR_2	28.15	38.15	415.741	415.739	415.74	2891	2	27	1920.25	137629	31.139	37.1096	MTHFD2|36	EAVVISGR	2	NA	NA	4	8	EAVVISGR	4	3423	3430	0.958708	0.961165	0.821999	0.393268	0.958244	0.960899	0.821387	0.393268	32.0041	33.15	-1.14591	14	6	MOCK
761.381	51.6026	P4HB|18_DAPEEEDHVLVLR_2	46.6	56.6	761.382	761.38	761.381	7051	2	27	3001.11	586721	49.7246	55.7019	P4HB|18	DAPEEEDHVLVLR	2	NA	NA	51	13	DAPEEEDHVLVLR	16	61850	61862	0.955221	0.959172	0.817459	0.583587	0.871378	0.890941	0.699909	0.575065	50.0184	51.6	-1.58155	14	6	MOCK
682.849	48.3756	SSBP1|17_ESETTTSLVLER_2	43.38	53.38	682.85	682.848	682.849	6442	2	27	2838.46	1.6576e+06	46.6992	52.6294	SSBP1|17	ESETTTSLVLER	2	NA	NA	34	12	ESETTTSLVLER	10	38082	38093	0.947228	0.955924	0.810285	0.751797	0.940185	0.950363	0.798575	0.751797	47.3077	48.38	-1.07233	14	6	MOCK
680.374	71.767	PRTC14_ELASGLSFPVGFK_2	66.77	76.77	680.375	680.372	680.373	12010	2	27	4336.02	962913	69.6844	75.6552	PRTC14	ELASGLSFPVGFK	2	13	Label:13C(6)15N(2)@K	48	13	ELASGLSFPVGFk	11	58142	58154	0.92852	0.939185	0.776835	0.778495	0.81512	0.843073	0.638511	0.817683	72.267	71.77	0.497002	14	6	MOCK
801.411	60.0386	PRTC10_GILFVGSGVSGGEEGAR_2	55.04	65.04	801.412	801.41	801.411	9389	2	27	3615.52	489144	58.3111	64.2943	PRTC10	GILFVGSGVSGGEEGAR	2	17	Label:13C(6)15N(4)@R	79	17	GILFVGSGVSGGEEGAr	11	133365	133381	0.928389	0.934193	0.767758	0.616163	0.635297	0.670915	0.468197	0.48473	60.2587	60.04	0.218679	14	6	MOCK
787.421	72.8278	PRTC15_LSSEAPALFQFDLK_2	67.83	77.83	787.422	787.42	787.421	12195	2	27	4386.44	12931780	70.879	76.8493	PRTC15	LSSEAPALFQFDLK	2	14	Label:13C(6)15N(2)@K	63	14	LSSEAPALFQFDLk	9	87006	87019	0.920786	0.918214	0.740737	-0.264194	0.867697	0.864085	0.664204	-0.184368	73.1073	72.83	0.277313	14	6	MOCK
498.802	63.8572	PRTC12_LTILEELR_2	58.86	68.86	498.803	498.801	498.802	9869	2	27	3743.41	176094	61.8876	67.8547	PRTC12	LTILEELR	2	8	Label:13C(6)15N(4)@R	7	8	LTILEELr	6	5768	5775	0.914092	0.923212	0.748891	0.554461	0.541268	0.607359	0.415542	0.122879	62.3901	63.86	-1.46987	14	6	MOCK
836.415	69.2789	SQSTM1|421_NYDIGAALDTIQYSK_2	64.28	74.28	836.416	836.414	836.415	11520	2	27	4208.97	6329152	67.4478	73.4359	SQSTM1|421	NYDIGAALDTIQYSK	2	NA	NA	71	15	NYDIGAALDTIQYSK	7	112350	112364	0.906145	0.91482	0.735335	0.206425	0.899916	0.909218	0.726639	0.205878	70.1496	69.28	0.869564	14	6	MOCK
573.302	67.5684	PRTC13_NGFILDGFPR_2	62.57	72.57	573.303	573.301	573.302	11296	2	27	4151.16	50887.6	65.7182	71.6753	PRTC13	NGFILDGFPR	2	10	Label:13C(6)15N(4)@R	20	10	NGFILDGFPr	4	21541	21550	0.889279	0.899777	0.712542	0.634492	0.759028	0.774922	0.564422	0.626512	69.186	67.57	1.61598	14	6	MOCK
496.287	29.929	PRTC03_HVLTSIGEK_2	24.93	34.93	496.288	496.286	496.287	3274	2	27	2021.72	156808	28.2329	34.1873	PRTC03	HVLTSIGEK	2	9	Label:13C(6)15N(2)@K	13	9	HVLTSIGEk	3	11640	11648	0.881251	0.889675	0.698138	0.357038	0.891684	0.90091	0.714199	0.0172287	33.6953	29.93	3.76526	14	6	MOCK
761.368	41.0085	FLNA|1502_NADGTQTVNYVPSR_2	36.01	46.01	761.369	761.367	761.368	4835	2	27	2431.31	403073	39.5101	45.4697	FLNA|1502	NADGTQTVNYVPSR	2	NA	NA	60	14	NADGTQTVNYVPSR	3	80220	80233	0.874049	0.872007	0.674364	-0.0389738	0.857181	0.857158	0.655544	0.00913519	40.5218	41.01	-0.488215	14	6	MOCK
760.356	53.4877	BAX|66_IGDELDSNMELQR_2	48.49	58.49	760.357	760.356	760.356	7816	2	27	3200.08	671023	51.6257	57.5932	BAX|66	IGDELDSNMELQR	2	NA	NA	44	13	IGDELDSNMELQR	5	51290	51302	0.818938	0.832049	0.625665	0.076422	0.815369	0.828711	0.621851	0.0811985	53.3347	53.49	-0.155292	14	6	MOCK
560.276	37.7312	FLNA|1502_RDADGTQTVNYVPSR_3	32.73	42.73	560.277	560.275	560.276	4597	3	27	2367.31	604479	36.0624	41.9976	FLNA|1502	RDADGTQTVNYVPSR	3	NA	NA	70	15	RDADGTQTVNYVPSR	2	109942	109956	0.816509	0.807866	0.598756	-0.276623	0.823319	0.816531	0.608211	-0.190465	39.4552	37.73	1.72521	14	6	MOCK
558.326	56.6711	PRTC09_GLILVGGYGTR_2	51.67	61.67	558.327	558.325	558.326	9464	2	27	3635.48	633805	54.8159	60.8035	PRTC09	GLILVGGYGTR	2	11	Label:13C(6)15N(4)@R	29	11	GLILVGGYGTr	4	32787	32797	0.808297	0.827639	0.620633	0.755816	0.621184	0.654824	0.454514	0.460319	60.5913	56.67	3.92133	14	6	MOCK
493.768	26.3416	PRTC01_SSAAPPPPPR_2	21.34	31.34	493.769	493.767	493.768	2076	2	27	1703.47	130293	24.813	30.777	PRTC01	SSAAPPPPPR	2	10	Label:13C(6)15N(4)@R	18	10	SSAAPPPPPr	7	17995	18004	0.799318	0.830471	0.623857	0.32175	0.668017	0.718578	0.510413	0.175804	28.3912	26.34	2.0512	14	6	MOCK
695.832	45.6162	PRTC06_TASEFDSAIAQDK_2	40.62	50.62	695.833	695.831	695.832	5817	2	27	2679.61	4095062	43.63	49.5791	PRTC06	TASEFDSAIAQDK	2	13	Label:13C(6)15N(2)@K	43	13	TASEFDSAIAQDk	14	48974	48986	0.791397	0.831693	0.625256	0.605894	0.872088	0.893904	0.704088	0.454841	44.6602	45.62	-0.959808	14	6	MOCK
570.276	58.136	PDIA3|26_RDVLELTDDNFESR_3	53.14	63.14	570.277	570.275	570.276	9026	3	27	3522.53	967823	56.2417	62.2053	PDIA3|26	RDVLELTDDNFESR	3	NA	NA	65	14	RDVLELTDDNFESR	1	93220	93233	0.775623	0.755985	0.545684	-0.248186	0.777842	0.757788	0.54744	-0.344019	58.7088	58.14	0.568822	14	6	MOCK
427.226	43.2527	CALR|18_EPAVYFK_2	38.25	48.25	427.227	427.225	427.226	5069	2	27	2491.76	1.92136e+06	41.4442	47.4101	CALR|18	EPAVYFK	2	NA	NA	1	7	EPAVYFK	5	12	18	0.771762	0.808579	0.599526	0.767826	0.781052	0.81572	0.607318	0.787826	41.5293	43.25	-1.7207	14	6	MOCK
587.269	26.2323	TNFRSF12A|28_EQAPGTAPCSR_2	21.23	31.23	587.27	587.269	587.269	1479	2	27	1542.84	34326.5	24.5094	30.4963	TNFRSF12A|28	EQAPGTAPCSR	2	9	Carbamidomethyl@C	28	11	EQAPGTAPCSR	2	29627	29637	0.758494	0.756973	0.546645	0.0678236	0.861635	0.853455	0.650994	0.00140709	25.714	26.23	-0.516004	14	6	MOCK
613.317	30.6463	PRTC02_GISNEGQNASIK_2	25.65	35.65	613.318	613.316	613.317	2583	2	27	1836.06	1.06242e+06	29.0717	35.0529	PRTC02	GISNEGQNASIK	2	12	Label:13C(6)15N(2)@K	40	12	GISNEGQNASIk	11	44781	44792	0.745521	0.787157	0.576895	0.63129	0.551573	0.608147	0.416174	0.371036	30.6009	30.65	-0.049069	14	6	MOCK
422.736	38.5693	PRTC05_IGDYAGIK_2	33.57	43.57	422.737	422.735	422.736	4285	2	27	2285.79	3.60457e+06	36.7784	42.7128	PRTC05	IGDYAGIK	2	8	Label:13C(6)15N(2)@K	6	8	IGDYAGIk	7	4725	4732	0.744728	0.777571	0.567097	0.547072	0.181808	0.310699	0.201126	0.531199	38.0964	38.57	-0.47356	14	6	MOCK
818.891	39.83	ENG|26_ETVHCDLQPVGPER_2	34.83	44.83	818.892	818.89	818.891	4452	2	27	2327.91	109552	38.0274	43.9784	ENG|26	ETVHCDLQPVGPER	2	5	Carbamidomethyl@C	58	14	ETVHCDLQPVGPER	3	78023	78036	0.72637	0.737491	0.527979	-0.15581	0.814433	0.813637	0.605031	-0.155724	38.7984	39.83	-1.03158	14	6	MOCK
586.8	46.4127	PRTC07_SAAGAFGPELSR_2	41.41	51.41	586.801	586.799	586.8	6379	2	27	2822.16	1.61742e+06	44.6125	50.5881	PRTC07	SAAGAFGPELSR	2	12	Label:13C(6)15N(4)@R	32	12	SAAGAFGPELSr	11	33506	33517	0.691534	0.738003	0.528462	0.637773	0.335408	0.423916	0.278689	0.380973	47.036	46.41	0.62602	14	6	MOCK
752.854	54.3255	HSP90B1|24_EVDVDGTVEEDLGK_2	49.33	59.33	752.855	752.853	752.854	8740	2	27	3446.09	2.25063e+06	52.383	58.3304	HSP90B1|24	EVDVDGTVEEDLGK	2	NA	NA	57	14	EVDVDGTVEEDLGK	1	77295	77308	0.673968	0.665295	0.463389	-0.0204901	0.634671	0.623679	0.428725	-0.14057	57.4348	54.33	3.10478	14	6	MOCK
554.272	47.8065	HSP90B1|24_REVDVDGTVEEDLGK_3	42.81	52.81	554.273	554.271	554.272	7115	3	27	3017.94	863704	45.8068	51.7516	HSP90B1|24	REVDVDGTVEEDLGK	3	NA	NA	68	15	REVDVDGTVEEDLGK	2	105420	105434	0.656539	0.657534	0.456801	0.00126451	0.63619	0.637462	0.440031	-0.154751	50.299	47.81	2.48899	14	6	MOCK
507.602	41.2944	SSBP1|17_RESETTTSLVLER_3	36.29	46.29	507.603	507.601	507.602	5830	3	27	2682.91	350327	39.4164	45.3744	SSBP1|17	RESETTTSLVLER	3	NA	NA	49	13	RESETTTSLVLER	1	61550	61562	0.644106	0.635765	0.43863	-0.354538	0.61643	0.612613	0.419763	-0.305688	44.7151	41.29	3.4251	14	6	MOCK
681.355	58.8019	LSM3|7_REQQTTNTVEEPLDLIR_3	53.8	63.8	681.356	681.354	681.355	9420	3	27	3623.76	5871813	56.8738	62.8398	LSM3|7	REQQTTNTVEEPLDLIR	3	NA	NA	78	17	REQQTTNTVEEPLDLIR	1	131173	131189	0.610216	0.603986	0.412844	-0.395627	0.606248	0.602154	0.411381	-0.358997	60.396	58.8	1.59601	14	6	MOCK
590.614	17.8991	SHMT2|27_REHSNAAQTQTGEANR_3	12.9	22.9	590.615	590.613	590.614	324	3	27	1184.39	7502.6	17.7862	23.777	SHMT2|27	REHSNAAQTQTGEANR	3	NA	NA	73	16	REHSNAAQTQTGEANR	1	117071	117086	0.609126	0.607671	0.415792	0.0770214	0.281051	0.306759	0.198489	-0.416921	19.7399	17.9	1.83988	14	6	MOCK
594.299	39.5989	FKBP11|26_EAGLETESPVR_2	34.6	44.6	594.3	594.298	594.299	5285	2	27	2544.02	372225	37.7531	43.7266	FKBP11|26	EAGLETESPVR	2	NA	NA	26	11	EAGLETESPVR	2	26767	26777	0.607353	0.62147	0.426928	0.0321763	0.608795	0.623222	0.428353	0.0321763	42.4003	39.6	2.80032	14	6	MOCK
337.187	35.4809	CALR|18_REPAVYFK_3	30.48	40.48	337.188	337.186	337.187	3231	3	27	2010.57	102406	32.8711	38.8185	CALR|18	REPAVYFK	3	NA	NA	3	8	REPAVYFK	1	2177	2184	0.576975	0.58882	0.400815	-0.35769	0.511381	0.532973	0.357851	-0.134647	33.5095	35.48	-1.97051	14	6	MOCK
764.835	69.703	ATF4|76_EDAFSGTDWMLEK_2	64.7	74.7	764.836	764.834	764.835	12235	2	27	4397.24	1.0831e+06	67.8004	73.7659	ATF4|76	EDAFSGTDWMLEK	2	NA	NA	42	13	EDAFSGTDWMLEK	2	48458	48470	0.570408	0.592034	0.403349	0.0286583	0.55282	0.57566	0.39051	0.0236648	73.2873	69.7	3.5873	14	6	MOCK
607.616	43.539	TMEM59|36_REAFDSVLGDTASCHR_3	38.54	48.54	607.617	607.615	607.616	5259	3	27	2537.84	10545537	41.4801	47.44	TMEM59|36	REAFDSVLGDTASCHR	3	14	Carbamidomethyl@C	75	16	REAFDSVLGDTASCHR	1	124526	124541	0.539677	0.538925	0.362339	-0.439817	0.532765	0.534776	0.359208	-0.403807	42.2973	43.54	-1.24271	14	6	MOCK
776.86	67.1829	PDIA3|26_DVLELTDDNFESR_2	62.18	72.18	776.861	776.859	776.86	11585	2	27	4226.04	1.08596e+06	65.2766	71.2673	PDIA3|26	DVLELTDDNFESR	2	NA	NA	52	13	DVLELTDDNFESR	2	66686	66698	0.520367	0.540577	0.363588	0.0186713	0.547608	0.564161	0.381601	-0.103181	70.434	67.18	3.25404	14	6	MOCK
628.299	27.7828	ERO1A|24_EEQPPETAAQR_2	22.78	32.78	628.3	628.298	628.299	1883	2	27	1651.94	76469.9	25.9681	31.9593	ERO1A|24	EEQPPETAAQR	2	NA	NA	22	11	EEQPPETAAQR	1	22737	22747	0.515714	0.532789	0.357712	-0.0678236	0.824734	0.817741	0.609548	-0.202439	27.5324	27.78	-0.247585	14	6	MOCK
758.338	44.9663	FBLN1|30_DVLLEACCADGHR_2	39.97	49.97	758.339	758.337	758.338	5555	2	27	2612.67	845435	43.0757	49.0472	FBLN1|30	DVLLEACCADGHR	2	7;8	Carbamidomethyl@C;Carbamidomethyl@C	53	13	DVLLEACCADGHR	1	67106	67118	0.49399	0.500123	0.333424	-0.442738	0.534268	0.538785	0.362233	-0.442738	43.5446	44.97	-1.42544	14	6	MOCK
867.881	58.2026	HSP90B1|22_DDEVDVDGTVEEDLGK_2	53.2	63.2	867.882	867.88	867.881	8543	2	27	3393.82	1.05779e+06	56.1362	62.0797	HSP90B1|22	DDEVDVDGTVEEDLGK	2	NA	NA	74	16	DDEVDVDGTVEEDLGK	2	121631	121646	0.482048	0.503538	0.335937	0.467296	0.367274	0.403649	0.264517	-0.288969	56.5636	58.2	-1.63638	14	6	MOCK
448.569	33.1905	FKBP11|26_REAGLETESPVR_3	28.19	38.19	448.57	448.568	448.569	2875	3	27	1915.93	389366	31.011	36.9732	FKBP11|26	REAGLETESPVR	3	NA	NA	39	12	REAGLETESPVR	1	42768	42779	0.422282	0.440893	0.290676	-0.326779	0.414267	0.434347	0.286042	-0.320719	31.9322	33.19	-1.25777	14	6	MOCK
848.393	68.08	UQCRHL|15_RDPEEEEEEEEELVDPLTTVR_3	63.08	73.08	848.394	848.392	848.393	11581	3	27	4224.98	1.97349e+06	66.5891	72.5659	UQCRHL|15	RDPEEEEEEEEELVDPLTTVR	3	NA	NA	84	21	RDPEEEEEEEEELVDPLTTVR	2	142378	142398	0.391847	0.413746	0.27156	0.238502	0.365354	0.391569	0.256135	-0.330649	70.4164	68.08	2.33638	14	6	MOCK
605.827	72.7819	BCL2|130_FATVVEELFR_2	67.78	77.78	605.828	605.826	605.827	11656	2	27	4245.22	5052322	70.7537	76.7187	BCL2|130	FATVVEELFR	2	NA	NA	16	10	FATVVEELFR	1	14548	14557	0.371617	0.402204	0.263512	-0.281853	0.330131	0.365673	0.238323	-0.22278	70.7537	72.78	-2.02633	14	6	MOCK
557.299	44.2714	PLA2R1|21_EGVAAALTPER_2	39.27	49.27	557.3	557.298	557.299	5925	2	27	2708.03	190496	42.3556	48.3212	PLA2R1|21	EGVAAALTPER	2	NA	NA	23	11	EGVAAALTPER	1	24547	24557	0.369899	0.396941	0.259856	-0.156004	0.386608	0.411647	0.270093	-0.217073	45.1339	44.27	0.863884	14	6	MOCK
557.928	36.8535	FBLN1|30_RDVLLEACCADGHR_3	31.85	41.85	557.929	557.927	557.928	3852	3	27	2173.91	795788	34.9145	40.8624	FBLN1|30	RDVLLEACCADGHR	3	8;9	Carbamidomethyl@C;Carbamidomethyl@C	64	14	RDVLLEACCADGHR	1	90308	90321	0.340898	0.361777	0.23566	-0.516136	0.373044	0.390944	0.255702	-0.507428	36.2319	36.85	-0.6181	14	6	MOCK
584.304	60.3621	P4HA3|29_DTFSALTSVAR_2	55.36	65.36	584.305	584.303	584.304	9715	2	27	3702.35	899218	58.3893	64.3496	P4HA3|29	DTFSALTSVAR	2	NA	NA	27	11	DTFSALTSVAR	3	28057	28067	0.30956	0.386788	0.252831	-0.162289	0.293159	0.371968	0.242634	-0.237993	61.7059	60.36	1.34587	14	6	MOCK
496.295	48.7357	ERN1|280_LTPTLYVGK_2	43.74	53.74	496.296	496.294	496.295	7034	2	27	2996.68	119257	46.9766	52.9416	ERN1|280	LTPTLYVGK	2	NA	NA	14	9	LTPTLYVGK	2	12536	12544	0.28159	0.349525	0.227314	-0.0976906	0.510444	0.54768	0.368978	-0.00513196	49.9447	48.74	1.20475	14	6	MOCK
520.925	34.7462	CPSF7|33_RDVLTATSQPSDDR_3	29.75	39.75	520.926	520.924	520.925	3238	3	27	2012.21	1.15913e+06	32.5718	38.527	CPSF7|33	RDVLTATSQPSDDR	3	NA	NA	61	14	RDVLTATSQPSDDR	1	82079	82092	0.257801	0.288584	0.186369	-0.348374	0.289306	0.317235	0.205509	-0.301887	33.5368	34.75	-1.21322	14	6	MOCK
794.019	50.9195	EIF4B|46_RDLEGDVSTTWHSNDDDVYR_3	45.92	55.92	794.02	794.018	794.019	7451	3	27	3105.56	5.47206e+06	48.9328	54.9131	EIF4B|46	RDLEGDVSTTWHSNDDDVYR	3	NA	NA	83	20	RDLEGDVSTTWHSNDDDVYR	1	137576	137595	0.238875	0.263318	0.169634	-0.154751	0.26558	0.287671	0.185762	-0.267929	51.7594	50.92	0.839389	14	6	MOCK
364.519	25.9378	CENPU|49_RDSDVSSIGR_3	20.94	30.94	364.521	364.519	364.519	2414	3	27	1792.35	351558	24.1827	30.1718	CENPU|49	RDSDVSSIGR	3	NA	NA	19	10	RDSDVSSIGR	1	20164	20173	0.181153	0.226982	0.145772	-0.231789	0.171062	0.217408	0.139521	-0.231789	29.8726	25.94	3.93257	14	6	MOCK
598.297	34.4875	ENG|26_RETVHCDLQPVGPER_3	29.49	39.49	598.298	598.296	598.297	3066	3	27	1967.43	161758	32.5757	38.5687	ENG|26	RETVHCDLQPVGPER	3	6	Carbamidomethyl@C	69	15	RETVHCDLQPVGPER	1	106190	106204	0.124971	0.163459	0.10453	-0.3838	0.0922308	0.134543	0.0859133	-0.438346	32.7905	34.49	-1.69951	14	6	MOCK
542.269	42.9302	CASP3|29_SGISLDNSYK_2	37.93	47.93	542.27	542.269	542.269	5652	2	27	2637.08	1.18754e+06	41.2191	47.168	CASP3|29	SGISLDNSYK	2	NA	NA	15	10	SGISLDNSYK	2	13846	13855	0.114357	0.173461	0.11099	-0.0879022	0.102467	0.162927	0.104187	-0.0969112	43.9514	42.93	1.02139	14	6	MOCK
630.957	51.6242	HSP90B1|22_RDDEVDVDGTVEEDLGK_3	46.62	56.62	630.958	630.956	630.957	7989	3	27	3245.19	2.63823e+06	49.8695	55.8541	HSP90B1|22	RDDEVDVDGTVEEDLGK	3	NA	NA	77	17	RDDEVDVDGTVEEDLGK	2	128469	128485	0.102913	0.157146	0.100458	-0.0478481	0.129775	0.185032	0.118478	-0.139721	54.0864	51.62	2.46642	14	6	MOCK
702.834	41.5014	CPSF7|33_DVLTATSQPSDDR_2	36.5	46.5	702.835	702.833	702.834	5873	2	27	2694.34	481497	39.6905	45.6526	CPSF7|33	DVLTATSQPSDDR	2	NA	NA	46	13	DVLTATSQPSDDR	1	56906	56918	0.0684206	0.12287	0.0784196	-0.0504234	0.0548874	0.111019	0.0708226	-0.238765	44.9057	41.5	3.40566	14	6	MOCK
832.87	52.702	TMEM59|36_EAFDSVLGDTASCHR_2	47.7	57.7	832.871	832.869	832.87	7569	2	27	3136.73	3.35351e+06	51.0504	57.0406	TMEM59|36	EAFDSVLGDTASCHR	2	13	Carbamidomethyl@C	66	15	EAFDSVLGDTASCHR	1	95102	95116	0.0603492	0.103684	0.0661262	-0.398838	0.101115	0.140629	0.0898249	-0.305161	52.2789	52.7	-0.42114	14	6	MOCK
329.53	27.6908	MTHFD2|36_REAVVISGR_3	22.69	32.69	329.531	329.529	329.53	2661	3	27	1857.86	327980	25.6353	31.6	MTHFD2|36	REAVVISGR	3	NA	NA	10	9	REAVVISGR	2	9000	9008	0.0496376	0.131779	0.0841379	-0.132881	0.0402705	0.122991	0.0784975	-0.0520527	30.9643	27.69	3.27434	14	6	MOCK
559.957	43.3358	P4HB|18_RDAPEEEDHVLVLR_3	38.34	48.34	559.958	559.956	559.957	6111	3	27	2755.35	1.07731e+06	41.3068	47.2359	P4HB|18	RDAPEEEDHVLVLR	3	NA	NA	55	14	RDAPEEEDHVLVLR	1	72251	72264	0.00649971	0.069614	0.0443536	-0.555323	-0.0410417	0.0227475	0.0144828	-0.541193	45.9225	43.34	2.58249	14	6	MOCK
576.587	27.2043	IGFBP4|22_RDEAIHCPPCSEEK_3	22.2	32.2	576.588	576.586	576.587	2632	3	27	1849.42	106483	25.3417	31.2957	IGFBP4|22	RDEAIHCPPCSEEK	3	7;10	Carbamidomethyl@C;Carbamidomethyl@C	62	14	RDEAIHCPPCSEEK	1	85901	85914	0.00408855	0.0568157	0.0361896	-0.0683855	0.0421201	0.0916337	0.0584178	-0.291727	30.8237	27.2	3.62365	14	6	MOCK
467.733	29.7107	CENPU|49_NSDVSSIGR_2	24.71	34.71	467.734	467.732	467.733	1958	2	27	1672.32	163985	27.8721	33.8253	CENPU|49	NSDVSSIGR	2	NA	NA	11	9	NSDVSSIGR	0	9144	9152	0	0	0	-0.383065	0	0	0	-0.456378	27.8721	29.71	-1.83793	14	6	MOCK
443.882	22.4798	TNFRSF12A|28_REQAPGTAPCSR_3	17.48	27.48	443.884	443.882	443.883	619	3	27	1284.38	34932.1	21.4063	27.3832	TNFRSF12A|28	REQAPGTAPCSR	3	10	Carbamidomethyl@C	33	12	REQAPGTAPCSR	0	34826	34837	0	0	0	-0.444961	0	0	0	-0.444961	21.4063	22.48	-1.0737	14	6	MOCK
471.236	24.3151	ERO1A|24_REEQPPETAAQR_3	19.32	29.32	471.237	471.235	471.236	929	3	27	1379.04	110249	22.9841	28.9633	ERO1A|24	REEQPPETAAQR	3	NA	NA	37	12	REEQPPETAAQR	0	40029	40040	0	0	0	-0.444961	0	0	0	-0.496336	22.9841	24.32	-1.33593	14	6	MOCK
786.327	31.4927	IGFBP4|22_DEAIHCPPCSEEK_2	26.49	36.49	786.328	786.326	786.327	2358	2	27	1777.82	140895	29.6303	35.62	IGFBP4|22	DEAIHCPPCSEEK	2	6;9	Carbamidomethyl@C;Carbamidomethyl@C	54	13	DEAIHCPPCSEEK	0	68882	68894	0	0	0	0.0935193	0	0	0	-0.317846	29.6303	31.49	-1.85968	14	6	MOCK
806.875	19.0125	SHMT2|27_QHSNAAQTQTGEANR_2	14.01	24.01	806.876	806.874	806.875	105	2	27	1111.32	19058.3	18.5219	24.4976	SHMT2|27	QHSNAAQTQTGEANR	2	NA	NA	67	15	QHSNAAQTQTGEANR	0	97272	97286	0	0	0	0.434211	0	0	0	-0.346719	18.5219	19.01	-0.488057	14	6	MOCK
745.392	59.9233	PRTC11_SFANQPLEVVYSK_2	54.92	64.92	745.393	745.391	745.392	9226	2	27	3539.51	22940800	57.9552	63.919	PRTC11	SFANQPLEVVYSK	2	13	Label:13C(6)15N(2)@K	45	13	SFANQPLEVVYSk	15	54061	54073	0.987795	0.98951	0.907709	0.915545	0.964038	0.969343	0.841957	0.790871	58.9918	59.92	-0.928179	15	6	MG132
836.415	69.2789	SQSTM1|421_NYDIGAALDTIQYSK_2	64.28	74.28	836.416	836.414	836.415	11507	2	27	4173.64	16778796	67.4605	73.4156	SQSTM1|421	NYDIGAALDTIQYSK	2	NA	NA	71	15	NYDIGAALDTIQYSK	17	113269	113283	0.98707	0.989026	0.905598	0.874334	0.983975	0.986382	0.894819	0.863124	69.5606	69.28	0.28059	15	6	MG132
773.895	53.205	PRTC08_ELGQSGVDTYLQTK_2	48.21	58.21	773.896	773.894	773.895	7741	2	27	3147.2	6.43339e+06	51.4269	57.3811	PRTC08	ELGQSGVDTYLQTK	2	14	Label:13C(6)15N(2)@K	56	14	ELGQSGVDTYLQTk	14	74084	74097	0.98344	0.986196	0.894101	0.868864	0.905167	0.921558	0.746165	0.791898	52.4533	53.21	-0.756671	15	6	MG132
761.381	51.6026	P4HB|18_DAPEEEDHVLVLR_2	46.6	56.6	761.382	761.38	761.381	7224	2	27	3012.78	428382	49.7127	55.7031	P4HB|18	DAPEEEDHVLVLR	2	NA	NA	51	13	DAPEEEDHVLVLR	8	62737	62749	0.95469	0.9578	0.814395	0.395571	0.833817	0.837828	0.63235	0.112082	50.213	51.6	-1.38704	15	6	MG132
764.835	69.703	ATF4|76_EDAFSGTDWMLEK_2	64.7	74.7	764.836	764.834	764.835	11481	2	27	4166.87	3.65316e+06	67.8114	73.7721	ATF4|76	EDAFSGTDWMLEK	2	NA	NA	42	13	EDAFSGTDWMLEK	8	47509	47521	0.951246	0.956933	0.812485	0.596233	0.938051	0.945098	0.788067	0.600901	69.4478	69.7	-0.252241	15	6	MG132
451.283	34.9206	PRTC04_DIPVPKPK_2	29.92	39.92	451.284	451.282	451.283	4037	2	27	2213.04	117234	33.3545	39.3357	PRTC04	DIPVPKPK	2	8	Label:13C(6)15N(2)@K	2	8	DIPVPKPk	5	1561	1568	0.950261	0.956433	0.811391	0.536398	0.949861	0.956359	0.811229	0.536946	36.884	34.92	1.964	15	6	MG132
787.421	72.8278	PRTC15_LSSEAPALFQFDLK_2	67.83	77.83	787.422	787.42	787.421	12319	2	27	4386.65	9354701	70.8771	76.848	PRTC15	LSSEAPALFQFDLK	2	14	Label:13C(6)15N(2)@K	63	14	LSSEAPALFQFDLk	9	88176	88189	0.949715	0.949943	0.797718	0.12563	0.918692	0.917633	0.739805	0.199565	73.1109	72.83	0.280887	15	6	MG132
682.849	48.3756	SSBP1|17_ESETTTSLVLER_2	43.38	53.38	682.85	682.848	682.849	6543	2	27	2836.17	3979236	46.6705	52.6284	SSBP1|17	ESETTTSLVLER	2	NA	NA	34	12	ESETTTSLVLER	12	38583	38594	0.949328	0.957464	0.813652	0.747357	0.942755	0.952293	0.802563	0.747357	47.2694	48.38	-1.11056	15	6	MG132
801.411	60.0386	PRTC10_GILFVGSGVSGGEEGAR_2	55.04	65.04	801.412	801.41	801.411	9318	2	27	3563.53	1.14002e+06	58.316	64.2805	PRTC10	GILFVGSGVSGGEEGAR	2	17	Label:13C(6)15N(4)@R	79	17	GILFVGSGVSGGEEGAr	14	134328	134344	0.925913	0.93365	0.766791	0.677862	0.622108	0.662423	0.460943	0.432189	59.3921	60.04	-0.647914	15	6	MG132
680.374	71.767	PRTC14_ELASGLSFPVGFK_2	66.77	76.77	680.375	680.372	680.373	12134	2	27	4336.29	879520	69.6879	75.6581	PRTC14	ELASGLSFPVGFK	2	13	Label:13C(6)15N(2)@K	48	13	ELASGLSFPVGFk	11	58873	58885	0.925715	0.937132	0.77306	0.786854	0.825544	0.852115	0.64936	0.850141	72.2715	71.77	0.501489	15	6	MG132
498.802	63.8572	PRTC12_LTILEELR_2	58.86	68.86	498.803	498.801	498.802	9991	2	27	3742.61	185498	61.9024	67.8656	PRTC12	LTILEELR	2	8	Label:13C(6)15N(4)@R	7	8	LTILEELr	6	5789	5796	0.925002	0.934735	0.768726	0.55665	0.678959	0.727109	0.518273	0.148604	62.3769	63.86	-1.48312	15	6	MG132
587.269	26.2323	TNFRSF12A|28_EQAPGTAPCSR_2	21.23	31.23	587.27	587.269	587.269	1434	2	27	1525.04	49695.3	24.5156	30.4871	TNFRSF12A|28	EQAPGTAPCSR	2	9	Carbamidomethyl@C	28	11	EQAPGTAPCSR	6	29908	29918	0.908459	0.917854	0.740159	0.545122	0.955748	0.95987	0.819035	0.467073	25.4173	26.23	-0.812662	15	6	MG132
573.302	67.5684	PRTC13_NGFILDGFPR_2	62.57	72.57	573.303	573.301	573.302	11330	2	27	4125.47	841552	65.7044	71.6744	PRTC13	NGFILDGFPR	2	10	Label:13C(6)15N(4)@R	20	10	NGFILDGFPr	6	21647	21656	0.893003	0.908226	0.725125	0.634106	0.566026	0.599246	0.409066	0.370528	68.7578	67.57	1.18775	15	6	MG132
496.287	29.929	PRTC03_HVLTSIGEK_2	24.93	34.93	496.288	496.286	496.287	3118	2	27	1971.58	249590	28.2278	34.1929	PRTC03	HVLTSIGEK	2	9	Label:13C(6)15N(2)@K	13	9	HVLTSIGEk	2	11563	11571	0.869562	0.870458	0.672354	0.213526	0.926326	0.927325	0.755795	-0.126283	32.8597	29.93	2.92967	15	6	MG132
760.356	53.4877	BAX|66_IGDELDSNMELQR_2	48.49	58.49	760.357	760.356	760.356	7919	2	27	3192.75	337378	51.6272	57.5728	BAX|66	IGDELDSNMELQR	2	NA	NA	44	13	IGDELDSNMELQR	6	51937	51949	0.865799	0.876868	0.680743	0.186713	0.863974	0.875046	0.678338	0.191489	53.2126	53.49	-0.277441	15	6	MG132
761.368	41.0085	FLNA|1502_NADGTQTVNYVPSR_2	36.01	46.01	761.369	761.367	761.368	4863	2	27	2428.85	604848	39.5048	45.4557	FLNA|1502	NADGTQTVNYVPSR	2	NA	NA	60	14	NADGTQTVNYVPSR	5	81286	81299	0.863754	0.874882	0.678123	0.145394	0.8431	0.856827	0.655135	0.193588	40.4809	41.01	-0.529115	15	6	MG132
758.338	44.9663	FBLN1|30_DVLLEACCADGHR_2	39.97	49.97	758.339	758.337	758.338	5613	2	27	2611.71	2229800	43.0794	49.0706	FBLN1|30	DVLLEACCADGHR	2	7;8	Carbamidomethyl@C;Carbamidomethyl@C	53	13	DVLLEACCADGHR	4	67921	67933	0.845348	0.847916	0.644286	-0.113548	0.85031	0.855852	0.653933	-0.113656	43.5284	44.97	-1.44157	15	6	MG132
493.768	26.3416	PRTC01_SSAAPPPPPR_2	21.34	31.34	493.769	493.767	493.768	2147	2	27	1715.11	91144.7	24.8127	30.767	PRTC01	SSAAPPPPPR	2	10	Label:13C(6)15N(4)@R	18	10	SSAAPPPPPr	6	18227	18236	0.832647	0.858246	0.656891	0.451609	0.737315	0.77715	0.566671	0.522909	28.5851	26.34	2.24512	15	6	MG132
471.236	24.3151	ERO1A|24_REEQPPETAAQR_3	19.32	29.32	471.237	471.235	471.236	1121	3	27	1436.43	184720	22.98	28.9508	ERO1A|24	REEQPPETAAQR	3	NA	NA	37	12	REEQPPETAAQR	1	41124	41135	0.828194	0.81346	0.604838	-0.314658	0.827076	0.814501	0.605978	-0.366032	23.9405	24.32	-0.379469	15	6	MG132
867.881	58.2026	HSP90B1|22_DDEVDVDGTVEEDLGK_2	53.2	63.2	867.882	867.88	867.881	8652	2	27	3388.19	751562	56.1366	62.0948	HSP90B1|22	DDEVDVDGTVEEDLGK	2	NA	NA	74	16	DDEVDVDGTVEEDLGK	1	122844	122859	0.81172	0.812577	0.603872	0.564046	0.660557	0.651383	0.451622	-0.19222	56.4699	58.2	-1.73009	15	6	MG132
558.326	56.6711	PRTC09_GLILVGGYGTR_2	51.67	61.67	558.327	558.325	558.326	9481	2	27	3606.72	191301	54.8196	60.7851	PRTC09	GLILVGGYGTR	2	11	Label:13C(6)15N(4)@R	29	11	GLILVGGYGTr	4	33048	33058	0.80459	0.825071	0.61773	0.755816	0.643842	0.6761	0.472662	0.460319	60.1119	56.67	3.44194	15	6	MG132
695.832	45.6162	PRTC06_TASEFDSAIAQDK_2	40.62	50.62	695.833	695.831	695.832	5874	2	27	2674.45	9657761	43.6103	49.5895	PRTC06	TASEFDSAIAQDK	2	13	Label:13C(6)15N(2)@K	43	13	TASEFDSAIAQDk	14	49573	49585	0.786693	0.826993	0.619901	0.60622	0.895649	0.913239	0.732854	0.454733	44.5742	45.62	-1.04578	15	6	MG132
507.602	41.2944	SSBP1|17_RESETTTSLVLER_3	36.29	46.29	507.603	507.601	507.602	5887	3	27	2677.47	846233	39.4168	45.3654	SSBP1|17	RESETTTSLVLER	3	NA	NA	49	13	RESETTTSLVLER	2	62317	62329	0.778984	0.771996	0.561483	-0.239687	0.751776	0.749574	0.539484	-0.190838	44.6245	41.29	3.33447	15	6	MG132
570.276	58.136	PDIA3|26_RDVLELTDDNFESR_3	53.14	63.14	570.277	570.275	570.276	9115	3	27	3512.62	1.01676e+06	56.2421	62.2208	PDIA3|26	RDVLELTDDNFESR	3	NA	NA	65	14	RDVLELTDDNFESR	1	94312	94325	0.775623	0.755985	0.545684	-0.248186	0.777842	0.757788	0.54744	-0.344019	58.5436	58.14	0.403632	15	6	MG132
427.226	43.2527	CALR|18_EPAVYFK_2	38.25	48.25	427.227	427.225	427.226	5084	2	27	2485.81	10211535	41.4302	47.4071	CALR|18	EPAVYFK	2	NA	NA	1	7	EPAVYFK	5	0	6	0.772693	0.808208	0.599125	0.766957	0.784441	0.817569	0.609358	0.786087	41.4302	43.25	-1.81976	15	6	MG132
613.317	30.6463	PRTC02_GISNEGQNASIK_2	25.65	35.65	613.318	613.316	613.317	2648	2	27	1844.39	408849	29.0988	35.0568	PRTC02	GISNEGQNASIK	2	12	Label:13C(6)15N(2)@K	40	12	GISNEGQNASIk	9	45425	45436	0.748807	0.786283	0.575994	0.4642	0.588976	0.638683	0.441041	0.529246	30.7399	30.65	0.089882	15	6	MG132
560.276	37.7312	FLNA|1502_RDADGTQTVNYVPSR_3	32.73	42.73	560.277	560.275	560.276	4809	3	27	2415.08	1.27975e+06	36.0463	42.0111	FLNA|1502	RDADGTQTVNYVPSR	3	NA	NA	70	15	RDADGTQTVNYVPSR	1	111491	111505	0.746026	0.728267	0.519348	-0.376282	0.740547	0.726224	0.517453	-0.290123	40.2513	37.73	2.52126	15	6	MG132
422.736	38.5693	PRTC05_IGDYAGIK_2	33.57	43.57	422.737	422.735	422.736	4263	2	27	2272.38	13327072	36.7808	42.7011	PRTC05	IGDYAGIK	2	8	Label:13C(6)15N(2)@K	6	8	IGDYAGIk	8	4697	4704	0.744737	0.781981	0.571582	0.635194	0.203957	0.336565	0.21853	0.423372	37.873	38.57	-0.697032	15	6	MG132
415.74	33.151	MTHFD2|36_EAVVISGR_2	28.15	38.15	415.741	415.739	415.74	2877	2	27	1906.33	92143.8	31.1589	37.1194	MTHFD2|36	EAVVISGR	2	NA	NA	4	8	EAVVISGR	2	3395	3402	0.7142	0.728734	0.519782	0.0366721	0.713083	0.727908	0.519014	0.0366721	31.7721	33.15	-1.37789	15	6	MG132
586.8	46.4127	PRTC07_SAAGAFGPELSR_2	41.41	51.41	586.801	586.799	586.8	6500	2	27	2825.17	721646	44.6143	50.5954	PRTC07	SAAGAFGPELSR	2	12	Label:13C(6)15N(4)@R	32	12	SAAGAFGPELSr	13	33941	33952	0.694212	0.739601	0.529971	0.617266	0.344697	0.43108	0.283735	0.428118	47.0861	46.41	0.676144	15	6	MG132
818.891	39.83	ENG|26_ETVHCDLQPVGPER_2	34.83	44.83	818.892	818.89	818.891	4481	2	27	2328.19	132586	38.0161	43.982	ENG|26	ETVHCDLQPVGPER	2	5	Carbamidomethyl@C	58	14	ETVHCDLQPVGPER	3	79037	79050	0.687083	0.700223	0.493832	-0.151883	0.578217	0.603903	0.412777	-0.147614	38.8031	39.83	-1.02691	15	6	MG132
752.854	54.3255	HSP90B1|24_EVDVDGTVEEDLGK_2	49.33	59.33	752.855	752.853	752.854	8858	2	27	3443.11	2223956	52.3816	58.3353	HSP90B1|24	EVDVDGTVEEDLGK	2	NA	NA	57	14	EVDVDGTVEEDLGK	2	78283	78296	0.679062	0.682865	0.478532	0.0606164	0.645867	0.648417	0.449137	-0.0637326	57.3851	54.33	3.05508	15	6	MG132
598.297	34.4875	ENG|26_RETVHCDLQPVGPER_3	29.49	39.49	598.298	598.296	598.297	4426	3	27	2313.9	44551.1	32.5871	38.565	ENG|26	RETVHCDLQPVGPER	3	6	Carbamidomethyl@C	69	15	RETVHCDLQPVGPER	1	109685	109699	0.658215	0.656949	0.456306	-0.380041	0.388411	0.407016	0.266861	-0.419549	38.565	34.49	4.07496	15	6	MG132
554.272	47.8065	HSP90B1|24_REVDVDGTVEEDLGK_3	42.81	52.81	554.273	554.271	554.272	7225	3	27	3013.01	1.1318e+06	45.7786	51.7527	HSP90B1|24	REVDVDGTVEEDLGK	3	NA	NA	68	15	REVDVDGTVEEDLGK	2	106633	106647	0.65705	0.658496	0.457614	0.00126451	0.637107	0.638812	0.441148	-0.154751	50.2169	47.81	2.40686	15	6	MG132
594.299	39.5989	FKBP11|26_EAGLETESPVR_2	34.6	44.6	594.3	594.298	594.299	5333	2	27	2543.96	2.01029e+06	37.7397	43.7004	FKBP11|26	EAGLETESPVR	2	NA	NA	26	11	EAGLETESPVR	2	27118	27128	0.611818	0.631678	0.435267	0.0535647	0.599849	0.621356	0.426836	0.0393058	42.3993	39.6	2.79933	15	6	MG132
681.355	58.8019	LSM3|7_REQQTTNTVEEPLDLIR_3	53.8	63.8	681.356	681.354	681.355	9541	3	27	3622.58	6215938	56.8458	62.8255	LSM3|7	REQQTTNTVEEPLDLIR	3	NA	NA	78	17	REQQTTNTVEEPLDLIR	1	132536	132552	0.610216	0.603986	0.412844	-0.395627	0.606248	0.602154	0.411381	-0.358997	60.3763	58.8	1.57627	15	6	MG132
329.53	27.6908	MTHFD2|36_REAVVISGR_3	22.69	32.69	329.531	329.529	329.53	2015	3	27	1680.38	264847	25.64	31.6126	MTHFD2|36	REAVVISGR	3	NA	NA	10	9	REAVVISGR	1	8435	8443	0.550791	0.564065	0.381527	-0.218292	0.543374	0.557813	0.376719	-0.137463	28.0063	27.69	0.31625	15	6	MG132
607.616	43.539	TMEM59|36_REAFDSVLGDTASCHR_3	38.54	48.54	607.617	607.615	607.616	5708	3	27	2633.94	1.86206e+06	41.463	47.436	TMEM59|36	REAFDSVLGDTASCHR	3	14	Carbamidomethyl@C	75	16	REAFDSVLGDTASCHR	1	126354	126369	0.539677	0.538925	0.362339	-0.439817	0.532765	0.534776	0.359208	-0.403807	43.8989	43.54	0.358945	15	6	MG132
776.86	67.1829	PDIA3|26_DVLELTDDNFESR_2	62.18	72.18	776.861	776.859	776.86	10641	2	27	3933.44	2.45745e+06	65.2756	71.2687	PDIA3|26	DVLELTDDNFESR	2	NA	NA	52	13	DVLELTDDNFESR	2	65065	65077	0.522886	0.546374	0.367985	0.0186713	0.544311	0.564856	0.382137	-0.103181	65.5573	67.18	-1.62271	15	6	MG132
628.299	27.7828	ERO1A|24_EEQPPETAAQR_2	22.78	32.78	628.3	628.298	628.299	1849	2	27	1636.11	131992	25.9725	31.9376	ERO1A|24	EEQPPETAAQR	2	NA	NA	22	11	EEQPPETAAQR	1	22908	22918	0.515714	0.532789	0.357712	-0.0678236	0.824734	0.817741	0.609548	-0.202439	27.2686	27.78	-0.511434	15	6	MG132
448.569	33.1905	FKBP11|26_REAGLETESPVR_3	28.19	38.19	448.57	448.568	448.569	2881	3	27	1907.26	511550	30.9999	36.9816	FKBP11|26	REAGLETESPVR	3	NA	NA	39	12	REAGLETESPVR	1	43324	43335	0.422282	0.440893	0.290676	-0.326779	0.414267	0.434347	0.286042	-0.320719	31.7877	33.19	-1.40231	15	6	MG132
584.304	60.3621	P4HA3|29_DTFSALTSVAR_2	55.36	65.36	584.305	584.303	584.304	9801	2	27	3691.99	879379	58.3934	64.3516	P4HA3|29	DTFSALTSVAR	2	NA	NA	27	11	DTFSALTSVAR	1	28358	28368	0.41051	0.433833	0.285679	-0.148687	0.423534	0.445605	0.294023	-0.209756	61.5332	60.36	1.17317	15	6	MG132
337.187	35.4809	CALR|18_REPAVYFK_3	30.48	40.48	337.188	337.186	337.187	4167	3	27	2247.62	1.64211e+06	32.848	38.8223	CALR|18	REPAVYFK	3	NA	NA	3	8	REPAVYFK	2	2989	2996	0.38751	0.453433	0.299602	-0.232348	0.360756	0.429607	0.282696	-0.00875759	37.4603	35.48	1.98032	15	6	MG132
557.299	44.2714	PLA2R1|21_EGVAAALTPER_2	39.27	49.27	557.3	557.298	557.299	6774	2	27	2896.09	1.73098e+06	42.352	48.327	PLA2R1|21	EGVAAALTPER	2	NA	NA	23	11	EGVAAALTPER	2	25718	25728	0.38689	0.436586	0.287625	-0.0633209	0.389909	0.43915	0.289441	-0.13152	48.2682	44.27	3.99821	15	6	MG132
605.827	72.7819	BCL2|130_FATVVEELFR_2	67.78	77.78	605.828	605.826	605.827	11780	2	27	4245.16	5125156	70.7527	76.7194	BCL2|130	FATVVEELFR	2	NA	NA	16	10	FATVVEELFR	1	14726	14735	0.371617	0.402204	0.263512	-0.281853	0.330131	0.365673	0.238323	-0.22278	70.7527	72.78	-2.02733	15	6	MG132
557.928	36.8535	FBLN1|30_RDVLLEACCADGHR_3	31.85	41.85	557.929	557.927	557.928	3879	3	27	2170.67	1.08612e+06	34.9136	40.8846	FBLN1|30	RDVLLEACCADGHR	3	8;9	Carbamidomethyl@C;Carbamidomethyl@C	64	14	RDVLLEACCADGHR	1	91439	91452	0.340898	0.361777	0.23566	-0.516136	0.373044	0.390944	0.255702	-0.507428	36.1778	36.85	-0.672191	15	6	MG132
496.295	48.7357	ERN1|280_LTPTLYVGK_2	43.74	53.74	496.296	496.294	496.295	6647	2	27	2862.37	684095	46.9813	52.9459	ERN1|280	LTPTLYVGK	2	NA	NA	14	9	LTPTLYVGK	2	11995	12003	0.281499	0.349746	0.227464	-0.0976906	0.509602	0.5473	0.368688	-0.00513196	47.7061	48.74	-1.03386	15	6	MG132
794.019	50.9195	EIF4B|46_RDLEGDVSTTWHSNDDDVYR_3	45.92	55.92	794.02	794.018	794.019	7546	3	27	3096.6	1.00438e+06	48.9308	54.882	EIF4B|46	RDLEGDVSTTWHSNDDDVYR	3	NA	NA	83	20	RDLEGDVSTTWHSNDDDVYR	2	138866	138885	0.276013	0.314018	0.203351	-0.0900615	0.304473	0.339618	0.220596	-0.201217	51.61	50.92	0.690029	15	6	MG132
630.957	51.6242	HSP90B1|22_RDDEVDVDGTVEEDLGK_3	46.62	56.62	630.958	630.956	630.957	7156	3	27	2994.81	3.22129e+06	49.883	55.8542	HSP90B1|22	RDDEVDVDGTVEEDLGK	3	NA	NA	77	17	RDDEVDVDGTVEEDLGK	2	127720	127736	0.242151	0.281818	0.181875	-0.186676	0.248256	0.289173	0.18676	-0.281479	49.9135	51.62	-1.70651	15	6	MG132
576.587	27.2043	IGFBP4|22_RDEAIHCPPCSEEK_3	22.2	32.2	576.588	576.586	576.587	2767	3	27	1876.05	1.59386e+06	25.3479	31.3086	IGFBP4|22	RDEAIHCPPCSEEK	3	7;10	Carbamidomethyl@C;Carbamidomethyl@C	62	14	RDEAIHCPPCSEEK	1	87227	87240	0.217726	0.25228	0.162361	-0.0335524	0.245078	0.277312	0.178887	-0.256894	31.2676	27.2	4.06757	15	6	MG132
364.519	25.9378	CENPU|49_RDSDVSSIGR_3	20.94	30.94	364.521	364.519	364.519	1240	3	27	1471.86	636994	24.1747	30.1331	CENPU|49	RDSDVSSIGR	3	NA	NA	19	10	RDSDVSSIGR	1	18902	18911	0.2163	0.259267	0.166962	-0.22278	0.211862	0.254933	0.164107	-0.213771	24.5309	25.94	-1.40907	15	6	MG132
832.87	52.702	TMEM59|36_EAFDSVLGDTASCHR_2	47.7	57.7	832.871	832.869	832.87	7951	2	27	3201.26	1.7976e+06	51.0551	57.0125	TMEM59|36	EAFDSVLGDTASCHR	2	13	Carbamidomethyl@C	66	15	EAFDSVLGDTASCHR	1	96707	96721	0.177283	0.211888	0.135923	-0.3838	0.186391	0.219799	0.14108	-0.297642	53.3544	52.7	0.654384	15	6	MG132
443.882	22.4798	TNFRSF12A|28_REQAPGTAPCSR_3	17.48	27.48	443.884	443.882	443.883	1126	3	27	1437.95	542154	21.4121	27.3753	TNFRSF12A|28	REQAPGTAPCSR	3	10	Carbamidomethyl@C	33	12	REQAPGTAPCSR	1	36977	36988	0.149599	0.194427	0.12457	-0.33284	0.181997	0.224736	0.144304	-0.326779	23.9658	22.48	1.48582	15	6	MG132
542.269	42.9302	CASP3|29_SGISLDNSYK_2	37.93	47.93	542.27	542.269	542.269	5386	2	27	2556.77	1.2973e+06	41.2161	47.1724	CASP3|29	SGISLDNSYK	2	NA	NA	15	10	SGISLDNSYK	2	13709	13718	0.145756	0.220606	0.141607	-0.0621622	0.147667	0.222667	0.142952	-0.0528958	42.6128	42.93	-0.317199	15	6	MG132
520.925	34.7462	CPSF7|33_RDVLTATSQPSDDR_3	29.75	39.75	520.926	520.924	520.925	3910	3	27	2178.79	1.83378e+06	32.5832	38.5574	CPSF7|33	RDVLTATSQPSDDR	3	NA	NA	61	14	RDVLTATSQPSDDR	1	84224	84237	0.128744	0.169961	0.108728	-0.361436	0.122854	0.163468	0.104536	-0.314949	36.3131	34.75	1.56314	15	6	MG132
559.957	43.3358	P4HB|18_RDAPEEEDHVLVLR_3	38.34	48.34	559.958	559.956	559.957	5526	3	27	2590.17	6798099	41.3015	47.2385	P4HB|18	RDAPEEEDHVLVLR	3	NA	NA	55	14	RDAPEEEDHVLVLR	1	72394	72407	0.0711127	0.126404	0.0806874	-0.533552	0.0884607	0.138609	0.088526	-0.493298	43.1695	43.34	-0.170493	15	6	MG132
702.834	41.5014	CPSF7|33_DVLTATSQPSDDR_2	36.5	46.5	702.835	702.833	702.834	5930	2	27	2687.34	1.22267e+06	39.7132	45.6699	CPSF7|33	DVLTATSQPSDDR	2	NA	NA	46	13	DVLTATSQPSDDR	1	57601	57613	0.0684206	0.12287	0.0784196	-0.0504234	0.0548874	0.111019	0.0708226	-0.238765	44.7891	41.5	3.28907	15	6	MG132
467.733	29.7107	CENPU|49_NSDVSSIGR_2	24.71	34.71	467.734	467.732	467.733	1984	2	27	1671.96	73544.1	27.866	33.8348	CENPU|49	NSDVSSIGR	2	NA	NA	11	9	NSDVSSIGR	0	9203	9211	0	0	0	-0.383065	0	0	0	-0.456378	27.866	29.71	-1.84397	15	6	MG132
786.327	31.4927	IGFBP4|22_DEAIHCPPCSEEK_2	26.49	36.49	786.328	786.326	786.327	2392	2	27	1778.07	109088	29.6344	35.625	IGFBP4|22	DEAIHCPPCSEEK	2	6;9	Carbamidomethyl@C;Carbamidomethyl@C	54	13	DEAIHCPPCSEEK	0	69793	69805	0	0	0	0.0935193	0	0	0	-0.317846	29.6344	31.49	-1.85558	15	6	MG132
806.875	19.0125	SHMT2|27_QHSNAAQTQTGEANR_2	14.01	24.01	806.876	806.874	806.875	106	2	27	1111.38	22167.9	18.523	24.5018	SHMT2|27	QHSNAAQTQTGEANR	2	NA	NA	67	15	QHSNAAQTQTGEANR	0	98415	98429	0	0	0	0.434211	0	0	0	-0.346719	18.523	19.01	-0.487048	15	6	MG132
590.614	17.8991	SHMT2|27_REHSNAAQTQTGEANR_3	12.9	22.9	590.615	590.613	590.614	1	3	27	1067.12	17316.3	17.7853	23.7785	SHMT2|27	REHSNAAQTQTGEANR	3	NA	NA	73	16	REHSNAAQTQTGEANR	0	115089	115104	0	0	0	-0.0196999	0	0	0	-0.500528	17.7853	17.9	-0.114658	15	6	MG132
848.393	68.08	UQCRHL|15_RDPEEEEEEEEELVDPLTTVR_3	63.08	73.08	848.394	848.392	848.393	10858	3	27	3995.95	436066	66.5992	72.5708	UQCRHL|15	RDPEEEEEEEEELVDPLTTVR	3	NA	NA	84	21	RDPEEEEEEEEELVDPLTTVR	0	140785	140805	0	0	0	0.238514	0	0	0	-0.429372	66.5992	68.08	-1.48076	15	6	MG132
745.392	59.9233	PRTC11_SFANQPLEVVYSK_2	54.92	64.92	745.393	745.391	745.392	9268	2	27	3541.86	28430888	57.9666	63.9439	PRTC11	SFANQPLEVVYSK	2	13	Label:13C(6)15N(2)@K	45	13	SFANQPLEVVYSk	16	54317	54329	0.986485	0.9886	0.903782	0.859314	0.967934	0.972908	0.851475	0.731057	59.031	59.92	-0.888952	16	6	MG132
836.415	69.2789	SQSTM1|421_NYDIGAALDTIQYSK_2	64.28	74.28	836.416	836.414	836.415	11577	2	27	4187.4	17211830	67.4574	73.4404	SQSTM1|421	NYDIGAALDTIQYSK	2	NA	NA	71	15	NYDIGAALDTIQYSK	17	113601	113615	0.98554	0.987667	0.899913	0.874812	0.982583	0.985124	0.890055	0.863465	69.79	69.28	0.509958	16	6	MG132
773.895	53.205	PRTC08_ELGQSGVDTYLQTK_2	48.21	58.21	773.896	773.894	773.895	7830	2	27	3157.76	19271646	51.4055	57.3917	PRTC08	ELGQSGVDTYLQTK	2	14	Label:13C(6)15N(2)@K	56	14	ELGQSGVDTYLQTk	13	74371	74384	0.985149	0.98763	0.899764	0.803381	0.910571	0.926041	0.75362	0.851063	52.6294	53.21	-0.580592	16	6	MG132
787.421	72.8278	PRTC15_LSSEAPALFQFDLK_2	67.83	77.83	787.422	787.42	787.421	12329	2	27	4386.48	5.10079e+06	70.86	76.8539	PRTC15	LSSEAPALFQFDLK	2	14	Label:13C(6)15N(2)@K	63	14	LSSEAPALFQFDLk	7	88437	88450	0.958715	0.959147	0.817403	0.329548	0.91916	0.919532	0.742864	0.387604	73.1081	72.83	0.278061	16	6	MG132
682.849	48.3756	SSBP1|17_ESETTTSLVLER_2	43.38	53.38	682.85	682.848	682.849	6598	2	27	2837.31	4172119	46.6656	52.6565	SSBP1|17	ESETTTSLVLER	2	NA	NA	34	12	ESETTTSLVLER	11	38808	38819	0.951147	0.959161	0.817434	0.81938	0.943626	0.953219	0.804504	0.81938	47.2885	48.38	-1.09146	16	6	MG132
761.381	51.6026	P4HB|18_DAPEEEDHVLVLR_2	46.6	56.6	761.382	761.38	761.381	7213	2	27	2996.87	296043	49.7193	55.6762	P4HB|18	DAPEEEDHVLVLR	2	NA	NA	51	13	DAPEEEDHVLVLR	1	62885	62897	0.941526	0.926861	0.755008	-0.253528	0.681959	0.661323	0.46001	-0.518997	49.9478	51.6	-1.65221	16	6	MG132
451.283	34.9206	PRTC04_DIPVPKPK_2	29.92	39.92	451.284	451.282	451.283	3690	2	27	2111.37	6818608	33.3879	39.3482	PRTC04	DIPVPKPK	2	8	Label:13C(6)15N(2)@K	2	8	DIPVPKPk	10	1217	1224	0.938534	0.946744	0.791298	0.651888	0.941748	0.949477	0.796771	0.67214	35.1895	34.92	0.269524	16	6	MG132
801.411	60.0386	PRTC10_GILFVGSGVSGGEEGAR_2	55.04	65.04	801.412	801.41	801.411	9592	2	27	3627.23	467505	58.2981	64.282	PRTC10	GILFVGSGVSGGEEGAR	2	17	Label:13C(6)15N(4)@R	79	17	GILFVGSGVSGGEEGAr	11	134964	134980	0.92945	0.936965	0.772756	0.736905	0.657844	0.694716	0.48894	0.488668	60.4538	60.04	0.413834	16	6	MG132
680.374	71.767	PRTC14_ELASGLSFPVGFK_2	66.77	76.77	680.375	680.372	680.373	12032	2	27	4308.25	3791434	69.6945	75.6639	PRTC14	ELASGLSFPVGFK	2	13	Label:13C(6)15N(2)@K	48	13	ELASGLSFPVGFk	12	58925	58937	0.926098	0.936994	0.772807	0.704787	0.834847	0.859685	0.65868	0.747666	71.8041	71.77	0.034127	16	6	MG132
764.835	69.703	ATF4|76_EDAFSGTDWMLEK_2	64.7	74.7	764.836	764.834	764.835	11505	2	27	4168.35	400763	67.7864	73.7727	ATF4|76	EDAFSGTDWMLEK	2	NA	NA	42	13	EDAFSGTDWMLEK	5	47801	47813	0.925828	0.928699	0.758144	0.349436	0.903843	0.908326	0.725278	0.349327	69.4725	69.7	-0.227542	16	6	MG132
587.269	26.2323	TNFRSF12A|28_EQAPGTAPCSR_2	21.23	31.23	587.27	587.269	587.269	1495	2	27	1541.9	359310	24.5212	30.4805	TNFRSF12A|28	EQAPGTAPCSR	2	9	Carbamidomethyl@C	28	11	EQAPGTAPCSR	6	30181	30191	0.925639	0.933363	0.766282	0.540431	0.927329	0.935766	0.77058	0.460131	25.6984	26.23	-0.531588	16	6	MG132
415.74	33.151	MTHFD2|36_EAVVISGR_2	28.15	38.15	415.741	415.739	415.74	2950	2	27	1916.22	184418	31.1557	37.0959	MTHFD2|36	EAVVISGR	2	NA	NA	4	8	EAVVISGR	5	3443	3450	0.917116	0.927184	0.755555	0.500274	0.920676	0.930241	0.760805	0.500274	31.937	33.15	-1.21297	16	6	MG132
498.802	63.8572	PRTC12_LTILEELR_2	58.86	68.86	498.803	498.801	498.802	10483	2	27	3875.08	99182.8	61.8972	67.8735	PRTC12	LTILEELR	2	8	Label:13C(6)15N(4)@R	7	8	LTILEELr	6	6551	6558	0.910775	0.92481	0.751552	0.554461	0.52046	0.594105	0.404988	0.108101	64.5847	63.86	0.724712	16	6	MG132
760.356	53.4877	BAX|66_IGDELDSNMELQR_2	48.49	58.49	760.357	760.356	760.356	7986	2	27	3198.38	362165	51.6074	57.585	BAX|66	IGDELDSNMELQR	2	NA	NA	44	13	IGDELDSNMELQR	8	52241	52253	0.904203	0.914807	0.735314	0.339286	0.895261	0.907132	0.723466	0.330493	53.3064	53.49	-0.183617	16	6	MG132
573.302	67.5684	PRTC13_NGFILDGFPR_2	62.57	72.57	573.303	573.301	573.302	10978	2	27	4023.52	1.02028e+06	65.7107	71.6714	PRTC13	NGFILDGFPR	2	10	Label:13C(6)15N(4)@R	20	10	NGFILDGFPr	5	21223	21232	0.882713	0.898467	0.710636	0.750193	0.518516	0.555828	0.375197	0.501287	67.0586	67.57	-0.511354	16	6	MG132
496.287	29.929	PRTC03_HVLTSIGEK_2	24.93	34.93	496.288	496.286	496.287	3173	2	27	1975.57	366077	28.2554	34.1905	PRTC03	HVLTSIGEK	2	9	Label:13C(6)15N(2)@K	13	9	HVLTSIGEk	2	11641	11649	0.863389	0.863174	0.663054	0.213526	0.941209	0.939949	0.778255	-0.126283	32.9262	29.93	2.99615	16	6	MG132
594.299	39.5989	FKBP11|26_EAGLETESPVR_2	34.6	44.6	594.3	594.298	594.299	4728	2	27	2383.99	271172	37.758	43.7232	FKBP11|26	EAGLETESPVR	2	NA	NA	26	11	EAGLETESPVR	2	26571	26581	0.839352	0.836708	0.631046	0.0747654	0.850094	0.847118	0.643329	0.0747654	39.7332	39.6	0.133176	16	6	MG132
471.236	24.3151	ERO1A|24_REEQPPETAAQR_3	19.32	29.32	471.237	471.235	471.236	1199	3	27	1459.58	526722	22.9804	28.9749	ERO1A|24	REEQPPETAAQR	3	NA	NA	37	12	REEQPPETAAQR	1	41602	41613	0.828194	0.81346	0.604838	-0.314658	0.827076	0.814501	0.605978	-0.366032	24.3264	24.32	0.006397	16	6	MG132
761.368	41.0085	FLNA|1502_NADGTQTVNYVPSR_2	36.01	46.01	761.369	761.367	761.368	4916	2	27	2433.13	518384	39.4932	45.4701	FLNA|1502	NADGTQTVNYVPSR	2	NA	NA	60	14	NADGTQTVNYVPSR	3	81508	81521	0.804505	0.810915	0.60206	-0.0516093	0.790153	0.798267	0.588499	-0.0035857	40.5521	41.01	-0.457876	16	6	MG132
559.957	43.3358	P4HB|18_RDAPEEEDHVLVLR_3	38.34	48.34	559.958	559.956	559.957	5236	3	27	2511.54	893342	41.2977	47.2576	P4HB|18	RDAPEEEDHVLVLR	3	NA	NA	55	14	RDAPEEEDHVLVLR	4	72187	72200	0.799701	0.806241	0.597003	-0.228379	0.867289	0.868938	0.670394	-0.176001	41.8591	43.34	-1.48093	16	6	MG132
758.338	44.9663	FBLN1|30_DVLLEACCADGHR_2	39.97	49.97	758.339	758.337	758.338	5659	2	27	2612.91	1.98864e+06	43.0956	49.0627	FBLN1|30	DVLLEACCADGHR	2	7;8	Carbamidomethyl@C;Carbamidomethyl@C	53	13	DVLLEACCADGHR	5	68105	68117	0.788316	0.80564	0.596357	-0.0504234	0.79316	0.811916	0.603151	-0.0458641	43.5486	44.97	-1.42145	16	6	MG132
695.832	45.6162	PRTC06_TASEFDSAIAQDK_2	40.62	50.62	695.833	695.831	695.832	5963	2	27	2686.1	3823341	43.6324	49.5808	PRTC06	TASEFDSAIAQDK	2	13	Label:13C(6)15N(2)@K	43	13	TASEFDSAIAQDk	12	49889	49901	0.787755	0.828488	0.621597	0.73502	0.877778	0.898552	0.710759	0.584184	44.7683	45.62	-0.851745	16	6	MG132
558.326	56.6711	PRTC09_GLILVGGYGTR_2	51.67	61.67	558.327	558.325	558.326	9243	2	27	3536.01	621637	54.8074	60.7867	PRTC09	GLILVGGYGTR	2	11	Label:13C(6)15N(4)@R	29	11	GLILVGGYGTr	3	32911	32921	0.787364	0.804701	0.595349	0.640994	0.652559	0.67997	0.476014	0.352251	58.9335	56.67	2.26347	16	6	MG132
507.602	41.2944	SSBP1|17_RESETTTSLVLER_3	36.29	46.29	507.603	507.601	507.602	5976	3	27	2689.11	1.7298e+06	39.4062	45.3816	SSBP1|17	RESETTTSLVLER	3	NA	NA	49	13	RESETTTSLVLER	2	62621	62633	0.781025	0.774269	0.563765	-0.239687	0.754061	0.752063	0.541883	-0.190838	44.8185	41.29	3.52852	16	6	MG132
628.299	27.7828	ERO1A|24_EEQPPETAAQR_2	22.78	32.78	628.3	628.298	628.299	1922	2	27	1650.88	342988	25.9775	31.9487	ERO1A|24	EEQPPETAAQR	2	NA	NA	22	11	EEQPPETAAQR	1	23141	23151	0.771394	0.770736	0.560223	-0.0605066	0.3369	0.367062	0.239273	-0.217073	27.5147	27.78	-0.265287	16	6	MG132
818.891	39.83	ENG|26_ETVHCDLQPVGPER_2	34.83	44.83	818.892	818.89	818.891	4530	2	27	2330.1	51473.7	37.9968	43.9595	ENG|26	ETVHCDLQPVGPER	2	5	Carbamidomethyl@C	58	14	ETVHCDLQPVGPER	3	79259	79272	0.763108	0.771067	0.560554	-0.138991	0.679014	0.696564	0.490578	-0.147443	38.835	39.83	-0.995018	16	6	MG132
493.768	26.3416	PRTC01_SSAAPPPPPR_2	21.34	31.34	493.769	493.767	493.768	2121	2	27	1702.69	827111	24.8115	30.7949	PRTC01	SSAAPPPPPR	2	10	Label:13C(6)15N(4)@R	18	10	SSAAPPPPPr	7	18298	18307	0.760516	0.796685	0.58683	0.233977	0.494458	0.569783	0.385946	-0.110682	28.3781	26.34	2.03813	16	6	MG132
613.317	30.6463	PRTC02_GISNEGQNASIK_2	25.65	35.65	613.318	613.316	613.317	2654	2	27	1837.56	1.17592e+06	29.083	35.0274	PRTC02	GISNEGQNASIK	2	12	Label:13C(6)15N(2)@K	40	12	GISNEGQNASIk	10	45672	45683	0.746308	0.78864	0.578429	0.531572	0.539239	0.597955	0.40804	0.447498	30.6261	30.65	-0.023934	16	6	MG132
422.736	38.5693	PRTC05_IGDYAGIK_2	33.57	43.57	422.737	422.735	422.736	4321	2	27	2277.34	4.94804e+06	36.7585	42.7145	PRTC05	IGDYAGIK	2	8	Label:13C(6)15N(2)@K	6	8	IGDYAGIk	7	4731	4738	0.74504	0.778878	0.568421	0.547072	0.188148	0.317732	0.205843	0.531199	37.9557	38.57	-0.614314	16	6	MG132
752.854	54.3255	HSP90B1|24_EVDVDGTVEEDLGK_2	49.33	59.33	752.855	752.853	752.854	8842	2	27	3428.72	2.06652e+06	52.3735	58.3524	HSP90B1|24	EVDVDGTVEEDLGK	2	NA	NA	57	14	EVDVDGTVEEDLGK	3	78375	78388	0.744562	0.7554	0.545115	0.171903	0.667003	0.683665	0.47923	0.0391873	57.1454	54.33	2.81539	16	6	MG132
586.8	46.4127	PRTC07_SAAGAFGPELSR_2	41.41	51.41	586.801	586.799	586.8	6544	2	27	2823.66	3708010	44.6384	50.5741	PRTC07	SAAGAFGPELSR	2	12	Label:13C(6)15N(4)@R	32	12	SAAGAFGPELSr	11	34144	34155	0.691419	0.733776	0.524488	0.491473	0.344988	0.426832	0.280741	0.250458	47.0609	46.41	0.650949	16	6	MG132
554.272	47.8065	HSP90B1|24_REVDVDGTVEEDLGK_3	42.81	52.81	554.273	554.271	554.272	7319	3	27	3024.45	1.14142e+06	45.7902	51.7397	HSP90B1|24	REVDVDGTVEEDLGK	3	NA	NA	68	15	REVDVDGTVEEDLGK	2	106965	106979	0.657434	0.659456	0.458427	0.00126451	0.638015	0.640276	0.44236	-0.154751	50.4074	47.81	2.59744	16	6	MG132
794.019	50.9195	EIF4B|46_RDLEGDVSTTWHSNDDDVYR_3	45.92	55.92	794.02	794.018	794.019	7279	3	27	3013.95	660012	48.9194	54.9047	EIF4B|46	RDLEGDVSTTWHSNDDDVYR	3	NA	NA	83	20	RDLEGDVSTTWHSNDDDVYR	1	138132	138151	0.653543	0.641649	0.443499	-0.146548	0.676157	0.663304	0.461693	-0.261777	50.2325	50.92	-0.687479	16	6	MG132
832.87	52.702	TMEM59|36_EAFDSVLGDTASCHR_2	47.7	57.7	832.871	832.869	832.87	8768	2	27	3408.96	101112	51.065	57.0253	TMEM59|36	EAFDSVLGDTASCHR	2	13	Carbamidomethyl@C	66	15	EAFDSVLGDTASCHR	1	98537	98551	0.626902	0.627941	0.432204	-0.380041	0.618022	0.620522	0.426158	-0.293882	56.816	52.7	4.11604	16	6	MG132
560.276	37.7312	FLNA|1502_RDADGTQTVNYVPSR_3	32.73	42.73	560.277	560.275	560.276	4663	3	27	2366.7	793719	36.0646	41.9972	FLNA|1502	RDADGTQTVNYVPSR	3	NA	NA	70	15	RDADGTQTVNYVPSR	2	111389	111403	0.616063	0.627402	0.431764	-0.339371	0.608532	0.621899	0.427277	-0.245831	39.445	37.73	1.71504	16	6	MG132
681.355	58.8019	LSM3|7_REQQTTNTVEEPLDLIR_3	53.8	63.8	681.356	681.354	681.355	8831	3	27	3425.71	264975	56.8567	62.826	LSM3|7	REQQTTNTVEEPLDLIR	3	NA	NA	78	17	REQQTTNTVEEPLDLIR	1	131060	131076	0.610217	0.603987	0.412844	-0.392743	0.635049	0.628423	0.432599	-0.356113	57.0951	58.8	-1.7049	16	6	MG132
427.226	43.2527	CALR|18_EPAVYFK_2	38.25	48.25	427.227	427.225	427.226	5120	2	27	2485.89	9280140	41.4315	47.3913	CALR|18	EPAVYFK	2	NA	NA	1	7	EPAVYFK	5	0	6	0.572728	0.631287	0.434946	0.415652	0.568874	0.626927	0.431375	0.435652	41.4315	43.25	-1.8185	16	6	MG132
329.53	27.6908	MTHFD2|36_REAVVISGR_3	22.69	32.69	329.531	329.529	329.53	1763	3	27	1610.99	274513	25.6223	31.5916	MTHFD2|36	REAVVISGR	3	NA	NA	10	9	REAVVISGR	1	8177	8185	0.550791	0.564065	0.381527	-0.218292	0.543374	0.557813	0.376719	-0.137463	26.8498	27.69	-0.840173	16	6	MG132
607.616	43.539	TMEM59|36_REAFDSVLGDTASCHR_3	38.54	48.54	607.617	607.615	607.616	5353	3	27	2539.1	9339592	41.4672	47.4226	TMEM59|36	REAFDSVLGDTASCHR	3	14	Carbamidomethyl@C	75	16	REAFDSVLGDTASCHR	1	126019	126034	0.539677	0.538925	0.362339	-0.439817	0.532765	0.534776	0.359208	-0.403807	42.3184	43.54	-1.22163	16	6	MG132
702.834	41.5014	CPSF7|33_DVLTATSQPSDDR_2	36.5	46.5	702.835	702.833	702.834	5298	2	27	2526.07	4.57307e+06	39.7022	45.679	CPSF7|33	DVLTATSQPSDDR	2	NA	NA	46	13	DVLTATSQPSDDR	1	57089	57101	0.487203	0.497561	0.331542	-0.0147091	0.488806	0.498812	0.33246	-0.197948	42.1011	41.5	0.601141	16	6	MG132
776.86	67.1829	PDIA3|26_DVLELTDDNFESR_2	62.18	72.18	776.861	776.859	776.86	10616	2	27	3918.53	1.42421e+06	65.2795	71.2527	PDIA3|26	DVLELTDDNFESR	2	NA	NA	52	13	DVLELTDDNFESR	1	65081	65093	0.477893	0.489548	0.325676	-0.0811985	0.516666	0.523393	0.350668	-0.20305	65.3088	67.18	-1.87125	16	6	MG132
557.299	44.2714	PLA2R1|21_EGVAAALTPER_2	39.27	49.27	557.3	557.298	557.299	6270	2	27	2759.08	1.89904e+06	42.3754	48.334	PLA2R1|21	EGVAAALTPER	2	NA	NA	23	11	EGVAAALTPER	1	25251	25261	0.462832	0.47827	0.317472	-0.134053	0.475243	0.489309	0.325502	-0.202439	45.9847	44.27	1.71466	16	6	MG132
443.882	22.4798	TNFRSF12A|28_REQAPGTAPCSR_3	17.48	27.48	443.884	443.882	443.883	1524	3	27	1549.66	1.5146e+06	21.4125	27.3791	TNFRSF12A|28	REQAPGTAPCSR	3	10	Carbamidomethyl@C	33	12	REQAPGTAPCSR	1	38126	38137	0.447592	0.466449	0.308934	-0.320719	0.473567	0.489701	0.325788	-0.320719	25.8277	22.48	3.34768	16	6	MG132
448.569	33.1905	FKBP11|26_REAGLETESPVR_3	28.19	38.19	448.57	448.568	448.569	2940	3	27	1913.4	1.38267e+06	30.9961	36.9581	FKBP11|26	REAGLETESPVR	3	NA	NA	39	12	REAGLETESPVR	1	43626	43637	0.422282	0.440893	0.290676	-0.326779	0.414267	0.434347	0.286042	-0.320719	31.89	33.19	-1.3	16	6	MG132
496.295	48.7357	ERN1|280_LTPTLYVGK_2	43.74	53.74	496.296	496.294	496.295	6700	2	27	2862.94	494000	47.0074	52.9684	ERN1|280	LTPTLYVGK	2	NA	NA	14	9	LTPTLYVGK	3	12057	12065	0.392369	0.466531	0.308993	0.0681818	0.670861	0.702639	0.49599	0.161107	47.7156	48.74	-1.02436	16	6	MG132
605.827	72.7819	BCL2|130_FATVVEELFR_2	67.78	77.78	605.828	605.826	605.827	11823	2	27	4252.76	1.49075e+06	70.733	76.7232	BCL2|130	FATVVEELFR	2	NA	NA	16	10	FATVVEELFR	1	14842	14851	0.371617	0.402204	0.263512	-0.281853	0.330131	0.365673	0.238323	-0.22278	70.8793	72.78	-1.90073	16	6	MG132
570.276	58.136	PDIA3|26_RDVLELTDDNFESR_3	53.14	63.14	570.277	570.275	570.276	9181	3	27	3520.39	948628	56.2483	62.2164	PDIA3|26	RDVLELTDDNFESR	3	NA	NA	65	14	RDVLELTDDNFESR	2	94625	94638	0.352981	0.393693	0.257605	-0.198156	0.324708	0.368494	0.240253	-0.311406	58.6732	58.14	0.533202	16	6	MG132
557.928	36.8535	FBLN1|30_RDVLLEACCADGHR_3	31.85	41.85	557.929	557.927	557.928	3922	3	27	2172.05	669678	34.8877	40.8535	FBLN1|30	RDVLLEACCADGHR	3	8;9	Carbamidomethyl@C;Carbamidomethyl@C	64	14	RDVLLEACCADGHR	1	91739	91752	0.340898	0.361777	0.23566	-0.516136	0.373044	0.390944	0.255702	-0.507428	36.2008	36.85	-0.649209	16	6	MG132
630.957	51.6242	HSP90B1|22_RDDEVDVDGTVEEDLGK_3	46.62	56.62	630.958	630.956	630.957	7229	3	27	3000.83	4.68886e+06	49.8916	55.8545	HSP90B1|22	RDDEVDVDGTVEEDLGK	3	NA	NA	77	17	RDDEVDVDGTVEEDLGK	2	127988	128004	0.283154	0.320169	0.207479	-0.0390569	0.293673	0.331196	0.214904	-0.136699	50.0139	51.62	-1.6061	16	6	MG132
520.925	34.7462	CPSF7|33_RDVLTATSQPSDDR_3	29.75	39.75	520.926	520.924	520.925	3231	3	27	1990.7	464166	32.5836	38.5339	CPSF7|33	RDVLTATSQPSDDR	3	NA	NA	61	14	RDVLTATSQPSDDR	1	83315	83328	0.257801	0.288584	0.186369	-0.348374	0.289306	0.317235	0.205509	-0.301887	33.1784	34.75	-1.57163	16	6	MG132
364.519	25.9378	CENPU|49_RDSDVSSIGR_3	20.94	30.94	364.521	364.519	364.519	1829	3	27	1628.29	2.74037e+06	24.1745	30.1696	CENPU|49	RDSDVSSIGR	3	NA	NA	19	10	RDSDVSSIGR	1	19873	19882	0.2163	0.259267	0.166962	-0.22278	0.211862	0.254933	0.164107	-0.213771	27.1382	25.94	1.19819	16	6	MG132
584.304	60.3621	P4HA3|29_DTFSALTSVAR_2	55.36	65.36	584.305	584.303	584.304	9426	2	27	3583.21	1.62839e+06	58.3795	64.3531	P4HA3|29	DTFSALTSVAR	2	NA	NA	27	11	DTFSALTSVAR	1	28011	28021	0.183759	0.232032	0.149075	-0.163321	0.16262	0.212867	0.13656	-0.231707	59.7202	60.36	-0.639777	16	6	MG132
542.269	42.9302	CASP3|29_SGISLDNSYK_2	37.93	47.93	542.27	542.269	542.269	6460	2	27	2804.07	1.49431e+06	41.2086	47.1915	CASP3|29	SGISLDNSYK	2	NA	NA	15	10	SGISLDNSYK	2	14698	14707	0.161741	0.225256	0.144644	-0.0178893	0.1544	0.218898	0.140492	-0.0268984	46.7345	42.93	3.80453	16	6	MG132
867.881	58.2026	HSP90B1|22_DDEVDVDGTVEEDLGK_2	53.2	63.2	867.882	867.88	867.881	9334	2	27	3558.65	1.45684e+06	56.1154	62.0906	HSP90B1|22	DDEVDVDGTVEEDLGK	2	NA	NA	74	16	DDEVDVDGTVEEDLGK	1	124459	124474	0.127695	0.153635	0.098196	0.550931	0.321209	0.343529	0.223245	-0.202056	59.3108	58.2	1.11082	16	6	MG132
598.297	34.4875	ENG|26_RETVHCDLQPVGPER_3	29.49	39.49	598.298	598.296	598.297	3169	3	27	1974.42	91829.4	32.5875	38.5734	ENG|26	RETVHCDLQPVGPER	3	6	Carbamidomethyl@C	69	15	RETVHCDLQPVGPER	1	107721	107735	0.124971	0.163459	0.10453	-0.3838	0.0922308	0.134543	0.0859133	-0.438346	32.9069	34.49	-1.58307	16	6	MG132
467.733	29.7107	CENPU|49_NSDVSSIGR_2	24.71	34.71	467.734	467.732	467.733	2642	2	27	1834.4	483728	27.8752	33.8301	CENPU|49	NSDVSSIGR	2	NA	NA	11	9	NSDVSSIGR	1	9809	9817	0.0302008	0.107747	0.0687273	-0.286474	0.0241629	0.103136	0.0657757	-0.359787	30.5733	29.71	0.863335	16	6	MG132
576.587	27.2043	IGFBP4|22_RDEAIHCPPCSEEK_3	22.2	32.2	576.588	576.586	576.587	1666	3	27	1586.34	519290	25.344	31.3026	IGFBP4|22	RDEAIHCPPCSEEK	3	7;10	Carbamidomethyl@C;Carbamidomethyl@C	62	14	RDEAIHCPPCSEEK	1	85733	85746	0.00408855	0.0568157	0.0361896	-0.0683855	0.0421201	0.0916337	0.0584178	-0.291727	26.439	27.2	-0.761025	16	6	MG132
337.187	35.4809	CALR|18_REPAVYFK_3	30.48	40.48	337.188	337.186	337.187	3161	3	27	1972.65	214109	32.8775	38.8248	CALR|18	REPAVYFK	3	NA	NA	3	8	REPAVYFK	0	2106	2113	0	0	0	-0.557198	0	0	0	-0.319376	32.8775	35.48	-2.60249	16	6	MG132
786.327	31.4927	IGFBP4|22_DEAIHCPPCSEEK_2	26.49	36.49	786.328	786.326	786.327	2421	2	27	1778.9	164397	29.6483	35.6231	IGFBP4|22	DEAIHCPPCSEEK	2	6;9	Carbamidomethyl@C;Carbamidomethyl@C	54	13	DEAIHCPPCSEEK	0	69977	69989	0	0	0	0.0935193	0	0	0	-0.317846	29.6483	31.49	-1.84167	16	6	MG132
806.875	19.0125	SHMT2|27_QHSNAAQTQTGEANR_2	14.01	24.01	806.876	806.874	806.875	105	2	27	1111.48	17123.3	18.5246	24.5058	SHMT2|27	QHSNAAQTQTGEANR	2	NA	NA	67	15	QHSNAAQTQTGEANR	0	98635	98649	0	0	0	0.434211	0	0	0	-0.346719	18.5246	19.01	-0.485378	16	6	MG132
590.614	17.8991	SHMT2|27_REHSNAAQTQTGEANR_3	12.9	22.9	590.615	590.613	590.614	1	3	27	1067.1	16084.1	17.7849	23.7644	SHMT2|27	REHSNAAQTQTGEANR	3	NA	NA	73	16	REHSNAAQTQTGEANR	0	115309	115324	0	0	0	-0.0196999	0	0	0	-0.500528	17.7849	17.9	-0.115065	16	6	MG132
848.393	68.08	UQCRHL|15_RDPEEEEEEEEELVDPLTTVR_3	63.08	73.08	848.394	848.392	848.393	10896	3	27	4000.68	1.0259e+06	66.5856	72.5661	UQCRHL|15	RDPEEEEEEEEELVDPLTTVR	3	NA	NA	84	21	RDPEEEEEEEEELVDPLTTVR	0	141005	141025	0	0	0	0.238514	0	0	0	-0.429372	66.678	68.08	-1.40198	16	6	MG132
773.895	53.205	PRTC08_ELGQSGVDTYLQTK_2	48.21	58.21	773.896	773.894	773.895	7686	2	27	3160.14	13399936	51.4132	57.4014	PRTC08	ELGQSGVDTYLQTK	2	14	Label:13C(6)15N(2)@K	56	14	ELGQSGVDTYLQTk	13	73087	73100	0.984274	0.986879	0.89676	0.803893	0.905624	0.921892	0.746714	0.72633	52.669	53.21	-0.541036	17	6	MGTG
745.392	59.9233	PRTC11_SFANQPLEVVYSK_2	54.92	64.92	745.393	745.391	745.392	8904	2	27	3488.42	474446	57.9535	63.9393	PRTC11	SFANQPLEVVYSK	2	13	Label:13C(6)15N(2)@K	45	13	SFANQPLEVVYSk	12	53137	53149	0.967023	0.971657	0.848068	0.562527	0.95459	0.961087	0.821819	0.530124	58.1403	59.92	-1.77967	17	6	MGTG
836.415	69.2789	SQSTM1|421_NYDIGAALDTIQYSK_2	64.28	74.28	836.416	836.414	836.415	11461	2	27	4198.48	1.45295e+06	67.4505	73.4305	SQSTM1|421	NYDIGAALDTIQYSK	2	NA	NA	71	15	NYDIGAALDTIQYSK	13	112030	112044	0.950779	0.955982	0.81041	0.578845	0.949823	0.95499	0.808269	0.572693	69.9747	69.28	0.694714	17	6	MGTG
787.421	72.8278	PRTC15_LSSEAPALFQFDLK_2	67.83	77.83	787.422	787.42	787.421	12166	2	27	4385.81	9453886	70.8702	76.8564	PRTC15	LSSEAPALFQFDLK	2	14	Label:13C(6)15N(2)@K	63	14	LSSEAPALFQFDLk	10	86906	86919	0.94764	0.95108	0.800048	0.220567	0.914674	0.919035	0.74206	0.26556	73.0968	72.83	0.266805	17	6	MGTG
682.849	48.3756	SSBP1|17_ESETTTSLVLER_2	43.38	53.38	682.85	682.848	682.849	6462	2	27	2837.67	1.42162e+06	46.6742	52.6588	SSBP1|17	ESETTTSLVLER	2	NA	NA	34	12	ESETTTSLVLER	11	38169	38180	0.94669	0.95537	0.809087	0.818816	0.939219	0.949464	0.796745	0.818816	47.2946	48.38	-1.08542	17	6	MGTG
761.381	51.6026	P4HB|18_DAPEEEDHVLVLR_2	46.6	56.6	761.382	761.38	761.381	7213	2	27	3036.43	343224	49.7087	55.6751	P4HB|18	DAPEEEDHVLVLR	2	NA	NA	51	13	DAPEEEDHVLVLR	1	62089	62101	0.941526	0.926861	0.755008	-0.253528	0.681959	0.661323	0.46001	-0.518997	50.6071	51.6	-0.992904	17	6	MGTG
451.283	34.9206	PRTC04_DIPVPKPK_2	29.92	39.92	451.284	451.282	451.283	3697	2	27	2123.46	8792388	33.3606	39.3347	PRTC04	DIPVPKPK	2	8	Label:13C(6)15N(2)@K	2	8	DIPVPKPk	9	1205	1212	0.935482	0.944022	0.785982	0.741653	0.939519	0.947496	0.79279	0.761357	35.391	34.92	0.471026	17	6	MGTG
764.835	69.703	ATF4|76_EDAFSGTDWMLEK_2	64.7	74.7	764.836	764.834	764.835	11382	2	27	4177.6	2.02733e+06	67.8072	73.7612	ATF4|76	EDAFSGTDWMLEK	2	NA	NA	42	13	EDAFSGTDWMLEK	6	47101	47113	0.928266	0.931385	0.762798	0.40838	0.900859	0.906438	0.722418	0.403821	69.6267	69.7	-0.073267	17	6	MGTG
680.374	71.767	PRTC14_ELASGLSFPVGFK_2	66.77	76.77	680.375	680.372	680.373	11868	2	27	4306.92	1348183	69.6832	75.6568	PRTC14	ELASGLSFPVGFK	2	13	Label:13C(6)15N(2)@K	48	13	ELASGLSFPVGFk	10	57961	57973	0.926655	0.936702	0.772276	0.700499	0.839661	0.863252	0.663152	0.730569	71.782	71.77	0.011977	17	6	MGTG
801.411	60.0386	PRTC10_GILFVGSGVSGGEEGAR_2	55.04	65.04	801.412	801.41	801.411	9087	2	27	3536.07	16171656	58.3151	64.278	PRTC10	GILFVGSGVSGGEEGAR	2	17	Label:13C(6)15N(4)@R	79	17	GILFVGSGVSGGEEGAr	16	132441	132457	0.924562	0.931514	0.763023	0.451145	0.612553	0.651881	0.45204	0.436424	58.9345	60.04	-1.10546	17	6	MGTG
760.356	53.4877	BAX|66_IGDELDSNMELQR_2	48.49	58.49	760.357	760.356	760.356	7847	2	27	3202.29	207841	51.6184	57.593	BAX|66	IGDELDSNMELQR	2	NA	NA	44	13	IGDELDSNMELQR	6	51397	51409	0.89715	0.900548	0.713669	0.210486	0.884781	0.889654	0.698109	0.206144	53.3714	53.49	-0.118559	17	6	MGTG
587.269	26.2323	TNFRSF12A|28_EQAPGTAPCSR_2	21.23	31.23	587.27	587.269	587.269	1484	2	27	1538.95	79745.7	24.5145	30.4894	TNFRSF12A|28	EQAPGTAPCSR	2	9	Carbamidomethyl@C	28	11	EQAPGTAPCSR	5	29670	29680	0.897146	0.902062	0.715893	0.438555	0.910712	0.916005	0.737209	0.35075	25.6492	26.23	-0.580761	17	6	MGTG
498.802	63.8572	PRTC12_LTILEELR_2	58.86	68.86	498.803	498.801	498.802	10406	2	27	3901.74	52304.8	61.9122	67.864	PRTC12	LTILEELR	2	8	Label:13C(6)15N(4)@R	7	8	LTILEELr	4	6749	6756	0.895097	0.900201	0.713162	0.304598	0.590785	0.643265	0.444842	0.175151	65.029	63.86	1.16905	17	6	MGTG
758.338	44.9663	FBLN1|30_DVLLEACCADGHR_2	39.97	49.97	758.339	758.337	758.338	5608	2	27	2619.47	551048	43.0918	49.0589	FBLN1|30	DVLLEACCADGHR	2	7;8	Carbamidomethyl@C;Carbamidomethyl@C	53	13	DVLLEACCADGHR	4	67069	67081	0.892392	0.889175	0.697442	-0.112896	0.895691	0.896137	0.707276	-0.113005	43.6579	44.97	-1.31209	17	6	MGTG
496.287	29.929	PRTC03_HVLTSIGEK_2	24.93	34.93	496.288	496.286	496.287	3008	2	27	1940.55	189020	28.2534	34.2152	PRTC03	HVLTSIGEK	2	9	Label:13C(6)15N(2)@K	13	9	HVLTSIGEk	3	11351	11359	0.886296	0.893271	0.703191	0.357038	0.909701	0.916767	0.738421	0.0172287	32.3424	29.93	2.41244	17	6	MGTG
573.302	67.5684	PRTC13_NGFILDGFPR_2	62.57	72.57	573.303	573.301	573.302	10696	2	27	3988.14	63117.1	65.7105	71.6804	PRTC13	NGFILDGFPR	2	10	Label:13C(6)15N(4)@R	20	10	NGFILDGFPr	6	20648	20657	0.882728	0.90029	0.713292	0.634878	0.539473	0.575667	0.390515	0.386744	66.4691	67.57	-1.10093	17	6	MGTG
415.74	33.151	MTHFD2|36_EAVVISGR_2	28.15	38.15	415.741	415.739	415.74	2928	2	27	1918.69	92292.5	31.1604	37.0978	MTHFD2|36	EAVVISGR	2	NA	NA	4	8	EAVVISGR	3	3396	3403	0.853354	0.865315	0.665763	0.222496	0.854461	0.866387	0.667127	0.222496	31.9781	33.15	-1.17188	17	6	MGTG
471.236	24.3151	ERO1A|24_REEQPPETAAQR_3	19.32	29.32	471.237	471.235	471.236	1167	3	27	1449.17	102529	22.9878	28.9377	ERO1A|24	REEQPPETAAQR	3	NA	NA	37	12	REEQPPETAAQR	1	40831	40842	0.828194	0.81346	0.604838	-0.314658	0.827076	0.814501	0.605978	-0.366032	24.1528	24.32	-0.167197	17	6	MGTG
558.326	56.6711	PRTC09_GLILVGGYGTR_2	51.67	61.67	558.327	558.325	558.326	9354	2	27	3605.82	282139	54.8303	60.7792	PRTC09	GLILVGGYGTR	2	11	Label:13C(6)15N(4)@R	29	11	GLILVGGYGTr	4	32700	32710	0.809549	0.829061	0.622249	0.755441	0.71349	0.73913	0.529526	0.460694	60.0971	56.67	3.42706	17	6	MGTG
761.368	41.0085	FLNA|1502_NADGTQTVNYVPSR_2	36.01	46.01	761.369	761.367	761.368	4864	2	27	2431.12	241594	39.5074	45.4801	FLNA|1502	NADGTQTVNYVPSR	2	NA	NA	60	14	NADGTQTVNYVPSR	1	80120	80133	0.804091	0.786857	0.576586	-0.248186	0.799862	0.783407	0.57304	-0.195893	40.5187	41.01	-0.491307	17	6	MGTG
594.299	39.5989	FKBP11|26_EAGLETESPVR_2	34.6	44.6	594.3	594.298	594.299	4724	2	27	2393.71	164426	37.7559	43.6942	FKBP11|26	EAGLETESPVR	2	NA	NA	26	11	EAGLETESPVR	2	26170	26180	0.800762	0.799668	0.589982	0.0749531	0.808242	0.807165	0.597999	0.0749531	39.8952	39.6	0.295151	17	6	MGTG
695.832	45.6162	PRTC06_TASEFDSAIAQDK_2	40.62	50.62	695.833	695.831	695.832	5856	2	27	2683.47	1.44443e+06	43.5956	49.5883	PRTC06	TASEFDSAIAQDK	2	13	Label:13C(6)15N(2)@K	43	13	TASEFDSAIAQDk	13	49081	49093	0.788827	0.829958	0.623271	0.668205	0.860402	0.884321	0.690757	0.513026	44.7244	45.62	-0.895577	17	6	MGTG
570.276	58.136	PDIA3|26_RDVLELTDDNFESR_3	53.14	63.14	570.277	570.275	570.276	9606	3	27	3673.92	297942	56.2481	62.2333	PDIA3|26	RDVLELTDDNFESR	3	NA	NA	65	14	RDVLELTDDNFESR	1	94030	94043	0.775623	0.755985	0.545684	-0.248186	0.777842	0.757788	0.54744	-0.344019	61.2319	58.14	3.09192	17	6	MGTG
628.299	27.7828	ERO1A|24_EEQPPETAAQR_2	22.78	32.78	628.3	628.298	628.299	1903	2	27	1649.21	312550	25.9723	31.9604	ERO1A|24	EEQPPETAAQR	2	NA	NA	22	11	EEQPPETAAQR	1	22780	22790	0.771394	0.770736	0.560223	-0.0605066	0.3369	0.367062	0.239273	-0.217073	27.4869	27.78	-0.293129	17	6	MGTG
507.602	41.2944	SSBP1|17_RESETTTSLVLER_3	36.29	46.29	507.603	507.601	507.602	5869	3	27	2686.74	287320	39.416	45.386	SSBP1|17	RESETTTSLVLER	3	NA	NA	49	13	RESETTTSLVLER	2	61561	61573	0.768661	0.761127	0.550708	-0.239687	0.740856	0.738161	0.528611	-0.190838	44.7789	41.29	3.48892	17	6	MGTG
818.891	39.83	ENG|26_ETVHCDLQPVGPER_2	34.83	44.83	818.892	818.89	818.891	4481	2	27	2328.27	85371	37.997	43.9472	ENG|26	ETVHCDLQPVGPER	2	5	Carbamidomethyl@C	58	14	ETVHCDLQPVGPER	3	77936	77949	0.765753	0.770729	0.560216	-0.138991	0.708121	0.719128	0.510917	-0.147443	38.8045	39.83	-1.02548	17	6	MGTG
493.768	26.3416	PRTC01_SSAAPPPPPR_2	21.34	31.34	493.769	493.767	493.768	2279	2	27	1749.15	315980	24.8112	30.8042	PRTC01	SSAAPPPPPR	2	10	Label:13C(6)15N(4)@R	18	10	SSAAPPPPPr	3	18182	18191	0.756967	0.773195	0.562685	0.0664093	0.588961	0.627285	0.431668	0.392535	29.1525	26.34	2.81248	17	6	MGTG
427.226	43.2527	CALR|18_EPAVYFK_2	38.25	48.25	427.227	427.225	427.226	5142	2	27	2502.98	547310	41.448	47.3953	CALR|18	EPAVYFK	2	NA	NA	1	7	EPAVYFK	5	36	42	0.748602	0.788714	0.578505	0.469565	0.767027	0.803465	0.594025	0.488696	41.7163	43.25	-1.53366	17	6	MGTG
560.276	37.7312	FLNA|1502_RDADGTQTVNYVPSR_3	32.73	42.73	560.277	560.275	560.276	4021	3	27	2208.83	249404	36.0601	42.0092	FLNA|1502	RDADGTQTVNYVPSR	3	NA	NA	70	15	RDADGTQTVNYVPSR	1	108586	108600	0.746026	0.728267	0.519348	-0.376282	0.740547	0.726224	0.517453	-0.290123	36.8138	37.73	-0.916209	17	6	MGTG
422.736	38.5693	PRTC05_IGDYAGIK_2	33.57	43.57	422.737	422.735	422.736	4288	2	27	2279.35	4780520	36.7539	42.7291	PRTC05	IGDYAGIK	2	8	Label:13C(6)15N(2)@K	6	8	IGDYAGIk	7	4670	4677	0.74453	0.778859	0.568403	0.547072	0.192656	0.322149	0.20881	0.531199	37.9892	38.57	-0.580823	17	6	MGTG
613.317	30.6463	PRTC02_GISNEGQNASIK_2	25.65	35.65	613.318	613.316	613.317	2593	2	27	1829.6	1.30388e+06	29.0859	35.0493	PRTC02	GISNEGQNASIK	2	12	Label:13C(6)15N(2)@K	40	12	GISNEGQNASIk	10	44879	44890	0.744252	0.784444	0.574103	0.560747	0.571921	0.624875	0.4297	0.270331	30.4933	30.65	-0.156682	17	6	MGTG
586.8	46.4127	PRTC07_SAAGAFGPELSR_2	41.41	51.41	586.801	586.799	586.8	6289	2	27	2793.43	1.14067e+06	44.6296	50.5993	PRTC07	SAAGAFGPELSR	2	12	Label:13C(6)15N(4)@R	32	12	SAAGAFGPELSr	11	33417	33428	0.688435	0.730494	0.52142	0.336575	0.348459	0.428937	0.282224	0.421705	46.5572	46.41	0.147197	17	6	MGTG
554.272	47.8065	HSP90B1|24_REVDVDGTVEEDLGK_3	42.81	52.81	554.273	554.271	554.272	7214	3	27	3036.66	446343	45.8081	51.7476	HSP90B1|24	REVDVDGTVEEDLGK	3	NA	NA	68	15	REVDVDGTVEEDLGK	2	105436	105450	0.630807	0.639654	0.441845	-0.00980866	0.618691	0.627406	0.431766	-0.165824	50.611	47.81	2.801	17	6	MGTG
681.355	58.8019	LSM3|7_REQQTTNTVEEPLDLIR_3	53.8	63.8	681.356	681.354	681.355	8670	3	27	3424.44	118283	56.8617	62.8214	LSM3|7	REQQTTNTVEEPLDLIR	3	NA	NA	78	17	REQQTTNTVEEPLDLIR	1	129241	129257	0.610217	0.603987	0.412844	-0.392743	0.635049	0.628423	0.432599	-0.356113	57.074	58.8	-1.72602	17	6	MGTG
584.304	60.3621	P4HA3|29_DTFSALTSVAR_2	55.36	65.36	584.305	584.303	584.304	9695	2	27	3698.19	310450	58.3939	64.3625	P4HA3|29	DTFSALTSVAR	2	NA	NA	27	11	DTFSALTSVAR	1	28080	28090	0.572628	0.578112	0.392421	-0.134053	0.574544	0.580306	0.394134	-0.202439	61.6365	60.36	1.27654	17	6	MGTG
329.53	27.6908	MTHFD2|36_REAVVISGR_3	22.69	32.69	329.531	329.529	329.53	1727	3	27	1604.33	357197	25.6376	31.605	MTHFD2|36	REAVVISGR	3	NA	NA	10	9	REAVVISGR	1	8055	8063	0.550791	0.564065	0.381527	-0.218292	0.543374	0.557813	0.376719	-0.137463	26.7388	27.69	-0.951206	17	6	MGTG
607.616	43.539	TMEM59|36_REAFDSVLGDTASCHR_3	38.54	48.54	607.617	607.615	607.616	5298	3	27	2540.97	4.30538e+06	41.4839	47.4266	TMEM59|36	REAFDSVLGDTASCHR	3	14	Carbamidomethyl@C	75	16	REAFDSVLGDTASCHR	1	124336	124351	0.539677	0.538925	0.362339	-0.439817	0.532765	0.534776	0.359208	-0.403807	42.3496	43.54	-1.19042	17	6	MGTG
776.86	67.1829	PDIA3|26_DVLELTDDNFESR_2	62.18	72.18	776.861	776.859	776.86	10537	2	27	3941.75	765552	65.2813	71.2596	PDIA3|26	DVLELTDDNFESR	2	NA	NA	52	13	DVLELTDDNFESR	1	64333	64345	0.477893	0.489548	0.325676	-0.0811985	0.516666	0.523393	0.350668	-0.20305	65.6959	67.18	-1.4841	17	6	MGTG
443.882	22.4798	TNFRSF12A|28_REQAPGTAPCSR_3	17.48	27.48	443.884	443.882	443.883	1160	3	27	1447.18	208332	21.41	27.3759	TNFRSF12A|28	REQAPGTAPCSR	3	10	Carbamidomethyl@C	33	12	REQAPGTAPCSR	1	36684	36695	0.447592	0.466449	0.308934	-0.320719	0.473567	0.489701	0.325788	-0.320719	24.1197	22.48	1.63974	17	6	MGTG
605.827	72.7819	BCL2|130_FATVVEELFR_2	67.78	77.78	605.828	605.826	605.827	11641	2	27	4246.73	684724	70.7412	76.721	BCL2|130	FATVVEELFR	2	NA	NA	16	10	FATVVEELFR	1	14564	14573	0.371617	0.402204	0.263512	-0.281853	0.330131	0.365673	0.238323	-0.22278	70.7788	72.78	-2.00123	17	6	MGTG
559.957	43.3358	P4HB|18_RDAPEEEDHVLVLR_3	38.34	48.34	559.958	559.956	559.957	5192	3	27	2514.65	179248	41.3106	47.2618	P4HB|18	RDAPEEEDHVLVLR	3	NA	NA	55	14	RDAPEEEDHVLVLR	1	71007	71020	0.363181	0.383112	0.250295	-0.516136	0.404541	0.421394	0.276918	-0.475881	41.9109	43.34	-1.42911	17	6	MGTG
752.854	54.3255	HSP90B1|24_EVDVDGTVEEDLGK_2	49.33	59.33	752.855	752.853	752.854	8667	2	27	3423.74	1463546	52.3747	58.3345	HSP90B1|24	EVDVDGTVEEDLGK	2	NA	NA	57	14	EVDVDGTVEEDLGK	2	77039	77052	0.35124	0.392299	0.25664	0.0604457	0.28007	0.330835	0.214661	-0.0725262	57.0623	54.33	2.73225	17	6	MGTG
557.928	36.8535	FBLN1|30_RDVLLEACCADGHR_3	31.85	41.85	557.929	557.927	557.928	3889	3	27	2173.87	903331	34.9109	40.8598	FBLN1|30	RDVLLEACCADGHR	3	8;9	Carbamidomethyl@C;Carbamidomethyl@C	64	14	RDVLLEACCADGHR	1	90195	90208	0.340898	0.361777	0.23566	-0.516136	0.373044	0.390944	0.255702	-0.507428	36.2311	36.85	-0.618886	17	6	MGTG
598.297	34.4875	ENG|26_RETVHCDLQPVGPER_3	29.49	39.49	598.298	598.296	598.297	3117	3	27	1970.12	323918	32.5825	38.5408	ENG|26	RETVHCDLQPVGPER	3	6	Carbamidomethyl@C	69	15	RETVHCDLQPVGPER	2	106066	106080	0.332069	0.366253	0.238719	-0.280451	0.353885	0.386796	0.252836	-0.334997	32.8353	34.49	-1.65468	17	6	MGTG
496.295	48.7357	ERN1|280_LTPTLYVGK_2	43.74	53.74	496.296	496.294	496.295	7313	2	27	3063.41	319657	47.0037	52.9721	ERN1|280	LTPTLYVGK	2	NA	NA	14	9	LTPTLYVGK	2	12847	12855	0.279299	0.347291	0.225797	-0.108688	0.545593	0.576832	0.391423	0.0058651	51.0569	48.74	2.31687	17	6	MGTG
702.834	41.5014	CPSF7|33_DVLTATSQPSDDR_2	36.5	46.5	702.835	702.833	702.834	5804	2	27	2670.23	552413	39.6856	45.6604	CPSF7|33	DVLTATSQPSDDR	2	NA	NA	46	13	DVLTATSQPSDDR	1	56845	56857	0.268845	0.302193	0.195437	-0.0300152	0.270113	0.303366	0.196221	-0.218356	44.5039	41.5	3.00389	17	6	MGTG
520.925	34.7462	CPSF7|33_RDVLTATSQPSDDR_3	29.75	39.75	520.926	520.924	520.925	3206	3	27	1994.02	309240	32.5786	38.533	CPSF7|33	RDVLTATSQPSDDR	3	NA	NA	61	14	RDVLTATSQPSDDR	1	81875	81888	0.257801	0.288584	0.186369	-0.348374	0.289306	0.317235	0.205509	-0.301887	33.2337	34.75	-1.51627	17	6	MGTG
448.569	33.1905	FKBP11|26_REAGLETESPVR_3	28.19	38.19	448.57	448.568	448.569	3527	3	27	2078.91	154984	31.0001	36.9577	FKBP11|26	REAGLETESPVR	3	NA	NA	39	12	REAGLETESPVR	1	43757	43768	0.224967	0.266276	0.171586	-0.338901	0.222676	0.263779	0.169938	-0.344961	34.6485	33.19	1.45854	17	6	MGTG
364.519	25.9378	CENPU|49_RDSDVSSIGR_3	20.94	30.94	364.521	364.519	364.519	2166	3	27	1719.26	254586	24.1781	30.1729	CENPU|49	RDSDVSSIGR	3	NA	NA	19	10	RDSDVSSIGR	2	19946	19955	0.186159	0.251852	0.16208	-0.109524	0.17504	0.24128	0.155135	-0.118533	28.6543	25.94	2.71428	17	6	MGTG
794.019	50.9195	EIF4B|46_RDLEGDVSTTWHSNDDDVYR_3	45.92	55.92	794.02	794.018	794.019	6995	3	27	2978.58	387927	48.9157	54.8946	EIF4B|46	RDLEGDVSTTWHSNDDDVYR	3	NA	NA	83	20	RDLEGDVSTTWHSNDDDVYR	1	135898	135917	0.159018	0.190459	0.121995	-0.158852	0.173723	0.203632	0.130549	-0.27203	49.643	50.92	-1.27696	17	6	MGTG
557.299	44.2714	PLA2R1|21_EGVAAALTPER_2	39.27	49.27	557.3	557.298	557.299	5603	2	27	2618.3	1.29495e+06	42.3689	48.3364	PLA2R1|21	EGVAAALTPER	2	NA	NA	23	11	EGVAAALTPER	1	24290	24300	0.13946	0.195275	0.12512	-0.185272	0.12115	0.179054	0.114607	-0.260976	43.6383	44.27	-0.631658	17	6	MGTG
542.269	42.9302	CASP3|29_SGISLDNSYK_2	37.93	47.93	542.27	542.269	542.269	5025	2	27	2473.23	321473	41.2205	47.1956	CASP3|29	SGISLDNSYK	2	NA	NA	15	10	SGISLDNSYK	1	13295	13304	0.113802	0.167208	0.10695	-0.166667	0.102605	0.157242	0.100521	-0.175676	41.2205	42.93	-1.70951	17	6	MGTG
630.957	51.6242	HSP90B1|22_RDDEVDVDGTVEEDLGK_3	46.62	56.62	630.958	630.956	630.957	7592	3	27	3136.31	1.29865e+06	49.8822	55.8553	HSP90B1|22	RDDEVDVDGTVEEDLGK	3	NA	NA	77	17	RDDEVDVDGTVEEDLGK	1	127337	127353	0.075626	0.114371	0.0729708	-0.11598	0.101469	0.140489	0.0897349	-0.205014	52.2718	51.62	0.651793	17	6	MGTG
576.587	27.2043	IGFBP4|22_RDEAIHCPPCSEEK_3	22.2	32.2	576.588	576.586	576.587	1630	3	27	1578.66	72030.9	25.3481	31.3101	IGFBP4|22	RDEAIHCPPCSEEK	3	7;10	Carbamidomethyl@C;Carbamidomethyl@C	62	14	RDEAIHCPPCSEEK	1	84202	84215	0.0737655	0.120566	0.0769416	-0.050969	0.0725127	0.119439	0.076219	-0.278665	26.311	27.2	-0.889046	17	6	MGTG
832.87	52.702	TMEM59|36_EAFDSVLGDTASCHR_2	47.7	57.7	832.871	832.869	832.87	7365	2	27	3077.35	391848	51.0686	57.0351	TMEM59|36	EAFDSVLGDTASCHR	2	13	Carbamidomethyl@C	66	15	EAFDSVLGDTASCHR	1	94544	94558	0.0603492	0.103684	0.0661262	-0.398838	0.101115	0.140629	0.0898249	-0.305161	51.2892	52.7	-1.4108	17	6	MGTG
467.733	29.7107	CENPU|49_NSDVSSIGR_2	24.71	34.71	467.734	467.732	467.733	2588	2	27	1828.43	252037	27.8597	33.8451	CENPU|49	NSDVSSIGR	2	NA	NA	11	9	NSDVSSIGR	1	9663	9671	0.0302008	0.107747	0.0687273	-0.286474	0.0241629	0.103136	0.0657757	-0.359787	30.4738	29.71	0.763803	17	6	MGTG
337.187	35.4809	CALR|18_REPAVYFK_3	30.48	40.48	337.188	337.186	337.187	3118	3	27	1970.85	130561	32.8475	38.8237	CALR|18	REPAVYFK	3	NA	NA	3	8	REPAVYFK	0	2052	2059	0	0	0	-0.557198	0	0	0	-0.319376	32.8475	35.48	-2.63249	17	6	MGTG
786.327	31.4927	IGFBP4|22_DEAIHCPPCSEEK_2	26.49	36.49	786.328	786.326	786.327	2392	2	27	1777.89	100974	29.6315	35.6181	IGFBP4|22	DEAIHCPPCSEEK	2	6;9	Carbamidomethyl@C;Carbamidomethyl@C	54	13	DEAIHCPPCSEEK	0	68821	68833	0	0	0	0.0935193	0	0	0	-0.317846	29.6315	31.49	-1.85849	17	6	MGTG
806.875	19.0125	SHMT2|27_QHSNAAQTQTGEANR_2	14.01	24.01	806.876	806.874	806.875	105	2	27	1111.33	16577.9	18.5221	24.503	SHMT2|27	QHSNAAQTQTGEANR	2	NA	NA	67	15	QHSNAAQTQTGEANR	0	97078	97092	0	0	0	0.434211	0	0	0	-0.346719	18.5221	19.01	-0.48788	17	6	MGTG
590.614	17.8991	SHMT2|27_REHSNAAQTQTGEANR_3	12.9	22.9	590.615	590.613	590.614	1	3	27	1067.07	11752.7	17.7845	23.7773	SHMT2|27	REHSNAAQTQTGEANR	3	NA	NA	73	16	REHSNAAQTQTGEANR	0	113626	113641	0	0	0	-0.0196999	0	0	0	-0.500528	17.7845	17.9	-0.115509	17	6	MGTG
867.881	58.2026	HSP90B1|22_DDEVDVDGTVEEDLGK_2	53.2	63.2	867.882	867.88	867.881	8458	2	27	3366.98	766362	56.1164	62.1061	HSP90B1|22	DDEVDVDGTVEEDLGK	2	NA	NA	74	16	DDEVDVDGTVEEDLGK	0	121231	121246	0	0	0	0.467324	0	0	0	-0.288941	56.1164	58.2	-2.0836	17	6	MGTG
848.393	68.08	UQCRHL|15_RDPEEEEEEEEELVDPLTTVR_3	63.08	73.08	848.394	848.392	848.393	10728	3	27	3997.25	753811	66.5977	72.5819	UQCRHL|15	RDPEEEEEEEEELVDPLTTVR	3	NA	NA	84	21	RDPEEEEEEEEELVDPLTTVR	0	139091	139111	0	0	0	0.238514	0	0	0	-0.429372	66.6209	68.08	-1.4591	17	6	MGTG
745.392	59.9233	PRTC11_SFANQPLEVVYSK_2	54.92	64.92	745.393	745.391	745.392	9021	2	27	3546.48	23183168	57.9517	63.9384	PRTC11	SFANQPLEVVYSK	2	13	Label:13C(6)15N(2)@K	45	13	SFANQPLEVVYSk	10	52781	52793	0.949808	0.952304	0.802587	0.50711	0.907431	0.915521	0.736443	0.324251	59.1079	59.92	-0.812062	18	6	MGTG
761.381	51.6026	P4HB|18_DAPEEEDHVLVLR_2	46.6	56.6	761.382	761.38	761.381	7180	2	27	3052	191166	49.7162	55.691	P4HB|18	DAPEEEDHVLVLR	2	NA	NA	51	13	DAPEEEDHVLVLR	1	61481	61493	0.941526	0.926861	0.755008	-0.253528	0.681959	0.661323	0.46001	-0.518997	50.8667	51.6	-0.733253	18	6	MGTG
836.415	69.2789	SQSTM1|421_NYDIGAALDTIQYSK_2	64.28	74.28	836.416	836.414	836.415	11375	2	27	4207.5	2.14535e+06	67.4533	73.4273	SQSTM1|421	NYDIGAALDTIQYSK	2	NA	NA	71	15	NYDIGAALDTIQYSK	8	111096	111110	0.940918	0.942748	0.783537	0.291456	0.944788	0.945769	0.789379	0.288858	70.125	69.28	0.845005	18	6	MGTG
764.835	69.703	ATF4|76_EDAFSGTDWMLEK_2	64.7	74.7	764.836	764.834	764.835	11261	2	27	4176.81	565352	67.8071	73.7743	ATF4|76	EDAFSGTDWMLEK	2	NA	NA	42	13	EDAFSGTDWMLEK	6	46433	46445	0.936642	0.937567	0.773855	0.427052	0.901789	0.905992	0.721747	0.41294	69.6135	69.7	-0.086544	18	6	MGTG
787.421	72.8278	PRTC15_LSSEAPALFQFDLK_2	67.83	77.83	787.422	787.42	787.421	12049	2	27	4387.22	2.55134e+06	70.8887	76.8521	PRTC15	LSSEAPALFQFDLK	2	14	Label:13C(6)15N(2)@K	63	14	LSSEAPALFQFDLk	5	86013	86026	0.92789	0.92841	0.757648	-0.0197643	0.89129	0.890684	0.699548	0.0273628	73.1203	72.83	0.290266	18	6	MGTG
801.411	60.0386	PRTC10_GILFVGSGVSGGEEGAR_2	55.04	65.04	801.412	801.41	801.411	8969	2	27	3533.49	17621352	58.319	64.2827	PRTC10	GILFVGSGVSGGEEGAR	2	17	Label:13C(6)15N(4)@R	79	17	GILFVGSGVSGGEEGAr	18	131223	131239	0.922677	0.929544	0.759598	0.354464	0.599834	0.639886	0.442037	0.337912	58.8915	60.04	-1.14847	18	6	MGTG
682.849	48.3756	SSBP1|17_ESETTTSLVLER_2	43.38	53.38	682.85	682.848	682.849	6386	2	27	2839.92	1690930	46.6792	52.6298	SSBP1|17	ESETTTSLVLER	2	NA	NA	34	12	ESETTTSLVLER	9	37667	37678	0.916118	0.926742	0.754806	0.487104	0.906654	0.919215	0.742351	0.487104	47.3321	48.38	-1.04794	18	6	MGTG
680.374	71.767	PRTC14_ELASGLSFPVGFK_2	66.77	76.77	680.375	680.372	680.373	11920	2	27	4351.69	883798	69.7001	75.6607	PRTC14	ELASGLSFPVGFK	2	13	Label:13C(6)15N(2)@K	48	13	ELASGLSFPVGFk	12	57533	57545	0.915109	0.928081	0.757085	0.71206	0.805893	0.835222	0.629322	0.770788	72.5282	71.77	0.758222	18	6	MGTG
573.302	67.5684	PRTC13_NGFILDGFPR_2	62.57	72.57	573.303	573.301	573.302	11140	2	27	4142.87	284746	65.7114	71.6959	PRTC13	NGFILDGFPR	2	10	Label:13C(6)15N(4)@R	20	10	NGFILDGFPr	6	21293	21302	0.904465	0.918337	0.740935	0.63462	0.65182	0.67657	0.473069	0.379279	69.0478	67.57	1.47776	18	6	MGTG
773.895	53.205	PRTC08_ELGQSGVDTYLQTK_2	48.21	58.21	773.896	773.894	773.895	7823	2	27	3222.18	295073	51.4341	57.3894	PRTC08	ELGQSGVDTYLQTK	2	14	Label:13C(6)15N(2)@K	56	14	ELGQSGVDTYLQTk	6	72714	72727	0.897992	0.905945	0.721677	0.398105	0.869695	0.878786	0.683292	0.350935	53.7029	53.21	0.492936	18	6	MGTG
498.802	63.8572	PRTC12_LTILEELR_2	58.86	68.86	498.803	498.801	498.802	10285	2	27	3898.31	48010.9	61.9142	67.8637	PRTC12	LTILEELR	2	8	Label:13C(6)15N(4)@R	7	8	LTILEELr	5	6680	6687	0.896105	0.906856	0.723049	0.422003	0.591171	0.648426	0.449145	0.278325	64.9718	63.86	1.11178	18	6	MGTG
760.356	53.4877	BAX|66_IGDELDSNMELQR_2	48.49	58.49	760.357	760.356	760.356	7737	2	27	3199.1	280983	51.6067	57.5815	BAX|66	IGDELDSNMELQR	2	NA	NA	44	13	IGDELDSNMELQR	7	50693	50705	0.88476	0.896065	0.707173	0.304766	0.87189	0.885015	0.691704	0.295647	53.3183	53.49	-0.171677	18	6	MGTG
451.283	34.9206	PRTC04_DIPVPKPK_2	29.92	39.92	451.284	451.282	451.283	3795	2	27	2167.86	848782	33.3885	39.3493	PRTC04	DIPVPKPK	2	8	Label:13C(6)15N(2)@K	2	8	DIPVPKPk	4	1353	1360	0.868625	0.884116	0.690478	0.364258	0.904652	0.9158	0.736884	0.378489	36.131	34.92	1.21096	18	6	MGTG
758.338	44.9663	FBLN1|30_DVLLEACCADGHR_2	39.97	49.97	758.339	758.337	758.338	5509	2	27	2615.44	365766	43.0779	49.0709	FBLN1|30	DVLLEACCADGHR	2	7;8	Carbamidomethyl@C;Carbamidomethyl@C	53	13	DVLLEACCADGHR	4	66305	66317	0.866962	0.868076	0.669287	-0.113656	0.85861	0.864567	0.664815	-0.113548	43.5906	44.97	-1.37937	18	6	MGTG
496.287	29.929	PRTC03_HVLTSIGEK_2	24.93	34.93	496.288	496.286	496.287	2526	2	27	1828.78	37237.1	28.247	34.2011	PRTC03	HVLTSIGEK	2	9	Label:13C(6)15N(2)@K	13	9	HVLTSIGEk	3	10790	10798	0.837652	0.85125	0.64831	0.357038	0.780812	0.800623	0.590996	0.0172287	30.4796	29.93	0.549594	18	6	MGTG
594.299	39.5989	FKBP11|26_EAGLETESPVR_2	34.6	44.6	594.3	594.298	594.299	4631	2	27	2389.4	208921	37.7574	43.7307	FKBP11|26	EAGLETESPVR	2	NA	NA	26	11	EAGLETESPVR	2	25826	25836	0.817342	0.815926	0.607545	0.0747654	0.828715	0.826885	0.619778	0.0747654	39.8234	39.6	0.223364	18	6	MGTG
761.368	41.0085	FLNA|1502_NADGTQTVNYVPSR_2	36.01	46.01	761.369	761.367	761.368	4795	2	27	2433.12	125958	39.5013	45.4459	FLNA|1502	NADGTQTVNYVPSR	2	NA	NA	60	14	NADGTQTVNYVPSR	1	79305	79318	0.804091	0.786857	0.576586	-0.248186	0.799862	0.783407	0.57304	-0.195893	40.552	41.01	-0.457986	18	6	MGTG
558.326	56.6711	PRTC09_GLILVGGYGTR_2	51.67	61.67	558.327	558.325	558.326	9228	2	27	3600.91	264785	54.8172	60.7717	PRTC09	GLILVGGYGTR	2	11	Label:13C(6)15N(4)@R	29	11	GLILVGGYGTr	4	32266	32276	0.801875	0.822856	0.615241	0.755253	0.662294	0.693035	0.487454	0.460319	60.0152	56.67	3.34515	18	6	MGTG
695.832	45.6162	PRTC06_TASEFDSAIAQDK_2	40.62	50.62	695.833	695.831	695.832	5749	2	27	2677.85	6890454	43.6335	49.576	PRTC06	TASEFDSAIAQDK	2	13	Label:13C(6)15N(2)@K	43	13	TASEFDSAIAQDk	15	48389	48401	0.788544	0.829193	0.622399	0.546678	0.870501	0.892543	0.702162	0.39074	44.6309	45.62	-0.989113	18	6	MGTG
507.602	41.2944	SSBP1|17_RESETTTSLVLER_3	36.29	46.29	507.603	507.601	507.602	5806	3	27	2692.5	480178	39.4075	45.3921	SSBP1|17	RESETTTSLVLER	3	NA	NA	49	13	RESETTTSLVLER	2	60869	60881	0.783176	0.777273	0.566795	-0.239687	0.757062	0.755809	0.545512	-0.190838	44.875	41.29	3.58496	18	6	MGTG
427.226	43.2527	CALR|18_EPAVYFK_2	38.25	48.25	427.227	427.225	427.226	5033	2	27	2495.08	1.28084e+06	41.4512	47.3956	CALR|18	EPAVYFK	2	NA	NA	1	7	EPAVYFK	4	18	24	0.757078	0.790897	0.580772	0.60913	0.768966	0.80078	0.591163	0.628261	41.5847	43.25	-1.66532	18	6	MGTG
560.276	37.7312	FLNA|1502_RDADGTQTVNYVPSR_3	32.73	42.73	560.277	560.275	560.276	3984	3	27	2218.15	348078	36.0525	42.0214	FLNA|1502	RDADGTQTVNYVPSR	3	NA	NA	70	15	RDADGTQTVNYVPSR	1	107652	107666	0.746026	0.728267	0.519348	-0.376282	0.740547	0.726224	0.517453	-0.290123	36.9692	37.73	-0.760754	18	6	MGTG
422.736	38.5693	PRTC05_IGDYAGIK_2	33.57	43.57	422.737	422.735	422.736	4192	2	27	2273.28	10220941	36.7515	42.7075	PRTC05	IGDYAGIK	2	8	Label:13C(6)15N(2)@K	6	8	IGDYAGIk	9	4629	4636	0.744416	0.781607	0.571199	0.535304	0.207052	0.338921	0.220124	0.313082	37.888	38.57	-0.68196	18	6	MGTG
493.768	26.3416	PRTC01_SSAAPPPPPR_2	21.34	31.34	493.769	493.767	493.768	2112	2	27	1719.34	13987.8	24.8142	30.7762	PRTC01	SSAAPPPPPR	2	10	Label:13C(6)15N(4)@R	18	10	SSAAPPPPPr	3	17900	17909	0.742959	0.765635	0.555151	0.0584298	0.580192	0.624439	0.429345	0.376319	28.6557	26.34	2.31567	18	6	MGTG
613.317	30.6463	PRTC02_GISNEGQNASIK_2	25.65	35.65	613.318	613.316	613.317	2512	2	27	1824.87	17325302	29.0916	35.0451	PRTC02	GISNEGQNASIK	2	12	Label:13C(6)15N(2)@K	40	12	GISNEGQNASIk	11	44212	44223	0.738309	0.778028	0.56756	0.484285	0.54561	0.600875	0.410362	0.189077	30.4145	30.65	-0.23546	18	6	MGTG
586.8	46.4127	PRTC07_SAAGAFGPELSR_2	41.41	51.41	586.801	586.799	586.8	6323	2	27	2823.77	3.64265e+06	44.6286	50.5855	PRTC07	SAAGAFGPELSR	2	12	Label:13C(6)15N(4)@R	32	12	SAAGAFGPELSr	9	33135	33146	0.690825	0.722807	0.514297	0.480832	0.343699	0.413092	0.271102	0.215856	47.0628	46.41	0.652838	18	6	MGTG
818.891	39.83	ENG|26_ETVHCDLQPVGPER_2	34.83	44.83	818.892	818.89	818.891	4409	2	27	2328.71	234924	38.0003	43.9884	ENG|26	ETVHCDLQPVGPER	2	5	Carbamidomethyl@C	58	14	ETVHCDLQPVGPER	2	77121	77134	0.677089	0.681683	0.477503	-0.24174	0.761545	0.755175	0.544897	-0.237386	38.8118	39.83	-1.0182	18	6	MGTG
752.854	54.3255	HSP90B1|24_EVDVDGTVEEDLGK_2	49.33	59.33	752.855	752.853	752.854	8830	2	27	3496.34	619358	52.3698	58.3383	HSP90B1|24	EVDVDGTVEEDLGK	2	NA	NA	57	14	EVDVDGTVEEDLGK	1	76783	76796	0.673968	0.665295	0.463389	-0.0204901	0.634671	0.623679	0.428725	-0.14057	58.2723	54.33	3.94229	18	6	MGTG
415.74	33.151	MTHFD2|36_EAVVISGR_2	28.15	38.15	415.741	415.739	415.74	2829	2	27	1910.02	186768	31.1349	37.093	MTHFD2|36	EAVVISGR	2	NA	NA	4	8	EAVVISGR	1	3348	3355	0.638467	0.645816	0.446965	-0.119869	0.64703	0.653539	0.453433	-0.119869	31.8337	33.15	-1.31634	18	6	MGTG
554.272	47.8065	HSP90B1|24_REVDVDGTVEEDLGK_3	42.81	52.81	554.273	554.271	554.272	7107	3	27	3032.25	1.13124e+06	45.7762	51.738	HSP90B1|24	REVDVDGTVEEDLGK	3	NA	NA	68	15	REVDVDGTVEEDLGK	1	104418	104432	0.63066	0.625538	0.430241	-0.0873206	0.605321	0.600671	0.4102	-0.243336	50.5375	47.81	2.72755	18	6	MGTG
681.355	58.8019	LSM3|7_REQQTTNTVEEPLDLIR_3	53.8	63.8	681.356	681.354	681.355	9540	3	27	3685.37	337677	56.8494	62.8197	LSM3|7	REQQTTNTVEEPLDLIR	3	NA	NA	78	17	REQQTTNTVEEPLDLIR	1	130215	130231	0.610216	0.603986	0.412844	-0.395627	0.606248	0.602154	0.411381	-0.358997	61.4228	58.8	2.62283	18	6	MGTG
559.957	43.3358	P4HB|18_RDAPEEEDHVLVLR_3	38.34	48.34	559.958	559.956	559.957	5149	3	27	2523.56	216227	41.2775	47.2607	P4HB|18	RDAPEEEDHVLVLR	3	NA	NA	55	14	RDAPEEEDHVLVLR	2	70283	70296	0.595071	0.6062	0.414614	-0.409246	0.636845	0.64644	0.447486	-0.369077	42.0594	43.34	-1.2806	18	6	MGTG
337.187	35.4809	CALR|18_REPAVYFK_3	30.48	40.48	337.188	337.186	337.187	3569	3	27	2108.52	23324.1	32.8698	38.8296	CALR|18	REPAVYFK	3	NA	NA	3	8	REPAVYFK	1	2445	2452	0.576975	0.58882	0.400815	-0.35769	0.511381	0.532973	0.357851	-0.134647	35.1419	35.48	-0.338071	18	6	MGTG
776.86	67.1829	PDIA3|26_DVLELTDDNFESR_2	62.18	72.18	776.861	776.859	776.86	10562	2	27	3982.26	784256	65.279	71.2417	PDIA3|26	DVLELTDDNFESR	2	NA	NA	52	13	DVLELTDDNFESR	1	64013	64025	0.555939	0.559525	0.378033	-0.0760964	0.541619	0.545656	0.367439	-0.197948	66.371	67.18	-0.809018	18	6	MGTG
848.393	68.08	UQCRHL|15_RDPEEEEEEEEELVDPLTTVR_3	63.08	73.08	848.394	848.392	848.393	10728	3	27	4029.43	156975	66.5957	72.575	UQCRHL|15	RDPEEEEEEEEELVDPLTTVR	3	NA	NA	84	21	RDPEEEEEEEEELVDPLTTVR	1	138311	138331	0.463473	0.47373	0.314185	0.30981	0.430917	0.440047	0.290076	-0.358075	67.1571	68.08	-0.922869	18	6	MGTG
598.297	34.4875	ENG|26_RETVHCDLQPVGPER_3	29.49	39.49	598.298	598.296	598.297	3063	3	27	1974.06	456699	32.5768	38.5485	ENG|26	RETVHCDLQPVGPER	3	6	Carbamidomethyl@C	69	15	RETVHCDLQPVGPER	2	105104	105118	0.428952	0.458806	0.303446	-0.280451	0.479202	0.504906	0.336946	-0.334997	32.901	34.49	-1.58905	18	6	MGTG
605.827	72.7819	BCL2|130_FATVVEELFR_2	67.78	77.78	605.828	605.826	605.827	11551	2	27	4254.48	1.23537e+06	70.7279	76.7239	BCL2|130	FATVVEELFR	2	NA	NA	16	10	FATVVEELFR	1	14462	14471	0.371617	0.402204	0.263512	-0.281853	0.330131	0.365673	0.238323	-0.22278	70.908	72.78	-1.87199	18	6	MGTG
557.928	36.8535	FBLN1|30_RDVLLEACCADGHR_3	31.85	41.85	557.929	557.927	557.928	3848	3	27	2182.1	1.53563e+06	34.9005	40.8601	FBLN1|30	RDVLLEACCADGHR	3	8;9	Carbamidomethyl@C;Carbamidomethyl@C	64	14	RDVLLEACCADGHR	1	89367	89380	0.340898	0.361777	0.23566	-0.516136	0.373044	0.390944	0.255702	-0.507428	36.3684	36.85	-0.481587	18	6	MGTG
702.834	41.5014	CPSF7|33_DVLTATSQPSDDR_2	36.5	46.5	702.835	702.833	702.834	4886	2	27	2456.54	76652.6	39.6876	45.6626	CPSF7|33	DVLTATSQPSDDR	2	NA	NA	46	13	DVLTATSQPSDDR	1	55145	55157	0.301784	0.331664	0.21522	-0.0249132	0.281128	0.31321	0.202808	-0.213254	40.9424	41.5	-0.557633	18	6	MGTG
630.957	51.6242	HSP90B1|22_RDDEVDVDGTVEEDLGK_3	46.62	56.62	630.958	630.956	630.957	7017	3	27	3008.53	2973062	49.8893	55.8457	HSP90B1|22	RDDEVDVDGTVEEDLGK	3	NA	NA	77	17	RDDEVDVDGTVEEDLGK	1	125111	125127	0.285314	0.308985	0.199979	-0.0986723	0.293722	0.317049	0.205384	-0.193475	50.1422	51.62	-1.47779	18	6	MGTG
496.295	48.7357	ERN1|280_LTPTLYVGK_2	43.74	53.74	496.296	496.294	496.295	6392	2	27	2841.65	104021	47.0047	52.9409	ERN1|280	LTPTLYVGK	2	NA	NA	14	9	LTPTLYVGK	2	11702	11710	0.281525	0.347702	0.226076	-0.0976906	0.513936	0.548698	0.369753	-0.00513196	47.3608	48.74	-1.37925	18	6	MGTG
520.925	34.7462	CPSF7|33_RDVLTATSQPSDDR_3	29.75	39.75	520.926	520.924	520.925	3180	3	27	2005.18	231662	32.5729	38.5407	CPSF7|33	RDVLTATSQPSDDR	3	NA	NA	61	14	RDVLTATSQPSDDR	1	81086	81099	0.257801	0.288584	0.186369	-0.348374	0.289306	0.317235	0.205509	-0.301887	33.4196	34.75	-1.33038	18	6	MGTG
584.304	60.3621	P4HA3|29_DTFSALTSVAR_2	55.36	65.36	584.305	584.303	584.304	8899	2	27	3514.77	297920	58.3698	64.3542	P4HA3|29	DTFSALTSVAR	2	NA	NA	27	11	DTFSALTSVAR	1	26866	26876	0.183759	0.232032	0.149075	-0.163321	0.16262	0.212867	0.13656	-0.231707	58.5795	60.36	-1.78051	18	6	MGTG
471.236	24.3151	ERO1A|24_REEQPPETAAQR_3	19.32	29.32	471.237	471.235	471.236	2017	3	27	1693.66	1.68291e+06	22.9846	28.9412	ERO1A|24	REEQPPETAAQR	3	NA	NA	37	12	REEQPPETAAQR	1	41781	41792	0.173977	0.216854	0.139159	-0.33284	0.158334	0.20163	0.129248	-0.384214	28.2277	24.32	3.90774	18	6	MGTG
590.614	17.8991	SHMT2|27_REHSNAAQTQTGEANR_3	12.9	22.9	590.615	590.613	590.614	9	3	27	1070.49	8346.19	17.7872	23.7647	SHMT2|27	REHSNAAQTQTGEANR	3	NA	NA	73	16	REHSNAAQTQTGEANR	1	112728	112743	0.159474	0.195391	0.125195	0.0573493	0.0689216	0.120579	0.0769501	-0.443151	17.8415	17.9	-0.05851	18	6	MGTG
794.019	50.9195	EIF4B|46_RDLEGDVSTTWHSNDDDVYR_3	45.92	55.92	794.02	794.018	794.019	6904	3	27	2977.74	454626	48.9211	54.8811	EIF4B|46	RDLEGDVSTTWHSNDDDVYR	3	NA	NA	83	20	RDLEGDVSTTWHSNDDDVYR	1	134677	134696	0.159018	0.190459	0.121995	-0.158852	0.173723	0.203632	0.130549	-0.27203	49.6291	50.92	-1.29092	18	6	MGTG
570.276	58.136	PDIA3|26_RDVLELTDDNFESR_3	53.14	63.14	570.277	570.275	570.276	8910	3	27	3517.85	213464	56.2378	62.2348	PDIA3|26	RDVLELTDDNFESR	3	NA	NA	65	14	RDVLELTDDNFESR	1	92149	92162	0.15587	0.19813	0.126974	-0.269956	0.175039	0.215438	0.138236	-0.361436	58.6308	58.14	0.490848	18	6	MGTG
557.299	44.2714	PLA2R1|21_EGVAAALTPER_2	39.27	49.27	557.3	557.298	557.299	5540	2	27	2623.61	1.06368e+06	42.3462	48.3407	PLA2R1|21	EGVAAALTPER	2	NA	NA	23	11	EGVAAALTPER	1	23996	24006	0.13946	0.195275	0.12512	-0.185272	0.12115	0.179054	0.114607	-0.260976	43.7268	44.27	-0.543209	18	6	MGTG
867.881	58.2026	HSP90B1|22_DDEVDVDGTVEEDLGK_2	53.2	63.2	867.882	867.88	867.881	9532	2	27	3683.27	632765	56.1332	62.1083	HSP90B1|22	DDEVDVDGTVEEDLGK	2	NA	NA	74	16	DDEVDVDGTVEEDLGK	1	122568	122583	0.134578	0.160266	0.10247	0.554209	0.357935	0.376846	0.245983	-0.198777	61.3879	58.2	3.18788	18	6	MGTG
587.269	26.2323	TNFRSF12A|28_EQAPGTAPCSR_2	21.23	31.23	587.27	587.269	587.269	2437	2	27	1805.46	7516641	24.5237	30.4913	TNFRSF12A|28	EQAPGTAPCSR	2	9	Carbamidomethyl@C	28	11	EQAPGTAPCSR	1	30496	30506	0.130609	0.182737	0.116991	-0.097092	0.160004	0.207053	0.132774	-0.163321	30.091	26.23	3.86101	18	6	MGTG
542.269	42.9302	CASP3|29_SGISLDNSYK_2	37.93	47.93	542.27	542.269	542.269	5562	2	27	2629.35	281946	41.2269	47.1946	CASP3|29	SGISLDNSYK	2	NA	NA	15	10	SGISLDNSYK	2	13688	13697	0.116798	0.186034	0.119127	-0.0791506	0.105927	0.176538	0.11298	-0.0881596	43.8225	42.93	0.892451	18	6	MGTG
364.519	25.9378	CENPU|49_RDSDVSSIGR_3	20.94	30.94	364.521	364.519	364.519	1668	3	27	1598.06	9573.35	24.1756	30.1696	CENPU|49	RDSDVSSIGR	3	NA	NA	19	10	RDSDVSSIGR	1	19196	19205	0.0864779	0.140016	0.089431	-0.258816	0.082849	0.136277	0.0870276	-0.258816	26.6343	25.94	0.69427	18	6	MGTG
832.87	52.702	TMEM59|36_EAFDSVLGDTASCHR_2	47.7	57.7	832.871	832.869	832.87	7293	2	27	3082.32	393702	51.057	57.0233	TMEM59|36	EAFDSVLGDTASCHR	2	13	Carbamidomethyl@C	66	15	EAFDSVLGDTASCHR	1	93680	93694	0.0603492	0.103684	0.0661262	-0.398838	0.101115	0.140629	0.0898249	-0.305161	51.3721	52.7	-1.32794	18	6	MGTG
576.587	27.2043	IGFBP4|22_RDEAIHCPPCSEEK_3	22.2	32.2	576.588	576.586	576.587	2596	3	27	1847.51	106168	25.3267	31.3235	IGFBP4|22	RDEAIHCPPCSEEK	3	7;10	Carbamidomethyl@C;Carbamidomethyl@C	62	14	RDEAIHCPPCSEEK	1	84895	84908	0.00408855	0.0568157	0.0361896	-0.0683855	0.0421201	0.0916337	0.0584178	-0.291727	30.7919	27.2	3.59186	18	6	MGTG
329.53	27.6908	MTHFD2|36_REAVVISGR_3	22.69	32.69	329.531	329.529	329.53	2749	3	27	1888.6	28317.2	25.6197	31.5836	MTHFD2|36	REAVVISGR	3	NA	NA	10	9	REAVVISGR	1	9022	9030	0.00239122	0.0809296	0.0515778	-0.27511	0.00015432	0.0783948	0.0499589	-0.194282	31.4767	27.69	3.78673	18	6	MGTG
467.733	29.7107	CENPU|49_NSDVSSIGR_2	24.71	34.71	467.734	467.732	467.733	1940	2	27	1673.07	40935.7	27.8845	33.8298	CENPU|49	NSDVSSIGR	2	NA	NA	11	9	NSDVSSIGR	0	9054	9062	0	0	0	-0.383065	0	0	0	-0.456378	27.8845	29.71	-1.82546	18	6	MGTG
628.299	27.7828	ERO1A|24_EEQPPETAAQR_2	22.78	32.78	628.3	628.298	628.299	1525	2	27	1559.49	34643.1	25.9915	31.9452	ERO1A|24	EEQPPETAAQR	2	NA	NA	22	11	EEQPPETAAQR	0	22076	22086	0	0	0	-0.203189	0	0	0	-0.345122	25.9915	27.78	-1.78852	18	6	MGTG
443.882	22.4798	TNFRSF12A|28_REQAPGTAPCSR_3	17.48	27.48	443.884	443.882	443.883	620	3	27	1284.55	31102.7	21.4091	27.3801	TNFRSF12A|28	REQAPGTAPCSR	3	10	Carbamidomethyl@C	33	12	REQAPGTAPCSR	0	34444	34455	0	0	0	-0.444961	0	0	0	-0.444961	21.4091	22.48	-1.07089	18	6	MGTG
448.569	33.1905	FKBP11|26_REAGLETESPVR_3	28.19	38.19	448.57	448.568	448.569	2643	3	27	1860.36	104643	31.006	36.9924	FKBP11|26	REAGLETESPVR	3	NA	NA	39	12	REAGLETESPVR	0	41990	42001	0	0	0	-0.444961	0	0	0	-0.444961	31.006	33.19	-2.18401	18	6	MGTG
786.327	31.4927	IGFBP4|22_DEAIHCPPCSEEK_2	26.49	36.49	786.328	786.326	786.327	2339	2	27	1779.57	28648.2	29.6596	35.6121	IGFBP4|22	DEAIHCPPCSEEK	2	6;9	Carbamidomethyl@C;Carbamidomethyl@C	54	13	DEAIHCPPCSEEK	0	68069	68081	0	0	0	0.0935193	0	0	0	-0.317846	29.6596	31.49	-1.83044	18	6	MGTG
806.875	19.0125	SHMT2|27_QHSNAAQTQTGEANR_2	14.01	24.01	806.876	806.874	806.875	104	2	27	1111.43	28973.4	18.5238	24.5068	SHMT2|27	QHSNAAQTQTGEANR	2	NA	NA	67	15	QHSNAAQTQTGEANR	0	96158	96172	0	0	0	0.434211	0	0	0	-0.346719	18.5238	19.01	-0.486206	18	6	MGTG
607.616	43.539	TMEM59|36_REAFDSVLGDTASCHR_3	38.54	48.54	607.617	607.615	607.616	5010	3	27	2489.32	2632313	41.4887	47.4269	TMEM59|36	REAFDSVLGDTASCHR	3	14	Carbamidomethyl@C	75	16	REAFDSVLGDTASCHR	0	122913	122928	0	0	0	-0.536538	0	0	0	-0.500528	41.4887	43.54	-2.05128	18	6	MGTG
773.895	53.205	PRTC08_ELGQSGVDTYLQTK_2	48.21	58.21	773.896	773.894	773.895	8434	2	27	3156.75	25874088	51.1761	57.1496	PRTC08	ELGQSGVDTYLQTK	2	14	Label:13C(6)15N(2)@K	56	14	ELGQSGVDTYLQTk	13	79442	79455	0.984631	0.987132	0.89776	0.803808	0.902844	0.919431	0.7427	0.849441	52.6124	53.21	-0.597555	25	12	MOCK
745.392	59.9233	PRTC11_SFANQPLEVVYSK_2	54.92	64.92	745.393	745.391	745.392	9895	2	27	3540.12	69826296	58.0286	64.0045	PRTC11	SFANQPLEVVYSK	2	13	Label:13C(6)15N(2)@K	45	13	SFANQPLEVVYSk	14	58707	58719	0.981039	0.983442	0.883989	0.836138	0.95184	0.958561	0.816087	0.691815	59.002	59.92	-0.918022	25	12	MOCK
682.849	48.3756	SSBP1|17_ESETTTSLVLER_2	43.38	53.38	682.85	682.848	682.849	7202	2	27	2845	5443033	46.5566	52.5088	SSBP1|17	ESETTTSLVLER	2	NA	NA	34	12	ESETTTSLVLER	12	41731	41742	0.946106	0.954564	0.807357	0.593869	0.94115	0.950708	0.799284	0.593869	47.4166	48.38	-0.963388	25	12	MOCK
761.381	51.6026	P4HB|18_DAPEEEDHVLVLR_2	46.6	56.6	761.382	761.38	761.381	7845	2	27	3008.92	2.70172e+06	49.7239	55.6797	P4HB|18	DAPEEEDHVLVLR	2	NA	NA	51	13	DAPEEEDHVLVLR	23	67599	67611	0.941658	0.944715	0.787323	0.424229	0.89906	0.918358	0.74097	0.59124	50.1487	51.6	-1.4513	25	12	MOCK
836.415	69.2789	SQSTM1|421_NYDIGAALDTIQYSK_2	64.28	74.28	836.416	836.414	836.415	12323	2	27	4198.75	12451282	67.0876	73.0841	SQSTM1|421	NYDIGAALDTIQYSK	2	NA	NA	71	15	NYDIGAALDTIQYSK	8	120918	120932	0.936189	0.937788	0.774258	0.277922	0.938405	0.939356	0.777152	0.27177	69.9791	69.28	0.699124	25	12	MOCK
787.421	72.8278	PRTC15_LSSEAPALFQFDLK_2	67.83	77.83	787.422	787.42	787.421	13049	2	27	4386.31	11098338	70.9529	76.9319	PRTC15	LSSEAPALFQFDLK	2	14	Label:13C(6)15N(2)@K	63	14	LSSEAPALFQFDLk	9	94080	94093	0.925527	0.929531	0.759575	0.233629	0.884401	0.889504	0.697899	0.0376932	73.1052	72.83	0.275184	25	12	MOCK
801.411	60.0386	PRTC10_GILFVGSGVSGGEEGAR_2	55.04	65.04	801.412	801.41	801.411	10235	2	27	3627.53	1.9199e+06	58.3427	64.3234	PRTC10	GILFVGSGVSGGEEGAR	2	17	Label:13C(6)15N(4)@R	79	17	GILFVGSGVSGGEEGAr	12	143053	143069	0.92488	0.932585	0.764905	0.792216	0.625923	0.6655	0.463563	0.544299	60.4588	60.04	0.418819	25	12	MOCK
451.283	34.9206	PRTC04_DIPVPKPK_2	29.92	39.92	451.284	451.282	451.283	4514	2	27	2200.36	1.03362e+06	33.2879	39.243	PRTC04	DIPVPKPK	2	8	Label:13C(6)15N(2)@K	2	8	DIPVPKPk	4	1608	1615	0.922516	0.930682	0.761571	0.391626	0.924199	0.932889	0.765442	0.392173	36.6727	34.92	1.75266	25	12	MOCK
680.374	71.767	PRTC14_ELASGLSFPVGFK_2	66.77	76.77	680.375	680.372	680.373	12814	2	27	4323.52	63818500	69.8722	75.8532	PRTC14	ELASGLSFPVGFK	2	13	Label:13C(6)15N(2)@K	48	13	ELASGLSFPVGFk	11	63447	63459	0.920104	0.93187	0.763647	0.638786	0.814897	0.842607	0.63796	0.678734	72.0586	71.77	0.288644	25	12	MOCK
498.802	63.8572	PRTC12_LTILEELR_2	58.86	68.86	498.803	498.801	498.802	11366	2	27	3942.96	208348	61.8039	67.7693	PRTC12	LTILEELR	2	8	Label:13C(6)15N(4)@R	7	8	LTILEELr	6	7509	7516	0.898072	0.914959	0.735554	0.556103	0.52515	0.59827	0.40829	0.122332	65.7161	63.86	1.85608	25	12	MOCK
573.302	67.5684	PRTC13_NGFILDGFPR_2	62.57	72.57	573.303	573.301	573.302	12225	2	27	4174.48	781206	65.8318	71.7979	PRTC13	NGFILDGFPR	2	10	Label:13C(6)15N(4)@R	20	10	NGFILDGFPr	5	23179	23188	0.895501	0.90989	0.727669	0.750708	0.545572	0.580574	0.394344	0.502574	69.5747	67.57	2.00472	25	12	MOCK
542.269	42.9302	CASP3|29_SGISLDNSYK_2	37.93	47.93	542.27	542.269	542.269	6190	2	27	2604.12	2412918	41.1896	47.1485	CASP3|29	SGISLDNSYK	2	NA	NA	15	10	SGISLDNSYK	1	14683	14692	0.889609	0.874569	0.677712	-0.130631	0.88081	0.866172	0.666854	-0.130631	43.4019	42.93	0.471942	25	12	MOCK
496.287	29.929	PRTC03_HVLTSIGEK_2	24.93	34.93	496.288	496.286	496.287	3416	2	27	1925.28	937142	28.0025	33.9864	PRTC03	HVLTSIGEK	2	9	Label:13C(6)15N(2)@K	13	9	HVLTSIGEk	5	12074	12082	0.88631	0.900004	0.712873	0.594025	0.870618	0.88481	0.691423	0.194465	32.0881	29.93	2.15807	25	12	MOCK
628.299	27.7828	ERO1A|24_EEQPPETAAQR_2	22.78	32.78	628.3	628.298	628.299	2344	2	27	1663.3	780354	25.9255	31.896	ERO1A|24	EEQPPETAAQR	2	NA	NA	22	11	EEQPPETAAQR	3	24491	24501	0.885467	0.892065	0.701488	0.203189	0.963073	0.961174	0.822019	0.061257	27.7217	27.78	-0.058285	25	12	MOCK
587.269	26.2323	TNFRSF12A|28_EQAPGTAPCSR_2	21.23	31.23	587.27	587.269	587.269	1854	2	27	1542.82	548433	24.2852	30.2685	TNFRSF12A|28	EQAPGTAPCSR	2	9	Carbamidomethyl@C	28	11	EQAPGTAPCSR	3	31731	31741	0.879523	0.876971	0.68088	0.203377	0.852327	0.855814	0.653887	0.101126	25.7137	26.23	-0.516292	25	12	MOCK
761.368	41.0085	FLNA|1502_NADGTQTVNYVPSR_2	36.01	46.01	761.369	761.367	761.368	5505	2	27	2440.44	674977	39.158	45.143	FLNA|1502	NADGTQTVNYVPSR	2	NA	NA	60	14	NADGTQTVNYVPSR	2	86839	86852	0.849145	0.836477	0.630778	-0.141467	0.840586	0.829089	0.622281	-0.0891744	40.674	41.01	-0.335968	25	12	MOCK
493.768	26.3416	PRTC01_SSAAPPPPPR_2	21.34	31.34	493.769	493.767	493.768	2916	2	27	1800.17	2656857	24.7504	30.716	PRTC01	SSAAPPPPPR	2	10	Label:13C(6)15N(4)@R	18	10	SSAAPPPPPr	4	19687	19696	0.843988	0.860007	0.659082	0.19897	0.657614	0.700292	0.493894	0.262033	30.0029	26.34	3.66286	25	12	MOCK
415.74	33.151	MTHFD2|36_EAVVISGR_2	28.15	38.15	415.741	415.739	415.74	3438	2	27	1931.25	1.06537e+06	31.2539	37.2413	MTHFD2|36	EAVVISGR	2	NA	NA	4	8	EAVVISGR	3	3673	3680	0.836436	0.853273	0.650772	0.221401	0.831337	0.849041	0.64564	0.221401	32.1874	33.15	-0.962554	25	12	MOCK
594.299	39.5989	FKBP11|26_EAGLETESPVR_2	34.6	44.6	594.3	594.298	594.299	5309	2	27	2390.98	1.10539e+06	37.7745	43.7406	FKBP11|26	EAGLETESPVR	2	NA	NA	26	11	EAGLETESPVR	4	27901	27911	0.8363	0.849364	0.646028	0.31651	0.839446	0.852496	0.649824	0.302251	39.8497	39.6	0.249688	25	12	MOCK
760.356	53.4877	BAX|66_IGDELDSNMELQR_2	48.49	58.49	760.357	760.356	760.356	8599	2	27	3198.59	522811	51.5786	57.5308	BAX|66	IGDELDSNMELQR	2	NA	NA	44	13	IGDELDSNMELQR	5	56607	56619	0.830249	0.842773	0.638156	0.0999783	0.824827	0.837862	0.63239	0.095419	53.3099	53.49	-0.180111	25	12	MOCK
471.236	24.3151	ERO1A|24_REEQPPETAAQR_3	19.32	29.32	471.237	471.235	471.236	1543	3	27	1465.37	1.70135e+06	22.2967	28.2906	ERO1A|24	REEQPPETAAQR	3	NA	NA	37	12	REEQPPETAAQR	1	45559	45570	0.828194	0.81346	0.604838	-0.314658	0.827076	0.814501	0.605978	-0.366032	24.4229	24.32	0.102912	25	12	MOCK
867.881	58.2026	HSP90B1|22_DDEVDVDGTVEEDLGK_2	53.2	63.2	867.882	867.88	867.881	9344	2	27	3396.12	591538	56.1661	62.1306	HSP90B1|22	DDEVDVDGTVEEDLGK	2	NA	NA	74	16	DDEVDVDGTVEEDLGK	1	130966	130981	0.811719	0.812577	0.603872	0.564046	0.660557	0.651383	0.451622	-0.19222	56.6021	58.2	-1.59792	25	12	MOCK
558.326	56.6711	PRTC09_GLILVGGYGTR_2	51.67	61.67	558.327	558.325	558.326	10070	2	27	3584.35	11367995	54.8946	60.8616	PRTC09	GLILVGGYGTR	2	11	Label:13C(6)15N(4)@R	29	11	GLILVGGYGTr	4	34801	34811	0.794818	0.813638	0.605032	0.755441	0.793227	0.810612	0.601731	0.460694	59.7392	56.67	3.06918	25	12	MOCK
758.338	44.9663	FBLN1|30_DVLLEACCADGHR_2	39.97	49.97	758.339	758.337	758.338	6266	2	27	2622.53	1.61827e+06	43.1595	49.1325	FBLN1|30	DVLLEACCADGHR	2	7;8	Carbamidomethyl@C;Carbamidomethyl@C	53	13	DVLLEACCADGHR	4	72867	72879	0.789813	0.800897	0.591287	-0.12766	0.808748	0.820149	0.612219	-0.132327	43.7089	44.97	-1.26111	25	12	MOCK
695.832	45.6162	PRTC06_TASEFDSAIAQDK_2	40.62	50.62	695.833	695.831	695.832	6526	2	27	2683.93	13947109	43.4999	49.4544	PRTC06	TASEFDSAIAQDK	2	13	Label:13C(6)15N(2)@K	43	13	TASEFDSAIAQDk	14	54255	54267	0.789707	0.830653	0.624066	0.605243	0.856195	0.880844	0.686049	0.449631	44.7321	45.62	-0.887877	25	12	MOCK
507.602	41.2944	SSBP1|17_RESETTTSLVLER_3	36.29	46.29	507.603	507.601	507.602	6561	3	27	2691.94	1.27442e+06	39.6231	45.6048	SSBP1|17	RESETTTSLVLER	3	NA	NA	49	13	RESETTTSLVLER	2	67203	67215	0.783222	0.777165	0.566686	-0.239687	0.756959	0.755572	0.545282	-0.190838	44.8656	41.29	3.57563	25	12	MOCK
570.276	58.136	PDIA3|26_RDVLELTDDNFESR_3	53.14	63.14	570.277	570.275	570.276	10391	3	27	3669.16	1.67252e+06	56.6789	62.6643	PDIA3|26	RDVLELTDDNFESR	3	NA	NA	65	14	RDVLELTDDNFESR	1	101269	101282	0.775623	0.755985	0.545683	-0.248186	0.777842	0.757788	0.54744	-0.344019	61.1526	58.14	3.01262	25	12	MOCK
427.226	43.2527	CALR|18_EPAVYFK_2	38.25	48.25	427.227	427.225	427.226	5781	2	27	2509.24	3833791	41.8206	47.7602	CALR|18	EPAVYFK	2	NA	NA	1	7	EPAVYFK	5	0	6	0.761399	0.799796	0.590118	0.766957	0.773862	0.809559	0.600588	0.786087	41.8206	43.25	-1.42939	25	12	MOCK
752.854	54.3255	HSP90B1|24_EVDVDGTVEEDLGK_2	49.33	59.33	752.855	752.853	752.854	9450	2	27	3423.63	7.23962e+06	52.2613	58.2186	HSP90B1|24	EVDVDGTVEEDLGK	2	NA	NA	57	14	EVDVDGTVEEDLGK	3	83498	83511	0.756703	0.759413	0.549028	0.163536	0.689247	0.694808	0.489021	0.0350038	57.0606	54.33	2.73058	25	12	MOCK
560.276	37.7312	FLNA|1502_RDADGTQTVNYVPSR_3	32.73	42.73	560.277	560.275	560.276	4583	3	27	2216.18	1.23916e+06	35.8999	41.8883	FLNA|1502	RDADGTQTVNYVPSR	3	NA	NA	70	15	RDADGTQTVNYVPSR	1	117250	117264	0.746026	0.728267	0.519348	-0.376282	0.740547	0.726224	0.517453	-0.290123	36.9363	37.73	-0.793725	25	12	MOCK
422.736	38.5693	PRTC05_IGDYAGIK_2	33.57	43.57	422.737	422.735	422.736	4897	2	27	2290.95	11131763	36.7489	42.6996	PRTC05	IGDYAGIK	2	8	Label:13C(6)15N(2)@K	6	8	IGDYAGIk	7	5094	5101	0.745236	0.779913	0.569474	0.547072	0.201046	0.329898	0.214028	0.531199	38.1825	38.57	-0.38754	25	12	MOCK
613.317	30.6463	PRTC02_GISNEGQNASIK_2	25.65	35.65	613.318	613.316	613.317	3114	2	27	1847.14	2.06446e+06	28.8078	34.7482	PRTC02	GISNEGQNASIK	2	12	Label:13C(6)15N(2)@K	40	12	GISNEGQNASIk	10	49893	49904	0.740461	0.780546	0.570118	0.559901	0.569877	0.622617	0.427861	0.264975	30.7856	30.65	0.135604	25	12	MOCK
818.891	39.83	ENG|26_ETVHCDLQPVGPER_2	34.83	44.83	818.892	818.89	818.891	5078	2	27	2332.76	204163	37.9764	43.9355	ENG|26	ETVHCDLQPVGPER	2	5	Carbamidomethyl@C	58	14	ETVHCDLQPVGPER	4	84421	84434	0.722603	0.739142	0.529537	-0.106719	0.80918	0.813813	0.605224	-0.106634	38.8793	39.83	-0.950748	25	12	MOCK
584.304	60.3621	P4HA3|29_DTFSALTSVAR_2	55.36	65.36	584.305	584.303	584.304	10494	2	27	3695.83	1.99342e+06	58.449	64.4225	P4HA3|29	DTFSALTSVAR	2	NA	NA	27	11	DTFSALTSVAR	4	29901	29911	0.697772	0.73128	0.522153	0.189493	0.703485	0.736243	0.526804	0.128236	61.5972	60.36	1.2372	25	12	MOCK
586.8	46.4127	PRTC07_SAAGAFGPELSR_2	41.41	51.41	586.801	586.799	586.8	7181	2	27	2839.58	1.24484e+06	44.5105	50.4802	PRTC07	SAAGAFGPELSR	2	12	Label:13C(6)15N(4)@R	32	12	SAAGAFGPELSr	9	35923	35934	0.694184	0.733252	0.523996	0.492107	0.355781	0.432715	0.284889	0.415151	47.3264	46.41	0.916416	25	12	MOCK
554.272	47.8065	HSP90B1|24_REVDVDGTVEEDLGK_3	42.81	52.81	554.273	554.271	554.272	7909	3	27	3024.66	3.41739e+06	45.8493	51.815	HSP90B1|24	REVDVDGTVEEDLGK	3	NA	NA	68	15	REVDVDGTVEEDLGK	2	113582	113596	0.639351	0.636392	0.439148	-0.00980866	0.615846	0.613282	0.420302	-0.165824	50.411	47.81	2.601	25	12	MOCK
598.297	34.4875	ENG|26_RETVHCDLQPVGPER_3	29.49	39.49	598.298	598.296	598.297	3616	3	27	1977.24	988906	32.8344	38.825	ENG|26	RETVHCDLQPVGPER	3	6	Carbamidomethyl@C	69	15	RETVHCDLQPVGPER	2	114296	114310	0.583472	0.600643	0.410177	-0.324607	0.726764	0.730839	0.521742	-0.364115	32.9541	34.49	-1.53595	25	12	MOCK
337.187	35.4809	CALR|18_REPAVYFK_3	30.48	40.48	337.188	337.186	337.187	3777	3	27	2017.29	299225	33.6215	39.6091	CALR|18	REPAVYFK	3	NA	NA	3	8	REPAVYFK	1	2168	2175	0.576975	0.58882	0.400815	-0.35769	0.511381	0.532973	0.357851	-0.134647	33.6215	35.48	-1.85854	25	12	MOCK
576.587	27.2043	IGFBP4|22_RDEAIHCPPCSEEK_3	22.2	32.2	576.588	576.586	576.587	3255	3	27	1883.04	1.04757e+06	25.4726	31.4625	IGFBP4|22	RDEAIHCPPCSEEK	3	7;10	Carbamidomethyl@C;Carbamidomethyl@C	62	14	RDEAIHCPPCSEEK	1	93105	93118	0.570795	0.575314	0.390241	-0.0248442	0.614926	0.615671	0.42223	-0.248186	31.384	27.2	4.18397	25	12	MOCK
329.53	27.6908	MTHFD2|36_REAVVISGR_3	22.69	32.69	329.531	329.529	329.53	1932	3	27	1563.19	1.15267e+06	25.702	31.6427	MTHFD2|36	REAVVISGR	3	NA	NA	10	9	REAVVISGR	1	8234	8242	0.550791	0.564065	0.381527	-0.218292	0.543374	0.557813	0.376719	-0.137463	26.0531	27.69	-1.63687	25	12	MOCK
764.835	69.703	ATF4|76_EDAFSGTDWMLEK_2	64.7	74.7	764.836	764.834	764.835	12993	2	27	4371.65	8773206	67.5013	73.4714	ATF4|76	EDAFSGTDWMLEK	2	NA	NA	42	13	EDAFSGTDWMLEK	2	53595	53607	0.550642	0.570351	0.386386	0.0286583	0.541301	0.561177	0.379303	0.0236648	72.8608	69.7	3.16081	25	12	MOCK
776.86	67.1829	PDIA3|26_DVLELTDDNFESR_2	62.18	72.18	776.861	776.859	776.86	12442	2	27	4228.38	2.20159e+06	65.2834	71.2615	PDIA3|26	DVLELTDDNFESR	2	NA	NA	52	13	DVLELTDDNFESR	2	72435	72447	0.545632	0.563974	0.381456	0.0285497	0.551311	0.568354	0.384839	-0.0933022	70.4731	67.18	3.29307	25	12	MOCK
607.616	43.539	TMEM59|36_REAFDSVLGDTASCHR_3	38.54	48.54	607.617	607.615	607.616	5912	3	27	2538.74	11843863	41.7752	47.7514	TMEM59|36	REAFDSVLGDTASCHR	3	14	Carbamidomethyl@C	75	16	REAFDSVLGDTASCHR	1	133861	133876	0.539677	0.538925	0.362339	-0.439817	0.532764	0.534776	0.359208	-0.403807	42.3123	43.54	-1.22767	25	12	MOCK
448.569	33.1905	FKBP11|26_REAGLETESPVR_3	28.19	38.19	448.57	448.568	448.569	4341	3	27	2158.65	3.53231e+06	31.3341	37.3088	FKBP11|26	REAGLETESPVR	3	NA	NA	39	12	REAGLETESPVR	1	48826	48837	0.514834	0.522799	0.350224	-0.314658	0.524344	0.532346	0.357379	-0.314658	35.9774	33.19	2.78743	25	12	MOCK
702.834	41.5014	CPSF7|33_DVLTATSQPSDDR_2	36.5	46.5	702.835	702.833	702.834	5984	2	27	2555.31	1.03968e+06	39.6208	45.5685	CPSF7|33	DVLTATSQPSDDR	2	NA	NA	46	13	DVLTATSQPSDDR	1	61719	61731	0.487203	0.497561	0.331542	-0.0147091	0.488806	0.498812	0.33246	-0.197948	42.5885	41.5	1.08848	25	12	MOCK
467.733	29.7107	CENPU|49_NSDVSSIGR_2	24.71	34.71	467.734	467.732	467.733	3391	2	27	1918.44	253597	27.8653	33.8252	CENPU|49	NSDVSSIGR	2	NA	NA	11	9	NSDVSSIGR	1	10602	10610	0.481867	0.502422	0.335116	-0.218292	0.446961	0.471708	0.312724	-0.291606	31.974	29.71	2.26404	25	12	MOCK
605.827	72.7819	BCL2|130_FATVVEELFR_2	67.78	77.78	605.828	605.826	605.827	12974	2	27	4366.45	1.01473e+06	70.8284	76.8012	BCL2|130	FATVVEELFR	2	NA	NA	16	10	FATVVEELFR	2	16105	16114	0.391599	0.44114	0.290851	-0.168082	0.344198	0.399559	0.261674	-0.117761	72.7742	72.78	-0.005754	25	12	MOCK
557.928	36.8535	FBLN1|30_RDVLLEACCADGHR_3	31.85	41.85	557.929	557.927	557.928	4431	3	27	2180.62	2.65568e+06	35.2943	41.2518	FBLN1|30	RDVLLEACCADGHR	3	8;9	Carbamidomethyl@C;Carbamidomethyl@C	64	14	RDVLLEACCADGHR	1	97434	97447	0.340898	0.361777	0.23566	-0.516136	0.373044	0.390944	0.255702	-0.507428	36.3437	36.85	-0.506257	25	12	MOCK
496.295	48.7357	ERN1|280_LTPTLYVGK_2	43.74	53.74	496.296	496.294	496.295	7710	2	27	2974.08	1.22757e+06	46.8143	52.7979	ERN1|280	LTPTLYVGK	2	NA	NA	14	9	LTPTLYVGK	2	13322	13330	0.281675	0.348844	0.226852	-0.0976906	0.512214	0.548347	0.369485	-0.00513196	49.568	48.74	0.827969	25	12	MOCK
557.299	44.2714	PLA2R1|21_EGVAAALTPER_2	39.27	49.27	557.3	557.298	557.299	6429	2	27	2660.89	6216442	42.3312	48.2828	PLA2R1|21	EGVAAALTPER	2	NA	NA	23	11	EGVAAALTPER	1	26221	26231	0.268686	0.308366	0.199564	-0.163321	0.28793	0.325186	0.210854	-0.231707	44.3481	44.27	0.07814	25	12	MOCK
520.925	34.7462	CPSF7|33_RDVLTATSQPSDDR_3	29.75	39.75	520.926	520.924	520.925	3669	3	27	1990.26	1.48981e+06	33.0421	39.0057	CPSF7|33	RDVLTATSQPSDDR	3	NA	NA	61	14	RDVLTATSQPSDDR	1	88373	88386	0.257801	0.288584	0.186369	-0.348374	0.289306	0.317235	0.205509	-0.301887	33.171	34.75	-1.579	25	12	MOCK
794.019	50.9195	EIF4B|46_RDLEGDVSTTWHSNDDDVYR_3	45.92	55.92	794.02	794.018	794.019	8237	3	27	3107.11	1.01769e+06	49.4768	55.4484	EIF4B|46	RDLEGDVSTTWHSNDDDVYR	3	NA	NA	83	20	RDLEGDVSTTWHSNDDDVYR	3	146829	146848	0.218727	0.274403	0.17696	-0.162912	0.256969	0.308323	0.199535	-0.164293	51.7852	50.92	0.865236	25	12	MOCK
364.519	25.9378	CENPU|49_RDSDVSSIGR_3	20.94	30.94	364.521	364.519	364.519	2126	3	27	1610.8	668725	24.2115	30.1942	CENPU|49	RDSDVSSIGR	3	NA	NA	19	10	RDSDVSSIGR	1	20902	20911	0.2163	0.259267	0.166962	-0.22278	0.211862	0.254933	0.164107	-0.213771	26.8467	25.94	0.90665	25	12	MOCK
630.957	51.6242	HSP90B1|22_RDDEVDVDGTVEEDLGK_3	46.62	56.62	630.958	630.956	630.957	7812	3	27	3000.29	5968073	49.7588	55.7225	HSP90B1|22	RDDEVDVDGTVEEDLGK	3	NA	NA	77	17	RDDEVDVDGTVEEDLGK	2	136029	136045	0.197636	0.244008	0.156925	-0.186676	0.201915	0.250376	0.161109	-0.281479	50.0048	51.62	-1.61524	25	12	MOCK
443.882	22.4798	TNFRSF12A|28_REQAPGTAPCSR_3	17.48	27.48	443.884	443.882	443.883	1437	3	27	1432.96	1.09085e+06	20.3784	26.3675	TNFRSF12A|28	REQAPGTAPCSR	3	10	Carbamidomethyl@C	33	12	REQAPGTAPCSR	1	40103	40114	0.149599	0.194427	0.12457	-0.33284	0.181997	0.224736	0.144304	-0.326779	23.8826	22.48	1.40263	25	12	MOCK
681.355	58.8019	LSM3|7_REQQTTNTVEEPLDLIR_3	53.8	63.8	681.356	681.354	681.355	9794	3	27	3516.43	2.78956e+06	56.6572	62.6372	LSM3|7	REQQTTNTVEEPLDLIR	3	NA	NA	78	17	REQQTTNTVEEPLDLIR	2	140061	140077	0.0952614	0.155245	0.0992333	-0.370261	0.084523	0.143848	0.0918956	-0.333631	58.6072	58.8	-0.192786	25	12	MOCK
559.957	43.3358	P4HB|18_RDAPEEEDHVLVLR_3	38.34	48.34	559.958	559.956	559.957	6323	3	27	2635.89	5194233	41.6569	47.6356	P4HB|18	RDAPEEEDHVLVLR	3	NA	NA	55	14	RDAPEEEDHVLVLR	1	77674	77687	0.0651015	0.121121	0.0772977	-0.537907	-0.00713663	0.0530812	0.0338085	-0.528131	43.9316	43.34	0.591554	25	12	MOCK
832.87	52.702	TMEM59|36_EAFDSVLGDTASCHR_2	47.7	57.7	832.871	832.869	832.87	8308	2	27	3125.1	575288	50.8488	56.8208	TMEM59|36	EAFDSVLGDTASCHR	2	13	Carbamidomethyl@C	66	15	EAFDSVLGDTASCHR	1	102424	102438	0.0603492	0.103684	0.0661262	-0.398838	0.101115	0.140629	0.0898249	-0.305161	52.0849	52.7	-0.615059	25	12	MOCK
786.327	31.4927	IGFBP4|22_DEAIHCPPCSEEK_2	26.49	36.49	786.328	786.326	786.327	2851	2	27	1784.82	136550	29.747	35.7208	IGFBP4|22	DEAIHCPPCSEEK	2	6;9	Carbamidomethyl@C;Carbamidomethyl@C	54	13	DEAIHCPPCSEEK	0	74715	74727	0	0	0	0.0935193	0	0	0	-0.317846	29.747	31.49	-1.74302	25	12	MOCK
806.875	19.0125	SHMT2|27_QHSNAAQTQTGEANR_2	14.01	24.01	806.876	806.874	806.875	136	2	27	1016.95	16338.3	16.9492	22.931	SHMT2|27	QHSNAAQTQTGEANR	2	NA	NA	67	15	QHSNAAQTQTGEANR	0	104622	104636	0	0	0	0.434211	0	0	0	-0.346719	16.9492	19.01	-2.06079	25	12	MOCK
590.614	17.8991	SHMT2|27_REHSNAAQTQTGEANR_3	12.9	22.9	590.615	590.613	590.614	1	3	27	959.656	21357.6	15.9943	21.9902	SHMT2|27	REHSNAAQTQTGEANR	3	NA	NA	73	16	REHSNAAQTQTGEANR	0	122416	122431	0	0	0	-0.0196999	0	0	0	-0.500528	15.9943	17.9	-1.90573	25	12	MOCK
848.393	68.08	UQCRHL|15_RDPEEEEEEEEELVDPLTTVR_3	63.08	73.08	848.394	848.392	848.393	11447	3	27	3965.26	2.09086e+06	66.0644	72.0449	UQCRHL|15	RDPEEEEEEEEELVDPLTTVR	3	NA	NA	84	21	RDPEEEEEEEEELVDPLTTVR	0	149034	149054	0	0	0	0.238514	0	0	0	-0.429372	66.0876	68.08	-1.99239	25	12	MOCK
836.415	69.2789	SQSTM1|421_NYDIGAALDTIQYSK_2	64.28	74.28	836.416	836.414	836.415	12168	2	27	4167.22	25219462	67.0859	73.0711	SQSTM1|421	NYDIGAALDTIQYSK	2	NA	NA	71	15	NYDIGAALDTIQYSK	18	120151	120165	0.986767	0.988679	0.904114	0.825256	0.983365	0.985755	0.892417	0.813773	69.4537	69.28	0.173744	26	12	MOCK
745.392	59.9233	PRTC11_SFANQPLEVVYSK_2	54.92	64.92	745.393	745.391	745.392	9748	2	27	3515.72	82791208	58.0324	63.9926	PRTC11	SFANQPLEVVYSK	2	13	Label:13C(6)15N(2)@K	45	13	SFANQPLEVVYSk	15	57816	57828	0.984338	0.986643	0.895833	0.915545	0.961081	0.966913	0.835779	0.786854	58.5954	59.92	-1.32459	26	12	MOCK
773.895	53.205	PRTC08_ELGQSGVDTYLQTK_2	48.21	58.21	773.896	773.894	773.895	8307	2	27	3138.83	41971660	51.1778	57.1684	PRTC08	ELGQSGVDTYLQTK	2	14	Label:13C(6)15N(2)@K	56	14	ELGQSGVDTYLQTk	14	78711	78724	0.982633	0.985555	0.891664	0.741398	0.905341	0.921832	0.746615	0.664774	52.3138	53.21	-0.896192	26	12	MOCK
628.299	27.7828	ERO1A|24_EEQPPETAAQR_2	22.78	32.78	628.3	628.298	628.299	2275	2	27	1664.58	125268	25.9195	31.8884	ERO1A|24	EEQPPETAAQR	2	NA	NA	22	11	EEQPPETAAQR	5	24069	24079	0.963716	0.967418	0.837044	0.439869	0.908252	0.917895	0.740225	0.283677	27.7431	27.78	-0.036921	26	12	MOCK
682.849	48.3756	SSBP1|17_ESETTTSLVLER_2	43.38	53.38	682.85	682.848	682.849	7019	2	27	2819.86	5953957	46.5666	52.5308	SSBP1|17	ESETTTSLVLER	2	NA	NA	34	12	ESETTTSLVLER	11	40892	40903	0.951794	0.959812	0.818905	0.819521	0.94421	0.953817	0.805767	0.819521	46.9977	48.38	-1.38233	26	12	MOCK
761.381	51.6026	P4HB|18_DAPEEEDHVLVLR_2	46.6	56.6	761.382	761.38	761.381	7752	2	27	3000.13	1.58456e+06	49.7096	55.7013	P4HB|18	DAPEEEDHVLVLR	2	NA	NA	51	13	DAPEEEDHVLVLR	14	66852	66864	0.943083	0.949385	0.796585	0.403116	0.876952	0.89118	0.700244	0.355515	50.0021	51.6	-1.59788	26	12	MOCK
801.411	60.0386	PRTC10_GILFVGSGVSGGEEGAR_2	55.04	65.04	801.412	801.41	801.411	10240	2	27	3642.15	1.34494e+06	58.3428	64.3111	PRTC10	GILFVGSGVSGGEEGAR	2	17	Label:13C(6)15N(4)@R	79	17	GILFVGSGVSGGEEGAr	12	142874	142890	0.924615	0.931981	0.763842	0.67326	0.61175	0.652026	0.452162	0.425389	60.7025	60.04	0.662451	26	12	MOCK
787.421	72.8278	PRTC15_LSSEAPALFQFDLK_2	67.83	77.83	787.422	787.42	787.421	13050	2	27	4396.54	3.29972e+06	70.9432	76.931	PRTC15	LSSEAPALFQFDLK	2	14	Label:13C(6)15N(2)@K	63	14	LSSEAPALFQFDLk	1	93479	93492	0.923545	0.910642	0.728825	-0.195893	0.856685	0.84061	0.635607	-0.14057	73.2757	72.83	0.445739	26	12	MOCK
680.374	71.767	PRTC14_ELASGLSFPVGFK_2	66.77	76.77	680.375	680.372	680.373	12685	2	27	4299.46	126879350	69.8633	75.8434	PRTC14	ELASGLSFPVGFK	2	13	Label:13C(6)15N(2)@K	48	13	ELASGLSFPVGFk	13	62580	62592	0.922198	0.93399	0.767394	0.634173	0.814798	0.842821	0.638213	0.675749	71.6577	71.77	-0.112289	26	12	MOCK
498.802	63.8572	PRTC12_LTILEELR_2	58.86	68.86	498.803	498.801	498.802	10531	2	27	3717.21	1.26376e+06	61.8132	67.7762	PRTC12	LTILEELR	2	8	Label:13C(6)15N(4)@R	7	8	LTILEELr	6	6177	6184	0.91809	0.927146	0.755492	0.53202	0.553781	0.618783	0.424748	0.146415	61.9535	63.86	-1.90649	26	12	MOCK
451.283	34.9206	PRTC04_DIPVPKPK_2	29.92	39.92	451.284	451.282	451.283	4479	2	27	2214.03	997439	33.2563	39.2484	PRTC04	DIPVPKPK	2	8	Label:13C(6)15N(2)@K	2	8	DIPVPKPk	4	1704	1711	0.911941	0.9183	0.740875	0.327586	0.933563	0.939004	0.776499	0.339628	36.9006	34.92	1.98058	26	12	MOCK
758.338	44.9663	FBLN1|30_DVLLEACCADGHR_2	39.97	49.97	758.339	758.337	758.338	6074	2	27	2596.84	1.12084e+06	43.1538	49.1327	FBLN1|30	DVLLEACCADGHR	2	7;8	Carbamidomethyl@C;Carbamidomethyl@C	53	13	DVLLEACCADGHR	8	72084	72096	0.910805	0.917568	0.739701	0.193443	0.909829	0.919052	0.742088	0.211246	43.2806	44.97	-1.68937	26	12	MOCK
573.302	67.5684	PRTC13_NGFILDGFPR_2	62.57	72.57	573.303	573.301	573.302	12185	2	27	4171.85	320974	65.8256	71.8158	PRTC13	NGFILDGFPR	2	10	Label:13C(6)15N(4)@R	20	10	NGFILDGFPr	5	22789	22798	0.908051	0.920689	0.744745	0.750965	0.580114	0.611839	0.41914	0.502317	69.5309	67.57	1.96089	26	12	MOCK
761.368	41.0085	FLNA|1502_NADGTQTVNYVPSR_2	36.01	46.01	761.369	761.367	761.368	5323	2	27	2415.91	5.27836e+06	39.1666	45.1356	FLNA|1502	NADGTQTVNYVPSR	2	NA	NA	60	14	NADGTQTVNYVPSR	5	86095	86108	0.905002	0.907129	0.723462	0.137369	0.886254	0.89071	0.699584	0.185392	40.2651	41.01	-0.744875	26	12	MOCK
818.891	39.83	ENG|26_ETVHCDLQPVGPER_2	34.83	44.83	818.892	818.89	818.891	4921	2	27	2314.43	245839	37.9537	43.9408	ENG|26	ETVHCDLQPVGPER	2	5	Carbamidomethyl@C	58	14	ETVHCDLQPVGPER	4	83716	83729	0.888402	0.887517	0.695143	-0.0408094	0.859712	0.861411	0.660837	-0.0365406	38.5739	39.83	-1.25609	26	12	MOCK
584.304	60.3621	P4HA3|29_DTFSALTSVAR_2	55.36	65.36	584.305	584.303	584.304	10408	2	27	3684.98	2.97357e+06	58.4426	64.4252	P4HA3|29	DTFSALTSVAR	2	NA	NA	27	11	DTFSALTSVAR	4	29379	29389	0.861832	0.872769	0.675356	0.250094	0.867169	0.877706	0.681854	0.181332	61.4164	60.36	1.05638	26	12	MOCK
594.299	39.5989	FKBP11|26_EAGLETESPVR_2	34.6	44.6	594.3	594.298	594.299	5132	2	27	2368.73	1.06607e+06	37.7567	43.7492	FKBP11|26	EAGLETESPVR	2	NA	NA	26	11	EAGLETESPVR	6	27299	27309	0.857532	0.876842	0.680708	0.515854	0.853867	0.873761	0.676652	0.488461	39.4788	39.6	-0.121205	26	12	MOCK
760.356	53.4877	BAX|66_IGDELDSNMELQR_2	48.49	58.49	760.357	760.356	760.356	8486	2	27	3184.26	1.54929e+06	51.5654	57.5296	BAX|66	IGDELDSNMELQR	2	NA	NA	44	13	IGDELDSNMELQR	6	55752	55764	0.84654	0.852474	0.649797	0.145462	0.840188	0.846648	0.642766	0.140903	53.0709	53.49	-0.419062	26	12	MOCK
496.287	29.929	PRTC03_HVLTSIGEK_2	24.93	34.93	496.288	496.286	496.287	2897	2	27	1824.77	1.12701e+06	28	33.9693	PRTC03	HVLTSIGEK	2	9	Label:13C(6)15N(2)@K	13	9	HVLTSIGEk	5	11603	11611	0.830542	0.847677	0.643999	0.294172	0.806673	0.825784	0.618534	-0.0782624	30.4128	29.93	0.482805	26	12	MOCK
493.768	26.3416	PRTC01_SSAAPPPPPR_2	21.34	31.34	493.769	493.767	493.768	2182	2	27	1639.4	309106	24.7441	30.7222	PRTC01	SSAAPPPPPR	2	10	Label:13C(6)15N(4)@R	18	10	SSAAPPPPPr	4	18829	18838	0.811295	0.832808	0.626536	0.189447	0.620807	0.669274	0.46679	0.25251	27.3233	26.34	0.983285	26	12	MOCK
695.832	45.6162	PRTC06_TASEFDSAIAQDK_2	40.62	50.62	695.833	695.831	695.832	6334	2	27	2656.65	17271504	43.4724	49.4618	PRTC06	TASEFDSAIAQDK	2	13	Label:13C(6)15N(2)@K	43	13	TASEFDSAIAQDk	16	53340	53352	0.789808	0.830223	0.623574	0.491207	0.869892	0.892042	0.701455	0.335161	44.2775	45.62	-1.34247	26	12	MOCK
558.326	56.6711	PRTC09_GLILVGGYGTR_2	51.67	61.67	558.327	558.325	558.326	10171	2	27	3624.18	2.30633e+06	54.8967	60.85	PRTC09	GLILVGGYGTR	2	11	Label:13C(6)15N(4)@R	29	11	GLILVGGYGTr	3	34339	34349	0.776892	0.792584	0.58253	0.640619	0.762243	0.779259	0.568809	0.352627	60.403	56.67	3.733	26	12	MOCK
542.269	42.9302	CASP3|29_SGISLDNSYK_2	37.93	47.93	542.27	542.269	542.269	5966	2	27	2571.11	4.64687e+06	41.2037	47.1645	CASP3|29	SGISLDNSYK	2	NA	NA	15	10	SGISLDNSYK	2	14518	14527	0.763911	0.776045	0.565554	-0.00810814	0.749764	0.763199	0.552745	-0.0168598	42.8518	42.93	-0.078195	26	12	MOCK
613.317	30.6463	PRTC02_GISNEGQNASIK_2	25.65	35.65	613.318	613.316	613.317	2979	2	27	1845.49	1.64283e+06	28.7876	34.7709	PRTC02	GISNEGQNASIK	2	12	Label:13C(6)15N(2)@K	40	12	GISNEGQNASIk	9	49065	49076	0.744466	0.783832	0.573476	0.4642	0.566381	0.619545	0.425366	0.529246	30.7582	30.65	0.108153	26	12	MOCK
422.736	38.5693	PRTC05_IGDYAGIK_2	33.57	43.57	422.737	422.735	422.736	4674	2	27	2256.66	24657136	36.7523	42.7284	PRTC05	IGDYAGIK	2	8	Label:13C(6)15N(2)@K	6	8	IGDYAGIk	8	5099	5106	0.744433	0.781585	0.571177	0.633552	0.199265	0.332441	0.215744	0.410235	37.6109	38.57	-0.959078	26	12	MOCK
752.854	54.3255	HSP90B1|24_EVDVDGTVEEDLGK_2	49.33	59.33	752.855	752.853	752.854	9350	2	27	3411.98	6826948	52.2448	58.2223	HSP90B1|24	EVDVDGTVEEDLGK	2	NA	NA	57	14	EVDVDGTVEEDLGK	2	82806	82819	0.695064	0.696369	0.490405	0.069154	0.65076	0.651744	0.451924	-0.0594639	56.8663	54.33	2.53628	26	12	MOCK
586.8	46.4127	PRTC07_SAAGAFGPELSR_2	41.41	51.41	586.801	586.799	586.8	6944	2	27	2801.44	2.05468e+06	44.5057	50.4804	PRTC07	SAAGAFGPELSR	2	12	Label:13C(6)15N(4)@R	32	12	SAAGAFGPELSr	13	35106	35117	0.690885	0.736721	0.527254	0.478717	0.346009	0.432126	0.284473	0.439253	46.6907	46.41	0.280673	26	12	MOCK
337.187	35.4809	CALR|18_REPAVYFK_3	30.48	40.48	337.188	337.186	337.187	3937	3	27	2087.54	567155	33.6226	39.5949	CALR|18	REPAVYFK	3	NA	NA	3	8	REPAVYFK	2	2460	2467	0.656861	0.676092	0.472656	-0.201149	0.591015	0.620501	0.426142	0.0218938	34.7923	35.48	-0.687658	26	12	MOCK
507.602	41.2944	SSBP1|17_RESETTTSLVLER_3	36.29	46.29	507.603	507.601	507.602	6326	3	27	2654.82	2.35285e+06	39.6367	45.6	SSBP1|17	RESETTTSLVLER	3	NA	NA	49	13	RESETTTSLVLER	1	66312	66324	0.644106	0.635765	0.43863	-0.354538	0.61643	0.612613	0.419763	-0.305688	44.247	41.29	2.95698	26	12	MOCK
415.74	33.151	MTHFD2|36_EAVVISGR_2	28.15	38.15	415.741	415.739	415.74	3201	2	27	1903.84	700562	31.2728	37.2212	MTHFD2|36	EAVVISGR	2	NA	NA	4	8	EAVVISGR	1	3636	3643	0.638467	0.645816	0.446965	-0.119869	0.64703	0.653539	0.453433	-0.119869	31.7306	33.15	-1.41936	26	12	MOCK
554.272	47.8065	HSP90B1|24_REVDVDGTVEEDLGK_3	42.81	52.81	554.273	554.271	554.272	7360	3	27	2901.69	1.19693e+06	45.8722	51.8089	HSP90B1|24	REVDVDGTVEEDLGK	3	NA	NA	68	15	REVDVDGTVEEDLGK	1	111891	111905	0.63066	0.625538	0.430241	-0.0873206	0.605321	0.600671	0.4102	-0.243336	48.3614	47.81	0.55143	26	12	MOCK
681.355	58.8019	LSM3|7_REQQTTNTVEEPLDLIR_3	53.8	63.8	681.356	681.354	681.355	10087	3	27	3602.22	6.66963e+06	56.6764	62.6408	LSM3|7	REQQTTNTVEEPLDLIR	3	NA	NA	78	17	REQQTTNTVEEPLDLIR	1	140442	140458	0.610216	0.603986	0.412844	-0.395627	0.606248	0.602154	0.411381	-0.358997	60.0369	58.8	1.23694	26	12	MOCK
764.835	69.703	ATF4|76_EDAFSGTDWMLEK_2	64.7	74.7	764.836	764.834	764.835	12738	2	27	4312.67	6927566	67.4773	73.4556	ATF4|76	EDAFSGTDWMLEK	2	NA	NA	42	13	EDAFSGTDWMLEK	2	52380	52392	0.570412	0.592042	0.403356	0.0286583	0.552804	0.575652	0.390504	0.0236648	71.8779	69.7	2.1779	26	12	MOCK
776.86	67.1829	PDIA3|26_DVLELTDDNFESR_2	62.18	72.18	776.861	776.859	776.86	12341	2	27	4211.84	2.50562e+06	65.2831	71.2455	PDIA3|26	DVLELTDDNFESR	2	NA	NA	52	13	DVLELTDDNFESR	2	71640	71652	0.567829	0.585646	0.398319	0.0285497	0.576374	0.592519	0.403733	-0.0933022	70.1974	67.18	3.01739	26	12	MOCK
427.226	43.2527	CALR|18_EPAVYFK_2	38.25	48.25	427.227	427.225	427.226	7109	2	27	2841.49	2.16944e+06	41.7844	47.7742	CALR|18	EPAVYFK	2	NA	NA	1	7	EPAVYFK	3	834	840	0.564025	0.62779	0.43208	0.0856522	0.584123	0.643545	0.445074	0.103913	47.3582	43.25	4.10821	26	12	MOCK
329.53	27.6908	MTHFD2|36_REAVVISGR_3	22.69	32.69	329.531	329.529	329.53	2793	3	27	1798.99	705006	25.684	31.6732	MTHFD2|36	REAVVISGR	3	NA	NA	10	9	REAVVISGR	1	9275	9283	0.5508	0.564073	0.381533	-0.206928	0.543374	0.557813	0.376719	-0.1261	29.9832	27.69	2.29324	26	12	MOCK
448.569	33.1905	FKBP11|26_REAGLETESPVR_3	28.19	38.19	448.57	448.568	448.569	4146	3	27	2138.01	1.577e+06	31.3271	37.3137	FKBP11|26	REAGLETESPVR	3	NA	NA	39	12	REAGLETESPVR	2	47877	47888	0.545407	0.571758	0.387477	-0.208104	0.551293	0.577474	0.391923	-0.214024	35.6335	33.19	2.44348	26	12	MOCK
607.616	43.539	TMEM59|36_REAFDSVLGDTASCHR_3	38.54	48.54	607.617	607.615	607.616	6089	3	27	2600	2.40133e+06	41.7769	47.7667	TMEM59|36	REAFDSVLGDTASCHR	3	14	Carbamidomethyl@C	75	16	REAFDSVLGDTASCHR	1	133867	133882	0.539677	0.538925	0.362339	-0.439817	0.532764	0.534776	0.359208	-0.403807	43.3334	43.54	-0.206607	26	12	MOCK
867.881	58.2026	HSP90B1|22_DDEVDVDGTVEEDLGK_2	53.2	63.2	867.882	867.88	867.881	10206	2	27	3633.29	1.69971e+06	56.1624	62.1452	HSP90B1|22	DDEVDVDGTVEEDLGK	2	NA	NA	74	16	DDEVDVDGTVEEDLGK	1	132532	132547	0.496189	0.508617	0.339686	0.560767	0.373005	0.390517	0.255408	-0.195499	60.5549	58.2	2.35487	26	12	MOCK
702.834	41.5014	CPSF7|33_DVLTATSQPSDDR_2	36.5	46.5	702.835	702.833	702.834	5619	2	27	2488.53	3.76541e+06	39.6035	45.5605	CPSF7|33	DVLTATSQPSDDR	2	NA	NA	46	13	DVLTATSQPSDDR	1	60660	60672	0.487203	0.497561	0.331542	-0.0147091	0.488806	0.498812	0.33246	-0.197948	41.4755	41.5	-0.024473	26	12	MOCK
605.827	72.7819	BCL2|130_FATVVEELFR_2	67.78	77.78	605.828	605.826	605.827	12863	2	27	4346.25	903071	70.8188	76.7959	BCL2|130	FATVVEELFR	2	NA	NA	16	10	FATVVEELFR	2	15958	15967	0.389077	0.44016	0.290157	-0.168082	0.341614	0.398529	0.260958	-0.117761	72.4376	72.78	-0.342426	26	12	MOCK
560.276	37.7312	FLNA|1502_RDADGTQTVNYVPSR_3	32.73	42.73	560.277	560.275	560.276	5034	3	27	2342.9	1.82961e+06	35.9073	41.8583	FLNA|1502	RDADGTQTVNYVPSR	3	NA	NA	70	15	RDADGTQTVNYVPSR	2	117715	117729	0.374937	0.405732	0.265966	-0.313602	0.393891	0.422825	0.277923	-0.227444	39.0484	37.73	1.3184	26	12	MOCK
557.299	44.2714	PLA2R1|21_EGVAAALTPER_2	39.27	49.27	557.3	557.298	557.299	6426	2	27	2678.23	1.94518e+06	42.3458	48.2925	PLA2R1|21	EGVAAALTPER	2	NA	NA	23	11	EGVAAALTPER	1	25789	25799	0.369899	0.396941	0.259856	-0.156004	0.386608	0.411647	0.270093	-0.217073	44.6372	44.27	0.367197	26	12	MOCK
557.928	36.8535	FBLN1|30_RDVLLEACCADGHR_3	31.85	41.85	557.929	557.927	557.928	4223	3	27	2155.87	6337158	35.3056	41.2628	FBLN1|30	RDVLLEACCADGHR	3	8;9	Carbamidomethyl@C;Carbamidomethyl@C	64	14	RDVLLEACCADGHR	1	96586	96599	0.340898	0.361777	0.23566	-0.516136	0.373044	0.390944	0.255702	-0.507428	35.9312	36.85	-0.918833	26	12	MOCK
794.019	50.9195	EIF4B|46_RDLEGDVSTTWHSNDDDVYR_3	45.92	55.92	794.02	794.018	794.019	8716	3	27	3243.21	1.96343e+06	49.4697	55.4475	EIF4B|46	RDLEGDVSTTWHSNDDDVYR	3	NA	NA	83	20	RDLEGDVSTTWHSNDDDVYR	1	147922	147941	0.287542	0.307721	0.199132	-0.150649	0.0826756	0.120333	0.0767927	-0.280232	54.0534	50.92	3.13344	26	12	MOCK
496.295	48.7357	ERN1|280_LTPTLYVGK_2	43.74	53.74	496.296	496.294	496.295	7080	2	27	2834.52	932168	46.8529	52.7919	ERN1|280	LTPTLYVGK	2	NA	NA	14	9	LTPTLYVGK	2	12595	12603	0.281639	0.348343	0.226511	-0.0976906	0.513096	0.548579	0.369662	-0.00513196	47.242	48.74	-1.49797	26	12	MOCK
520.925	34.7462	CPSF7|33_RDVLTATSQPSDDR_3	29.75	39.75	520.926	520.924	520.925	3516	3	27	1984.53	1.68358e+06	33.0422	39.0097	CPSF7|33	RDVLTATSQPSDDR	3	NA	NA	61	14	RDVLTATSQPSDDR	1	87759	87772	0.257801	0.288584	0.186369	-0.348374	0.289306	0.317235	0.205509	-0.301887	33.0754	34.75	-1.67456	26	12	MOCK
848.393	68.08	UQCRHL|15_RDPEEEEEEEEELVDPLTTVR_3	63.08	73.08	848.394	848.392	848.393	11990	3	27	4120.35	10553308	66.0663	72.0455	UQCRHL|15	RDPEEEEEEEEELVDPLTTVR	3	NA	NA	84	21	RDPEEEEEEEEELVDPLTTVR	2	150838	150858	0.251697	0.281177	0.181449	0.23665	0.263877	0.29917	0.19342	-0.31056	68.6725	68.08	0.592485	26	12	MOCK
467.733	29.7107	CENPU|49_NSDVSSIGR_2	24.71	34.71	467.734	467.732	467.733	3172	2	27	1896.45	258512	27.8569	33.8203	CENPU|49	NSDVSSIGR	2	NA	NA	11	9	NSDVSSIGR	1	10499	10507	0.24592	0.296247	0.19147	-0.229655	0.249691	0.299739	0.193799	-0.314333	31.6075	29.71	1.89749	26	12	MOCK
587.269	26.2323	TNFRSF12A|28_EQAPGTAPCSR_2	21.23	31.23	587.27	587.269	587.269	2262	2	27	1660.87	309866	24.2962	30.285	TNFRSF12A|28	EQAPGTAPCSR	2	9	Carbamidomethyl@C	28	11	EQAPGTAPCSR	1	31789	31799	0.235176	0.27678	0.178535	-0.0824578	0.264866	0.302441	0.195603	-0.148687	27.6811	26.23	1.45109	26	12	MOCK
570.276	58.136	PDIA3|26_RDVLELTDDNFESR_3	53.14	63.14	570.277	570.275	570.276	9336	3	27	3408.26	639331	56.6996	62.6679	PDIA3|26	RDVLELTDDNFESR	3	NA	NA	65	14	RDVLELTDDNFESR	1	98796	98809	0.193442	0.231949	0.14902	-0.261248	0.206225	0.243496	0.156589	-0.352728	56.8043	58.14	-1.33571	26	12	MOCK
364.519	25.9378	CENPU|49_RDSDVSSIGR_3	20.94	30.94	364.521	364.519	364.519	2064	3	27	1607.4	65911.8	24.205	30.2004	CENPU|49	RDSDVSSIGR	3	NA	NA	19	10	RDSDVSSIGR	1	20575	20584	0.181153	0.226982	0.145772	-0.231789	0.171062	0.217408	0.139521	-0.231789	26.79	25.94	0.849957	26	12	MOCK
471.236	24.3151	ERO1A|24_REEQPPETAAQR_3	19.32	29.32	471.237	471.235	471.236	2357	3	27	1685.71	8.383e+06	22.2977	28.2931	ERO1A|24	REEQPPETAAQR	3	NA	NA	37	12	REEQPPETAAQR	1	46282	46293	0.173977	0.216854	0.139159	-0.33284	0.158334	0.20163	0.129248	-0.384214	28.0952	24.32	3.77517	26	12	MOCK
598.297	34.4875	ENG|26_RETVHCDLQPVGPER_3	29.49	39.49	598.298	598.296	598.297	3459	3	27	1970.57	164315	32.8428	38.8097	ENG|26	RETVHCDLQPVGPER	3	6	Carbamidomethyl@C	69	15	RETVHCDLQPVGPER	1	113697	113711	0.124971	0.163459	0.10453	-0.3838	0.0922308	0.134543	0.0859133	-0.438346	32.8428	34.49	-1.64716	26	12	MOCK
630.957	51.6242	HSP90B1|22_RDDEVDVDGTVEEDLGK_3	46.62	56.62	630.958	630.956	630.957	7885	3	27	3032.74	2288785	49.7413	55.717	HSP90B1|22	RDDEVDVDGTVEEDLGK	3	NA	NA	77	17	RDDEVDVDGTVEEDLGK	1	136026	136042	0.075626	0.114371	0.0729708	-0.11598	0.101469	0.140489	0.0897349	-0.205014	50.5457	51.62	-1.07431	26	12	MOCK
559.957	43.3358	P4HB|18_RDAPEEEDHVLVLR_3	38.34	48.34	559.958	559.956	559.957	5951	3	27	2567.35	13915144	41.6497	47.6115	P4HB|18	RDAPEEEDHVLVLR	3	NA	NA	55	14	RDAPEEEDHVLVLR	1	76696	76709	0.0711127	0.126404	0.0806874	-0.533552	0.0884607	0.138609	0.088526	-0.493298	42.7891	43.34	-0.550864	26	12	MOCK
832.87	52.702	TMEM59|36_EAFDSVLGDTASCHR_2	47.7	57.7	832.871	832.869	832.87	8185	2	27	3108.3	927359	50.8449	56.8082	TMEM59|36	EAFDSVLGDTASCHR	2	13	Carbamidomethyl@C	66	15	EAFDSVLGDTASCHR	1	101685	101699	0.0603492	0.103684	0.0661262	-0.398838	0.101115	0.140629	0.0898249	-0.305161	51.805	52.7	-0.894971	26	12	MOCK
786.327	31.4927	IGFBP4|22_DEAIHCPPCSEEK_2	26.49	36.49	786.328	786.326	786.327	4123	2	27	2132.6	1.05885e+06	29.7628	35.7324	IGFBP4|22	DEAIHCPPCSEEK	2	6;9	Carbamidomethyl@C;Carbamidomethyl@C	54	13	DEAIHCPPCSEEK	2	76248	76260	0.013049	0.0786928	0.0501493	0.0784846	-0.000681328	0.0742346	0.0473027	-0.332881	35.5433	31.49	4.05334	26	12	MOCK
576.587	27.2043	IGFBP4|22_RDEAIHCPPCSEEK_3	22.2	32.2	576.588	576.586	576.587	2894	3	27	1823.85	707397	25.4825	31.4535	IGFBP4|22	RDEAIHCPPCSEEK	3	7;10	Carbamidomethyl@C;Carbamidomethyl@C	62	14	RDEAIHCPPCSEEK	1	92010	92023	0.00408855	0.0568157	0.0361896	-0.0683855	0.0421201	0.0916337	0.0584178	-0.291727	30.3975	27.2	3.19751	26	12	MOCK
443.882	22.4798	TNFRSF12A|28_REQAPGTAPCSR_3	17.48	27.48	443.884	443.882	443.883	765	3	27	1222.87	53645	20.3812	26.3573	TNFRSF12A|28	REQAPGTAPCSR	3	10	Carbamidomethyl@C	33	12	REQAPGTAPCSR	0	36569	36580	0	0	0	-0.444961	0	0	0	-0.444961	20.3812	22.48	-2.09881	26	12	MOCK
806.875	19.0125	SHMT2|27_QHSNAAQTQTGEANR_2	14.01	24.01	806.876	806.874	806.875	137	2	27	1016.84	14447.8	16.9474	22.9379	SHMT2|27	QHSNAAQTQTGEANR	2	NA	NA	67	15	QHSNAAQTQTGEANR	0	103995	104009	0	0	0	0.434211	0	0	0	-0.346719	16.9474	19.01	-2.0626	26	12	MOCK
590.614	17.8991	SHMT2|27_REHSNAAQTQTGEANR_3	12.9	22.9	590.615	590.613	590.614	1	3	27	959.703	12865.3	15.9951	21.9936	SHMT2|27	REHSNAAQTQTGEANR	3	NA	NA	73	16	REHSNAAQTQTGEANR	0	121957	121972	0	0	0	-0.0196999	0	0	0	-0.500528	15.9951	17.9	-1.90494	26	12	MOCK
836.415	69.2789	SQSTM1|421_NYDIGAALDTIQYSK_2	64.28	74.28	836.416	836.414	836.415	12207	2	27	4189.25	14620237	67.1014	73.0787	SQSTM1|421	NYDIGAALDTIQYSK	2	NA	NA	71	15	NYDIGAALDTIQYSK	15	120011	120025	0.988349	0.989929	0.909575	0.770677	0.984433	0.986551	0.895475	0.75933	69.8208	69.28	0.540791	27	12	MG132
745.392	59.9233	PRTC11_SFANQPLEVVYSK_2	54.92	64.92	745.393	745.391	745.392	9829	2	27	3540.18	57899380	58.0241	64.0139	PRTC11	SFANQPLEVVYSK	2	13	Label:13C(6)15N(2)@K	45	13	SFANQPLEVVYSk	16	58300	58312	0.987276	0.989222	0.906447	0.859857	0.964286	0.969753	0.843022	0.727475	59.003	59.92	-0.916963	27	12	MG132
773.895	53.205	PRTC08_ELGQSGVDTYLQTK_2	48.21	58.21	773.896	773.894	773.895	8405	2	27	3165.06	26327538	51.1911	57.1694	PRTC08	ELGQSGVDTYLQTK	2	14	Label:13C(6)15N(2)@K	56	14	ELGQSGVDTYLQTk	14	78953	78966	0.985129	0.987566	0.899501	0.739264	0.902473	0.919218	0.742355	0.781653	52.751	53.21	-0.45898	27	12	MG132
682.849	48.3756	SSBP1|17_ESETTTSLVLER_2	43.38	53.38	682.85	682.848	682.849	7141	2	27	2843.16	3.49794e+06	46.5728	52.5209	SSBP1|17	ESETTTSLVLER	2	NA	NA	34	12	ESETTTSLVLER	11	41427	41438	0.950673	0.958293	0.815489	0.819521	0.944171	0.95319	0.804443	0.819521	47.3859	48.38	-0.994059	27	12	MG132
764.835	69.703	ATF4|76_EDAFSGTDWMLEK_2	64.7	74.7	764.836	764.834	764.835	12145	2	27	4173.71	4.62017e+06	67.4915	73.4612	ATF4|76	EDAFSGTDWMLEK	2	NA	NA	42	13	EDAFSGTDWMLEK	9	51832	51844	0.949911	0.95676	0.812106	0.669779	0.932737	0.941877	0.78188	0.661094	69.5618	69.7	-0.13818	27	12	MG132
761.381	51.6026	P4HB|18_DAPEEEDHVLVLR_2	46.6	56.6	761.382	761.38	761.381	7754	2	27	3001.25	495725	49.7228	55.6944	P4HB|18	DAPEEEDHVLVLR	2	NA	NA	51	13	DAPEEEDHVLVLR	1	67096	67108	0.941526	0.926861	0.755008	-0.253528	0.681959	0.661323	0.46001	-0.518997	50.0208	51.6	-1.57918	27	12	MG132
680.374	71.767	PRTC14_ELASGLSFPVGFK_2	66.77	76.77	680.375	680.372	680.373	12637	2	27	4299.72	846312	69.86	75.8523	PRTC14	ELASGLSFPVGFK	2	13	Label:13C(6)15N(2)@K	48	13	ELASGLSFPVGFk	8	62872	62884	0.935972	0.94408	0.786095	0.564101	0.864202	0.883948	0.690249	0.593411	71.6619	71.77	-0.108079	27	12	MG132
758.338	44.9663	FBLN1|30_DVLLEACCADGHR_2	39.97	49.97	758.339	758.337	758.338	6215	2	27	2620	1.38677e+06	43.1659	49.1416	FBLN1|30	DVLLEACCADGHR	2	7;8	Carbamidomethyl@C;Carbamidomethyl@C	53	13	DVLLEACCADGHR	7	72376	72388	0.932045	0.938501	0.77557	0.173361	0.934936	0.942789	0.783615	0.173687	43.6666	44.97	-1.30336	27	12	MG132
451.283	34.9206	PRTC04_DIPVPKPK_2	29.92	39.92	451.284	451.282	451.283	4216	2	27	2134.77	18095082	33.2895	39.2331	PRTC04	DIPVPKPK	2	8	Label:13C(6)15N(2)@K	2	8	DIPVPKPk	8	1357	1364	0.928362	0.937018	0.772851	0.584291	0.936182	0.944146	0.786222	0.606185	35.5794	34.92	0.659437	27	12	MG132
801.411	60.0386	PRTC10_GILFVGSGVSGGEEGAR_2	55.04	65.04	801.412	801.41	801.411	9793	2	27	3531.92	53972384	58.3422	64.3124	PRTC10	GILFVGSGVSGGEEGAR	2	17	Label:13C(6)15N(4)@R	79	17	GILFVGSGVSGGEEGAr	19	141416	141432	0.924066	0.931664	0.763286	0.30554	0.613349	0.653826	0.453675	0.2769	58.8653	60.04	-1.17469	27	12	MG132
787.421	72.8278	PRTC15_LSSEAPALFQFDLK_2	67.83	77.83	787.422	787.42	787.421	12962	2	27	4384.48	31746770	70.9386	76.9301	PRTC15	LSSEAPALFQFDLK	2	14	Label:13C(6)15N(2)@K	63	14	LSSEAPALFQFDLk	8	93448	93461	0.920138	0.916665	0.738259	-0.204901	0.867219	0.862349	0.662015	-0.113122	73.0747	72.83	0.244749	27	12	MG132
498.802	63.8572	PRTC12_LTILEELR_2	58.86	68.86	498.803	498.801	498.802	11059	2	27	3869	331182	61.8171	67.7937	PRTC12	LTILEELR	2	8	Label:13C(6)15N(4)@R	7	8	LTILEELr	8	6733	6740	0.913822	0.93257	0.764878	0.740832	0.630095	0.691061	0.485712	0.39792	64.4833	63.86	0.623287	27	12	MG132
587.269	26.2323	TNFRSF12A|28_EQAPGTAPCSR_2	21.23	31.23	587.27	587.269	587.269	1863	2	27	1546.06	1.28517e+06	24.2844	30.2508	TNFRSF12A|28	EQAPGTAPCSR	2	9	Carbamidomethyl@C	28	11	EQAPGTAPCSR	9	31511	31521	0.909215	0.919673	0.743092	0.618293	0.934365	0.942108	0.782319	0.705722	25.7677	26.23	-0.462321	27	12	MG132
628.299	27.7828	ERO1A|24_EEQPPETAAQR_2	22.78	32.78	628.3	628.298	628.299	2318	2	27	1659.44	213883	25.9233	31.8903	ERO1A|24	EEQPPETAAQR	2	NA	NA	22	11	EEQPPETAAQR	2	24261	24271	0.900814	0.902115	0.715973	0.0747654	0.860806	0.863764	0.663798	-0.0741088	27.6573	27.78	-0.122676	27	12	MG132
496.287	29.929	PRTC03_HVLTSIGEK_2	24.93	34.93	496.288	496.286	496.287	3477	2	27	1947.08	433889	28.005	33.9928	PRTC03	HVLTSIGEK	2	9	Label:13C(6)15N(2)@K	13	9	HVLTSIGEk	3	12083	12091	0.887465	0.893583	0.703633	0.357038	0.921747	0.927318	0.755784	0.0172287	32.4514	29.93	2.52141	27	12	MG132
573.302	67.5684	PRTC13_NGFILDGFPR_2	62.57	72.57	573.303	573.301	573.302	11383	2	27	3967.63	530827	65.8357	71.8203	PRTC13	NGFILDGFPR	2	10	Label:13C(6)15N(4)@R	20	10	NGFILDGFPr	3	21773	21782	0.867244	0.874514	0.677639	0.511969	0.773702	0.788057	0.577826	0.494723	66.1272	67.57	-1.44276	27	12	MG132
560.276	37.7312	FLNA|1502_RDADGTQTVNYVPSR_3	32.73	42.73	560.277	560.275	560.276	4561	3	27	2217.93	1.1034e+06	35.9167	41.8922	FLNA|1502	RDADGTQTVNYVPSR	3	NA	NA	70	15	RDADGTQTVNYVPSR	3	116483	116497	0.862848	0.852408	0.649717	-0.187867	0.86304	0.855222	0.653158	-0.0980861	36.9655	37.73	-0.764506	27	12	MG132
761.368	41.0085	FLNA|1502_NADGTQTVNYVPSR_2	36.01	46.01	761.369	761.367	761.368	5482	2	27	2444.32	461559	39.183	45.131	FLNA|1502	NADGTQTVNYVPSR	2	NA	NA	60	14	NADGTQTVNYVPSR	3	86298	86311	0.860283	0.855034	0.652928	-0.0516093	0.849306	0.845453	0.641339	-0.0035857	40.7386	41.01	-0.271409	27	12	MG132
493.768	26.3416	PRTC01_SSAAPPPPPR_2	21.34	31.34	493.769	493.767	493.768	2670	2	27	1745.31	1.59582e+06	24.7348	30.7261	PRTC01	SSAAPPPPPR	2	10	Label:13C(6)15N(4)@R	18	10	SSAAPPPPPr	5	19298	19307	0.835253	0.849037	0.645634	0.0510939	0.543072	0.596732	0.407069	0.129858	29.0885	26.34	2.74855	27	12	MG132
471.236	24.3151	ERO1A|24_REEQPPETAAQR_3	19.32	29.32	471.237	471.235	471.236	1562	3	27	1470.66	861753	22.2962	28.2738	ERO1A|24	REEQPPETAAQR	3	NA	NA	37	12	REEQPPETAAQR	1	45299	45310	0.828194	0.81346	0.604838	-0.314658	0.827076	0.814501	0.605978	-0.366032	24.5109	24.32	0.190929	27	12	MG132
415.74	33.151	MTHFD2|36_EAVVISGR_2	28.15	38.15	415.741	415.739	415.74	3409	2	27	1929.18	627624	31.2533	37.2367	MTHFD2|36	EAVVISGR	2	NA	NA	4	8	EAVVISGR	4	3632	3639	0.808343	0.830635	0.624045	0.353311	0.812982	0.834627	0.628634	0.353311	32.153	33.15	-0.997016	27	12	MG132
594.299	39.5989	FKBP11|26_EAGLETESPVR_2	34.6	44.6	594.3	594.298	594.299	5294	2	27	2396.44	1.11809e+06	37.7549	43.7483	FKBP11|26	EAGLETESPVR	2	NA	NA	26	11	EAGLETESPVR	2	27701	27711	0.790943	0.79085	0.580723	0.0747654	0.802635	0.80208	0.592546	0.0747654	39.9407	39.6	0.340664	27	12	MG132
695.832	45.6162	PRTC06_TASEFDSAIAQDK_2	40.62	50.62	695.833	695.831	695.832	6519	2	27	2693.52	4.1276e+06	43.5079	49.4444	PRTC06	TASEFDSAIAQDK	2	13	Label:13C(6)15N(2)@K	43	13	TASEFDSAIAQDk	15	53920	53932	0.79089	0.831457	0.624985	0.546353	0.859194	0.883284	0.689345	0.390849	44.892	45.62	-0.728043	27	12	MG132
558.326	56.6711	PRTC09_GLILVGGYGTR_2	51.67	61.67	558.327	558.325	558.326	10004	2	27	3584.33	11141860	54.8758	60.8625	PRTC09	GLILVGGYGTR	2	11	Label:13C(6)15N(4)@R	29	11	GLILVGGYGTr	4	34541	34551	0.787536	0.809973	0.601036	0.755629	0.583144	0.620997	0.426544	0.459756	59.7388	56.67	3.06881	27	12	MG132
570.276	58.136	PDIA3|26_RDVLELTDDNFESR_3	53.14	63.14	570.277	570.275	570.276	9672	3	27	3501.69	1345678	56.6997	62.6431	PDIA3|26	RDVLELTDDNFESR	3	NA	NA	65	14	RDVLELTDDNFESR	1	99506	99519	0.775623	0.755985	0.545683	-0.248186	0.777842	0.757788	0.54744	-0.344019	58.3615	58.14	0.221468	27	12	MG132
427.226	43.2527	CALR|18_EPAVYFK_2	38.25	48.25	427.227	427.225	427.226	5753	2	27	2511.7	4478213	41.8212	47.7762	CALR|18	EPAVYFK	2	NA	NA	1	7	EPAVYFK	5	6	12	0.772036	0.807841	0.598728	0.766957	0.784449	0.817733	0.609539	0.786087	41.8617	43.25	-1.38826	27	12	MG132
422.736	38.5693	PRTC05_IGDYAGIK_2	33.57	43.57	422.737	422.735	422.736	4850	2	27	2287.56	46536736	36.735	42.7095	PRTC05	IGDYAGIK	2	8	Label:13C(6)15N(2)@K	6	8	IGDYAGIk	7	5039	5046	0.745105	0.779748	0.569306	0.547072	0.209052	0.336426	0.218437	0.531199	38.1259	38.57	-0.444077	27	12	MG132
613.317	30.6463	PRTC02_GISNEGQNASIK_2	25.65	35.65	613.318	613.316	613.317	3060	2	27	1838.18	6535922	28.7971	34.7536	PRTC02	GISNEGQNASIK	2	12	Label:13C(6)15N(2)@K	40	12	GISNEGQNASIk	9	49490	49501	0.737202	0.77637	0.565882	0.45969	0.557208	0.610582	0.418129	0.34179	30.6363	30.65	-0.013679	27	12	MG132
760.356	53.4877	BAX|66_IGDELDSNMELQR_2	48.49	58.49	760.357	760.356	760.356	8559	2	27	3204.32	452474	51.5566	57.5232	BAX|66	IGDELDSNMELQR	2	NA	NA	44	13	IGDELDSNMELQR	6	56248	56260	0.736872	0.769358	0.558848	0.166956	0.71859	0.753877	0.543637	0.167173	53.4053	53.49	-0.084688	27	12	MG132
818.891	39.83	ENG|26_ETVHCDLQPVGPER_2	34.83	44.83	818.892	818.89	818.891	5064	2	27	2338.1	90824.4	37.9483	43.9087	ENG|26	ETVHCDLQPVGPER	2	5	Carbamidomethyl@C	58	14	ETVHCDLQPVGPER	3	83919	83932	0.722831	0.73657	0.527112	-0.139162	0.641216	0.664478	0.462692	-0.147614	38.9683	39.83	-0.861747	27	12	MG132
559.957	43.3358	P4HB|18_RDAPEEEDHVLVLR_3	38.34	48.34	559.958	559.956	559.957	5810	3	27	2524.19	824366	41.655	47.6132	P4HB|18	RDAPEEEDHVLVLR	3	NA	NA	55	14	RDAPEEEDHVLVLR	2	76587	76600	0.710439	0.708094	0.500889	-0.396354	0.763044	0.759561	0.549172	-0.360454	42.0698	43.34	-1.27015	27	12	MG132
586.8	46.4127	PRTC07_SAAGAFGPELSR_2	41.41	51.41	586.801	586.799	586.8	7079	2	27	2827.67	6.08118e+06	44.5402	50.4878	PRTC07	SAAGAFGPELSR	2	12	Label:13C(6)15N(4)@R	32	12	SAAGAFGPELSr	10	35597	35608	0.699799	0.740194	0.530533	0.573573	0.352157	0.432198	0.284524	0.327202	47.1278	46.41	0.717802	27	12	MG132
584.304	60.3621	P4HA3|29_DTFSALTSVAR_2	55.36	65.36	584.305	584.303	584.304	10449	2	27	3701.68	1.38142e+06	58.4467	64.4276	P4HA3|29	DTFSALTSVAR	2	NA	NA	27	11	DTFSALTSVAR	4	29701	29711	0.69063	0.72489	0.516219	0.202064	0.687669	0.722382	0.513906	0.133677	61.6947	60.36	1.33472	27	12	MG132
752.854	54.3255	HSP90B1|24_EVDVDGTVEEDLGK_2	49.33	59.33	752.855	752.853	752.854	9389	2	27	3424.82	6818633	52.2757	58.2452	HSP90B1|24	EVDVDGTVEEDLGK	2	NA	NA	57	14	EVDVDGTVEEDLGK	3	82957	82970	0.688891	0.708223	0.501006	0.171903	0.611646	0.63823	0.440666	0.0391873	57.0804	54.33	2.75039	27	12	MG132
598.297	34.4875	ENG|26_RETVHCDLQPVGPER_3	29.49	39.49	598.298	598.296	598.297	3623	3	27	1984.85	587802	32.8351	38.8181	ENG|26	RETVHCDLQPVGPER	3	6	Carbamidomethyl@C	69	15	RETVHCDLQPVGPER	1	113613	113627	0.658285	0.657014	0.456361	-0.376282	0.821978	0.805877	0.596612	-0.415789	33.0808	34.49	-1.40925	27	12	MG132
337.187	35.4809	CALR|18_REPAVYFK_3	30.48	40.48	337.188	337.186	337.187	3774	3	27	2022.64	275820	33.6316	39.5993	CALR|18	REPAVYFK	3	NA	NA	3	8	REPAVYFK	2	2162	2169	0.655182	0.67415	0.47098	-0.201149	0.589194	0.618425	0.424458	0.0218938	33.7106	35.48	-1.76936	27	12	MG132
794.019	50.9195	EIF4B|46_RDLEGDVSTTWHSNDDDVYR_3	45.92	55.92	794.02	794.018	794.019	7834	3	27	3021.99	958976	49.4683	55.4644	EIF4B|46	RDLEGDVSTTWHSNDDDVYR	3	NA	NA	83	20	RDLEGDVSTTWHSNDDDVYR	1	145035	145054	0.653543	0.641649	0.443499	-0.146548	0.676157	0.663304	0.461693	-0.261777	50.3665	50.92	-0.553524	27	12	MG132
507.602	41.2944	SSBP1|17_RESETTTSLVLER_3	36.29	46.29	507.603	507.601	507.602	5304	3	27	2399	574114	39.6428	45.6056	SSBP1|17	RESETTTSLVLER	3	NA	NA	49	13	RESETTTSLVLER	1	65236	65248	0.644106	0.635765	0.43863	-0.354538	0.61643	0.612613	0.419763	-0.305688	39.9834	41.29	-1.30665	27	12	MG132
554.272	47.8065	HSP90B1|24_REVDVDGTVEEDLGK_3	42.81	52.81	554.273	554.271	554.272	6956	3	27	2799.87	2.02165e+06	45.8487	51.8346	HSP90B1|24	REVDVDGTVEEDLGK	3	NA	NA	68	15	REVDVDGTVEEDLGK	1	111065	111079	0.63066	0.625538	0.430241	-0.0873206	0.605321	0.600671	0.4102	-0.243336	46.6645	47.81	-1.14554	27	12	MG132
776.86	67.1829	PDIA3|26_DVLELTDDNFESR_2	62.18	72.18	776.861	776.859	776.86	12381	2	27	4232.76	1.71287e+06	65.2773	71.2474	PDIA3|26	DVLELTDDNFESR	2	NA	NA	52	13	DVLELTDDNFESR	2	71992	72004	0.61753	0.633539	0.436796	0.0285497	0.634865	0.648055	0.448834	-0.0933022	70.546	67.18	3.36602	27	12	MG132
681.355	58.8019	LSM3|7_REQQTTNTVEEPLDLIR_3	53.8	63.8	681.356	681.354	681.355	10192	3	27	3633.75	6106883	56.6774	62.647	LSM3|7	REQQTTNTVEEPLDLIR	3	NA	NA	78	17	REQQTTNTVEEPLDLIR	1	140104	140120	0.610216	0.603986	0.412844	-0.395627	0.606248	0.602154	0.411381	-0.358997	60.5626	58.8	1.76257	27	12	MG132
329.53	27.6908	MTHFD2|36_REAVVISGR_3	22.69	32.69	329.531	329.529	329.53	2245	3	27	1642.48	1.5361e+06	25.6982	31.6397	MTHFD2|36	REAVVISGR	3	NA	NA	10	9	REAVVISGR	1	8531	8539	0.5508	0.564073	0.381533	-0.206928	0.543374	0.557813	0.376719	-0.1261	27.3747	27.69	-0.315258	27	12	MG132
607.616	43.539	TMEM59|36_REAFDSVLGDTASCHR_3	38.54	48.54	607.617	607.615	607.616	5928	3	27	2551.89	8521132	41.7749	47.7687	TMEM59|36	REAFDSVLGDTASCHR	3	14	Carbamidomethyl@C	75	16	REAFDSVLGDTASCHR	1	133098	133113	0.539677	0.538925	0.362339	-0.439817	0.532764	0.534776	0.359208	-0.403807	42.5315	43.54	-1.00854	27	12	MG132
448.569	33.1905	FKBP11|26_REAGLETESPVR_3	28.19	38.19	448.57	448.568	448.569	4280	3	27	2150.83	1.96785e+06	31.3335	37.3072	FKBP11|26	REAGLETESPVR	3	NA	NA	39	12	REAGLETESPVR	1	48434	48445	0.514834	0.522799	0.350224	-0.314658	0.524344	0.532346	0.357379	-0.314658	35.8471	33.19	2.65711	27	12	MG132
702.834	41.5014	CPSF7|33_DVLTATSQPSDDR_2	36.5	46.5	702.835	702.833	702.834	6078	2	27	2587.12	339852	39.6095	45.5675	CPSF7|33	DVLTATSQPSDDR	2	NA	NA	46	13	DVLTATSQPSDDR	1	61468	61480	0.487203	0.497561	0.331542	-0.0147091	0.488806	0.498812	0.33246	-0.197948	43.1186	41.5	1.6186	27	12	MG132
467.733	29.7107	CENPU|49_NSDVSSIGR_2	24.71	34.71	467.734	467.732	467.733	3392	2	27	1924.55	267612	27.8667	33.8334	CENPU|49	NSDVSSIGR	2	NA	NA	11	9	NSDVSSIGR	1	10547	10555	0.481867	0.502422	0.335116	-0.218292	0.446961	0.471708	0.312724	-0.291606	32.0758	29.71	2.36582	27	12	MG132
557.299	44.2714	PLA2R1|21_EGVAAALTPER_2	39.27	49.27	557.3	557.298	557.299	6804	2	27	2763.1	699382	42.3351	48.3027	PLA2R1|21	EGVAAALTPER	2	NA	NA	23	11	EGVAAALTPER	1	26421	26431	0.462832	0.47827	0.317472	-0.134053	0.475243	0.489309	0.325502	-0.202439	46.0517	44.27	1.78166	27	12	MG132
605.827	72.7819	BCL2|130_FATVVEELFR_2	67.78	77.78	605.828	605.826	605.827	12959	2	27	4383.78	1.70894e+06	70.8142	76.8016	BCL2|130	FATVVEELFR	2	NA	NA	16	10	FATVVEELFR	2	16067	16076	0.456584	0.50212	0.334893	-0.151094	0.428729	0.477793	0.317126	-0.0917631	73.063	72.78	0.282988	27	12	MG132
557.928	36.8535	FBLN1|30_RDVLLEACCADGHR_3	31.85	41.85	557.929	557.927	557.928	4408	3	27	2181.9	1.16932e+06	35.3053	41.279	FBLN1|30	RDVLLEACCADGHR	3	8;9	Carbamidomethyl@C;Carbamidomethyl@C	64	14	RDVLLEACCADGHR	1	96776	96789	0.340898	0.361777	0.23566	-0.516136	0.373044	0.390944	0.255702	-0.507428	36.3651	36.85	-0.484946	27	12	MG132
496.295	48.7357	ERN1|280_LTPTLYVGK_2	43.74	53.74	496.296	496.294	496.295	7248	2	27	2870.11	1.20516e+06	46.8353	52.8092	ERN1|280	LTPTLYVGK	2	NA	NA	14	9	LTPTLYVGK	2	12667	12675	0.296255	0.357141	0.232497	-0.0866935	0.560006	0.583583	0.3967	0.0168622	47.8351	48.74	-0.904908	27	12	MG132
443.882	22.4798	TNFRSF12A|28_REQAPGTAPCSR_3	17.48	27.48	443.884	443.882	443.883	1565	3	27	1471.45	1626487	20.3777	26.3723	TNFRSF12A|28	REQAPGTAPCSR	3	10	Carbamidomethyl@C	33	12	REQAPGTAPCSR	2	40349	40360	0.291175	0.344412	0.223843	-0.250951	0.302657	0.355637	0.231472	-0.263073	24.5242	22.48	2.04418	27	12	MG132
630.957	51.6242	HSP90B1|22_RDDEVDVDGTVEEDLGK_3	46.62	56.62	630.958	630.956	630.957	7763	3	27	3003.41	4.58537e+06	49.7572	55.71	HSP90B1|22	RDDEVDVDGTVEEDLGK	3	NA	NA	77	17	RDDEVDVDGTVEEDLGK	1	135208	135224	0.285314	0.308985	0.199979	-0.0986723	0.293722	0.317049	0.205384	-0.193475	50.0569	51.62	-1.56312	27	12	MG132
520.925	34.7462	CPSF7|33_RDVLTATSQPSDDR_3	29.75	39.75	520.926	520.924	520.925	3706	3	27	2005.7	997748	33.0449	39.0346	CPSF7|33	RDVLTATSQPSDDR	3	NA	NA	61	14	RDVLTATSQPSDDR	1	87884	87897	0.257801	0.288584	0.186369	-0.348374	0.289306	0.317235	0.205509	-0.301887	33.4283	34.75	-1.3217	27	12	MG132
542.269	42.9302	CASP3|29_SGISLDNSYK_2	37.93	47.93	542.27	542.269	542.269	5607	2	27	2475.33	1508285	41.2167	47.1634	CASP3|29	SGISLDNSYK	2	NA	NA	15	10	SGISLDNSYK	2	14060	14069	0.256409	0.30554	0.197674	-0.00913775	0.243887	0.294355	0.190209	-0.0181468	41.2555	42.93	-1.67446	27	12	MG132
364.519	25.9378	CENPU|49_RDSDVSSIGR_3	20.94	30.94	364.521	364.519	364.519	2072	3	27	1599.62	1.05055e+06	24.2124	30.1725	CENPU|49	RDSDVSSIGR	3	NA	NA	19	10	RDSDVSSIGR	1	20666	20675	0.2163	0.259267	0.166962	-0.22278	0.211862	0.254933	0.164107	-0.213771	26.6604	25.94	0.720409	27	12	MG132
832.87	52.702	TMEM59|36_EAFDSVLGDTASCHR_2	47.7	57.7	832.871	832.869	832.87	9141	2	27	3357.92	1.12687e+06	50.8283	56.8071	TMEM59|36	EAFDSVLGDTASCHR	2	13	Carbamidomethyl@C	66	15	EAFDSVLGDTASCHR	2	103477	103491	0.0633252	0.125682	0.080224	-0.328913	0.0916633	0.150408	0.0961174	-0.235373	55.9653	52.7	3.26528	27	12	MG132
576.587	27.2043	IGFBP4|22_RDEAIHCPPCSEEK_3	22.2	32.2	576.588	576.586	576.587	2738	3	27	1761.69	143170	25.4749	31.4536	IGFBP4|22	RDEAIHCPPCSEEK	3	7;10	Carbamidomethyl@C;Carbamidomethyl@C	62	14	RDEAIHCPPCSEEK	1	91719	91732	0.00408855	0.0568157	0.0361896	-0.0683855	0.0421201	0.0916337	0.0584178	-0.291727	29.3615	27.2	2.16154	27	12	MG132
786.327	31.4927	IGFBP4|22_DEAIHCPPCSEEK_2	26.49	36.49	786.328	786.326	786.327	2837	2	27	1785.49	150384	29.7581	35.7323	IGFBP4|22	DEAIHCPPCSEEK	2	6;9	Carbamidomethyl@C;Carbamidomethyl@C	54	13	DEAIHCPPCSEEK	0	74212	74224	0	0	0	0.0935193	0	0	0	-0.317846	29.7581	31.49	-1.73188	27	12	MG132
806.875	19.0125	SHMT2|27_QHSNAAQTQTGEANR_2	14.01	24.01	806.876	806.874	806.875	136	2	27	1016.91	14314.1	16.9486	22.9321	SHMT2|27	QHSNAAQTQTGEANR	2	NA	NA	67	15	QHSNAAQTQTGEANR	0	103925	103939	0	0	0	0.434211	0	0	0	-0.346719	16.9486	19.01	-2.06145	27	12	MG132
590.614	17.8991	SHMT2|27_REHSNAAQTQTGEANR_3	12.9	22.9	590.615	590.613	590.614	1	3	27	959.899	14633.8	15.9983	21.9831	SHMT2|27	REHSNAAQTQTGEANR	3	NA	NA	73	16	REHSNAAQTQTGEANR	0	121593	121608	0	0	0	-0.0196999	0	0	0	-0.500528	15.9983	17.9	-1.90169	27	12	MG132
867.881	58.2026	HSP90B1|22_DDEVDVDGTVEEDLGK_2	53.2	63.2	867.882	867.88	867.881	9182	2	27	3369.28	692560	56.1547	62.1427	HSP90B1|22	DDEVDVDGTVEEDLGK	2	NA	NA	74	16	DDEVDVDGTVEEDLGK	0	129888	129903	0	0	0	0.467324	0	0	0	-0.288941	56.1547	58.2	-2.04531	27	12	MG132
848.393	68.08	UQCRHL|15_RDPEEEEEEEEELVDPLTTVR_3	63.08	73.08	848.394	848.392	848.393	11376	3	27	3965.56	1.92133e+06	66.0695	72.0382	UQCRHL|15	RDPEEEEEEEEELVDPLTTVR	3	NA	NA	84	21	RDPEEEEEEEEELVDPLTTVR	0	148133	148153	0	0	0	0.238514	0	0	0	-0.429372	66.0927	68.08	-1.98735	27	12	MG132
773.895	53.205	PRTC08_ELGQSGVDTYLQTK_2	48.21	58.21	773.896	773.894	773.895	8492	2	27	3168.08	4261233	51.1784	57.1683	PRTC08	ELGQSGVDTYLQTK	2	14	Label:13C(6)15N(2)@K	56	14	ELGQSGVDTYLQTk	13	79570	79583	0.983751	0.986468	0.895151	0.804235	0.903576	0.920329	0.744158	0.726671	52.8014	53.21	-0.408605	28	12	MG132
745.392	59.9233	PRTC11_SFANQPLEVVYSK_2	54.92	64.92	745.393	745.391	745.392	9921	2	27	3543.71	29270076	58.0255	64.0148	PRTC11	SFANQPLEVVYSK	2	13	Label:13C(6)15N(2)@K	45	13	SFANQPLEVVYSk	14	58818	58830	0.980947	0.983336	0.883617	0.83668	0.949158	0.956235	0.81096	0.688233	59.0618	59.92	-0.85823	28	12	MG132
451.283	34.9206	PRTC04_DIPVPKPK_2	29.92	39.92	451.284	451.282	451.283	4688	2	27	2235.63	612597	33.2547	39.2498	PRTC04	DIPVPKPK	2	8	Label:13C(6)15N(2)@K	2	8	DIPVPKPk	5	1741	1748	0.961949	0.967081	0.836199	0.536398	0.956704	0.962548	0.825218	0.536946	37.2605	34.92	2.34049	28	12	MG132
764.835	69.703	ATF4|76_EDAFSGTDWMLEK_2	64.7	74.7	764.836	764.834	764.835	12207	2	27	4167.71	5278550	67.494	73.4595	ATF4|76	EDAFSGTDWMLEK	2	NA	NA	42	13	EDAFSGTDWMLEK	7	52230	52242	0.945561	0.950004	0.797844	0.518074	0.928057	0.934088	0.76757	0.522634	69.4618	69.7	-0.238178	28	12	MG132
682.849	48.3756	SSBP1|17_ESETTTSLVLER_2	43.38	53.38	682.85	682.848	682.849	7193	2	27	2839.13	2.94468e+06	46.5734	52.5311	SSBP1|17	ESETTTSLVLER	2	NA	NA	34	12	ESETTTSLVLER	10	41741	41752	0.942872	0.951307	0.800516	0.742495	0.937582	0.947196	0.792194	0.742495	47.3189	48.38	-1.06111	28	12	MG132
761.381	51.6026	P4HB|18_DAPEEEDHVLVLR_2	46.6	56.6	761.382	761.38	761.381	7895	2	27	3019.04	1.07599e+06	49.7181	55.7002	P4HB|18	DAPEEEDHVLVLR	2	NA	NA	51	13	DAPEEEDHVLVLR	12	67734	67746	0.939939	0.946293	0.790408	0.33782	0.802465	0.820996	0.613162	0.270571	50.3174	51.6	-1.28262	28	12	MG132
787.421	72.8278	PRTC15_LSSEAPALFQFDLK_2	67.83	77.83	787.422	787.42	787.421	13055	2	27	4385.98	11652748	70.9372	76.9364	PRTC15	LSSEAPALFQFDLK	2	14	Label:13C(6)15N(2)@K	63	14	LSSEAPALFQFDLk	7	94156	94169	0.932661	0.933279	0.766131	0.101597	0.885033	0.8857	0.692642	-0.0159651	73.0997	72.83	0.269707	28	12	MG132
836.415	69.2789	SQSTM1|421_NYDIGAALDTIQYSK_2	64.28	74.28	836.416	836.414	836.415	12323	2	27	4196.33	12127779	67.0972	73.0781	SQSTM1|421	NYDIGAALDTIQYSK	2	NA	NA	71	15	NYDIGAALDTIQYSK	9	120941	120955	0.929307	0.934457	0.768228	0.0692754	0.923326	0.929012	0.758681	0.0621668	69.9389	69.28	0.658874	28	12	MG132
758.338	44.9663	FBLN1|30_DVLLEACCADGHR_2	39.97	49.97	758.339	758.337	758.338	6254	2	27	2615.13	1.67956e+06	43.1708	49.1389	FBLN1|30	DVLLEACCADGHR	2	7;8	Carbamidomethyl@C;Carbamidomethyl@C	53	13	DVLLEACCADGHR	8	72894	72906	0.928947	0.938928	0.776358	0.229592	0.923024	0.935069	0.769326	0.24696	43.5855	44.97	-1.38447	28	12	MG132
801.411	60.0386	PRTC10_GILFVGSGVSGGEEGAR_2	55.04	65.04	801.412	801.41	801.411	10439	2	27	3678.44	796881	58.3396	64.3146	PRTC10	GILFVGSGVSGGEEGAR	2	17	Label:13C(6)15N(4)@R	79	17	GILFVGSGVSGGEEGAr	10	143491	143507	0.923625	0.930935	0.762012	0.680243	0.613065	0.65286	0.452862	0.432234	61.3073	60.04	1.26728	28	12	MG132
680.374	71.767	PRTC14_ELASGLSFPVGFK_2	66.77	76.77	680.375	680.372	680.373	12868	2	27	4335.19	5601264	69.8598	75.8467	PRTC14	ELASGLSFPVGFK	2	13	Label:13C(6)15N(2)@K	48	13	ELASGLSFPVGFk	13	63642	63654	0.920144	0.933029	0.765689	0.636995	0.800252	0.831078	0.624552	0.676183	72.2532	71.77	0.483215	28	12	MG132
415.74	33.151	MTHFD2|36_EAVVISGR_2	28.15	38.15	415.741	415.739	415.74	3422	2	27	1923.36	818586	31.2665	37.2343	MTHFD2|36	EAVVISGR	2	NA	NA	4	8	EAVVISGR	5	3659	3666	0.917533	0.929048	0.758743	0.500274	0.919513	0.930751	0.761692	0.500274	32.056	33.15	-1.09403	28	12	MG132
498.802	63.8572	PRTC12_LTILEELR_2	58.86	68.86	498.803	498.801	498.802	11353	2	27	3936	110182	61.8237	67.7893	PRTC12	LTILEELR	2	8	Label:13C(6)15N(4)@R	7	8	LTILEELr	5	7474	7481	0.916301	0.921673	0.746354	0.436782	0.586582	0.643225	0.444808	0.016694	65.5999	63.86	1.73994	28	12	MG132
573.302	67.5684	PRTC13_NGFILDGFPR_2	62.57	72.57	573.303	573.301	573.302	11660	2	27	4021.44	4.08213e+06	65.8272	71.8132	PRTC13	NGFILDGFPR	2	10	Label:13C(6)15N(4)@R	20	10	NGFILDGFPr	5	22336	22345	0.884491	0.900749	0.713964	0.750708	0.570881	0.603568	0.41251	0.502317	67.024	67.57	-0.546033	28	12	MG132
761.368	41.0085	FLNA|1502_NADGTQTVNYVPSR_2	36.01	46.01	761.369	761.367	761.368	5512	2	27	2436.92	450015	39.1663	45.1315	FLNA|1502	NADGTQTVNYVPSR	2	NA	NA	60	14	NADGTQTVNYVPSR	6	86876	86889	0.881124	0.884061	0.690402	0.178263	0.863699	0.868771	0.67018	0.222104	40.6153	41.01	-0.39468	28	12	MG132
496.287	29.929	PRTC03_HVLTSIGEK_2	24.93	34.93	496.288	496.286	496.287	3359	2	27	1906.67	1.00923e+06	28.0134	33.9791	PRTC03	HVLTSIGEK	2	9	Label:13C(6)15N(2)@K	13	9	HVLTSIGEk	3	12023	12031	0.875912	0.885156	0.691897	0.357038	0.861728	0.873897	0.67683	0.0172287	31.7778	29.93	1.84782	28	12	MG132
628.299	27.7828	ERO1A|24_EEQPPETAAQR_2	22.78	32.78	628.3	628.298	628.299	2361	2	27	1664.08	567215	25.9311	31.9028	ERO1A|24	EEQPPETAAQR	2	NA	NA	22	11	EEQPPETAAQR	2	24522	24532	0.870059	0.873403	0.676184	0.0747654	0.882314	0.882875	0.68879	-0.0741088	27.7347	27.78	-0.045281	28	12	MG132
560.276	37.7312	FLNA|1502_RDADGTQTVNYVPSR_3	32.73	42.73	560.277	560.275	560.276	4615	3	27	2218.31	1.74012e+06	35.902	41.8923	FLNA|1502	RDADGTQTVNYVPSR	3	NA	NA	70	15	RDADGTQTVNYVPSR	3	117315	117329	0.860977	0.854187	0.651889	-0.187867	0.861904	0.857421	0.655869	-0.0980861	36.9718	37.73	-0.758248	28	12	MG132
587.269	26.2323	TNFRSF12A|28_EQAPGTAPCSR_2	21.23	31.23	587.27	587.269	587.269	1930	2	27	1560.43	289908	24.2938	30.2486	TNFRSF12A|28	EQAPGTAPCSR	2	9	Carbamidomethyl@C	28	11	EQAPGTAPCSR	2	31842	31852	0.83565	0.832359	0.62602	0.0749531	0.75583	0.763922	0.553458	-0.0342402	26.0072	26.23	-0.222836	28	12	MG132
471.236	24.3151	ERO1A|24_REEQPPETAAQR_3	19.32	29.32	471.237	471.235	471.236	1598	3	27	1479.2	974243	22.2971	28.2757	ERO1A|24	REEQPPETAAQR	3	NA	NA	37	12	REEQPPETAAQR	1	45745	45756	0.828194	0.81346	0.604838	-0.314658	0.827076	0.814501	0.605978	-0.366032	24.6533	24.32	0.333272	28	12	MG132
558.326	56.6711	PRTC09_GLILVGGYGTR_2	51.67	61.67	558.327	558.325	558.326	10296	2	27	3640.91	1.84314e+06	54.8853	60.8537	PRTC09	GLILVGGYGTR	2	11	Label:13C(6)15N(4)@R	29	11	GLILVGGYGTr	4	35092	35102	0.816068	0.834468	0.628449	0.755816	0.676206	0.704874	0.497993	0.460319	60.6819	56.67	4.01187	28	12	MG132
695.832	45.6162	PRTC06_TASEFDSAIAQDK_2	40.62	50.62	695.833	695.831	695.832	6560	2	27	2687.82	3659144	43.477	49.457	PRTC06	TASEFDSAIAQDK	2	13	Label:13C(6)15N(2)@K	43	13	TASEFDSAIAQDk	15	54366	54378	0.791103	0.831173	0.624661	0.546461	0.859109	0.883091	0.689083	0.391066	44.7971	45.62	-0.822918	28	12	MG132
570.276	58.136	PDIA3|26_RDVLELTDDNFESR_3	53.14	63.14	570.277	570.275	570.276	9810	3	27	3517.28	2.21591e+06	56.6997	62.6508	PDIA3|26	RDVLELTDDNFESR	3	NA	NA	65	14	RDVLELTDDNFESR	1	100331	100344	0.775623	0.755985	0.545683	-0.248186	0.777842	0.757788	0.54744	-0.344019	58.6213	58.14	0.481306	28	12	MG132
760.356	53.4877	BAX|66_IGDELDSNMELQR_2	48.49	58.49	760.357	760.356	760.356	8609	2	27	3197.86	675424	51.5784	57.524	BAX|66	IGDELDSNMELQR	2	NA	NA	44	13	IGDELDSNMELQR	5	56694	56706	0.767599	0.790495	0.580353	0.0904256	0.762226	0.785743	0.575438	0.090317	53.2977	53.49	-0.192294	28	12	MG132
507.602	41.2944	SSBP1|17_RESETTTSLVLER_3	36.29	46.29	507.603	507.601	507.602	6573	3	27	2690.86	1.88812e+06	39.6235	45.5943	SSBP1|17	RESETTTSLVLER	3	NA	NA	49	13	RESETTTSLVLER	2	67266	67278	0.764759	0.761997	0.551562	-0.239796	0.741457	0.742918	0.533117	-0.190947	44.8476	41.29	3.55759	28	12	MG132
496.295	48.7357	ERN1|280_LTPTLYVGK_2	43.74	53.74	496.296	496.294	496.295	7288	2	27	2862.8	1.09261e+06	46.8286	52.7908	ERN1|280	LTPTLYVGK	2	NA	NA	14	9	LTPTLYVGK	6	12775	12783	0.75468	0.799552	0.589859	0.473424	0.843946	0.873353	0.676119	0.545455	47.7133	48.74	-1.02672	28	12	MG132
613.317	30.6463	PRTC02_GISNEGQNASIK_2	25.65	35.65	613.318	613.316	613.317	3051	2	27	1828.54	24401848	28.7894	34.7701	PRTC02	GISNEGQNASIK	2	12	Label:13C(6)15N(2)@K	40	12	GISNEGQNASIk	11	49859	49870	0.74441	0.786696	0.57642	0.631572	0.549223	0.606388	0.414764	0.366526	30.4756	30.65	-0.174374	28	12	MG132
422.736	38.5693	PRTC05_IGDYAGIK_2	33.57	43.57	422.737	422.735	422.736	4842	2	27	2271.56	63980124	36.7423	42.708	PRTC05	IGDYAGIK	2	8	Label:13C(6)15N(2)@K	6	8	IGDYAGIk	8	5059	5066	0.74437	0.778301	0.567837	0.437603	0.191772	0.320695	0.207833	0.42173	37.8594	38.57	-0.710617	28	12	MG132
493.768	26.3416	PRTC01_SSAAPPPPPR_2	21.34	31.34	493.769	493.767	493.768	2773	2	27	1763.46	4626600	24.7473	30.7288	PRTC01	SSAAPPPPPR	2	10	Label:13C(6)15N(4)@R	18	10	SSAAPPPPPr	1	19546	19555	0.733099	0.723483	0.51492	-0.204762	0.415865	0.442362	0.291719	0.121622	29.3909	26.34	3.05092	28	12	MG132
752.854	54.3255	HSP90B1|24_EVDVDGTVEEDLGK_2	49.33	59.33	752.855	752.853	752.854	9547	2	27	3446.69	3830055	52.2511	58.2155	HSP90B1|24	EVDVDGTVEEDLGK	2	NA	NA	57	14	EVDVDGTVEEDLGK	2	83743	83756	0.689195	0.686855	0.482019	0.0606164	0.652418	0.648306	0.449044	-0.0637326	57.4449	54.33	3.11491	28	12	MG132
586.8	46.4127	PRTC07_SAAGAFGPELSR_2	41.41	51.41	586.801	586.799	586.8	7162	2	27	2831.16	1.60727e+06	44.5381	50.4945	PRTC07	SAAGAFGPELSR	2	12	Label:13C(6)15N(4)@R	32	12	SAAGAFGPELSr	12	35900	35911	0.688548	0.738194	0.528642	0.707963	0.335688	0.427911	0.281501	0.326991	47.186	46.41	0.775987	28	12	MG132
598.297	34.4875	ENG|26_RETVHCDLQPVGPER_3	29.49	39.49	598.298	598.296	598.297	3652	3	27	1982.76	185360	32.8389	38.823	ENG|26	RETVHCDLQPVGPER	3	6	Carbamidomethyl@C	69	15	RETVHCDLQPVGPER	1	114375	114389	0.658285	0.657014	0.456361	-0.376282	0.821978	0.805877	0.596612	-0.415789	33.046	34.49	-1.44402	28	12	MG132
584.304	60.3621	P4HA3|29_DTFSALTSVAR_2	55.36	65.36	584.305	584.303	584.304	10490	2	27	3691.6	1.53448e+06	58.444	64.4301	P4HA3|29	DTFSALTSVAR	2	NA	NA	27	11	DTFSALTSVAR	3	29892	29902	0.653561	0.682685	0.478375	0.0671669	0.660828	0.689174	0.484053	-0.00103188	61.5266	60.36	1.16663	28	12	MG132
794.019	50.9195	EIF4B|46_RDLEGDVSTTWHSNDDDVYR_3	45.92	55.92	794.02	794.018	794.019	7870	3	27	3012.8	691366	49.4812	55.4369	EIF4B|46	RDLEGDVSTTWHSNDDDVYR	3	NA	NA	83	20	RDLEGDVSTTWHSNDDDVYR	1	145844	145863	0.653543	0.641649	0.443499	-0.146548	0.676157	0.663304	0.461693	-0.261777	50.2134	50.92	-0.70661	28	12	MG132
554.272	47.8065	HSP90B1|24_REVDVDGTVEEDLGK_3	42.81	52.81	554.273	554.271	554.272	7008	3	27	2795.2	2.19941e+06	45.8722	51.8143	HSP90B1|24	REVDVDGTVEEDLGK	3	NA	NA	68	15	REVDVDGTVEEDLGK	1	111813	111827	0.63066	0.625538	0.430241	-0.0873206	0.605321	0.600671	0.4102	-0.243336	46.5867	47.81	-1.22327	28	12	MG132
832.87	52.702	TMEM59|36_EAFDSVLGDTASCHR_2	47.7	57.7	832.871	832.869	832.87	9002	2	27	3300.66	227198	50.8498	56.8081	TMEM59|36	EAFDSVLGDTASCHR	2	13	Carbamidomethyl@C	66	15	EAFDSVLGDTASCHR	1	103763	103777	0.626902	0.627941	0.432204	-0.380041	0.618022	0.620522	0.426158	-0.293882	55.0111	52.7	2.31106	28	12	MG132
594.299	39.5989	FKBP11|26_EAGLETESPVR_2	34.6	44.6	594.3	594.298	594.299	5984	2	27	2550.4	3.20536e+06	37.7657	43.7112	FKBP11|26	EAGLETESPVR	2	NA	NA	26	11	EAGLETESPVR	3	28672	28682	0.624597	0.646834	0.447815	0.140338	0.616447	0.63989	0.44204	0.126079	42.5067	39.6	2.90667	28	12	MG132
776.86	67.1829	PDIA3|26_DVLELTDDNFESR_2	62.18	72.18	776.861	776.859	776.86	12442	2	27	4225.93	1.89667e+06	65.2811	71.2462	PDIA3|26	DVLELTDDNFESR	2	NA	NA	52	13	DVLELTDDNFESR	2	72486	72498	0.614669	0.630822	0.434564	0.0285497	0.631299	0.644724	0.446056	-0.0933022	70.4322	67.18	3.25217	28	12	MG132
329.53	27.6908	MTHFD2|36_REAVVISGR_3	22.69	32.69	329.531	329.529	329.53	3329	3	27	1899	945674	25.6882	31.65	MTHFD2|36	REAVVISGR	3	NA	NA	10	9	REAVVISGR	3	9655	9663	0.612975	0.656083	0.455576	0.045088	0.59956	0.644575	0.445931	0.125916	31.65	27.69	3.96001	28	12	MG132
681.355	58.8019	LSM3|7_REQQTTNTVEEPLDLIR_3	53.8	63.8	681.356	681.354	681.355	9462	3	27	3423.6	712349	56.6756	62.6547	LSM3|7	REQQTTNTVEEPLDLIR	3	NA	NA	78	17	REQQTTNTVEEPLDLIR	4	139171	139187	0.601196	0.633017	0.436367	-0.327289	0.624952	0.654247	0.454028	-0.285073	57.06	58.8	-1.73998	28	12	MG132
337.187	35.4809	CALR|18_REPAVYFK_3	30.48	40.48	337.188	337.186	337.187	4163	3	27	2110.41	1.12755e+06	33.6208	39.6123	CALR|18	REPAVYFK	3	NA	NA	3	8	REPAVYFK	1	2504	2511	0.576975	0.58882	0.400815	-0.35769	0.511381	0.532973	0.357851	-0.134647	35.1734	35.48	-0.306574	28	12	MG132
818.891	39.83	ENG|26_ETVHCDLQPVGPER_2	34.83	44.83	818.892	818.89	818.891	5075	2	27	2326.62	142961	37.9662	43.9412	ENG|26	ETVHCDLQPVGPER	2	5	Carbamidomethyl@C	58	14	ETVHCDLQPVGPER	1	84445	84458	0.575107	0.573982	0.389204	-0.344019	0.647589	0.637407	0.439986	-0.344019	38.7769	39.83	-1.05305	28	12	MG132
559.957	43.3358	P4HB|18_RDAPEEEDHVLVLR_3	38.34	48.34	559.958	559.956	559.957	5842	3	27	2517.62	726320	41.6539	47.6228	P4HB|18	RDAPEEEDHVLVLR	3	NA	NA	55	14	RDAPEEEDHVLVLR	3	77126	77139	0.571366	0.59899	0.408862	-0.361137	0.618981	0.642393	0.444116	-0.308418	41.9603	43.34	-1.37967	28	12	MG132
576.587	27.2043	IGFBP4|22_RDEAIHCPPCSEEK_3	22.2	32.2	576.588	576.586	576.587	3279	3	27	1886.14	1.69687e+06	25.4772	31.4357	IGFBP4|22	RDEAIHCPPCSEEK	3	7;10	Carbamidomethyl@C;Carbamidomethyl@C	62	14	RDEAIHCPPCSEEK	1	93207	93220	0.570795	0.575314	0.390241	-0.0248442	0.614926	0.615671	0.42223	-0.248186	31.4357	27.2	4.23568	28	12	MG132
427.226	43.2527	CALR|18_EPAVYFK_2	38.25	48.25	427.227	427.225	427.226	7249	2	27	2853.48	159667	41.82	47.7822	CALR|18	EPAVYFK	2	NA	NA	1	7	EPAVYFK	1	852	858	0.54121	0.566019	0.383035	0.106087	0.549017	0.573547	0.388866	0.126087	47.558	43.25	4.30798	28	12	MG132
607.616	43.539	TMEM59|36_REAFDSVLGDTASCHR_3	38.54	48.54	607.617	607.615	607.616	6359	3	27	2639.22	1.4809e+06	41.7744	47.7747	TMEM59|36	REAFDSVLGDTASCHR	3	14	Carbamidomethyl@C	75	16	REAFDSVLGDTASCHR	1	134468	134483	0.539677	0.538925	0.362339	-0.439817	0.532764	0.534776	0.359208	-0.403807	43.9869	43.54	0.446936	28	12	MG132
448.569	33.1905	FKBP11|26_REAGLETESPVR_3	28.19	38.19	448.57	448.568	448.569	4333	3	27	2151.66	3.81283e+06	31.3465	37.2991	FKBP11|26	REAGLETESPVR	3	NA	NA	39	12	REAGLETESPVR	1	48847	48858	0.514834	0.522799	0.350224	-0.314658	0.524344	0.532346	0.357379	-0.314658	35.861	33.19	2.67103	28	12	MG132
702.834	41.5014	CPSF7|33_DVLTATSQPSDDR_2	36.5	46.5	702.835	702.833	702.834	5744	2	27	2495.15	258487	39.6211	45.5919	CPSF7|33	DVLTATSQPSDDR	2	NA	NA	46	13	DVLTATSQPSDDR	1	61506	61518	0.487203	0.497561	0.331542	-0.0147091	0.488806	0.498812	0.33246	-0.197948	41.5859	41.5	0.085885	28	12	MG132
467.733	29.7107	CENPU|49_NSDVSSIGR_2	24.71	34.71	467.734	467.732	467.733	2636	2	27	1730.56	710744	27.8761	33.8301	CENPU|49	NSDVSSIGR	2	NA	NA	11	9	NSDVSSIGR	1	9895	9903	0.481867	0.502422	0.335116	-0.218292	0.446961	0.471708	0.312724	-0.291606	28.8427	29.71	-0.867333	28	12	MG132
605.827	72.7819	BCL2|130_FATVVEELFR_2	67.78	77.78	605.828	605.826	605.827	12536	2	27	4250.86	14135860	70.8127	76.7943	BCL2|130	FATVVEELFR	2	NA	NA	16	10	FATVVEELFR	1	15568	15577	0.371617	0.402204	0.263512	-0.281853	0.330131	0.365673	0.238323	-0.22278	70.8477	72.78	-1.93229	28	12	MG132
[truncated: 1,252 more rows]

## Sheet: Standards
rt_observe_expect	file_num	treathour	treatment	PCC	Comment
-0.807046	1	0	MOCK	0.987354	PRTC11_SFANQPLEVVYSK_2
-0.391581	1	0	MOCK	0.986075	PRTC08_ELGQSGVDTYLQTK_2
0.243701	1	0	MOCK	0.96527	PRTC15_LSSEAPALFQFDLK_2
[truncated: 627 more rows]

## Sheet: Targets
mz	irt_pred	Comment	lwr	upr	mz_upr	mz_lwr	precursormz	spectrum	charge	nce	rt	tic	rt_start	rt_end	gene_position	sequence	charge_inclusionlist	mod_sites	mods	index	nAA	sequence_mod	spec_matched_nrow	frag_start_idx	frag_stop_idx	PCC	COS	SA	SPC	PCC_pretrained	COS_pretrained	SA_pretrained	SPC_pretrained	rt_min	rt_expect	rt_observe_expect	file_num	treathour	treatment
[truncated: 1,974 more rows]

[truncated: 1 more sheets: Quantification]
